# Supplementary material
Source: publisher figshare collection journal article supplement (https://wiley.figshare.com/ndownloader/files/15045635)
Supplement: Supplementary file 1 [file 15045635]

## Sheet: READ_ME
Title of manuscript: NMR metabolomics to study the metabolic response of human osteoblasts to non-poled and poled poly (L-lactic) acid
Authors: Rita Araújo1,†, Tatiana Carneiro1,†, Paula Marinho1, Marisa Maltez da Costa 1,2, Ana Roque3, Maria Helena Fernandes2, Paula M. Vilarinho2, Ana M. Gil1, *
1 Department of Chemistry and CICECO - Aveiro Institute of Materials (CICECO/UA), University of Aveiro, 3810-193 Aveiro, Portugal
2 Department of Materials and Ceramic Engineering, CICECO - Aveiro Institute of Materials (CICECO/UA), University of Aveiro, 3810-193 Aveiro, Portugal
3 iBIMED - Institute for Biomedicine, Department of Medical Sciences, Universidade de Aveiro, 3810-193 Aveiro, Portugal
* Corresponding author: Ana M. Gil, Department of Chemistry and CICECO - Aveiro Institute of Materials (CICECO/UA), University of Aveiro, Campus Universitario de Santiago, 3810-193 Aveiro, Portugal; Tel: +351 234370707, E-mail: agil@ua.pt
† Authors that contributed equally to this work.
This Excel document comprises the raw data corresponding to the spectra discussed in the paper identified above and is composed of 3 sheets (all acquisition parameters are listed in the Experimental section of the paper):
Sheet 1 - 1H HRMAS spectra of lysed cells of the human osteoblastic cell line HOb
Sheet 2 - 1H NMR spectra of aqueous extracts of HOb cells
Sheet 3 - 1H NMR spectra of lipophilic extracts of HOb cells
In each sheet, column A corresponds to proton chemical shift values and each of the subsequent columns lists spectral itensities for each chemical shift and for each sample.
For a better comprehension of this document, further information is given below about each set of spectra:
Sheet 1 - Data_HRMAS
Control samples (n=5)
Columns: B to F
Sample ID: Hob_S071114_1_1; Hob_S220415_1_1; Hob_S020614_6_1; Hob_S101114a_1_1; Hob_S250415_1_1
PLLA0 (n=6)
Columns: G to L
Sample ID: Hob_N300514_4_1; Hob_N071114_1_1; Hob_N220415_1_1; Hob_N020614_1_1; Hob_N101114_1_1; Hob_N250415_3_1
PLLA- (n=6)
Columns: M to R
Sample ID: Hob_P300514_1_1; Hob_P071114_1_1; Hob_P220415_1_1; Hob_P020614_1_1; Hob_P101114_1_1; Hob_P250415a_1_1
Sheet 2 - Data_AqExt
Controls (n=6)
Columns: B to G
Sample ID: EA_HobS300514_1_1; EA_HobS071114_1_1; EA_HobS220415_1_1; EA_HobS020614_1_1; EA_HobS101114_1_1; EA_HobS250415_1_1
PLLA0 (n=6)
Column: H to M
Sample ID: EA_HobN300514_1_1; EA_HobN071114_1_1; EA_HobN220415_1_1; EA_HobN020614_1_1; EA_HobN101114_1_1; EA_HobN250415_1_1
PLLA- (n=6)
Columns: N to S
Sample ID: EA_HobP300514_1_1; EA_HobP071114_1_1; EA_HobP220415_1_1; EA_HobP020614_1_1; EA_HobP101114b_1_1; EA_HobP250415_1_1
Sheet 3 - Data_LipExt
Controls (n=6)
Columns: B to G
Sample ID: EL_HobS300514_1_1; EL_HobS071114_1_1; EL_HobS220415_1_1; EL_HobS020614_1_1; EL_HobS101114_a_1_1; EL_HobS250415_1_1
PLLA0 (n=6)
Columns: H to M
Sample ID: EL_HobN300514_1_1; EL_HobN071114_1_1; EL_HobN220415_1_1; EL_HobN020614_1_1; EL_HobN101114_1_1; EL_HobN250415_1_1
PLLA- (n=6)
Columns: N to S
Sample ID: EL_HobP300514_1_1; EL_HobP071114_1_1; EL_HobP220415_1_1; EL_HobP020614_1_1; EL_HobP101114_1_1; EL_HobP250415_1_1

## Sheet: Sheet 1-Data_HRMAS
Groups	Controls	Controls	Controls	Controls	Controls	PLLA0	PLLA0	PLLA0	PLLA0	PLLA0	PLLA0	PLLA-	PLLA-	PLLA-	PLLA-	PLLA-	PLLA-
Sample ID	Hob_S071114_1_1	Hob_S220415_1_1	Hob_S020614_6_1	Hob_S101114a_1_1	Hob_S250415_1_1	Hob_N300514_4_1	Hob_N071114_1_1	Hob_N220415_1_1	Hob_N020614_1_1	Hob_N101114_1_1	Hob_N250415_3_1	Hob_P300514_1_1	Hob_P071114_1_1	Hob_P220415_1_1	Hob_P020614_1_1	Hob_P101114_1_1	Hob_P250415a_1_1
10	3248.06	-1171.36	3052.75	7270.44	2449.41	2853.56	-183.688	61.6562	-631.375	1463.38	4751.12	3761.38	5376.38	3452.84	-148.625	795.688	1710.66
9.9998	3743.19	-800.781	3811.44	6489.25	2429.41	2523.19	-514.812	265.469	-1871.5	1283.75	4745.53	3489.06	5363.69	3304.91	-677.75	1688.19	1711.28
9.9996	3772.62	-650.906	4394.56	6005.19	2081.94	2128.06	-2125.31	142.188	-2512.38	688.562	4627.28	3836.94	4628.38	3293.09	-1136.62	2502.25	1582.78
9.9994	3259.31	-611.938	4411.12	6226.75	1807.06	1877.81	-3370.12	-151.375	-2479.88	0	4366.72	3608.62	3697	3202.91	-1162.5	2356.38	1288.5
9.99921	2598	-575.578	4136	6787.75	2038.47	1667.25	-2885.81	-378.875	-1823.88	0	3951.84	2806.88	3499.88	3029.34	-578.125	1267	875.594
9.99901	2423.06	-549.641	3469.31	7148.81	2733.88	1282.19	-1493.56	-410.406	-720.5	0	3408.38	2729.25	4515.06	2907.94	225.25	204.25	486.625
9.99881	3031.06	-611.906	1890	7308.88	3439.88	976.625	-736.625	-245.438	181.375	0	2838.97	3471.75	6174.81	2730.25	657.25	0	349.969
9.99861	4133.5	-778.984	0	7659.88	3851.62	1112.75	-500.688	32.0625	150.125	0	2368.81	3475.62	7286.12	2228.44	725	303.625	639.75
9.99841	5136.88	-975.953	0	8154.38	4036.22	1350.19	474	248.188	-643.75	0	2036.72	2113.19	7259.31	1465.19	977.75	510.25	1274.34
9.99821	5477.19	-1143.52	0	8103.62	4100.97	964.938	2231.94	220.344	-1098.75	0	1778.09	847.312	6725.94	890.781	1441.12	586.938	1941.72
9.99801	4910.62	-1300.94	861.062	7175.75	3965.69	-20.1875	3422.88	-23.25	-517.375	0	1505.81	992.125	6557.75	839.031	1216.5	1135.81	2409.69
9.99782	3896.44	-1438.53	2178.5	6113.62	3571.53	-760.25	3548.5	-197.969	455.5	0	1172.94	1896.38	6510.31	1226.97	-260.125	2191.19	2738.94
9.99762	3422.12	-1406.3	2578.31	5711.88	3051.62	-703.5	3800.69	-78.0625	668.875	0	795.438	2280.25	5553.06	1770.84	-2010	2909.69	3102.88
9.99742	3817.38	-1044.34	2810.81	5446.75	2563.81	-77.75	5062.31	226.938	-78.625	341.562	476.625	2007.06	3560.44	2217.66	-2445.62	2679.75	3498.81
9.99722	4001.62	-446.578	3287.94	4227	2171.81	764.438	6320.69	468.281	-896.125	566.875	367.875	1528.38	1796.19	2349.34	-1391.12	1938.81	3794.34
9.99702	2775.81	32.6719	3371.12	2423.62	2000.12	1639	5956.06	625.938	-927.375	1111.81	520.906	773.125	1332.62	2083.78	-202.625	1500.75	3988.66
9.99682	678.438	115.719	2484.62	1789.62	2240.56	2028.44	3808.12	855.594	-188.375	1970.56	815.188	-281	1773.25	1648.28	286.625	1539.75	4208.56
9.99662	-578.812	-136.031	1196.62	2991.81	2800.91	1281.25	1143.06	1126.91	606.5	2214.31	1123.69	-885.812	2131.5	1386.75	838	1707.81	4423.78
9.99642	-516.438	-460.031	611.125	4576.25	3157.75	-258.312	-811.562	1201.94	712.375	1327.94	1493.62	-509.125	2269.75	1363.5	2187.88	1889.5	4383.12
9.99623	-333.312	-680.953	1043.06	5093.12	2826.41	-1223.06	-1522.44	1008.91	-34.375	171.938	2012.31	159.438	2636.75	1445.88	3356.12	2235.62	3935.25
9.99603	-628.438	-755.625	1880.75	4994.25	1884.5	-924.938	-931.25	768.438	-1006.88	13	2522.62	207.125	3089.81	1759.97	2768	2603.25	3257.56
9.99583	-284.125	-652.422	2547	5426.62	833.281	-300.75	474.375	653.156	-1384	928.125	2684.69	-131.125	3002.06	2626.62	604	2598.19	2655.12
9.99563	1453.06	-379.703	2904.12	6242.56	39.4062	-500.625	1643.44	571.656	-1166.75	1889.31	2399	-98.0625	2393.38	3927.19	-1319.88	2281.44	2264.69
9.99543	3201.38	-93.125	2736.5	6440.81	0	-1328.94	1824.88	429.594	-1236.75	2277.69	2004.28	165.5	2030.25	4971.91	-2031.5	2291.62	2076.22
9.99523	3180	28.2031	1707.38	5791.88	0	-1923	1315.88	369.281	-2095.62	2476.75	1939.56	-75.375	2326	5242.62	-2397.38	2954.81	2105.34
9.99503	1791.06	48.0625	220.5	4819.44	0	-2229.19	764.125	540.062	-3057.62	2887.12	2318.44	-774.812	2869.62	4923.53	-3194.38	3628.19	2358.38
9.99484	932.188	259.438	0	3864.88	0	-2689.5	91.4375	796.094	-3221	3245.69	2932.31	-1102.81	3151.19	4474.34	-3507.75	3353.31	2702.88
9.99464	1286.06	843.344	211.562	3318.12	0	-2947.38	-1070.19	852.844	-2720.38	3273.69	3544.16	-712.938	3141.94	4060.94	-2119.62	2043	2959.25
9.99444	1838.88	1646.62	1138.94	4000.25	0	-2114.81	-2181.12	643.438	-2270.25	3207.62	4030.44	-99.4375	3087.69	3724.12	319.875	614.375	3094.38
9.99424	1872.12	2341.56	862.25	5950.94	0	-219.438	-2119.56	316.188	-1933.38	3183.5	4324.06	317.25	3294.62	3735.69	1827.38	0	3166.94
9.99404	1898.69	2712.3	0	7544.5	0	1662.12	-787.562	-21.5625	-1321.75	2792.88	4401.22	694.812	4133.94	4305.5	1586.38	0	3123.41
9.99384	2419.62	2750.39	0	7382.5	406.281	2684	575.125	-317.312	-720.25	1856.69	4313.84	1253.5	5623.94	5106.16	777	230.812	2855.53
9.99364	2972.81	2567.86	539.312	6521.81	851.344	2726.94	941.875	-394.188	-843	1002.25	4091.06	1864.88	6945.88	5523.38	809.5	638.062	2479.81
9.99345	2828.06	2279.64	1748	7128	1104.75	1781.62	527.812	-43.7188	-1492.5	766.062	3610.16	2295.31	7056.69	5317.91	1683.88	1312.25	2349.97
9.99325	1856.06	1929.38	2188.12	9299.12	1047.28	-19.8125	-12.125	640.438	-1638.62	709.188	2709.31	2429.56	5965.81	4715.34	2410.62	1997.06	2680.28
9.99305	491.938	1512.3	2679.69	11063.6	582.219	-1712.31	-517.812	1228.66	-1015.5	245.188	1471.81	2168.25	4813.94	3950.03	2341.62	2057.06	3274
9.99285	-552.438	1087.98	4138	11328.9	0	-2061	-953.938	1360.84	-477.125	0	280.688	1470.81	4514.75	3088.69	1673.5	1326.31	3713.53
9.99265	-576.562	801.266	5889.62	10838.9	0	-1174.62	-936.875	1076.75	-444.375	116.25	-493.062	592.375	4902.56	2258.94	1066.38	491.625	3729.78
9.99245	377.438	696.109	6800.06	10139.6	0	-523.75	-374	692.5	-219.25	877	-814.5	4.1875	5383.94	1677.16	1046.38	348.938	3332.47
9.99225	1144.62	580.484	7113.31	8761.88	0	-949.25	32.875	478.094	604.75	1123.69	-954.906	-6.0625	5751.62	1393.53	1486.38	989.562	2708.72
9.99205	584.625	234.953	7706.44	6967.94	0	-1653.44	-252.188	525.125	1258	940.062	-1180.88	484.875	6033.19	1270.97	1614.25	2000.25	2111.28
9.99186	-941.125	-274.594	8131	6244.88	0	-1663.44	-578.25	806.406	1144.88	1352.75	-1520.88	1215.62	6138.5	1233.5	914.25	3119.88	1760.62
9.99166	-2057.81	-673.172	7060.81	7087.88	0	-1270.38	45.875	1229.16	983.625	2477	-1814.28	1952.62	6083.94	1294.44	-36.625	4241.38	1715.53
9.99146	-2244.5	-866.578	4576.25	7973.38	0	-1269.88	1329.69	1646.56	1541.12	3106.62	-1919.91	2591.12	6125.19	1349.5	-180.5	4985.81	1848.25
9.99126	-2259.75	-1054.28	2423.25	7567.06	0	-1620.62	1903.75	1901.53	2167.12	2593.44	-1826.47	3181	6306.88	1220.81	631.625	4866.44	2024.62
9.99106	-2729	-1404.14	1724.12	6468.06	0	-1739.88	1161.5	1898.78	1883.75	1907.25	-1575.25	3757.25	6257.31	951.656	1588.12	3944.75	2278.16
9.99086	-3398.12	-1810.31	1764.62	5746.5	192.688	-1533.5	-14	1649.44	1244.62	2098.62	-1167.69	4041.62	5700.19	819	2247	2889.5	2728.53
9.99066	-3948.12	-2071.91	1494.56	5280.69	497.125	-1286.69	-570.562	1261.88	1625.88	2726.12	-641.594	3487.25	4762.81	991.031	2968.62	2262.06	3349.84
9.99047	-4435.88	-2147.8	1053	4781.88	730.156	-1000.06	-500.375	878.781	3008.38	2763.94	-199.344	1869.81	3584.31	1357.88	3807.62	2073.19	3898.31
9.99027	-4597.38	-2111.05	1164.94	5002.25	877.5	-645.312	-364.062	606.5	3983.25	2334.38	-102.375	-197.5	2168.25	1735.34	4079.75	2100.5	4075.25
9.99007	-3798.5	-1976.11	1935	6385.44	1130.06	-690.5	-347.25	520.531	3928.62	2453.19	-354.25	-1544.81	908.938	2062.03	3630.75	2215.06	3738.56
9.98987	-2178.5	-1701.03	2908.94	7686.62	1676.38	-1546.5	-342.125	706.562	3687.5	3399.75	-586.5	-1382.94	617.312	2378.75	3515.62	2219.44	3005.81
9.98967	-866.312	-1271.83	3662.94	7577.69	2501.06	-2750.56	-398.812	1165.66	3835.25	4322.88	-385.875	-7.75	1529.06	2784.59	4513	1816.38	2212.25
9.98947	-473.5	-679.984	3806.38	6680.12	3371.25	-3434.88	-448.938	1621.34	3734.62	4388.75	282.188	1468.25	2802.25	3408.59	5741.38	1109.5	1715.84
9.98927	-272.875	90.7812	3070.88	6323.5	3954.44	-3391.38	6.4375	1586.94	2906.75	3561.25	1046.59	2205.38	3532.38	4244.06	5775.38	822.875	1638.84
9.98908	466.938	935.484	1939.69	6161.69	4001.34	-3026.94	1214.62	818.875	2051.25	2291.31	1484.47	2454.81	3810.75	5018.34	4539.62	1553.62	1791.56
9.98888	1207.44	1564.77	1542.75	4999.44	3559.53	-2573.88	2423.94	-349.5	1804.12	1129.75	1427.53	3086.44	4226.88	5406.06	3040.75	2918.62	1900.66
9.98868	1051.94	1720.45	2300.69	3460.5	3034.81	-2070.5	2603	-1307.69	1497	669	985.969	4291.56	4798.69	5349.16	1725.88	3862.81	1886.06
9.98848	244.812	1454.56	3190.44	3622.75	2906	-1793.88	1867.12	-1779.88	268	1176.81	425.188	5165.69	5106.06	4996.09	357.375	3804.44	1847.34
9.98828	-197.938	1101.33	2966.12	5884.44	3294.66	-1826.56	1412.38	-1968.38	-1252.75	2066.62	35.875	4808.06	5155	4426.03	-788.375	3125.06	1827.06
9.98808	45	956.984	1693.38	8155	3887.59	-1417.44	1876.44	-2129.88	-1583.12	2236.62	-9.9375	3423.75	5338.81	3711	-1009.75	2532.06	1724.59
9.98788	387.375	1022.39	533	8681.25	4320.31	206	2508.25	-2260.75	-459.25	1241.5	246.406	1971.81	5680.88	3177.59	-567.375	2342.31	1473.62
9.98768	367.938	1054.17	399.875	8066.75	4514.31	2398	2341.62	-2255.97	844	0	649.062	1123.25	5822.69	3230.41	-677.875	2496.56	1196.06
9.98749	136.75	849.781	1344.88	7823.75	4556.62	3518.94	1541	-2129.72	1272.38	0	1136.88	1000.62	5733.56	3852.53	-1711	2859.88	1110.19
9.98729	-7.8125	491.609	2842.56	8303.12	4424.41	3044.5	981.312	-1933.44	1089.75	0	1767.19	1458.88	5797.69	4595.75	-2450.25	3237.56	1332.03
9.98709	27.125	295.609	4104.81	8902.5	4059.91	2308.75	918.188	-1638.16	1013	901.688	2494.34	1975.5	6133.12	5135.03	-1732.12	3385.75	1789.84
9.98689	206.125	484.531	4432.19	9237.75	3654	2733.19	818.125	-1265.59	1137.75	1152.62	3049.38	1707	6357.06	5520.06	-51.625	3312	2263.56
9.98669	378.125	944.578	3815.56	9189.38	3568.44	4123.12	382.5	-991.156	1175.75	422.938	3176.75	496.125	6143.56	5817.84	1067.12	3338.75	2476.53
9.98649	283	1357.41	2985.31	8545	3886.81	5259	36	-925.844	1092.75	0	2966.38	-495.5	5623.69	5896.91	789.5	3545.69	2256.78
9.98629	-172.625	1508.47	2499.56	7440.75	4257.38	5485.5	269.938	-885.906	911.375	0	2827.75	-76.4375	5151.88	5745.69	-373.625	3382.31	1715.06
9.9861	-784.438	1368.72	2140.69	6640.94	4319.47	5019.81	1027.12	-578	307.75	532.125	3092.19	1302.69	4943.19	5650.81	-1207.75	2304	1218.06
9.9859	-1354.69	970.078	1577.75	6689.25	4120.34	4150.81	1930.62	12.2188	-938.5	1686.06	3695.28	2194.81	4921.62	5811.03	-775.375	682.625	1074.59
9.9857	-1820.56	407.469	1090.81	7202.75	3930.22	2923	2692	573.844	-2276.88	2175.38	4271.69	2262.06	4726.75	6050.66	809.875	0	1233.09
9.9855	-1952.19	-49.9688	1072	7516.56	3775.38	1509.31	3089.06	802.469	-2806.38	1986	4497.81	2502.81	4075.38	6147.88	2311.62	0	1349.19
9.9853	-1440.25	-83.9062	1300.5	7533.69	3404.91	292.312	2943	655.719	-2419.38	1610.94	4305.09	3389.31	3383.5	6166.75	2483.75	0	1149.31
9.9851	-536.125	357.141	1391.88	7417.62	2707.38	-497.312	2379.25	300.188	-1994.88	1368.12	3836.28	4176.69	3646.94	6193.94	1422	0	672.375
9.9849	1.125	1017.53	1508	7010.31	1939.44	-889.188	1751.81	-59.1562	-2264.12	1332.38	3304.84	4359.44	5185.44	6030.62	350.125	543.375	182.562
9.98471	-26.5	1644.22	1847.38	6235.81	1467.91	-939.562	1043.69	-285.031	-2892.38	1624.75	2896.25	4432.81	6859.94	5497.22	5	1605.31	-60.9688
9.98451	93.4375	2153.11	1892.06	5630.44	1413.19	-681.688	-234.062	-353.375	-2966.38	2252.62	2700.16	4671.19	7260.5	4825.72	-59	2563.19	53.4375
9.98431	779.875	2452.84	1165.19	5695.06	1595.78	-283.312	-2148.56	-325.688	-2109.75	2704	2675.59	4479.81	6443.44	4363.09	-355.375	2822.75	457.656
9.98411	1341	2361.2	435.562	6024.56	1719.72	18.6875	-3769.88	-235.531	-785.75	2194.56	2726.06	3707.19	5638.19	4040.09	-519.25	2857.5	939.562
9.98391	1072.38	1849.33	943.5	5880.69	1571.88	155.75	-4087.94	-49	323	559	2838.88	3332.88	5351.62	3551.34	-17.125	3640.31	1279.72
9.98371	452.875	1180.88	2388.56	5466.38	1169.97	197.312	-3238.38	180.031	891.375	0	3083.66	3882.94	4844.38	2979.12	890.25	5025.38	1415.84
9.98351	305.562	638.406	2963.56	5757.25	787.375	122.5	-2166.06	185.781	988	0	3423.59	4287.25	3715.5	2787.59	1561.38	5625.5	1429.78
9.98331	378.625	250.094	1832.75	6987.31	734.812	-130.312	-1291.75	-318.125	887.375	0	3627.03	3462.69	2866.62	3146.91	1866.75	4603.56	1341.5
9.98312	-47.75	-59.5938	442.625	8131.38	1040.22	-369.5	-359.312	-1303.03	893	778.5	3489.16	2071.31	3163.62	3655.56	2033.5	2814.44	1028.41
9.98292	-503.625	-193.953	568.188	8221	1409.69	-189.938	465.062	-2385.09	1101.5	2143.25	3089.47	1429.69	3936.88	3866.62	2028.25	1640.88	467.812
9.98272	339.438	39.3125	1880.12	7543.12	1543.66	526.875	448.625	-3126.75	1285.75	2254.81	2682.31	1474.06	3776.19	3796.06	1786.88	1275.88	-21.75
9.98252	2606.75	636.328	2488.62	7081.56	1394.75	1344.31	-362.375	-3292.34	1184.38	1559.56	2354.81	1220.88	2476.19	3754.88	1720.12	881	13.0312
9.98232	4713.5	1328.64	1526.69	7244	1070.94	1747.62	-705.875	-2855.84	917.25	969	1974.38	619.438	1321.5	3903.94	2239.88	184.062	657.25
9.98212	5254.5	1774.95	141.75	7674.75	630.375	1811.12	179	-1941.28	911.5	791.938	1497.88	350.75	1495.56	4142.22	2939.25	108.688	1468.78
9.98192	4399.12	1763.66	0	8018.44	102.375	2071.06	1167.38	-815.219	1396.75	735.5	1112.31	119.562	2907.75	4295.12	2954.62	1573.31	1913.12
9.98173	3048.56	1341.59	829.25	8252.5	0	2667	633.688	200.656	2167.25	750.938	942.688	-1144.31	4640.62	4277.91	2129.88	4075.06	1872
9.98153	1620.62	829.219	2067.56	8360.56	0	2989.06	-1205.5	913.625	2847	1206.06	815.469	-3260.69	5918.38	4142	1216.12	5827.56	1641.16
9.98133	300.562	579.5	2890	8282.06	0	2504.69	-2478.38	1311.81	3170.38	2066.69	533.125	-4553.38	6411.75	4025.72	862.25	5354.44	1522.19
9.98113	-338.25	617.75	3484.69	8256.94	0	1642.62	-2077.69	1416.47	3012.62	2585.31	276	-4098.25	6106.56	4008.97	942.375	2929.75	1557.84
9.98093	118.375	639.406	4190.25	8636.62	0	1300.5	-782.25	1188.09	2428.62	2266.06	450.375	-2925.94	5305.19	4034.34	996.875	421.062	1633.62
9.98073	1070.62	433	4763.44	9118.88	0	1557.5	174.125	639.938	1716.62	1647.56	1105.22	-2350.88	4591.69	4060.75	876.75	0	1675.03
9.98053	1340.19	121.781	4689.38	8738.5	232.812	1567.81	549.688	-37.4688	1153.75	1547.12	1738.78	-2202.94	4458	4219.47	756.75	642.938	1682.19
9.98034	463.188	-96	4049.88	7113.5	595.719	907.938	665.5	-535.75	602.125	1873	1828.38	-1555.88	4915.12	4642.44	807.5	2238.62	1668.75
9.98014	-866.375	-184.109	3694.56	5308.12	1116.75	271.375	498.938	-589.594	-293	1877.94	1433.72	-388.312	5567.75	5184.44	1058.62	3296.19	1657.94
9.97994	-1639.38	-75.25	4355.44	4785.44	1639.88	307.375	-55.0625	-110.469	-1393.12	1452	1127.31	487.438	6026.44	5531.03	1428.88	3918.38	1708.22
9.97974	-1522.94	453.984	5738.81	5619.75	1810.41	435.75	-651.188	705.375	-1944	1420.38	1362.72	753.75	6142	5567.81	1787.25	4729.31	1874.41
9.97954	-961.438	1393.52	6725.56	6431.62	1367.41	-320.875	-993.562	1377.12	-1448.5	2372.75	2034.81	878.938	5898.94	5405.12	2030.75	5680.19	2136.12
9.97934	-448.25	2201	6478.19	6188.88	481.406	-1675.56	-1458.44	1424.44	-365.25	3726.75	2682.97	1129	5294.62	5041.16	2077.38	6037.69	2395.19
9.97914	111	2300.06	5198.88	5402.62	0	-2275.75	-2462.62	796.906	400.75	4306.75	3029.16	1105.56	4449.75	4300.34	1765.62	5420.44	2552.5
9.97894	1093.44	1801.55	3764.75	5205.38	0	-1625.06	-3476.75	-50.3125	512.125	3656.69	3217.28	550.25	3728.31	3204.47	982.375	4361.19	2573.59
9.97875	2236.38	1369.62	2775.31	5810.56	0	-844.938	-3444.94	-596.594	383.75	2550.12	3527.56	47.9375	3543.69	2132.62	48.5	3722.81	2475
9.97855	2521.44	1402.08	2105.38	6457.88	0	-1105.75	-2147.44	-690.969	515.75	2222.31	3975.53	390.75	4014.94	1444	-301.25	3816.19	2253.88
9.97835	1401.44	1692.28	1389.88	6594.81	29.4375	-2009.31	-496	-487.125	997.375	3149.69	4317.28	1396.19	4938.56	1126.69	313.375	4207.75	1843.12
9.97815	-238.562	1897.3	777.5	6491.75	360.656	-2155.31	566.188	-114.031	1592.25	4581.69	4416.44	1916.31	6092.94	959.25	1297.75	4231.44	1161.59
9.97795	-994	1956.55	933.812	6678.81	939.531	-947.875	893.062	389.469	1963	5312.38	4424.81	1234.12	7359.62	835.906	1610.12	3572.31	230.375
9.97775	-605.625	1943.98	2142.94	7271.12	1603.69	783.062	798	903.938	1782.12	4866.25	4511.22	20.25	8475.06	782.781	891.25	2417.81	-762.156
9.97755	8.875	1835	3622.31	8035.19	1913.41	1899.25	480.75	1239.47	895.875	3765.62	4557.84	-519.25	8927.75	831.188	-230.125	1171.81	-1535.25
9.97736	264.25	1594.97	4154.25	8795.56	1541.53	2207.19	60.375	1338.03	-512.5	2733.06	4299.88	-147.625	8351.5	1040.31	-915.875	158.562	-1884.69
9.97716	548.188	1289.02	3476.31	9494.44	608.625	2425.94	-220.562	1276.5	-1996.75	2052.75	3705.66	331.125	6946.44	1484.78	-841.875	0	-1813.88
9.97696	1242.38	972.438	2635.12	9948.62	0	3117.06	-158.625	1045.97	-3038.62	1766.25	3027.91	312.625	5364.81	2042.66	-116.125	167.125	-1531.91
9.97676	2026.56	637.938	2701.88	9812.62	0	3909.38	186.125	536.094	-3156.75	1917.06	2478.22	-65.875	4250.31	2354.94	1093.38	1868.69	-1311.81
9.97656	2547	350.812	3466.19	8919.12	0	3940.75	571.75	-179.406	-2160.75	2279.62	2042.75	-600.5	3904.44	2205.97	2554.38	4235.06	-1288.59
9.97636	3005.69	247.125	3820.25	7579.12	0	3005.38	754.812	-748.812	-629.375	2346.81	1688.59	-1294.5	4127.75	1829.28	3757.62	5970.44	-1348.09
9.97616	3571.12	318.547	3260.44	6339.12	0	1945.19	578.5	-892.719	121.875	1999.62	1569.12	-1678.69	4243.62	1630.62	4033	6069	-1230.91
9.97597	3838.5	393.062	2504.31	5370.62	0	1705.69	111.562	-709.531	-831.75	1732.12	1853.53	-855.375	3617.19	1706.28	3042.25	4728.81	-768.719
9.97577	3447.31	414.984	2539.81	4340.06	126.5	2282.62	-269.562	-455.406	-2821.5	1798.94	2425.62	1157.75	2424.81	1849.41	1185.25	2991.44	-1.8125
9.97557	2758.81	544.906	3450.06	3129.69	1207.06	2931.19	-224.062	-140.781	-4001.12	1731.69	2931.94	2937.31	1598	1945.56	-539.625	1574.75	928.906
9.97537	2370.38	881.234	4404.25	2429.62	2168.88	3164.31	36.75	403.125	-3245.25	1285.12	3163.44	3264.31	1699.88	2111.44	-1230.12	400.5	1913.75
9.97517	2350.94	1281.72	4621.38	3092.62	2660.75	3079.5	-123.812	1082.47	-1283.62	1172.44	3265.41	2580.94	2261.31	2460.03	-781.375	0	2826.22
9.97497	2447.19	1576.88	4111.31	4916.81	2610.28	2879.31	-952	1447.56	358.25	1941.88	3483.34	2079.44	2673.31	2954.41	120.125	0	3430.41
9.97477	2630.88	1760.02	3499.12	6662.94	2271.12	2657.5	-1879.75	1172	1172.12	2721.88	3766.34	2018.75	3229.31	3516.91	753.625	0	3498.81
9.97457	2907.31	1831.83	3305.12	7471.12	1954.06	2637.94	-2178.56	449.938	1853.75	2307.94	3759.53	1872.38	4502.19	4109.03	1042.38	633	3058.09
9.97438	2967.12	1668.56	3525.12	7674	1708.06	3040.31	-1838.31	-244.344	2857.12	1133.12	3232.12	1557.12	6038.38	4668.44	1402.25	1701.88	2416.88
9.97418	2649	1244.34	3860.81	7844.56	1367.19	3625.31	-1462.81	-682.656	3599.88	704.562	2401.53	1406.06	6729.19	5092.56	2050.62	1309.81	1908.5
9.97398	2465.88	814.234	4114	7655.75	927.688	3894.62	-1363.06	-980.75	3507.12	1137.62	1709.91	1294.06	6467.06	5291.62	2710.75	0	1679.84
9.97378	3056.19	633.891	4169.81	6397.5	690.281	3817.56	-1155.81	-1226.38	3206.62	886.375	1325.81	884.812	6333.06	5169.09	3016.12	0	1750.59
9.97358	4291.06	592.25	3805.38	4305.31	878.719	3825.56	-418.25	-1246.44	3853.62	0	1030.22	467.688	6857.56	4630.19	2971.12	0	2139.12
9.97338	5492.69	363.781	2932.94	2575	1272.06	4020	590.562	-850.031	5417.12	0	609.062	472.562	7154.94	3778.28	2838.75	991.688	2807.16
9.97318	6347.75	-100.328	2030.62	2064.12	1461.91	3989.5	1239.31	-180.406	6522.75	0	158.875	432.5	6347.62	3033.78	2684.12	975.938	3546
9.97299	6971	-451.828	1884	2617.81	1413.56	3519.12	1442.12	312.25	6262.38	0	-108.031	-360.812	4942.88	2818.12	2263.5	0	4057.12
9.97279	7165.31	-358.094	2718.94	3703.38	1483.38	2810.12	1792	248.562	5370.25	0	-173.656	-1367.69	4042.75	3095.25	1389.25	0	4164.16
9.97259	6357.81	108.453	3919.88	4985.25	1834.47	1857.38	2637	-367.031	5028.62	0	-119.875	-1308.19	3877.88	3416	186.5	0	3883.75
9.97239	4513.94	545.734	4741.38	6043	2123.06	421.375	3495.25	-1166.28	5131.75	0	162.562	-146.75	3940.62	3436.38	-1121.75	0	3314.59
9.97219	2638.56	598.609	4920.56	6237	1947.75	-1076.44	3764.88	-1701.38	4611.38	0	893.219	824.188	4042.5	3206.62	-2438.38	0	2569.44
9.97199	2000.56	229.234	4473.88	5422.12	1441.75	-1536.56	3608.62	-1758.12	3207.75	0	1998.56	1020.88	4383.38	2937.44	-3558.75	0	1834.72
9.97179	2907.12	-309.453	3454.69	4417.5	1197.88	-645.25	3526.94	-1471.31	1947	0	2999.47	1204.25	4926.69	2724.38	-3984.62	0	1380.88
9.9716	4321.56	-697.406	2245.19	4181.19	1628.47	431.5	3340.56	-1152.91	1758.38	0	3386.53	1719	5491.31	2597.03	-3455.75	197.375	1407.75
9.9714	4727.75	-748.094	1536.62	4678.88	2521.94	549.312	2467.19	-1002.88	2426	703.812	3011.44	1653.44	6168.81	2626.88	-2551.88	898.25	1884.88
9.9712	3556.38	-446.156	1519.69	5084.5	3225.16	99.625	1203.06	-1016.47	3167.75	2102.94	2123.53	521.062	6918.75	2821.97	-2147.12	1049.06	2578.94
9.971	1823.25	110.484	1544	5020.56	3204.06	186.062	707.875	-1157.28	3573.5	2477.62	1188.69	-568.875	7114.62	3026.78	-2224.38	876.438	3228.84
9.9708	1083.06	735.969	1095.5	5001.12	2458.41	903.812	1336.31	-1482.22	3632.12	2072.44	672.969	-396.625	6352.81	3060.56	-1972.62	655.312	3681.91
9.9706	1677.12	1199.98	624.312	5485.25	1445.09	1464.88	1941.75	-1981.41	3421.25	1473.25	765.062	788.375	5410.81	2906.5	-1281.62	479.062	3904.03
9.9704	2475.75	1395.97	777.625	6050	595.031	1601.81	1492.88	-2378.91	3175.62	718.562	1182.94	2122.75	5416.81	2717.47	-1200.88	389.062	3923.22
9.9702	2536.94	1466.39	1338.44	5964.88	0	1690.12	531.875	-2285.47	3208.5	8.0625	1392.66	3477.31	6216.38	2709.12	-2312.62	359.812	3793.03
9.97001	2336.75	1613.44	1757.62	5290.25	0	1666.31	129.188	-1599.06	3408.75	247.312	1125.31	4811.62	6582.88	3039.72	-3555.5	331.562	3604
9.96981	2803.56	1769.33	2232.12	4850.75	0	1049.38	124.25	-645.719	3246.25	1901.75	587.719	5183.56	5999.81	3647.88	-3655.5	472.062	3511.34
9.96961	3764.94	1631.06	3153	5159.25	0	147.438	-414	117.875	2603.5	3904.88	138.406	3881.31	5159.12	4197.38	-3039.38	1058.19	3692.31
9.96941	4247.38	1097.23	3834.88	5880.75	0	78.375	-1414.5	456.469	2107.5	4682.06	-64.9375	1936.19	4601.88	4385	-3047.12	1884.38	4201.53
9.96921	3976.62	497.203	3209.56	6455.25	0	1176.12	-1811.94	398.469	2241.62	4029.62	-42.8125	1014.62	4009.94	4358.66	-3673.25	2322.94	4852.41
9.96901	3576.19	259.234	1821.88	6704.31	0	2306.38	-1211.38	80.0625	2630.75	3217.69	130.969	1147.06	3149.94	4599.19	-3576	2308.75	5313.66
9.96881	3336.31	478.641	1610.19	6559.25	0	2306.75	-282.375	-343.438	2709.38	3357.69	263.781	1041.25	2436.88	5271.03	-2298.62	2601.31	5387.12
9.96862	2790.62	935.703	3194.69	5757	275.625	1402	553.312	-719.312	2625.25	4344.5	69.5	480.438	2119.44	5933.09	-991.5	3521.44	5170.25
9.96842	1734.38	1396	4749	4365.12	302.75	612.75	1520.88	-965.5	2859.88	5388.12	-493.719	726.25	1927.81	6089.44	-627.375	4131.88	4908.16
9.96822	805.438	1711.62	4386.75	3238.5	0	307.938	2321.12	-1107.41	3312.12	5931.19	-1035.66	2201.38	2009.31	5819.31	-861.125	3493.88	4727.59
9.96802	651.375	1740.28	2511.62	3249.88	0	-12.125	1911.75	-1169.75	3443.25	5834.88	-1126.19	3336.31	3076.38	5606.41	-1095.5	2166.12	4582.06
9.96782	1109.94	1421.33	784.812	4191.12	0	-779.562	61.375	-1060.22	3122.12	5138.31	-805.531	2606.75	4915.31	5694.12	-1337.5	1464.81	4412.97
9.96762	1567.88	951.797	0	5067	0	-1763.12	-1985.69	-644.062	2683.75	4039.88	-497.375	686.812	5926.06	5907.91	-1389.38	1652.88	4241.38
9.96742	1638.94	694.109	0	5366.44	0	-2364.62	-3073	80.3438	2255	3007.81	-496.531	-430.938	5224	6035.31	-543.375	1965.12	4079
9.96723	1198.88	830.453	0	5340.81	0	-2233.31	-3349.81	949.219	1630.5	2575	-763.031	129.875	4194.19	6056.41	1021	2151.12	3866.31
9.96703	226.125	1205.56	0	5124.38	0	-1633	-3271.81	1751.34	817.25	2827.44	-1124.69	1499.12	4600.31	5971.62	1747.88	2714.94	3572.06
9.96683	-1041.94	1540.84	559.062	4529.62	783.281	-1254	-2565.12	2306	209.375	3178.06	-1390	2512.81	5919.94	5689.84	719.375	3594.25	3265.34
9.96663	-2101.88	1703.12	810.125	3878.44	1236.31	-1474.38	-1216.25	2468.78	164.5	2944.88	-1304.66	2855.12	6191.81	5202.38	-819.25	3883.12	2987.75
9.96643	-2523.31	1723.75	0	3996.75	1293.81	-1850.69	-410.5	2211.06	691.75	2292.88	-743.406	2739.38	5098	4691.72	-1095.75	3238.12	2621.62
9.96623	-2028.56	1656.84	0	4912.38	1303.5	-1705.75	-1058.12	1740.53	1473.88	2244.88	-15.1875	2265.94	4352	4371.06	-93.25	2507.44	2033.41
9.96603	-338.625	1511.17	0	5517.62	1409.97	-1172.38	-2090.19	1415	1995.38	3332.94	320.219	1522.5	4894.5	4329.84	1008.5	2468.38	1351.69
9.96583	2396.81	1299.95	252.125	5189.81	1320.19	-1077.75	-1788	1419.53	1934.38	4532.19	55.1875	942.188	5521.75	4567.91	1793.12	2779.5	960.875
9.96564	4954.69	1094.02	1445.5	4812.12	831.938	-1672.25	-441.875	1564	1681.12	4288.75	-485.719	1058.56	5006.12	5020.88	2492.62	2675.75	1146.06
9.96544	5694	990.781	2378.25	5252.06	299.781	-2156.06	-25.25	1492.19	1994	2640.12	-939.969	1836.38	4085.31	5480.38	2566.38	1996.25	1824.75
9.96524	4312.19	1013.56	3440	5690.31	238.719	-1854.38	-1228.5	1075.66	2748.5	1452.94	-1260.81	2539.94	4223.38	5643.25	1202.12	1099.88	2687.44
9.96504	2295	1054.41	4509.81	4783.62	621.312	-1271.5	-2509.06	498.188	2691	2138.31	-1415.94	2519.81	5329.81	5369.31	-845.375	447.375	3509.38
9.96484	1171.81	972.438	4792.25	2990.12	916.969	-1405	-2553.19	-55.5938	1201.25	3841.12	-1099.34	2035	5891.25	4844.53	-1587.38	650.938	4214
9.96464	994.5	775.281	3868.94	2236.88	790.406	-2381.25	-2133.06	-641.219	-312.5	4534.12	-114.156	1950.94	4952.5	4440.09	-338.375	2140.44	4688.16
9.96444	1071.44	636.703	2431.31	3298.06	449.375	-3344.75	-2591.19	-1343.22	96.75	3395.12	1145.97	2534.06	3073.94	4451.62	1323.12	4226.94	4712.88
9.96425	1403.5	665.375	1690.31	4895.62	268.281	-3491.44	-3639.19	-1909.12	2297	1368.12	1997.81	2973.31	1564.56	4947.91	1521	5237.75	4174.03
9.96405	2432.62	705.219	2085.94	5659	347.844	-2738.5	-3888.19	-1849.28	4172	0	2209.91	2464.06	1405.94	5743.84	44.75	4293.88	3291.91
9.96385	3834.69	473.203	2729	5703.75	565.531	-1577.81	-2953.12	-1021.12	4357.62	0	2116.03	1437.06	2649.19	6493	-1939.88	2409.06	2550.41
9.96365	4641.06	-92.2812	2381.94	5784	843.219	-735.188	-1805.88	60.1875	3665.75	0	2008.62	1100.94	4306.31	6929.5	-3210.38	1164.81	2354
9.96345	4494.56	-702.203	1095	6028.56	1169.5	-773.062	-1188.5	706.844	3496.38	622.062	1789.19	1831.81	5137	7067.84	-3171.12	863.812	2739.38
9.96325	3923.62	-981.297	446.625	6239.25	1435.34	-1508.12	-721.625	787.969	3993.38	2003.31	1326.19	2681.56	5016.19	7082.97	-2024.62	803.25	3403.78
9.96305	3369.62	-824.469	1672.25	6539.94	1424.88	-1934.62	202.5	755.844	4377.38	2780.56	817.156	2678.44	5081.38	7020.41	-669.75	861	3993.72
9.96286	2758	-456.734	3874.31	6903	1009.12	-1223.81	1385.56	964.625	4215.38	2682.12	532.094	1995.31	5991.12	6803.44	68.375	1668.88	4359.56
9.96266	2128.75	-166.297	4878.12	6686.44	291.125	276.438	2079.38	1239.94	3645.38	2265.62	366.406	1406.94	6689.56	6532.62	256.875	3205.44	4556.31
9.96246	1898.56	-32.7812	3828.5	5489.81	0	1492.75	1898.31	1226.06	2951	2224.25	-69.125	1065.5	5834.69	6508	474	4247.69	4665.03
9.96226	2208.94	61	2039	4030.19	0	1924.31	1121.12	904.812	2535.38	2706.06	-913.594	453.938	3977	6799.44	812.5	3707.25	4684.75
9.96206	2587.31	196.312	1044.25	3416.25	0	1891.81	252.625	553.656	2828.38	3423.81	-1790.44	-597.125	3075	7004.06	982.5	1999.94	4596.62
9.96186	2523.81	284.047	812.312	3881.06	0	1595.38	-415.375	342.625	3688.38	4060.62	-2145.91	-1471.88	3883.69	6664.25	1156.38	622.688	4456.31
9.96166	1946.88	195.672	543.875	4877.44	0	764.062	-811.812	208.5	4325.75	4401.69	-1788.25	-1472.75	5061.56	5821.28	1722.25	573.625	4367.28
9.96146	1007.19	-42.3281	382.875	6039.88	0	-506.125	-896.312	51.25	4241	4400.25	-1045.12	-567	5178.19	4932.41	2311.88	1548.94	4384.97
9.96127	-55.125	-261.344	1198.31	7274.88	0	-1360.38	-654	-170.188	3726.75	4256.56	-398	709.562	4498.31	4305.09	2211.88	2637.94	4478
9.96107	-664.25	-326.719	2932.69	8178.38	110.281	-1209.06	-272.25	-496.625	3050.88	4110.5	-12.1562	1791.19	4182.38	3848.81	1740.75	3408.75	4559.94
9.96087	-199.688	-229.734	4266.88	8230.19	725.469	-621.5	-152.312	-901.594	1864	3594.62	303.594	2395.19	4623.88	3375.88	1946.12	4034.5	4532.62
9.96067	1082	-47.2969	4138.44	7559	1300.47	-532.062	-581.938	-1177.81	97.125	2178.5	683.5	2593.94	5379.81	2907.84	2726.5	4574.69	4334.22
9.96047	1973.19	85.875	2857.94	6811.19	1764.03	-893.875	-1387.19	-1123.12	-1228.12	148.625	923.344	2769.81	6107.88	2600.84	2636.88	4707.88	3987.22
9.96027	1662.75	1.875	1442.5	6234.5	1987.84	-869.875	-2007.06	-888.031	-1078.12	0	765.656	3273.88	6647.38	2526.22	1084.75	4373.69	3569.59
9.96007	727.938	-347.547	426.938	5566.75	1980.16	-206.75	-1977.81	-933.844	64	0	343.406	3947.62	6516.75	2623	-596.125	4124.81	3099.84
9.95988	273.125	-741.688	0	4911.62	1942.28	419.75	-1351.81	-1548.59	773.875	0	73.875	4215.88	5289.88	2773.56	-1029	4359.5	2508.88
9.95968	504.312	-849.281	0	4988.88	2000.97	536.938	-633.125	-2529.03	666.125	267.938	109.625	3868.56	3466.56	2868.5	-585	4652.12	1813.19
9.95948	835.688	-600.578	0	6155.88	2010.56	515.625	-265.562	-3392.44	726.875	681.188	182.781	3494.62	2167.94	2879.12	-338.25	4497.12	1280.12
9.95928	1106.19	-270.922	0	7671.06	1792.66	704.75	-178.562	-3780.94	1527.75	1255.5	88	3788.88	1798.19	2902.69	-224.25	4308	1269.28
9.95908	1770.5	-126.094	320.562	8369.56	1468.91	699.25	25.875	-3653.72	2205	2127.81	27.6562	4597.75	1657.81	3043.81	568.125	4777.38	1841.28
9.95888	2782.81	-129.703	994.375	7860.62	1331.31	154.938	341.375	-3283.38	1809.5	2818.81	263.938	5068.44	1105.81	3228.97	1986.38	5520.12	2625.78
9.95868	3162.12	-104.016	905.25	6751.19	1430.22	-228.438	74.125	-3124.25	878.375	3107.5	667.719	4690.88	439.125	3274.31	3062.38	5487.94	3193.56
9.95849	2194.06	-29.7656	0	5821	1541.5	546.812	-1308.69	-3461.75	792.375	3454.38	918.562	3769.88	177.125	3199.84	3211.62	4715.75	3516.97
9.95829	561.188	-16.3438	0	5254.75	1560.72	2288.56	-3147.12	-4045.47	1909.12	4263.25	1007.09	2860.06	69.875	3319.72	2700.88	4381.56	3933.88
9.95809	-350.75	-62.5156	0	4703.69	1678.88	3811.81	-3972.12	-4236.25	3188.88	5201.69	1176.41	2189.69	-402.688	3878.09	2046.25	4853.62	4647.62
9.95789	-82.0625	-26.6094	0	3940.81	2075.34	4565.5	-3112.12	-3676.16	3649.25	5616.5	1388.94	1767.5	-800.312	4687.03	1686.5	4996.81	5402.69
9.95769	550.375	195.812	0	3280.88	2639.56	5027.88	-1479.81	-2677.03	3398.12	5314.44	1233.84	1603.94	48.5	5287.56	1987.12	4019.5	5750.81
9.95749	740.062	602.438	693.938	3235.56	3121.97	5326.81	-514.062	-1797.53	2972.25	4568	502.625	1573.88	2339.31	5431.97	2803.75	2770.38	5545.69
9.95729	756.812	1146.72	1118.69	3821.19	3397.12	4684	-720.312	-1202.31	2370.25	3567.94	-412.844	1417.88	4635.56	5259.12	3189.38	2337	5030
9.95709	1399.56	1710.48	1182.81	4484.56	3450.75	2885.94	-1483.38	-660.656	1358	2317.5	-893.594	1140.62	5525.06	5027.84	2221.88	2464.69	4467.31
9.9569	2717.31	2041.72	998.125	4791.44	3260.75	1228.06	-1887.88	-37.375	321.875	1078	-721.281	1077.19	5364.88	4859.72	111.625	2438.94	3881.34
9.9567	3760.62	1909.97	751.938	4850.94	2861.62	921.688	-1428.75	538.156	53.875	515.188	-194.906	1293.31	5545.5	4774.75	-1932.5	2577.94	3236.56
9.9565	3660.81	1377.19	782.562	4886.25	2430.19	1280.19	-343.375	987.594	730.75	1124.06	244.344	1304.38	6355.56	4791.44	-2807	3533.12	2707.34
9.9563	2652.81	784.172	1356.62	4793.94	2140.59	727.938	454.188	1454.22	1757	2569.44	357.344	797.25	6668.81	4875	-2192.88	4777.06	2581.22
9.9561	1839.75	414.094	2417.5	4487.56	1985.94	-803.688	238.375	2023.72	2652.38	3786.06	196.594	312.25	5855.44	4901.44	-518.25	5202.44	2940.91
9.9559	2041.44	269.078	3644.56	4281.5	1867.31	-1820.38	-435.125	2472.41	3398.62	3834.81	38.4688	672.5	4860.12	4800.69	1308.62	4895	3597.66
9.9557	3024.5	213.891	4643.06	4407.81	1790.59	-1467.81	-152.688	2466.06	3781.5	2705.44	181.844	1874.12	4782.56	4677.31	2460	4986.94	4322.06
9.95551	3863.38	213.625	5027	4476.38	1827.09	-433.438	1404.81	1930.72	3263.88	1333.94	652.406	3026.19	5286.75	4689.25	2915.75	5868.69	4986.75
9.95531	3931.69	330.984	4577.62	4030	1930.34	476.188	2715.81	1113.81	1977.62	853.375	1100.69	3345.06	5293.88	4865.72	3329.12	6727.69	5480.38
9.95511	3433.38	552.172	3560.5	3363.12	1954.34	1284.81	2338.5	338.75	1026.25	1710.44	1101.69	2825.94	4634.69	5143.25	3901	6834.81	5671.31
9.95491	2993.94	720.125	2746.25	3032.56	1852.38	1965.75	801.062	-201.781	1077	3321.06	577.375	2035.12	4007.25	5501.88	3992.88	6220.44	5544.25
9.95471	2936.25	655.734	2835.06	2791.5	1727.34	1935.38	-380.125	-467.875	1318.88	4527.25	-127.281	1673.88	3671.75	5919.28	3289.25	5090.56	5248.25
9.95451	3165.25	320.391	3808.5	2008.12	1681.34	1126.38	-820.125	-533.625	704.75	4541.75	-568.75	2248.38	3290.56	6247.22	2569.88	3617.19	4924.91
9.95431	3646.94	-132.859	4953.94	1110.06	1723.88	430.438	-1128.06	-564.406	-357.5	3592.69	-560.781	3637.38	2940.81	6333.72	2572.75	2333.81	4586.47
9.95412	4545.88	-454.125	5533.19	1407.88	1820.75	233	-1246.44	-735.031	-679	2606.38	-261.656	4923.94	3144.38	6277.72	2810.38	1722.06	4215.97
9.95392	5661.25	-454.797	5376	3120.88	1913.84	-426.688	-551.062	-1074	-261.5	2211.06	15.4375	5122.06	3747.75	6354.78	2501.62	1351.94	3848
9.95372	6112.62	-96.2188	4863.5	4762.88	1899.03	-2191	534.438	-1400.59	-270.375	2192	96.1562	4203.94	3862	6616.53	2064.12	438.562	3458.81
9.95352	5126.5	534.938	4409.62	5203.88	1725.34	-3839.62	675.812	-1509.59	-1077.88	2005.81	97.5312	3081.06	3289.5	6765.97	2426.88	0	2925.09
9.95332	3076.31	1279.14	4016.25	5275.12	1541.09	-3761.25	-413.5	-1451.75	-1685.12	1560.38	257.438	2542.75	3026.88	6576.94	3197.38	0	2241.31
9.95312	1237.81	1930.58	3419.88	6305.31	1603.09	-2340.06	-1631.25	-1519.28	-1362	1191.69	589.375	2598.94	3793.56	6270.88	2926.75	0	1668.44
9.95292	416.062	2311.11	2671.69	7926.38	1978.41	-1424.12	-2365.12	-1834.28	-617.125	1085.12	806.156	2891.5	4916.31	6257.5	1253.88	696.938	1501.47
9.95272	263.438	2390.42	2296.06	8666.38	2443.94	-1720.81	-3141	-2046.72	-65.5	1163.44	678.781	3271.06	5386.56	6576.12	-522.25	404	1753.53
9.95253	114.875	2281.41	2611.81	8241.38	2743.94	-2176.06	-3957.75	-1686.81	510.875	1488.88	397.906	3761.81	5323.62	6819.38	-1322.38	0	2220.72
9.95233	-8.5625	2059.83	3135.75	7818.88	2842.34	-1892.38	-3705.56	-861.344	1310.12	2279.44	442.688	4289.88	5526.56	6616.44	-1540.25	0	2791.75
9.95213	360.625	1666.75	3134.75	8086.19	2842.59	-1207.12	-2157.44	-333.438	1740.88	3425.5	1086.62	4648.69	6055.38	6000.78	-1900.12	0	3518.09
9.95193	1233.5	1073.8	2674.56	8428.31	2776.47	-606.5	-995.062	-713.906	1339.12	4408	2105.84	4575.69	6219.88	5262.34	-2125.88	818.625	4401.62
9.95173	2024.94	451.516	2518.69	8202.94	2621.53	81.25	-1619.44	-1727.03	673.375	4830.88	2963.97	3906.38	5833.38	4620.28	-1590.25	2138.88	5270.38
9.95153	2270.69	30.0781	2919.62	7577.44	2480.38	859.688	-3156.69	-2499.44	505.75	4684.75	3236.5	2909.19	5588.5	4145	-634.125	3639.19	5876.78
9.95133	2111.31	-149.734	3198.75	6764.5	2568.62	1025.75	-3939	-2470.12	696	4057.88	2920.12	2293.12	6013.19	3862.78	-350.625	4549.44	6044.09
9.95114	2021.19	-190.844	2818.62	5664.19	2966.41	148.438	-3903.62	-1785.69	747.875	3083.38	2429.94	2386.62	6635.88	3777.34	-1244	4404.81	5795.88
9.95094	2281.5	-99.3594	2192.38	4801.38	3484.09	-1184.31	-4077.62	-907.75	833.25	2247.06	2256.62	2438.31	6474.75	3805.88	-2654.75	3688.19	5448.09
9.95074	2747.44	195.891	1931.69	5368.62	3866.06	-2154.94	-4516.12	-184.688	1351.62	2106.12	2508.81	1430.25	5141.06	3803.22	-3405.5	3024.75	5432.06
9.95054	3014.5	580.484	1902.19	7427.81	4084.25	-2531.44	-4307.06	159.094	1929	2457.88	2797.41	-348.875	3344.12	3686.75	-2707.5	2335.94	5812.12
9.95034	2863.12	760.125	1705.44	9106.56	4334.44	-2204.88	-3132	-4.28125	1814.75	2439.25	2654.22	-1344.31	2335.81	3510.28	-654	1430.94	6076
9.95014	2588.81	640.938	1615	8774.88	4729	-772.188	-1436.94	-502.438	1053.38	1777.25	2037.78	-678	2730.38	3391.94	1825.75	844.062	5661.66
9.94994	2710.94	506.844	2186.69	7320.06	5080.53	1628.06	507	-836.594	436.75	1204.12	1328.75	646.812	3830.19	3363.38	3604	1282.81	4641.91
9.94975	3252.75	662.734	3195.81	6936.62	5068.94	3694.75	2390.06	-626.312	439.625	1165.88	862.125	986.812	4393.75	3307.59	4210.62	2579.31	3619.06
9.94955	3598	1047.56	3818.88	8055.5	4588.91	4088.06	3207.5	-20.0938	882.625	999.938	608.344	-27.5625	4110	3108.53	4051.38	3835.81	2982.31
9.94935	3304.81	1378.91	3764.81	8931.19	3840.56	2912.38	2329.88	510.5	1471.5	193.438	324.531	-1344.25	3834.88	2883.5	3779.5	4347.69	2586.53
9.94915	2799.94	1567.38	3404.12	8339.12	3062.53	1438.44	927.188	734.375	1989.12	0	-123.5	-1806.69	4212.75	2967.06	3640.88	3944.81	2157.91
9.94895	2935.88	1763.84	2837.69	7241.94	2280.06	650.125	774.25	856.844	2109.62	419.062	-650.344	-1034.31	4758.25	3556.75	3434.38	2884.44	1628.97
9.94875	4029.56	2034.48	1763.5	7165.75	1395.94	657.812	1761.88	1179.31	1699.12	2068.69	-1059.44	668.938	4794.19	4442.34	2838	1939.81	975.281
9.94855	5614.69	2222.7	394.188	7976.56	463.25	1176	2151.31	1720.66	1225.62	3136.62	-1196.62	2607.12	4642.12	5224.62	1728.38	2062.44	127.656
9.94835	6931.75	2196.75	0	8238.81	0	1812.25	1288.81	2205.06	1287.5	3398.81	-1059.97	3965.31	5080.31	5759.84	446.25	3255.69	-719.469
9.94816	7370.62	2062.73	0	7345.12	0	2040.31	411.125	2324.75	1793	3865.19	-819.031	4297.81	6013.69	6202.38	-273.875	4213.44	-1039.06
9.94796	6749	2022.2	174.812	6336.5	0	1596.06	476.312	1976.25	2094.12	4718	-707.031	3805.06	6579.38	6613.31	1.25	3812.81	-517.469
9.94776	5615.44	2111.62	507.312	6462.75	0	889.75	799.75	1298.47	1829.88	4915.44	-868.406	2946.5	6427.19	6776.72	763.125	2582.88	529.844
9.94756	5012.19	2188.17	870.125	7472.5	0	511.562	443.875	533.188	1216.12	4227.38	-1292.44	1972.62	6047.75	6533.53	1006.38	1908.62	1534.12
9.94736	5379.75	2125.31	1377.25	7753.62	0	418	-359	-121.875	685.125	4007.56	-1812.84	1037.56	5807.75	6116.25	360.125	2145.94	2259.19
9.94716	5873.56	1927.7	1573.56	6148.06	0	104.25	-852.188	-511.312	613.5	5066	-2111.03	415.5	5456.31	5949.72	-624.25	2459.5	2761.31
9.94696	5385.69	1665.89	1370.19	3324.25	0	-567.562	-780.375	-461.438	1118.38	6147.12	-1840.03	211.938	4783.12	6184.34	-1306.12	2313.06	2999.91
9.94677	4100	1388.2	1710.75	1084.56	0	-1262.06	-230.25	100.594	1733.62	5709.75	-942.062	128.312	4133.94	6565.09	-1533.62	2076.94	2861.78
9.94657	3296.56	1135.33	3358.12	466.625	0	-1726.44	596.812	917.25	1729.75	4218.88	160.156	-98.25	3962.88	6703	-1300.62	2099.94	2475.84
9.94637	3627.31	985.219	5487.81	1016.56	0	-1826	1054.12	1470.53	1219.5	3344.12	872.938	-274.75	4236.19	6345.91	-478.625	2144.25	2168.22
9.94617	4423.88	1001.08	6489.56	1958.62	0	-1183.69	514.562	1444.78	1354.62	3519.31	990.469	-138.625	4472	5464.69	775.875	2026.69	2118.38
9.94597	4887.75	1115.22	5970.25	3314.56	0	406.438	-482.188	1042.03	2741.25	3636	819.312	153.812	4183.06	4282.06	1853.38	2059.94	2279.69
9.94577	5077.88	1130.23	5038.12	5354.94	0	2174.5	-666.812	701.938	4288.75	2869	720.656	372.938	3336.69	3229.31	2345.62	2498.94	2552
9.94557	5260.5	911.844	4651.75	7601.75	0	2871.38	73.1875	592.406	4561.12	1582.38	703.469	710.188	2606.12	2678.16	2481.5	3094.56	2795.56
9.94538	5086.88	568.5	4619.56	9219.75	0	2377.19	581.812	547.219	3729.38	434.25	561.219	1378.88	2896.44	2602.19	2563.75	3478.38	2811.78
9.94518	4201.5	354.75	4422.25	10070.8	0	2015.81	574.188	436.219	3059.25	0	244.344	2019.62	4199.44	2594.94	2388.12	3521.25	2623.34
9.94498	3216.62	382.234	4193.25	10538.1	0	2758.75	1181.12	359.531	2907.38	0	-69.1875	2165.62	5243.81	2312.09	1680.12	3140.56	2650.09
9.94478	3228.88	520.406	4409.81	10564.8	238.125	3803.5	2561.75	445.312	2583.12	0	-204.438	2084.44	4915.75	1835.75	778.125	2302.19	3215.56
9.94458	4411.88	624.594	5087	9811.94	443.219	3682.31	2839.5	671.094	2011.38	0	-150.969	2419.12	3779.88	1525.16	353.375	1452.25	3941.88
9.94438	5712.75	740	5728.56	8615.12	779.844	2337.88	864.25	978.5	2015.88	0	-22.8125	3084.19	3418.5	1564.72	608.75	1376.38	4085.44
9.94418	6020.12	962.781	5866.56	7688.88	1490.5	1184.94	-1518.88	1396.59	2761	1705.69	41.5625	3319.94	4391.75	1785.5	1179.5	2246.5	3517.44
9.94398	5203.75	1194.03	5374.56	6858	2344.75	1170.75	-1785.06	1926.78	3306.88	3546.75	-35.6562	2909.75	5713	1939.03	1697.38	3227	2909.78
9.94379	3924.5	1219.41	4424.94	5294.38	2891.44	1661.31	-194.375	2426.53	3114.5	4051.25	-197.031	2554.12	6346.12	2001.69	2054.12	3383.94	2802.5
9.94359	2817.88	1020	3377	3292.12	2943.19	1566.94	964.188	2745.03	2742.12	2579.12	-267.531	2796.38	6302.94	2086.69	2197.25	2627.19	2936.69
9.94339	2090.81	809.031	2616.12	2515.06	2666.38	881.375	723.812	2900.12	2597.12	387	-107.938	3284.19	6089.06	2131.59	2018.25	1463.88	2786.28
9.94319	1732.94	705.281	2296.69	3808.38	2305.69	484	-10.125	2998.62	2275.62	0	260.562	3444.44	5947.5	1886.94	1419.38	281.812	2376.22
9.94299	1831.56	552	2190.38	5855.31	1986.56	756.812	-638.5	3048.38	1771.75	0	714.562	3269.38	5976.56	1298.25	301.5	0	2184.19
9.94279	2510.62	174.438	1831.88	6892.19	1731.88	1150.38	-1347.38	2989.75	2039.88	922.5	1161.53	3004.94	6230	735.562	-1321.12	0	2442.56
9.94259	3548.31	-337.562	915.75	6864.19	1518.69	1195.62	-1594.75	2877.56	3402.62	1416.69	1555.81	2599.94	6356.69	664.031	-2991.25	0	2933.53
9.9424	4228.88	-772.109	0	6869.38	1330.75	1261.44	-408.062	2867.28	4497.62	1625.94	1833.78	2007.38	5824.31	1138.09	-3920	652.5	3409.12
9.9422	3823.94	-1117.45	0	7202	1242.69	1877.62	1507.56	2989.84	3980.5	1798.12	1937.06	1623.56	4790.19	1781.88	-3814.88	1426.44	3870.91
9.942	2271.06	-1533.03	0	7180.81	1399.84	2749.44	2041.88	3073.53	2473	1699.75	1916.53	1793.56	4028.19	2232.19	-3305.25	1735.56	4380.47
9.9418	269.688	-2018.78	1339.75	6586.38	1815	3084.31	641.062	2966.41	1589.5	1393.88	1939.41	2071.44	3736.31	2421	-3074	1963.81	4821.22
9.9416	-1267.88	-2305.73	3037.56	6088.81	2263.5	2756.5	-859.312	2756.75	1609.12	1441.81	2128.59	1603.88	3277.38	2440.66	-2846.12	2347.12	4953.25
9.9414	-1794.44	-2119.55	4000.44	6230.12	2515.31	2469.88	-1047.38	2680.56	1419.38	1883.56	2402.97	290	2471.12	2369.22	-1854.75	2737.81	4643.84
9.9412	-1375.94	-1431.5	4436.06	6840.25	2605.75	2655.94	-742.25	2835.81	454.5	1997.06	2535.44	-927.812	2138.25	2304.06	-113.125	3172.06	4028.12
9.94101	-630.75	-446.312	4903.38	7494.12	2717.81	2852.62	-1032.38	3064.31	-635	1568.5	2411.97	-1077.44	2710.25	2354	1523	4066.5	3456.19
9.94081	-237.875	498.984	5421.19	7875.56	2847.09	2479.19	-1267	3122.28	-1258	1431.81	2181.5	-107.438	3246.88	2463.66	2534.38	5481.69	3211.19
9.94061	-191.5	1011.73	5616.5	7725.62	2786.56	1675.69	-388.75	2911.47	-1656.88	2107.06	2040.78	1349.06	2747.12	2410.78	3159.75	6618.06	3243.5
9.94041	236.625	846.828	5462.5	7059.44	2452.56	948.938	1079.19	2519.78	-2151.38	2824.12	1899.41	2839	1711.06	2117.5	3514.75	6588.88	3272.94
9.94021	1420.25	181.656	5346.81	6389.06	2028.31	485.188	1888.38	2084.38	-2524.25	2723.88	1467.19	4352.5	1389.75	1816.94	3214.12	5538.06	3168.97
9.94001	2635.5	-441.547	5533.44	6183.44	1724.88	359.938	1941.75	1677.53	-2508.88	2259.12	764.531	5809	2033.06	1754.94	2340.88	4465.81	3070.19
9.93981	3035.31	-601.766	5989.69	6253.75	1564.81	943	1878.25	1317.31	-2215	2424.5	301.844	6710.62	2924.44	1863.75	1949.62	3937.06	3078.69
9.93961	2996.94	-368.094	6590.69	6200.75	1481.41	2272.12	1585.44	1004.22	-1778.25	3141.31	495.719	6595.75	3720.12	1913.97	2783.25	3487.38	3056.41
9.93942	3518.31	-102.281	7048.75	6185.56	1484.72	3250.31	613.938	686.844	-1148.88	3461.88	1068.53	5697.94	4584.25	1870.31	3998.12	2491.38	2868.47
9.93922	4433.75	-19.1719	6846.75	6557.38	1612.94	2438.06	-499.875	249.312	-470.625	3088.06	1375.38	4800.75	5185	1876.47	4098.62	1131.19	2634.44
9.93902	4472.25	-89.1875	5833	7005.5	1803.16	-156.688	-813.562	-362.344	-131	2661.5	1265.25	4362.19	4757.5	1960.94	2918.75	101.125	2538.25
9.93882	3287.75	-264.047	4781.75	6944.5	1904.91	-2816.25	-543.938	-1005.03	-166.125	2602.88	1217.34	4070.94	3323.44	1991	1750.88	0	2531.56
9.93862	2122.81	-577.188	4688.75	6553.44	1781.78	-3946.25	-659.5	-1436.72	-102	2579.31	1579.81	3447.62	1897.94	1911	1509.88	0	2433.53
9.93842	1939.12	-1021.69	5437	6480.75	1386.69	-3602.25	-1129.94	-1578.59	333.625	2249.19	2110.5	2613.75	1246.12	1833.72	1708.38	0	2205.12
9.93822	2186.62	-1493.59	5789.69	6608.06	845.531	-2902.69	-954.438	-1570.5	776	1785.88	2458.06	2122.88	1180.19	1874.81	1523.5	407.25	1911.84
9.93803	2233.81	-1884.72	4908.19	6182.44	495.219	-2548.25	118.562	-1515.66	797	1433.62	2686.5	2134.75	1265.81	2032.25	1019.62	1564.12	1535.81
9.93783	2714.44	-2131.73	3347.88	5270.44	668.344	-2438.06	1183.5	-1315.19	528	1115.5	2995.84	2130.75	1478.56	2209.09	793.625	2772.88	1086.41
9.93763	4193.88	-2195.84	2283	4931.88	1312.47	-2309.75	1520.88	-895.625	387.125	742.375	3233.75	1538.69	1907.75	2229.25	1043.38	3638.38	820.344
9.93743	5553.25	-2108.53	2189.69	5587.56	1928.03	-2069	1148.31	-489.031	514.5	505.688	3102.09	433.875	2455.69	1907.31	1607.75	4312.81	1047.47
9.93723	5335.25	-1997.28	2612.38	6275.56	2020.41	-1548.62	34.375	-462.688	808.25	624	2691.12	-482.938	3093.19	1297.56	2412.62	5144.38	1684.22
9.93703	4126.06	-1924.88	2901.12	6107.25	1557.72	-474.875	-1884.25	-866.875	1235.12	1052	2411.28	-528.312	3835.56	824.438	3170.38	6088.44	2238.06
9.93683	3884.75	-1746.3	2808	5543.94	895.906	1152.81	-3694.31	-1348.97	1760.38	1567.62	2462.47	336.875	4265.5	922.094	3082.62	6721.62	2303.03
9.93664	5044.5	-1303.12	2471.56	5494.19	354.781	2861.25	-3937.88	-1571.72	2188.5	1953	2711.84	1476.38	3765.75	1530.34	1785.12	6638.56	1918.81
9.93644	5921.81	-738.703	2080.56	5886.38	11.9688	3992.69	-2588.75	-1547.12	2411.5	2062.94	3039.75	2258.12	2576.81	2161.38	418.75	5638.19	1432.59
9.93624	5229.69	-418.672	1622	5998.62	0	4167.12	-1361.25	-1488.25	2633.25	1948.81	3435.81	2773.69	1947.94	2471.72	681.875	3828.44	1180.97
9.93604	3701.81	-524.594	994.25	5719.38	0	3506.25	-1375.56	-1518.97	3038.62	1944.81	3740.28	3598.62	2669.31	2528.22	2573.5	1873.31	1315.09
9.93584	2708.56	-914.594	373.875	5607.19	0	2469.12	-1656.5	-1662.94	3443.5	2402.69	3664.62	4707.44	3940.75	2492.19	4064.5	832.75	1736.19
9.93564	2478.19	-1379.94	241.375	5949.5	230.125	1471.5	-818.5	-1950.69	3622.75	3255	3201.53	5084.31	4369.69	2357.84	3548	1213.94	2141.72
9.93544	2386.94	-1787.72	840.5	6527.5	565.312	725.812	766.688	-2337.22	3765.88	3926.69	2749	3889.5	3791	2147.06	1796	2238.81	2272.09
9.93524	2113	-1938.44	1839.56	7200.69	841.531	487.188	1596.5	-2610.72	4147.88	3693.38	2686.72	1695.31	3303.88	2082.91	685.5	2559.19	2135.75
9.93505	1761.62	-1610.34	2802.62	8030	920.312	1171.06	1179.75	-2586.88	4505.25	2211.75	3002.03	-108.875	3495.31	2324.47	622.625	1796.69	1878.75
9.93485	1427.62	-923.891	3699.06	8823.75	818.812	2858.06	435.438	-2331.38	4306.62	0	3414.47	-1019.44	3465	2682.44	379.375	940.812	1516.78
9.93465	1237	-402	4560.38	9167.12	788.625	4826.56	294.688	-1993.12	3608.5	0	3681.59	-1749.75	2171.88	2830.06	-678.875	1048.69	1036.72
9.93445	1418.81	-422.344	4994.12	9035.25	1067.12	6096.69	876.5	-1495.59	3019.38	0	3691.75	-2766.38	295.062	2718.59	-1490.5	1965.06	712.656
9.93425	1907.5	-766.281	4647.69	8909.06	1562.53	6498.12	1854.06	-674.562	2723.38	0	3432.75	-3364.5	-144.312	2592.12	-938.625	2687.44	950.406
9.93405	2251.19	-920.312	3894.25	9086.75	1934.94	6715.5	2776.62	281.094	2257.62	931.75	2992.03	-2698.44	1725.88	2648.81	317.25	2733.06	1699.66
9.93385	2234.81	-660	3355.94	9209	1986.47	7180.75	3109	859.688	1554.88	618.438	2494.88	-1099.31	4234.25	2871.38	579.25	2624.31	2349.53
9.93366	2193.56	-100.641	2955.12	8723.88	1809.66	7477.12	2678.44	831.281	1422.75	0	1993.25	306.562	5006.62	3181.88	-636	2953.81	2437.53
9.93346	2397.44	661.219	2253.38	7654.62	1554.09	7083.56	2059.44	553.188	2329.62	0	1516.34	924.875	3882.12	3600.19	-1994	3437.88	2219.84
9.93326	2495.31	1613.44	1556.19	6635.94	1262.28	6166.31	1966.12	478.531	3327.5	0	1215.81	975.625	2963.5	4189.91	-2121.75	3303.5	2277.66
9.93306	1925.94	2568.55	1629.5	6140.25	1006.22	5247.12	2396.44	592.625	3119.38	157.688	1273.91	703.188	3616.38	4898.28	-1235.38	2453.62	2744.03
9.93286	711.875	3155.62	2245.31	5864.62	970.062	4514	2874.25	586.844	1912.12	1017.56	1625.31	94.375	4605.25	5472.94	-513.375	1717	3223.44
9.93266	-347.25	3163.78	2143.5	5140.25	1242.59	3879.44	3229.88	395.281	1188.62	1930.12	1953.12	-584.562	4032.81	5567.62	-337.25	1749.31	3366.25
9.93246	-249.562	2731.75	821.188	3968.19	1671.62	3374.38	3469.5	211.344	1641	2577.38	2045.5	-706.312	2211.62	5029	75.25	2143.12	3187.94
9.93227	1257.44	2181.28	0	3309	2077.31	3065.06	3171.31	59.2812	2361.12	2356.81	2030.88	-53.9375	1260.25	4118.72	1310.75	2094.19	2832.25
9.93207	3075.44	1815.66	0	4062.25	2481.09	2850.69	1880.06	-251.906	2339.88	1504.5	2204.78	808.125	2155.5	3350.69	2812.62	1660.5	2351.84
9.93187	3500.94	1849.84	0	5962.38	2937.59	2672.81	6.0625	-678.969	1760.5	1136.5	2718.66	1259.44	3617.25	3046.66	3700	1667.5	1845.81
9.93167	2071.25	2302.41	792.438	7847	3247.53	2599.94	-1506.44	-818.875	1242.12	1772.06	3421	1342.19	4151.06	3130.75	3985.25	2367.94	1574.34
9.93147	270.312	2893.06	2351.38	8881	3076.56	2425.12	-2382.12	-454	667.75	2669.56	3864.25	1419.88	3929.75	3375.78	4312.12	2962.06	1733.53
9.93127	-270.625	3230.17	3826.19	9117.94	2351.66	1689.06	-3046.06	12.7812	-390.5	3038.19	3540.62	1490.5	4035.56	3674.97	4729	2762.62	2197.41
9.93107	217.188	3194.53	3975.44	9001	1338.66	539.75	-3480.12	-53.1562	-1606.12	3005.38	2373.53	1323.75	4827.19	3966.31	4503.38	2149.56	2625.38
9.93087	412.812	3037.97	2193.56	8873.56	318.594	-23.0625	-3048.75	-786.25	-2143.88	2835.5	989.531	1043.31	5886.88	4070.06	3260.25	1819.25	2812
9.93068	192.312	3062.91	0	9010.5	0	542.438	-1677.19	-1707.22	-1750.62	2141.94	233.094	1009.06	6906	3814.09	1649.12	1648.19	2854.88
9.93048	670.375	3304.22	0	9520.94	0	1266.75	-240.562	-2305.94	-907.375	757.5	351.75	1201	7718.88	3259.72	604.125	1068.88	2985.78
9.93028	1999.06	3543.09	978.75	9991.19	0	809.562	579.188	-2511.69	-86.875	0	896.344	1300.69	7879.25	2637.41	401.875	252.438	3287.47
9.93008	2781.56	3529.5	2845.06	9684.06	0	-659.25	914.875	-2550.38	489.625	0	1419.53	1397.38	7121.81	2106.06	679.75	32.0625	3586
9.92988	2171.12	3188.08	3585.44	8383.31	0	-1703.5	801.625	-2550.41	571.5	1346.62	1903.06	1939.69	6076.62	1715.75	884.375	649.625	3612.06
9.92968	1118.12	2716.23	3526.5	6731.31	0	-1598.56	-278.062	-2444.81	79.375	2679.75	2414.69	2784.88	5688.75	1540.12	441.625	1358.56	3269.47
9.92948	792.312	2473.11	3592.19	5545.75	394.375	-991.625	-2158.31	-2184.72	-521.625	3375.19	2803.03	3027.12	5949.56	1650.19	-891	1446.44	2738.91
9.92929	993.688	2648.09	3758.81	5095	936.719	-503.5	-3235.25	-1890.66	-761.875	3673.75	3009.16	2242.75	5966.19	1952.03	-2381.75	1000.44	2313.41
9.92909	986.812	3039.2	3335.56	5138.44	1654.31	188.312	-2091.88	-1755.31	-984.375	3644.12	3303.81	1256.94	5351.69	2206.06	-2602.75	412.562	2154.78
9.92889	832.062	3263.16	2192.06	5288.94	2360.91	1394.31	587.438	-1856.28	-1820.75	3250.12	3845.41	995.688	4746	2237.44	-996.75	0	2217.66
9.92869	929.812	3149.53	1012.25	5175	2719.09	2454.25	2774.5	-2085.38	-2859.25	3155.75	4282.25	1140.19	4696.75	2033.53	1258.38	0	2348.22
9.92849	1116.94	2802.44	455.5	4663.75	2569.81	2472.69	3468.62	-2213.88	-2788.88	4063.94	4197.19	820.562	4779.56	1660.47	2606.5	0	2395.06
9.92829	1141.88	2352.05	484.125	4166.81	2035.56	1552.19	3277.88	-2009.34	-1166.12	5219.38	3740.75	206.688	4339.31	1218.72	2869.75	0	2264.84
9.92809	1282.56	1851	563.25	4404.12	1361.16	684.625	2856.25	-1377	811.5	5092.38	3400.66	220.5	3518.88	866.344	2837.88	0	1968.75
9.9279	1661	1381.62	364.312	5649.44	738.375	612.812	2023.12	-500.781	1794.5	3882.19	3295.69	811	2902.62	719.375	2625	811.875	1637.47
9.9277	1700.06	1031.81	183.188	7438.31	265.531	1156.56	694.688	173.562	1864.5	3673.06	3142.5	875.375	2582.44	690.969	1699.5	1516.44	1428.94
9.9275	1049.56	749.531	606.25	9102.69	0	1512.5	-390.812	258.438	2027.25	5302.19	2822.16	135.688	2408.69	571.562	437.125	1238	1390.16
9.9273	239	438.25	1799.5	10310.2	0	1078.06	-510.188	-170.344	2671.38	6749.56	2495.75	-287.688	2919.38	340.156	172.75	97.375	1437.16
9.9271	-350.5	201.266	3326.38	11083.5	0	188.812	93.875	-582.375	3302.25	6063.62	2174.53	253.938	4892.44	279.156	1248.62	0	1487.56
9.9269	-1183.88	240.531	4695.31	11660	0	-17.5	642.875	-537.062	3551.12	4486.44	1687.09	842.125	7669.81	683.25	2286.5	0	1585.62
9.9267	-2360.06	483.969	5753.25	12289.6	64.0312	1116.31	788.625	-154	3678	4653	1168.28	672.75	8985.25	1517.06	2184	0	1867.75
9.9265	-2857.62	601.172	6391.56	12722.8	96.375	2738.75	691.375	117.344	3990.88	6491.56	1084.84	554.875	7338.56	2450.09	1784.88	768	2393.31
9.92631	-2184.62	472.469	6290	12074.4	98.1562	3384.88	458.75	131.688	4333.12	7305.44	1551.94	1421.25	3992.75	3199.91	2488.38	421.75	3007.44
9.92611	-1661.31	348.922	5319.62	9916.5	185.719	2825.31	-8.1875	186.312	4372.88	5939.75	2029.16	2392.94	1657.31	3750.38	3964	0	3402.94
9.92591	-2572	404.047	3922.38	7414	492.688	2134	-716.312	468.719	4069	4477.38	1981.94	2011	1453.31	4207.44	4556.75	0	3378.75
9.92571	-4018	410.828	2738.94	6368.81	1040.66	1858.75	-1451.38	670.031	3599.62	4988.75	1533.97	751.562	2205.56	4514.94	3664.5	0	3058.94
9.92551	-4307.62	70.1719	2083.44	6925.81	1730.81	1304.69	-1940.94	403.844	2998.12	6649.5	1170.84	427.375	2655.19	4434.66	2415.25	0	2811.34
9.92531	-3609.62	-569.734	2009	7275.25	2482.44	95	-2056.88	-163.969	2122.62	7464.25	1073.44	1299.62	3053.88	3875.19	1903.75	0	2922.28
9.92511	-3238.12	-1239.36	2463	6093.62	3296.47	-793.125	-1966.94	-438.812	1020.88	7255.12	1098.06	1758.69	4010.56	3159.91	1937.5	0	3381.16
9.92492	-2949.25	-1789.45	3002.25	4265.25	4110.16	-475.75	-2055.75	-132.688	123	7133.75	1214.56	1115.94	4904.5	2801.94	1928.25	0	3969.47
9.92472	-1271.25	-2181.69	2860.5	3493.12	4663.03	336	-2423.38	429.75	-131.875	7039.38	1543.66	737.5	4573.38	2981.09	2037.38	0	4460.22
9.92452	1625.19	-2337.59	1911.5	4104.69	4650.25	422.938	-2493.94	811.781	176.125	5916	2002	1655.88	3094.25	3392.78	2707	0	4692.88
9.92432	3741.56	-2275.39	1187.62	5090.94	4023	-86.5625	-1563.81	970.25	547.625	4079.88	2283.81	2825.75	1795.88	3686.03	3629.88	0	4588.31
9.92412	4238.19	-2260.98	1740.62	5589.19	3040.38	-202.438	167.25	1085.34	753.875	3378.94	2264.19	2935.75	1610.38	3876.09	3977.12	0	4228.56
9.92392	4429.75	-2536.97	3248.44	5409.19	2018.97	141.625	1633	1142.5	1118	4562.25	2151.91	2542	2284.06	4166.84	3472.12	0	3867.84
9.92372	5264.06	-2975.66	4464.75	4692.75	1141.34	210.562	2213.38	1000.38	1895.88	6080.75	2149.09	2925.38	3187.19	4506	2644.25	0	3728.31
9.92353	5931.19	-3245.44	4822.25	3997.44	513.219	92.5625	2479.19	766.531	2715.75	6238.69	2186.66	3775.62	4029.38	4570.16	2045.88	850.312	3792.91
9.92333	5817.56	-3248.69	4784.75	4210.94	229.5	664.625	3228.94	745.938	3009.5	5315.5	2140.84	3578.5	4642.19	4176.84	1684.12	1422.56	3896.44
9.92313	5813.94	-3153.38	4752.81	5449.12	261.312	1824	4297.62	946.375	2720.5	4648.12	2159.72	1836.88	4889.12	3510.53	1300.75	1399.31	3985.53
9.92293	6470.69	-3057.91	4565	6531.31	388.938	2200.81	4928.94	919.594	2098.12	4545.25	2569.66	-461.625	5100.56	2909.47	858.375	947.312	4152.62
9.92273	6596.5	-2889.08	4208.69	6505.38	398.25	1091.12	4951.88	266.688	1063	4211.38	3439.66	-2291.94	5872.38	2577.16	585.25	372.062	4421.69
9.92253	5128.19	-2619.52	4127.19	6133	308.938	-480.875	4807.31	-865.938	-515	3232.06	4338.69	-3217.12	7030.5	2506.22	710.625	78.625	4657.78
9.92233	3002.56	-2357.02	4447	6694.06	300.562	-1157.62	4540.38	-1960.81	-1995.88	2066	4614.41	-2796.62	7485.56	2511.88	1239	427.562	4734.09
9.92213	1686.44	-2208.05	4569.06	7801.56	454.688	-728.875	3605.88	-2664.62	-2298.88	1208.75	3974.28	-816.188	6709.31	2319.72	1875.88	1526.5	4649.62
9.92194	1028.75	-2218.41	3982.12	7848.75	672.719	267.75	1843.12	-2962.94	-1326.75	743.812	2802.62	1679.25	5794.12	1810.53	2177	3092.56	4403.44
9.92174	141.688	-2404.17	3045.31	6449.5	790.062	1428	-45.125	-2934.78	-339.75	728.188	1845.62	2846.81	6218.44	1248.34	1967.88	4489.94	3873.47
9.92154	-551.188	-2664.94	2546.56	4915.38	634.438	2329.38	-1271.88	-2610.34	-475.5	1234.31	1535.78	2078.88	7771.31	1099.88	1658.12	5021.19	2954.84
9.92134	124.125	-2757.17	2736.38	4190.38	34.875	2419.19	-1642.06	-2109.16	-1446.25	1814.25	1669.25	734.25	8566.19	1531.84	1877.88	4413.62	1785.53
9.92114	2026.19	-2586.67	3111.81	3826.44	0	1833.56	-1150.75	-1691.62	-2168.12	1586.38	1774.56	364.062	7280.62	2222.75	2662	3143.44	730.5
9.92094	3768.44	-2430.59	3054.88	3437.5	0	1560.62	390.25	-1539.84	-2167.88	289.625	1690.84	933.312	4722.19	2753.56	3239.38	2172.94	107.031
9.92074	4604.56	-2565.3	2555.56	3711.75	0	1968.31	2651.44	-1592.59	-1768.75	0	1664.91	1313.19	2803.62	3024.22	2929.5	2174.38	-72.2188
9.92055	4901.12	-2734.11	2338.94	5131.56	0	1918	4215.5	-1688.19	-1282.62	0	1950.19	910.438	2424.19	3163.31	2102.38	2947.56	-109.062
9.92035	4918.5	-2368.47	3146	6773.06	0	374.25	3725.5	-1778.59	-777.25	978.75	2491.09	150.188	2896.88	3202.44	1853.88	3662.56	-366.562
9.92015	4376.25	-1388.75	4721	7381.88	0	-1662.88	1668.62	-1911.97	-533.5	3754.81	3032.56	-297.5	3256.06	3071.12	2691.5	3687	-944.812
9.91995	3227.06	-399.891	5772.88	6998.56	0	-2075.31	149.812	-2092.66	-970.75	5718	3404.88	-126.312	3444.62	2845.19	3910.38	3095.5	-1596.44
9.91975	1864.38	70.4688	5289.5	6696.81	0	-346.812	517.625	-2283.59	-1880.5	6132.12	3629.59	662.312	3957.25	2748.28	4432	2361.69	-2021.31
9.91955	581.75	198.969	3650.44	7207.75	0	1754.12	1880.5	-2511.66	-2227.12	5630.25	3832.97	1896.88	4801.56	2852.06	3943.38	1710	-2227.72
9.91935	-393.75	500.781	2054.19	8484.56	393.906	2365	2506.06	-2853.56	-1112.5	5293.88	4123.97	3200.44	5365.88	2952.28	2976.88	931.562	-2486.41
9.91916	-569.312	1091.33	1192.44	10106.1	996.25	1491.25	2097.12	-3295.88	1161.75	5401.12	4494.78	4072.69	5229.44	2844.38	2133.75	0	-2919.28
9.91896	261.5	1598.95	1020.69	11350.3	1449.06	485.312	1798.81	-3672	3199.88	5312.62	4770.44	4158.94	4627.44	2604.62	1568.62	0	-3300.5
9.91876	1411.38	1687.05	1392.62	11285.9	1570.78	307.312	2210.38	-3766.91	3696.88	4564.06	4701.44	3470.06	4035.31	2465.47	1129.5	0	-3351.72
9.91856	2117.31	1408.2	2050.94	9639.81	1470.78	776.688	2530.12	-3488.75	2530.38	3624.06	4193.84	2408	3674.88	2471.28	696.625	0	-3076.84
9.91836	2616.25	1076.69	2244.31	7444.81	1399.09	1155.12	2022.19	-2970.5	786.125	3234.94	3458.16	1559.5	3529.06	2423.38	362.5	0	-2649.97
9.91816	3444.88	960	1385.5	6187.38	1482.88	1047.88	1358.06	-2513.09	-223.375	3308.06	2883.06	1294.25	3453	2213.56	376.75	0	-2100.66
9.91796	4109.19	1074.41	87.5625	6384.56	1625.97	791.125	1656.69	-2372.34	0.5	3027.06	2735.66	1479.81	3142.62	2065.44	797	0	-1342.72
9.91776	3694	1175.88	0	7461.75	1645.12	1049.25	2726.12	-2554.34	942.75	2048.81	2978.84	1672.38	2457.88	2288.84	1191.88	0	-487.75
9.91757	2520.62	984.25	0	8751.75	1465.38	1984.31	3270.25	-2832.56	1740.12	1058.56	3358.12	1603	1963.69	2838.97	1046.5	196.062	114.5
9.91737	1802.94	477.219	0	9915.44	1197.03	2969.38	2735.06	-2959.72	1957	873.438	3634.72	1370.81	2546.31	3306.66	600.75	348.625	239.562
9.91717	1722.12	-102.281	0	10483.2	1077.28	3300.69	1967.62	-2815.09	1790.62	1398.94	3741.38	1186.69	4074.75	3401.66	731.75	418.062	44.7188
9.91697	1326	-549.969	0	9837.88	1315.12	2925.56	1808.19	-2388.06	1665.25	1903.31	3752.06	1116.19	5070.94	3273.22	1604.12	693.375	-137.375
9.91677	491.312	-871.25	1226.06	8037.94	1900.56	2146.38	1909.56	-1756.34	1688.75	2124.62	3745.88	1130.69	4404.12	3225.75	2065.62	1479.25	-167.969
9.91657	402.375	-1111.12	3316.69	6170.12	2544	987.875	1498.56	-1103.25	1570.25	2545.31	3712.12	1270.19	2824.19	3280.09	1153.62	2529.31	-171.562
9.91637	1570.62	-1231.44	4275.62	5394.5	2895.88	-533.438	662.438	-596	1176.12	3443.44	3565	1676.69	1948.5	3233.81	-289.75	3150.12	-302
9.91618	2858.38	-1292.66	3745.94	5736.81	2875.66	-1785.94	139.688	-175.219	1029.62	4178.56	3221.56	2493.69	2107.94	3068.16	-582.875	3103.19	-539.406
9.91598	3268.75	-1538.67	2701.25	6120.56	2722.59	-2002	156.625	382.094	1809.62	3879	2679.41	3678.81	2303.38	3008.22	422.875	3011.62	-703.656
9.91578	3391.25	-2059.77	2137.69	5587.25	2693.69	-1372.56	250	1102.41	3215.5	2632.31	2065.25	4826.12	2155.06	3151.94	1180	3460.06	-601.594
9.91558	4059.19	-2510.55	2356.75	4252.31	2804.72	-833.312	234.062	1708.81	3886.62	1453.94	1602.19	5299.75	2528.38	3315.34	780.125	3979.94	-147.188
9.91538	4731.75	-2447.42	3035.88	2982.69	2925.44	-636.5	673.438	2024.66	2928.62	1027.25	1445.44	4782.5	3829.75	3365.78	167.75	3515.88	626.938
9.91518	4505.88	-1897.19	3366	2378	3021.66	-29.75	2127.88	2274.28	1122.12	1002.25	1505.12	3696	4941.31	3480.53	531.125	1867.38	1624.78
9.91498	3885.19	-1311.89	2596.06	2386.44	3180.97	1313	4267.25	2719.81	18.125	768.5	1513.72	2870.62	4742.38	3884.34	1680.12	119.688	2683.53
9.91479	4061.12	-942.406	1074.56	2853.31	3452.91	2478	5994.12	3151.81	146.125	390.75	1367.91	2742.88	3863.88	4480.66	2762.12	0	3498.5
9.91459	4867.75	-537.422	301.25	3906.5	3790.5	2585.81	6374.44	3099.59	820.875	315.375	1342	3020.31	3878.81	4949.69	3504.62	96.625	3690.56
9.91439	4949.81	215.031	1278.81	5428.25	4136.47	2112.69	5427.62	2536.69	1433.38	570	1809.66	3164	5129.38	5120.81	3783.75	1127.81	3137.47
9.91419	3941.88	1153.42	3185.81	6545.62	4450.72	2056.12	4092.12	2029.91	1946.75	903.875	2750.44	3022.31	6336.44	5047.19	2959.12	1758.25	2238.94
9.91399	3095.69	1738.42	4290.81	6337.81	4639.91	2325.62	3347.19	2084.53	2122.5	1465.62	3702.97	2884.5	6293.38	4778.22	942.25	1821.56	1662
9.91379	3384.56	1602.33	3800.94	5056.5	4581.22	2043.44	3277.19	2598.56	1364.12	2564.75	4275.94	2999.88	5148.56	4297.5	-750.625	1710.81	1728.34
9.91359	4088.06	853.125	2239.19	4025	4293.09	1244.56	3162.81	3081.12	-265.5	3818.25	4535.62	3191.25	3908.31	3712.72	-481.875	1883.94	2164.69
9.91339	3866.75	-127.625	490.938	4122.75	4017.19	1111.62	2584.56	3186.31	-1739.38	4367	4738.12	3027.94	3307.06	3302.25	1258.38	2424.38	2514.62
9.9132	2515.69	-1028.12	0	4890	4026.59	2263	2038.56	2901.56	-2267.5	4069.44	4832.72	2403.12	3408.88	3272.75	2447.75	3049.38	2631.38
9.913	1030.88	-1699.97	0	5404.62	4328.44	3752.31	2098	2412.31	-2094.75	3663.5	4510.12	1833.19	3914.81	3574.81	2227.25	3550.69	2639.97
9.9128	364.75	-2047.25	0	5490.62	4616.41	4277.12	2379.94	1955.31	-1654.75	3530	3746.12	1994.44	4538.19	4023.91	1581.88	4006.62	2589.66
9.9126	618.875	-1998.05	96.375	5542.19	4581.44	3697.81	2030.69	1684.72	-762.5	3245.38	3011.22	2936.69	5139.75	4502.28	1318.5	4364.56	2388.84
9.9124	1167.12	-1626.27	46.4375	5550.81	4253.53	2739.56	1053.44	1547.22	647	2802.38	2775.41	3959.62	5588.69	4960.56	953.625	4164.06	2028.84
9.9122	1168.88	-1181.77	0	5089.25	3952.28	1706.56	345.312	1382.38	1702.12	3187.56	2967.78	4347.88	5563.56	5302.66	94.375	3188.19	1633.78
9.912	217.625	-881.125	0	4299.69	3875.53	329.812	336.625	1212.69	1499.62	4813	3117.12	4010.75	4742.88	5394.75	-507.375	2138.5	1275.19
9.91181	-1121.25	-700.422	666.75	4214.56	3867.31	-1216.94	416.188	1282.75	456.75	6248.06	2939.56	3288.19	3366.12	5203.81	-132.375	1928.69	949.094
9.91161	-1612.94	-472.953	1397.56	5657.5	3717.69	-1965.81	11.9375	1716.38	-178.625	5838.12	2580.97	2442.69	2340.5	4874.59	717.75	2367.25	774.188
9.91141	-572.688	-152.938	1714.12	8091.31	3576.81	-1177.62	-520.688	2300.25	-2	4160.88	2302.5	1653.69	2411	4642.06	1214	2384.06	986.125
9.91121	1331.19	160.266	1896.5	9981.69	3811.66	655	-605.438	2729.16	252.375	3439	2147.59	1303.25	3267.12	4660.62	1457.62	1683.69	1616.88
9.91101	2803.5	450.656	2171.88	10326.8	4422.56	2191.5	-417.5	2905.62	96.75	4515.06	1999.25	1808	3780.19	4886.28	1953.38	1217.62	2351.25
9.91081	3276.88	847.422	2392.38	9559.69	4884.38	2522.62	-481.625	2865.16	83.375	5809.5	1807.47	3066	3183.88	5102.69	2499.38	1645.88	2849.88
9.91061	3157.5	1373.22	2402.75	8872.5	4745.16	1851.94	-726.188	2584.75	890	5650.06	1627.03	4306.12	1854.31	5084	2556.62	2328.38	3096.47
9.91042	2892.31	1779.33	2166.06	8915.12	4182.53	983.25	-669	2061.41	2220	4341.31	1492.91	4633.62	901.812	4781.34	2241.75	2513.69	3295.16
9.91022	2414.06	1762.94	1587.88	9369.12	3719.38	394.5	-302.062	1450.81	3091.75	3193.56	1369.88	3764.06	1107	4369.22	2053.12	2578.06	3549.22
9.91002	1657.56	1282.08	765.938	9603.31	3508.44	-65.75	-52.5625	929.75	2977.88	2551.75	1217.41	2339.25	2268.25	4096.62	1999.75	3068.94	3812.91
9.90982	1062.81	580.906	247.875	9351.38	3207.69	-682.438	59.5	521.5	2294.38	1836	1046.66	1562.12	3540.62	4072.81	1861.25	3270.94	4064.41
9.90962	1140.75	-13.6719	363.438	8693.94	2569.69	-1286.19	505.5	234.938	1820.25	918.75	918.562	2261.31	4377.31	4205.41	1936.12	2078.44	4318.75
9.90942	1810.88	-263.625	426.875	7756.06	1848.62	-1304	1396.19	242.469	1902.38	303.188	894.938	4073.25	5010.94	4367.56	2569.62	4.25	4507.69
9.90922	2557.81	-124.938	0	6698.12	1464.31	-403.562	2162	662.375	2321.5	79	949.938	5671.25	5890.31	4596.16	3206.62	0	4543.91
9.90902	3054.19	201.703	0	5845.12	1445.59	1031	2300.69	1224.44	2757.88	0	931.625	6006.44	6886.94	5044.09	2975.88	0	4490.03
9.90883	3231.19	423.281	0	5551.12	1413.31	2200.19	1982.25	1422.28	3086.12	0	708.812	5224.31	7476.38	5705.22	2168.75	1179.81	4457.16
9.90863	2898.44	453.484	0	5885	1071.84	2676.5	1665.06	1038.75	3155.62	0	390.5	4253.81	7582.88	6296.81	2086.38	1990	4326.25
9.90843	1850.94	445.156	0	6470.44	560.344	2794.5	1465.06	344	2700.38	0	273.375	3770.81	7632.19	6542.34	3240.88	2169.94	3808.31
9.90823	443.812	443.297	0	6634	280.469	3193.94	1147.06	-244.469	1837.38	55.3125	477.75	3835.19	7678	6531.12	4644.25	2500.75	2871.12
9.90803	-426.938	213.094	174.562	5882.81	466.844	4040.62	515.5	-542.062	1323.75	920.875	765.281	4254.25	7175.94	6621.62	5187.12	3082.88	1894.16
9.90783	-198.062	-378.484	1474.5	4493.56	994.844	4794.62	-343.5	-633.969	1697.12	929.438	879	4833.69	5954.69	6942.88	4885.38	3365.94	1261.28
9.90763	769.5	-982.344	2006.62	3500.38	1579.91	4734.25	-1025.56	-700.688	2324.88	299.312	957.906	5321.19	4723.12	7139.53	4365.5	3114.75	974.312
9.90744	1668.38	-1082.25	1705.38	3667.75	2056.75	3632.06	-985.5	-844.625	2054.38	0	1356.91	5477.88	4054.31	6722.75	3877.88	2633	829.688
9.90724	2063.25	-656.812	1276.62	4527.31	2393.94	1929.12	-57	-986.188	821.375	0	2054.53	5218.81	3466.69	5603.75	3361.62	2223.5	805.062
9.90704	2016.31	-244.969	1598.56	4972.06	2528.03	374.25	1143.5	-933.062	-181.875	383.312	2529.06	4488	2277.56	4203.91	2911.38	1918.62	1040.16
9.90684	1662.38	-320.766	2829.06	4811.56	2382.19	-446.188	1689.94	-648.781	-75.25	1421.94	2369.84	3194.31	923	3117.5	2603.62	1632.56	1545.22
9.90664	1002.75	-830.812	4313.06	4984.75	2091.56	-361.375	1371.5	-398.875	836.5	2652.31	1797.5	1637.31	469.812	2731.94	2288.88	1291.75	2198.28
9.90644	54.1875	-1388.7	5204.75	6018.94	2015.34	379.25	914	-480.875	1994.88	3910.06	1366.38	762.75	987.5	3055.72	2061	957.812	2980.47
9.90624	-1031.69	-1696.62	5085.31	7144.44	2380.75	1277.75	994.938	-838.219	3389	4870.94	1295.75	1367.38	1415.38	3743.22	2482.38	954.562	3914.53
9.90605	-1989.62	-1691.06	4234.62	7467	3027.19	1868.94	1381.81	-1096.25	4890.5	5144.69	1358.91	2967.12	1177.19	4300.44	3714.25	1572.06	4739.16
9.90585	-2509.81	-1468.38	3441.81	7209.19	3631.72	1969	1330.75	-967.125	5755.5	4691.69	1360.34	4013.44	981.875	4401.88	4793.75	2493.56	4970.44
9.90565	-2443.69	-1194.95	3334.06	7053.62	4058.97	1711.56	587.688	-485	5627.25	3939.38	1391.56	3529.44	1628.94	4059.44	4551.75	2910	4453
9.90545	-2036.75	-997.438	3765.5	6968.5	4324.97	1366.56	-336.5	111.875	5316.12	3309.06	1536.56	2220.88	2777.38	3486.25	3147	2452.94	3605.97
9.90525	-1738.69	-882.344	3996.56	6610.31	4367.62	1148.5	-764.625	558.375	5678.88	2778.31	1631.75	1688.75	3449.62	2889.59	1935.88	1647.12	2905.06
9.90505	-1651.56	-831.031	3484.75	6325.69	4119.34	1168.81	-476.375	670.406	6251.5	2102.25	1540.12	2709.62	3219.81	2466.25	1709.62	1181.81	2318.47
9.90485	-1438.5	-918.828	2375.12	6687.5	3728.81	1451.19	190.25	495.344	5900.12	1344.06	1466.84	4491.56	2334.06	2453.66	1761.12	1119.62	1544.78
9.90465	-951.188	-1162.88	1325.69	7403.94	3406.94	1866.81	704.812	356.75	4411.25	926.875	1703.34	5542.25	1090	2957.47	1045.62	1118.25	684.094
9.90446	-586.25	-1289.98	1006.19	7740.81	3052.31	2076.69	899.375	544.438	2572.88	1151.38	2119.91	5129.19	-215.125	3721.66	-270.875	1017.5	281.375
9.90426	-713.312	-927.188	1536.94	7732.38	2338.03	1710	1227.31	957.031	1067.5	1873	2217.19	3890.94	-938.125	4239.84	-987.625	826.688	622.312
9.90406	-1121.06	-98.0938	2193.69	7890.75	1236.84	736.188	2250	1263.41	171	2745.12	1741.28	3057.19	-444	4156.62	-417.375	503.25	1295.44
9.90386	-1464.81	701.078	2034.44	8003.38	175.406	-400.312	3751.38	1398.28	179.5	3658.06	985.094	3165.06	1067.62	3500.5	793	169.188	1651.16
9.90366	-1891.44	1024.41	1182.69	7441.12	0	-1167.69	4656.88	1603.22	1145.25	4754.81	344.344	3703.88	2629.25	2577.66	1542.25	216.438	1519.31
9.90346	-2606.69	873.812	987.438	6481.19	0	-1454.12	4087.25	1928.62	2377.25	5938.94	-186.438	3951.5	3638.56	1770.84	1609.75	743.938	1275.66
9.90326	-3122.19	494.938	2270.19	5982.06	0	-1516.19	2301	2046.09	3101.5	6511.75	-827.594	3737.81	4562.56	1386.22	1743.88	1192.25	1322.03
9.90307	-2772	37.0625	3903.31	5805.81	0	-1418.88	365.125	1738.59	3445.12	5622.31	-1472.28	3220.94	6204.38	1478.62	2487.62	1037.81	1737.41
9.90287	-1931.19	-414.672	4077.88	5050.62	0	-834.625	-901.938	1276.41	3923.88	3272.69	-1678.28	2412.5	8471.19	1796.62	3366.88	600.375	2404.31
9.90267	-1811.88	-703.719	2681.38	3966.75	0	379.062	-1434.31	1029.78	4250.38	678.125	-1257.16	1383.12	10205.9	2073.47	3560.62	617.875	3231.12
9.90247	-2803.38	-744.062	1281.5	3985.69	343.688	1648.81	-1632.25	914.969	3718.25	0	-596.188	594.562	10260.9	2377.72	3129.5	1191.38	4145.66
9.90227	-3822.25	-669.062	825.688	5377.75	953.969	2112.94	-1919.12	550.406	2643.62	0	-221.531	493.188	8563.5	2948.06	3032.12	1707.38	4994.88
9.90207	-3719.81	-640.953	666.062	6533.06	1846.56	1513.69	-2404	-134.344	2266.5	433.375	-207.75	968.375	6121.38	3654.94	3819.75	1721.19	5564.25
9.90187	-2629.5	-636.391	155.188	6373.25	2591.44	299.625	-2654.5	-769	3061.38	1158.69	-231.844	1649.12	4144.62	3938.38	4804.75	1388.25	5684.62
9.90168	-1421.25	-599.5	0	5946.81	2715.84	-1098.31	-1995.19	-1024.12	4111.12	1463.56	-123.906	2423.38	3217.69	3453.84	4859.75	1056.38	5330.81
9.90148	-519.438	-653.984	566.938	6569.31	2332.47	-2583.88	-412.625	-949.125	4365.5	1679.12	-95.375	3149.06	3146.88	2525.41	3732.5	946.062	4689.88
9.90128	37.6875	-939.266	1726	7757.75	2033.41	-3893.94	1022	-771.156	3686.75	2007.5	-340.125	3299.75	3397.75	1738.28	2191.25	1235.56	4109.12
9.90108	-7.5625	-1363.14	2320.31	8319.12	2140.09	-4408.81	1129.38	-592.156	2516.88	2298.44	-614.062	2716.56	3619.31	1296.78	1115.38	1934.5	3822.81
9.90088	-687.812	-1752.75	2168.94	8305.31	2352.06	-3905.62	-49.3125	-415.406	1374.75	2296.38	-439.375	2344.19	3818.12	1057.81	877.5	2583.94	3667.38
9.90068	-1074.69	-2120.88	1889.62	8351.81	2228.59	-3067.25	-1376.69	-305.875	844	2001.12	273.812	3138.12	4121.44	993.188	1414.62	2573.38	3202.53
9.90048	-105.5	-2505.39	1861.31	8003.5	1777.62	-2668.88	-2007.94	-344.094	1165.62	1897.75	990.219	4376.56	4482.81	1231.09	2341.12	1929.88	2214.81
9.90028	1784.19	-2666.38	1954.62	6453.81	1413.19	-2513.75	-2072.38	-469.312	1598.25	2691.62	1059.5	4316.44	4740.5	1703.16	2999.38	1380.56	993.25
9.90009	2863.38	-2313.41	1996.25	4453.12	1466.34	-1829.5	-1912.12	-521.719	1047.25	4455.62	401.938	2690.31	4966.19	2140.03	2945.38	1433.56	-1.21875
9.89989	2267.88	-1627.03	1894.06	3731.62	1882.84	-641.188	-1364.06	-466.938	-364.75	6160.19	-439.656	1222.56	5558.44	2472.44	2478	1764.69	-616.219
9.89969	1090.94	-1185.06	1501.75	4596.88	2348.78	-40.875	-216.875	-477.031	-1149.38	6610.94	-901.594	1165.94	6796.06	2915.38	2205.25	1754.69	-996.625
9.89949	824.875	-1270.41	812.375	5626.75	2610.97	-884.125	1088.5	-714.188	-224	5882.31	-867.312	1640.88	8341.56	3560.16	2024.12	1314.88	-1208.94
9.89929	1495.25	-1551.84	120.5	5823.94	2668.25	-2735.19	1744.5	-1080.41	1858.25	5165.62	-479.25	1308.62	9388.31	4167.06	1150.12	866.688	-1136.66
9.89909	2066.81	-1586.2	0	5642.06	2682.59	-4390.31	1381	-1274.03	3718.5	5060.62	266.188	552.875	9373.94	4501.47	-604.75	714.5	-756
9.89889	2116.56	-1373.67	0	5639.19	2735.75	-5088.81	261.062	-1101.19	4490.88	4832.19	1446.78	735.312	8473.75	4641.75	-2241.75	796.25	-272.875
9.8987	2149.81	-1235.55	311.875	5536.56	2736.22	-4940.12	-1067.25	-642.812	4107.25	3762.06	2799.69	2010	7375.12	4809.34	-2740.38	985	102.25
9.8985	2470.12	-1342.38	1281.31	5197.38	2587	-4453.25	-1939.31	-85.9375	3020.25	2379.88	3719.22	3258.12	6645.31	5084.88	-2293.88	1264.44	342.281
9.8983	2691.31	-1563.77	2017.5	5359.94	2350.03	-3963.19	-1684.31	490.375	2017.5	1583.38	3823.28	3869.56	6319.44	5427.94	-1824.62	1480.25	491.625
9.8981	2499.69	-1667	1766.62	6554.69	2173.16	-3415.25	-172.438	1061.03	1692.38	1185.19	3344.47	4229.25	6005.62	5784.59	-1687.88	1234.19	556.125
9.8979	2129.19	-1500.38	797.312	8032.38	2144.94	-2552.88	1757.88	1489.84	1834	326.188	2816.94	4417.44	5353.5	6026.78	-1520.38	393.812	618.094
9.8977	1821.69	-1061.3	258.125	8608.81	2311.66	-1374.06	2934	1596.47	1909	0	2519.88	3714.56	4461.69	5959.91	-1045.62	0	873.531
9.8975	1472.81	-504.672	622.75	8179.31	2722.75	-331.75	3025.06	1381.69	2121.75	0	2370.38	1844.5	3822.88	5544.31	-250.75	0	1374.03
9.89731	1174.88	-15.0938	1194.25	7702.56	3308.53	160.688	2684.56	1042.75	3065	0	2202.97	-196.875	3833.56	4959.84	1017.62	1474.94	1856.22
9.89711	1502.94	397.953	1534.56	7887.5	3793.44	322.938	2462.94	756.5	4237.88	0	1933.09	-1158.44	4389.25	4335.28	2761.75	2956.69	2005.28
9.89691	2692.12	866.766	2208.75	8490.06	3898.28	707.5	2169	568.094	4175	0	1540.75	-913.812	4974	3628.75	4145.12	3379.25	1795.5
9.89671	3910.62	1367.84	3382.88	8898.75	3585.38	1392.31	1643.38	478.875	2525.12	843.5	1140.16	-389.312	5079.69	2932.03	4045	3298.94	1410.69
9.89651	3985.75	1627.58	3931.94	8949.19	2968.25	2030.75	1561.38	480.469	782.25	1750.5	1034.69	-405.812	4552	2627.16	2550.12	4039.25	955.406
9.89631	2737.75	1451.58	3098	8965.56	2082.34	2654.56	2674	486.406	216.625	1189.38	1447.78	-908.5	3710.69	2958.47	1105.25	5605.56	471.781
9.89611	1106.06	995.547	1989.19	9208.88	964.594	3600.56	4403.69	404.125	231.125	0	2165.94	-1190.62	3181.62	3634.66	811	6519.56	148.344
9.89591	37.9375	553.047	2017	9553.94	0	4444.44	5072.19	312.688	-279	0	2680.22	-684.25	3380.62	4152.34	1297.5	5983	221.031
9.89572	-300.75	214.469	2671.38	9758.31	0	4033.81	3862.94	386.812	-1007.75	0	2758.47	438.5	4056.06	4355.53	1676.25	5024.56	647.688
9.89552	-294.938	-78.0625	2428.69	9823.06	0	2220.06	1951.31	600.531	-934.75	0	2669.53	1494.75	4582	4367.56	1811.12	4821.56	1113.59
9.89532	-364.375	-279.25	1255.19	9883.06	0	620.938	1186.94	734.5	-184.75	2023.38	2745.31	2180.38	4780.62	4165.53	2019.88	4992.12	1393.25
9.89512	-701.312	-318.188	475.625	9916.31	0	644.312	2053.25	788.875	154.875	3285.56	2941.34	2955.38	5075.56	3671.53	2198.12	4633.38	1505.41
9.89492	-1075.94	-381.719	508.75	9901.25	241.344	1440.56	3498.12	1142.5	-375.25	3853	3004.22	4237.81	5695.12	3182.25	2063.62	4125.81	1505.09
9.89472	-875	-821.672	539.438	10069.2	297.25	1088.5	4461.31	2076.56	-1421	4246.94	2896.19	5527.25	6300.31	3187.81	1839	4417.5	1377.91
9.89452	203.375	-1684.67	318.875	10451.2	168.625	-559	4774.19	3301.06	-2805.38	4565.19	2815.59	5879.12	6750	3669.59	1882.38	5038.56	1196.59
9.89433	1468.69	-2530.98	439.938	10294.9	82.625	-1656.94	4575.62	4205.16	-4373.25	4567.56	2876.06	5128.62	7529.75	4013.69	1965.5	4534.81	1119.34
9.89413	1821.12	-2850.41	736.312	8783.62	354.375	-1027.5	3725.75	4482.19	-5104.62	4029.94	3001.91	4049.12	8733.69	3773.25	1716.88	2851.56	1128.88
9.89393	1188.44	-2559.25	344.438	6520.75	978.656	383.875	2240	4260.56	-3890.25	3013.12	3133.06	3303.19	9310.56	3135.59	1477.75	1614.94	1024.69
9.89373	776.625	-2001.53	0	5387.81	1564.25	1114.12	746.312	3698.09	-1357.88	2035.5	3324	2841.31	8398.94	2474.53	1812.12	1695.88	809.25
9.89353	1542.62	-1552.11	432.375	6424.62	1814.25	977.5	-7.4375	2781.69	417.125	1756.69	3592.19	2448.62	6949.5	1845.44	2353.38	2065.62	822.062
9.89333	2961.94	-1321.55	2551.12	8607.69	1866.28	603.938	163.625	1600.09	424.375	2171.56	3830.09	2268	6662.31	1187.06	2166	1735	1290.72
9.89313	3806.25	-1200.16	3729.62	10247.1	2007.88	275.062	989.062	522.438	-190.625	2442.62	3933.78	2488.25	7454.81	682.062	1261.25	1349.5	1972.44
9.89294	3680.5	-1070.62	2621.38	10770.3	2281	88.1875	2138.69	-105.156	-6.125	1980.38	3897.44	2966.69	7530.69	581.281	690.25	1801.25	2478.75
9.89274	3149.81	-923.281	1095.25	10459.4	2576.44	431.375	3157.31	-320.906	846.75	1356	3730.5	3471.31	6202.62	873.375	894.875	2440.06	2756.78
9.89254	2663.94	-787.016	1567.88	9391.81	2913.94	1315.81	3483.56	-432.594	1462.62	1516.62	3427.72	3952.25	4994.81	1385.34	1012.38	2029.06	2972.03
9.89234	2144.25	-614.828	3517.75	7753.19	3342.59	1843	3098.56	-607.062	1779.5	2343.06	3123.47	4318.81	5220.5	1998.47	315.375	793.688	3084.09
9.89214	1584.69	-319.641	4542.19	6518.94	3681.94	1325.69	2776	-749.25	2343.5	2793.31	3144.56	4307.69	6022.75	2541.28	-580.625	166.312	2896.81
9.89194	1288	64.8594	3948.06	6545.81	3666.75	487.25	3018.56	-792.531	2983.12	2480.44	3716.34	3896.69	6037.06	2748	-660.625	784.5	2474.44
9.89174	1293.44	364.719	3276.38	7322.06	3333.62	538.562	3073.81	-925.781	2849.38	2285.94	4611.41	3555.75	5751.19	2637.12	10.375	1915.38	2164.44
9.89155	1185.81	492.734	3642.44	7749.31	3014.78	1380.31	1858.81	-1391.88	1711.38	3117.88	5237.56	3735.75	6619.81	2684.91	527.375	2777	2165.25
9.89135	805.312	623.188	4465.81	7808.06	2921.78	1779.5	-280.375	-2126.84	331.5	4718.12	5161.66	4295.81	8559.19	3254.28	424.875	3390.94	2335.06
9.89115	660.188	1013.19	4937.75	8220.56	2929.06	1201.44	-1722	-2768.28	-565.125	6117.75	4521.62	4745.88	9977	4047.38	-47.375	4032.12	2467.97
9.89095	1191.69	1673.52	5141.44	8762.06	2801.59	403.25	-1626.81	-3059.31	-976.25	6805.62	3898.66	4861.62	10037.9	4496.88	-651.5	4671.5	2510.12
9.89075	1942.44	2338.77	5316.88	8383.88	2472.41	128	-884.25	-3105.25	-1088	7007.38	3800.47	4704.5	9395.44	4502.41	-1425.38	5150.75	2449.94
9.89055	1964.25	2763.98	5217.31	7076.38	2056.78	191.438	-608.812	-3148.12	-753.125	7148.69	4256	4178.5	8679.31	4343.47	-2285	5329.88	2251.44
9.89035	965.375	2934.58	4665.62	6202	1738.91	139.25	-582.125	-3235.66	54.375	7480.75	4847.47	3046.5	7679.5	4048.56	-2932.25	4984.81	2010.12
9.89015	-381.25	2974.38	3933.81	6660.56	1691.16	6.1875	102.25	-3278.47	765.875	8004.5	5099.22	1495.94	6344.25	3418.62	-3179	4067.81	1970.97
9.88996	-1291.88	2978.05	3288.5	7900.56	1979.44	81	1448.5	-3308.91	797.375	8364.19	4869.72	306.375	5389.12	2637.19	-2989	3055.69	2253.06
9.88976	-1612.44	2982.44	2829.44	9068.25	2472.28	506.125	2455	-3420.12	345.75	7988.12	4416.31	125.938	5365.44	2248.94	-2313.38	2528.38	2681.31
9.88956	-1528.94	2989.33	2839.88	9977.75	2902.62	1324.5	2386.19	-3479.91	17	6716.5	4089.88	674.938	5932.75	2389.31	-1254.25	2463.25	2974.94
9.88936	-921	2944.62	3507.12	10578.2	3062.25	2338.12	1473.56	-3214.16	-187.125	5176.56	3967.34	974.062	6525.75	2552.06	-275	2482.44	2982.06
9.88916	524	2777.7	4213.44	10640.6	2924.22	2817.5	419.25	-2655.69	-773.625	4194.69	3804.72	478.875	7101.44	2347.03	136.125	2663.25	2687.53
9.88896	2586	2526.03	3963.38	10494.4	2616.53	2108.06	-273.375	-2219.09	-1600	3950.56	3359.22	-236.188	7801.31	2051.94	-56.5	3374.06	2172
9.88876	4365.75	2343.19	2706.31	10942	2343.06	729.75	-483.562	-2148	-1704.88	4029.5	2714.09	-199	8401.06	2139.31	-551.125	4287.94	1662.09
9.88857	5120.62	2314.41	1445.06	11789.7	2283.91	27.9375	-408.875	-2119.81	-756.875	4138.5	2235.09	642.312	8542.75	2622.41	-1078.62	4384.31	1459.84
9.88837	4976.19	2335.2	827.938	11548.6	2466.56	383.438	-368.75	-1637.75	115.125	4307.94	2211.34	1240.88	8218.25	3170.38	-1355.25	3259.31	1686.66
9.88817	4513.5	2240.17	436.438	9452.88	2724.38	683.938	-448.562	-678.562	-256.625	4455.81	2577.53	774.688	7720.06	3571.97	-975.375	1800.06	2182.72
9.88797	3913.12	1970.25	0	6881.06	2829.81	122.25	-424.5	264.875	-1388.12	4322.94	2988.25	-224.125	7268.06	3771.19	151.375	1120.88	2719.34
9.88777	2992.94	1528.53	0	5820.69	2654.25	-464.25	-210.25	677.469	-1905.12	3989.19	3132.28	-478	6788.62	3691.56	1414	1266.31	3175.03
9.88757	1958.5	886.125	0	6600.31	2192.94	24.0625	-89.125	364.531	-1691.62	3956.69	2976.91	488.875	5979.06	3361.88	2016.62	1427.06	3447.66
9.88737	1433.62	112.672	0	8077.44	1546.81	1032.12	-147.375	-554.562	-1996.75	4413.44	2751.31	1902.81	4746.25	3046	1765.12	1150.81	3409.12
9.88718	1562.56	-446.391	0	9445.94	950.406	1071.62	212.438	-1715.91	-3252.62	4786.12	2709.38	2817.81	3702.56	2941.09	1003.88	835.75	3125.34
9.88698	1708.38	-371.5	0	10727	672.938	-43.375	1585.38	-2624.56	-4101.25	4385.06	2880.06	3123.25	3746.19	2878.25	82.25	1065.31	2963.94
9.88678	1427.75	336.656	0	11773.7	746.188	-1051.56	3451.75	-2972.66	-3286.62	3215.94	3045.19	3305.25	4723.75	2595.78	-612.25	1837.06	3243.78
9.88658	1202.81	1127.8	1912.06	11986.6	900.156	-1334.62	4396.25	-2891	-1535.75	1746.38	2992.5	3671.75	5120.31	2174.5	-482.875	2593	3814.06
9.88638	1676.69	1445.3	3232.69	11242.3	924.5	-1787.56	3673.62	-2736	-585.125	121.188	2768.66	4172.31	3904.69	1914.22	598	2841.75	4178.91
9.88618	2627.88	1331.47	3265	10339.4	957.344	-3137.38	2145.06	-2667.16	-899.5	0	2597.88	4707.19	2199.5	1903.72	1600.5	2565.88	4063.59
9.88598	3385.56	1303.44	2723.06	10155.5	1191.25	-4529.94	1351.69	-2614.78	-1349.88	0	2537.69	5188.06	1998.69	2032.84	1238.5	2031.81	3725.44
9.88578	3912.69	1638.3	2500.75	10691.9	1428.81	-4649.19	1882.62	-2575.31	-939.75	0	2346.81	5389	3448.62	2347.69	-347	1453.31	3660.5
9.88559	4615.5	2006.91	2882.12	11173.4	1273.56	-3583.44	2944.25	-2639.31	59.5	0	1803.16	5141.56	4681.69	3026.41	-1632	1065.56	4071.88
9.88539	5233.5	1928.86	3490.81	10953.1	736.719	-2647.5	3437.44	-2708.56	754.875	0	1067.81	4746.69	4416.69	3969.12	-1627.12	1310.25	4657.84
9.88519	4934.25	1410.38	3705.38	10192.7	282.312	-2564.12	3139.81	-2503.34	702.375	0	568.875	4842.88	3393.19	4734.03	-930.375	2427	4904.09
9.88499	3710.06	913.953	3221.56	9616.81	187.031	-2610.94	2681.25	-1990.88	117.25	0	525.875	5633.31	2844.5	5014.53	-556.625	3825.06	4579.5
9.88479	2721.5	766.594	2369.06	9607.88	213.188	-1674.81	2529.88	-1565.12	-527.125	0	751.781	6425.69	2851	4977.59	-532.875	4467.69	3930
9.88459	2754.31	842.047	1727.5	9781.75	94.5938	353.688	2397.44	-1599.44	-835.625	1052.81	981.062	6239.19	2947.69	5011.09	-212.5	4156.19	3357.69
9.88439	3111.94	858.656	1397	9675.19	17.0625	2437.69	1862.5	-1952.69	-619.5	2115.94	1236.66	4876.06	3290.88	5273.88	619	3853	2991.78
9.8842	2710.19	752.672	974.812	9495.75	327.781	3389.38	1260.25	-2108.06	110.375	2275.88	1728.81	3158	4205.75	5590.28	1565.12	4312.75	2715.53
9.884	1653.31	623.406	304.062	9639.38	979.5	2861.38	1385	-1744.72	1218.88	1734.19	2476.25	2029.19	5214.56	5696.75	2149.38	4993.44	2561.16
9.8838	863.938	494.781	0	9775.94	1566.75	1494.5	2304.75	-1032.09	2432.62	1346.75	3214.47	1678.44	5486.94	5509.66	2084.75	4963.44	2797.78
9.8836	531.125	338.672	0	9262.44	1795.34	263.125	3091.69	-390.469	3288.38	1442.5	3698.34	1704.31	4976.38	5196	1432.88	4359.12	3499.78
9.8834	-45.625	241.078	0	8377.81	1650.53	-266.875	3003.19	-92.0938	3341	1497.19	3937.78	1840.06	4417.44	5013.53	921.375	4085.25	4246.12
9.8832	-1057.25	320.484	0	8121.94	1219.66	-104.188	2400.38	-117.5	2545.75	1073.81	4053.56	2095.69	4427.19	5050.59	1561	4387.25	4477.78
9.883	-1603	491.719	394	8623.81	662.156	508.812	2091.38	-306.562	1278.62	597.688	4030.66	2323.62	5092.69	5128.66	3360.75	4656.94	4076.06
9.88281	-895.812	510.578	1127.69	8812.38	312.781	1378.75	2246.75	-548.969	-18.5	825.188	3779.72	2196.44	6111.75	4992.25	4913.25	4524.75	3418.5
9.88261	648.375	293.062	1525.81	8060.69	485.812	2371.12	2499.69	-792.188	-986.5	1768.31	3408.25	1747.94	6843.75	4561.75	4982.62	4208.88	2936.31
9.88241	2049.19	25.625	1087.69	7089.44	1102.19	3380.81	2710.75	-928	-1284.5	2591	3234.72	1467.38	6554.44	3976.91	4094.38	3766.5	2779.91
9.88221	2990.94	-105.484	270.875	6656.88	1743.19	4305.19	2945.19	-819.062	-880	2618.06	3438.31	1618.19	5123.38	3472.81	3692.12	2925.88	2850.75
9.88201	3776.56	-149.609	0	6410.56	2142.62	4885.81	2945.56	-499.844	-369.875	2106.5	3810.56	1860.19	3280.06	3266.5	4021.62	1827.38	2958.94
9.88181	4348.19	-273.281	358.5	5886.38	2425.31	4700.88	2389.62	-231	-358.875	1823.81	3992.66	1834.31	1813.75	3445.53	3950	1101.31	2933.31
9.88161	4159.31	-528.812	940.188	5704.94	2804.97	3653.5	1621.38	-231.5	-429.875	2058.12	3903.66	1735.38	925.438	3836.66	2914.5	996.312	2722.75
9.88141	3152.5	-844.203	1419.31	6648.38	3271.69	2407.5	1388.19	-433.438	466.375	2295.31	3770.75	1919	651.938	4057.72	1878.88	1171.19	2429.28
9.88122	2215.06	-1142.03	2015.94	8144.44	3684.31	1874.69	1739.75	-626.156	2317.12	1859.19	3732.31	2260.94	1282.56	3843.19	1834.75	1472.88	2175.03
9.88102	2231.56	-1341.48	2893.5	8807.94	3961.62	2175.88	1809.5	-753.969	3632.62	714.562	3596.16	2377.44	2718.44	3313.81	2277	2050.62	1955.66
9.88082	2988	-1309.09	3920.88	8193.38	4025.28	2559.5	898.875	-907.906	3288.25	0	3100.47	2282.06	3935	2871.06	2003.12	2505.88	1691.19
9.88062	3431.25	-958.062	4989.12	7073.69	3723.16	2488.25	-675.688	-1100.19	1974.5	0	2289.69	2356.38	3921.75	2886.38	943.375	1956.38	1370.22
9.88042	2899.06	-402.234	5963.81	6270.56	3006.94	2277.25	-1946.94	-1258.81	1070	284.75	1468.75	2754.25	2954.38	3516.91	299.125	419.125	1054.22
9.88022	1760.25	97.1562	6315.69	6106.31	2089.91	2362.69	-2107.19	-1420.25	802.75	1547.69	834.094	3232.19	2211.56	4637.88	924.875	0	782.531
9.88002	888.062	369.031	5501.62	6747.88	1255.44	2485.56	-957.188	-1711.59	462.125	2157.31	321.25	3530.25	2249.25	5805.72	2279.12	0	558.5
9.87983	806.438	457.781	3936.69	8120.81	583.688	2110.44	903.812	-2125.88	-141	1932.62	-155.125	3642.12	2544.5	6458.97	3129.5	247.688	385.094
9.87963	1361.19	509.031	2933.69	9560.25	33.125	1260.69	2258.69	-2501.94	-539.25	1847.44	-461.938	3784.31	2511.75	6404.22	2826.5	1029.69	246.844
9.87943	1947.5	607.281	3234.31	10345.8	0	376.688	2233.38	-2732	-639.125	2924.81	-358.375	4254.56	2288.56	6040.66	1690.38	1510.94	124.312
9.87923	1984	759.344	4028.62	10500.3	0	-330	1276.88	-2798.59	-826.125	4806.5	204.312	5045.25	2357.06	5904.81	513.875	1957.44	85.5625
9.87903	1363.12	966.062	3917.56	10397.2	65.4062	-751.375	673.25	-2619.66	-1131.75	5838.44	977.594	5429.12	2884.25	6067.22	-43.625	2110.38	252.594
9.87883	500.688	1222.09	2594.19	9878.44	266.219	-416.938	952.75	-2106.09	-1223.12	4847.19	1603.47	4460.94	3626.94	6190.62	213.125	1740.06	598.125
9.87863	-170.75	1430.69	1066.5	8645.44	104.562	978.625	1418.12	-1409	-1140	2539.25	1864.25	2327.75	4172.69	6094.34	992.125	1555.88	918.969
9.87844	-662.25	1382.3	299.125	7302.06	0	2600.62	1450.88	-853.156	-1165	729.125	1768.22	604.5	4187.94	5972.12	1823.62	2398.62	1125.28
9.87824	-1150.12	895.438	150.312	6990.19	0	2937.81	1485.75	-553.625	-1054.25	310.562	1476.28	457.812	3712.25	6060.5	2485	3813.81	1379
9.87804	-1377.38	11.2656	0	7955.75	0	1576.69	2144.38	-341.25	-342	497.125	1202.94	1136.25	3265.19	6383.5	3053	4530.75	1773.69
9.87784	-790	-978.719	0	9342.94	198.875	-152.375	3030.38	-121.469	623.5	149.125	1154.41	1194.94	3365.81	6865.5	3536.5	4247.5	2069.97
9.87764	664.75	-1729.16	0	10393.5	588.312	-686.938	3140.56	17.3438	928.625	0	1447.97	768.688	3856.56	7407.88	3733.88	3882.5	2008.09
9.87744	2301.19	-2055.31	0	10970.1	1074.03	157	2166.38	181.75	420.875	0	1998.19	1314.88	3984.25	7758.56	3586.38	4028.81	1724.44
9.87724	3399.88	-1961.7	0	10952.9	1725.41	1459.62	729.062	781.438	-208.125	0	2509.97	3161	3358.56	7595.88	3355.62	4196.5	1535.44
9.87704	3775.44	-1541.28	0	10235.3	2471.31	2470.25	-494.125	1956.94	-726	920.938	2692.38	4725	2682.62	6944.47	3104.12	3822.38	1415.69
9.87685	3544.94	-921.297	0	9525.75	3185.44	2979.19	-1266	3165.53	-1604.25	1253	2519.81	4587.38	3234.12	6316.28	2269.5	3109.5	1077.78
9.87665	2858.56	-248.406	0	10029.1	3806.22	2846.62	-1510.88	3700.75	-2717.5	445	2223.69	3164.06	5466.88	6201.88	313.625	2458.56	544.531
9.87645	2115	383.297	0	11809	4297.38	1964.94	-1137.81	3470.38	-3045.38	0	2013.25	1762.94	8264.56	6490.44	-2271.25	1793.69	219.75
9.87625	1902.81	972.859	0	13354.1	4579.66	656.812	-252.688	2921.09	-2259.25	0	1899.62	1014.44	9893.62	6579.56	-4193.88	960.688	297.281
9.87605	2295.5	1487.66	0	13336	4605.12	-482.688	822.312	2328.28	-1485.25	0	1830	908.562	9748.12	6050.94	-4690	312.875	493.188
9.87585	2649.5	1754.69	0	12043.6	4448.78	-1199.12	1829.75	1574.97	-1655.5	84.75	1858.22	1433.19	8777.81	5118.34	-4033.62	394.188	545.375
9.87565	2557.12	1650.66	0	10491.8	4227.34	-1627	2681.44	611.5	-2015.88	1524	2052.75	2319.12	8057.75	4401.12	-2628.5	1253.31	633.562
9.87546	2528.88	1388.03	0	8887.38	3964.28	-1799.38	3332.38	-293.75	-1292.88	2135.12	2321.25	2849.94	7566	4335.91	-438.875	2384.25	1043.41
9.87526	3132.19	1370.16	0	6839.19	3651.75	-1620.69	3749.25	-891.188	297.5	1442.75	2484.28	2738.19	6904.75	4832.56	2192.25	3223.94	1671.09
9.87506	3896.5	1658.62	0	4617.56	3424.09	-1313.38	3906.69	-1228.5	1319	17.1875	2495.72	2589.31	6517.75	5457.44	4001	3577.44	2156.81
9.87486	3874.25	1799.48	0	3262.88	3494.75	-1292.69	3659.06	-1440.78	1088.88	0	2445.75	2771.69	7052.5	5876.31	4031.25	3705.94	2346.19
9.87466	3048.44	1359.77	0	3485.75	3847.25	-1461.88	2819.81	-1514	371	0	2354.75	2550.88	7801.44	6053	2977.12	4054.75	2338.38
9.87446	2325.81	476.469	6.5625	5056.69	4132.06	-1234.56	1582.5	-1427.78	169.25	679.438	2123.44	1297.44	7176.75	6053.59	2355.12	4760.94	2187.81
9.87426	2172.75	-342.766	1041.5	7201.25	4018.62	-530.938	601	-1317.19	677.125	1882.25	1722.97	-101.75	4995.25	5833.59	2585.5	5475.25	1852.22
9.87407	2080.06	-840.844	1986.06	9035.62	3573.81	-138.5	358.812	-1278.5	1489.75	2639.75	1296.12	-240	3025.25	5332.12	2845.38	5802.31	1419.72
9.87387	1492.56	-1170.36	2749.19	9708	3134.38	-591.125	703.375	-1162.47	2133.38	3140.44	1000.25	737.625	2741.56	4655	2623.88	5694.19	1139.66
9.87367	542.875	-1493.17	3141.56	8847.75	2858.44	-1213.5	1291.44	-789.562	2220.12	3425.5	841.562	1282.19	3660.56	4002.75	2298.5	5171.25	1161.28
9.87347	-323	-1722.38	2984.5	7187.69	2616.25	-1017.38	2128.56	-287.281	1631.62	3148.88	720.875	608.188	4528.75	3485.06	2131.38	4047.62	1378.25
9.87327	-828.438	-1714.73	2506.06	6287.94	2349.81	-268.875	3199.19	26.5938	778.875	2258.19	566.219	-396.875	4999.19	3149.91	1867.75	2462.62	1574.81
9.87307	-816.562	-1474.53	2179.88	7151.25	2287.66	-272.938	3903.75	85.0312	328.875	1380	376.375	-563.312	5240.5	3105.47	1598.88	1339.5	1635.47
9.87287	-330.25	-1071.86	2133.81	9167.19	2629.09	-1507.31	3542.38	167.156	528.25	1110	204	233.125	4988.88	3414.91	1884.62	1536.75	1583.69
9.87267	105.375	-555.297	2027.19	10736.3	3178.97	-2812	2275.94	483.375	1027.5	1278.5	127.969	1353.69	4208.56	3929.5	2566.75	2668.44	1482.06
9.87248	-76.4375	-35.7812	1535.69	10959.6	3529.75	-2859	1024.94	864.594	1350	1423.06	174.312	2151	3883.44	4424.91	2575.25	3587.38	1334.44
9.87228	-574.812	348.062	704.25	10419.6	3544.28	-1795.06	438.938	1017.22	1222.88	1709	261.406	2139.69	4806.94	4856.06	1540.38	3996.06	1086.47
9.87208	-437.5	674.031	0	10176.3	3429.59	-806.625	480.688	953.688	513	2660.06	333.469	1173.69	6103.44	5280.91	561	4607.75	725.781
9.87188	539.188	1242.89	0	10359.6	3354.34	-451.75	927.625	940.375	-692.125	3981.81	556.094	-139.938	6252.88	5622.53	595	5557.56	354.812
9.87168	1347.56	2151.19	0	10208.4	3272.44	-183.688	1645.44	1034.59	-1822.12	4455.06	1202.69	-763	5211.62	5792.44	1067	5770.06	109.625
9.87148	1119.38	3012.83	0	9322.75	3210.47	555.125	2355.06	932.219	-2086.62	3403.19	2246.22	-321.688	4236.38	5989.69	1020	4487.31	27.5
9.87128	278.688	3334.86	0	8212.44	3450.09	1512.94	2766.44	409.969	-1318.12	1709.62	3209.34	544.625	3916.75	6516.84	713.875	2542.5	62.8125
9.87109	-198.062	3078.08	79.5	7439.62	4177.66	2108.81	2991.12	-274.031	-332.25	819.625	3583	1166.19	3760.12	7258.69	909.75	1365.38	192.75
9.87089	-96.625	2617.3	1067.38	6852.88	5086.53	2165.81	3203.44	-656.344	-158.875	1080.69	3333.5	1668.44	3569.44	7698.38	1310.62	1369.75	401.875
9.87069	122.812	2220.58	2298	6090.25	5600.91	1828.69	2948.81	-656.438	-994.125	1687.5	2865.19	2475.19	3766.12	7552.16	1077.12	2056.06	614.938
9.87049	315	1847.88	3346.25	5295.69	5498.94	1182.5	1685.12	-616.938	-2108.38	2074.5	2547.62	3407.25	4235.5	7048.66	430.125	3060.69	793.5
9.87029	789.438	1469.42	3800.44	4743.31	5113.59	394.25	112.312	-745.875	-2711.5	2577.12	2440.06	3742.44	4240.69	6458.16	341.375	4172.31	1045.72
9.87009	1562.88	1271.67	3665.12	4150.75	4873.66	-28.375	-193.125	-805.344	-2670.62	3534.06	2449.56	3056.88	3768.88	5728.72	864.375	4791.62	1434
9.86989	2083.5	1400.72	3206.25	3084.88	4816.34	371.812	984.188	-481.562	-2363.12	4407.31	2550.84	1740.5	3689.25	4834.19	1146.5	4471.88	1718.5
9.8697	1831.62	1725.41	2554.38	1852.88	4639.53	1373.56	1752.31	170.344	-2094.38	4326.19	2745.31	681.5	4232.44	4133.44	1038.75	3808	1585.34
9.8695	935.875	2051.59	1774.88	1291.5	4117.59	2197.19	560.062	842.219	-1863.88	3237.19	2920.59	479.562	4569.56	4012.53	1290.25	3724.69	1165.19
9.8693	128.062	2418.44	1211.12	1733.44	3349.75	2293.5	-1498.62	1349.78	-1581.5	2027.25	2902.81	927.625	4327.06	4339.78	1966.12	3916.94	993.625
9.8691	99.375	2943.28	1343.06	2774.19	2626.66	1777.38	-2087.62	1657.47	-1229.12	1536.31	2673.72	1382.81	4191.12	4596.12	1995.75	3139.19	1319.97
9.8689	766.625	3439.8	2238.38	3967.62	2128.94	1123.94	-735.188	1653.94	-763.5	1789.88	2461.81	1703.12	4375.56	4466.97	740.75	1264.5	1764.69
9.8687	1286.5	3456.03	3427.81	5091.44	1789.62	724.375	936.438	1203.5	-87	2247.06	2546.84	2450.81	3871.88	4090.5	-1051.38	0	1857.69
9.8685	1156.12	2768.66	4367.31	5790.5	1474.94	729.188	1822.38	426.062	767.25	2520.25	2950.66	3872.44	2254.31	3841.78	-2318.25	257.812	1618.97
9.8683	1115.25	1674.03	4763.5	5719.56	1291.09	997.875	2457.75	-320.125	1608.25	2720.56	3353.81	5170.62	1063.5	4061.53	-2817.12	1566.62	1340.06
9.86811	2229.94	691.438	4468.44	5149.94	1585.41	1127	3236.25	-800.281	2366.5	3236.5	3368.88	5420.31	1989.31	4827.25	-2818.25	2174.88	1079.72
9.86791	4096.12	85.3125	3453.56	4778.69	2500.88	801.125	3216.25	-1070.19	3165.5	4276.25	2907.06	4845.69	4362	5742.12	-2522.62	1868.25	763.031
9.86771	4976.25	-222.969	2046.56	4806.12	3586.75	192.938	1678.25	-1238.78	3924.62	5556.19	2250.78	4346.81	5901.12	6099.47	-2184.62	1808.38	616.125
9.86751	4103.75	-382.75	887	4835.25	4064.91	-248.5	-371	-1256.5	4182.5	6428.69	1768.28	3984.88	5680.56	5535.38	-2027.12	2573.12	1054.34
9.86731	2783.94	-432.531	420.438	4772.88	3563	-433.312	-1477.62	-1050.66	3697.5	6452.94	1598.78	2977.94	4966	4430.78	-1710.75	3446.38	2105.56
9.86711	2470.62	-399.078	577.125	5081.12	2467.69	-675.375	-1699.31	-722.469	3023.5	5878.06	1609.06	1246.94	5042	3452	-692.625	3779.5	3260
9.86691	2722.88	-422.609	1021.5	5888.25	1504.75	-1000.56	-2021.38	-451.781	2955.12	5401.25	1586.94	-140.75	5521.38	2840.72	647.75	3960	3971.09
9.86672	2147.44	-672.219	1475.38	6580.94	1096.69	-932.375	-2443.12	-259.469	3393.25	5356.69	1441.47	-414.188	5347.38	2417.28	1237.38	4499.56	4120.84
9.86652	642.062	-1163.55	1706.12	6655.38	1168.38	-335.688	-2123.31	7.125	3306.5	5319.25	1246.78	11.625	4528.38	2091.84	1020.25	4981.94	3985.94
9.86632	-580.062	-1725.92	1526.19	6379.5	1389.78	10.6875	-1179	450.562	2045.88	4674.38	1110.81	553.188	4031.81	1960.91	1290.38	4703.75	3928.22
9.86612	-803.5	-2149.17	1046.81	6226.38	1460.78	-638.25	-770.875	968.375	286.375	3428.5	987.594	1370	4327.19	1958.81	2673.62	3912.5	4105.84
9.86592	-359.812	-2325.97	683.25	6184.25	1285.72	-1692.75	-1201	1347.38	-685.125	2190.69	663.25	2547.88	4827.56	1834.09	3897	3574.5	4319.31
9.86572	416.375	-2264	635.625	5997.06	1034.56	-1713.81	-1371.12	1474.53	-406.75	1433.88	11.75	3262.56	4867.38	1542.44	3523	4041.81	4177.16
9.86552	1461.5	-2025.53	568.938	5596.5	971.906	-374.625	-628.438	1424.09	354.125	1118.06	-762.094	2761.81	4664.5	1334.62	2034.62	4698.31	3570.84
9.86533	2215.06	-1698.11	124.25	4966.69	1117.28	867.312	185.312	1343.34	569.75	1095.38	-1271.91	1654.88	4868.44	1373.62	1097.25	4984.25	2890
9.86513	1928.25	-1395.3	0	4102.88	1176.12	627.375	302.562	1296.31	77.875	1479.44	-1378.25	1219.5	5351.25	1551	1343.12	5076.44	2549.72
9.86493	999.812	-1216.08	0	3431.06	935.781	-431.875	431.5	1258.25	-338.375	2291.25	-1334.44	1702.5	5085.81	1769.69	1968.12	5306.88	2416.59
9.86473	754.625	-1163.84	289.5	3676.94	597.5	-355.688	1474.62	1216.5	69.375	2973.81	-1418.56	2213.25	3570.94	2127.22	2140.88	5496.12	2006
9.86453	1459.12	-1122.12	1116.56	4891.31	520.812	1472.44	2771.69	1170.16	1068.12	2704.06	-1534.28	2141.62	1941.81	2702.09	1820.62	5275.81	1194.16
9.86433	1742.94	-954.734	1410.44	6166.5	745.312	3370	2998.31	1032.97	1630.75	1273.38	-1324.62	1780.19	1979.75	3393.41	1393.88	4694.06	384.594
9.86413	626.562	-650.641	1105.81	6784.19	1009.34	3396.94	2278.06	691.219	1100	0	-653.25	1523.38	4034.94	4082.53	1323.38	4070.94	-58.9688
9.86393	-958.438	-357.641	571.375	7074.75	1171.69	1660.31	1924.94	233.406	-99.375	0	154.281	1275.31	6536.56	4729.75	1941.5	3495.12	-197.844
9.86374	-1507.5	-255.797	165.438	7639	1319.5	-86	2240.06	-27.7188	-1092.75	0	590.531	883.125	7693	5208.16	2880.75	2864.44	-245.531
9.86354	-894	-392.766	146.375	8340.56	1463.12	-712.188	2047.5	89.0938	-1558	485.688	443.812	565.312	7104.19	5294.22	3024.62	2258.12	-238.688
9.86334	-3.875	-629.062	708.062	8723.5	1464.12	-676.312	659.188	354.281	-1683.38	3194	-24.8125	653.25	5518.94	4988.94	1779.25	1879.88	-134.312
9.86314	865.312	-718.656	1697.56	8844	1388.62	-764.75	-1022.75	361	-1419.12	5714.31	-374.688	1249	3725.19	4640.19	91.125	1695.94	50.9688
9.86294	2074.19	-457.312	2410.81	8896.06	1631.41	-877.875	-1876.5	-26.6875	-474.25	7004.5	-439.156	2227.31	2223.94	4555.31	-613	1440.12	396
9.86274	3468.62	169.125	2119.06	8512.06	2453.12	-549.938	-1924.94	-611.75	912.625	6711.88	-442.562	3236.62	1459.88	4649.88	-213.375	955.875	1120.88
9.86254	4295.06	923.891	952.688	7378.06	3554.44	83.125	-1702.62	-1160.34	1879.12	5380.06	-637.688	3692.06	1577	4660.72	228.875	359.75	2220.59
9.86235	4290.81	1459.33	0	6205.56	4316.69	603.062	-1284.38	-1558.09	1873.62	3875.75	-920.969	3165.94	2030.75	4557.5	119.125	0	3208.91
9.86215	3935	1619.58	223.25	6056.31	4373.59	1141.94	-799.188	-1729.31	1182.62	2717.25	-941.406	1859.56	2025.5	4530.09	-147.125	259	3501.75
9.86195	3514.88	1602.91	1681.5	6819.38	3807.19	2010.12	-1047.19	-1654.78	293.875	2053.25	-547.875	408.312	1377.19	4667.19	-234.875	1338.31	3025.34
9.86175	2775.62	1727.73	3488.19	7406.06	2924.75	2696.12	-2452.81	-1488.62	-703.875	1983	55.9688	-751.688	578.438	4874.94	-415	2568.56	2259.94
9.86155	1731.06	2030.88	4664.25	7517.81	2046.66	2219.44	-3871.5	-1434.53	-1705.25	2455.19	630.031	-1527.31	99.5625	5088.16	-842.375	2832.44	1695.47
9.86135	1087.88	2225.12	4538.44	8145.12	1427.06	623.562	-3642.5	-1474	-2113.5	2932.81	1181.94	-1835.06	53.0625	5362.81	-1070.5	1922.62	1390.44
9.86115	1442.44	2113.19	2807.19	9921.94	1158.97	-770.125	-1757.38	-1432.12	-1422.12	2692.81	1841.06	-1590.69	462.125	5724.88	-612.375	1151.44	1080.78
9.86096	2504.62	1892.91	0	11898.7	1138.66	-943.812	87.125	-1335.56	-51.125	1694	2584.16	-1008.94	1273.69	6066.78	455.5	1824.5	614.25
9.86076	3477.12	1890.61	0	12598.1	1225.44	-267.25	735.188	-1424.66	968.125	807.25	3185.62	-469.938	1962.75	6257.84	1540.25	3404.62	206.906
9.86056	3863.88	2072.41	0	11734.1	1378.66	410.625	871.812	-1710.81	1139.88	866.875	3352.53	-76.6875	1692.94	6283.59	1837	4193.5	246.75
9.86036	3613.75	2043.22	0	10251.2	1541.53	988	1659.62	-1804.94	939.5	1678.19	2881.03	286.625	293.938	6219	780.375	3756.62	837.812
9.86016	2842.81	1575.94	0	9007.88	1530.22	1809.62	2905.94	-1384.25	1085.38	2276.5	1833.66	559.75	-1234.56	6092.81	-1278.75	3428.88	1606.12
9.85996	1864.75	967.219	0	8082.31	1247.56	2802.62	3338.31	-631.312	1685.25	2062	626.094	658.062	-1693.31	5830.59	-3057.12	4059.88	2047.34
9.85976	1306.62	751.781	45.5625	7303.5	915.438	3695.62	2333.44	-16.6875	2187.75	1357.5	-240.188	905.562	-1067.75	5368.22	-3599.62	4572.38	2020.47
9.85956	1698.75	1149.03	391.125	6858.44	840.531	4587.38	632.812	181.344	2034.75	883.875	-632.094	1680.12	-462.312	4813.22	-3278.75	3702.81	1785.53
9.85937	2854.5	1880.75	1055.69	7088.31	972.156	5428.44	-667.312	-37.0625	1310.12	1016.25	-816.094	2635.19	-569.25	4418.62	-2874	2175.69	1626.31
9.85917	3916.25	2465.25	1506.56	7904.81	951.875	5387.94	-1293.94	-568.469	748.375	1606	-969.469	2982.38	-698.5	4336.75	-2132.62	1791.5	1633.25
9.85897	4105	2595.3	1557.5	8716.44	631.281	3840.19	-1765.94	-1186.97	1001	2208.75	-903.5	2619.44	311.75	4465.62	-335.375	2813.06	1830.03
9.85877	3314.5	2291.03	1800.44	9009.62	285.688	1784.75	-2515.69	-1500.03	1911.25	2362.94	-423.906	2156.31	2543.5	4632.53	1985.25	3681.56	2239.59
9.85857	2044.94	1816.88	2630.06	8813.81	237	1053.38	-3345.44	-1255.75	2701	1950.31	288.875	1632.19	4865.31	4858	3270.62	3336.94	2718.66
9.85837	1027.69	1462.69	3580.81	8406.56	502.531	1957.31	-3674.38	-670.281	2827.88	1480.56	900.5	238.812	6234.69	5272.09	3000.75	2475.25	2932.78
9.85817	912.75	1309.89	4072.5	7754.19	935.156	2888.56	-3101.38	-195.438	2331.88	1727.5	1320.28	-2078.06	6597.88	5791.44	2228.5	2100.25	2659.78
9.85798	1909.94	1163.95	4216.75	6716.44	1484.69	2607.62	-1719.5	7.21875	1383.62	2797.12	1610.62	-3737.19	6484.38	6090.56	1763.62	2005.88	2037.03
9.85778	3437.06	754.797	4357.44	5820.62	2137.22	1748.31	-80.6875	114.062	67	3818.56	1695.12	-3302	6332.31	5969.84	1191.62	1474.25	1435.53
9.85758	4394.44	30.1094	4328.19	6149.56	2757.62	1397.62	1095.62	226.438	-1189.25	3948.69	1491.16	-1541.19	6454.31	5602.94	273.25	672.25	1170.62
9.85738	4223.75	-758.297	3824.12	7991.69	3194.34	1301.06	1415.44	249.844	-1592.38	3462.44	1205.22	-472.5	7071.06	5328.81	-68.125	409.75	1331.38
9.85718	3619.19	-1255.52	3162.81	10081.9	3453.34	552.438	1177.25	220.25	-868.375	3306.81	1132.09	-599.562	7908.81	5312.22	841.75	900.5	1725.81
9.85698	3729.69	-1279.66	2960.19	10818.2	3605.53	-678.188	1038.31	398.594	278.75	3684.25	1218.41	-434.875	8190.31	5477.44	2078.25	1603.75	1962.16
9.85678	4641.06	-934.484	3243.5	9976.88	3605.84	-1365	1081.5	879.469	1089.5	3816.62	1167.06	1059.75	7540.12	5643.72	2314	2107.06	1765.91
9.85659	5207.88	-499.781	3569.25	8627.81	3367.41	-1248.69	477	1369.31	1659	3332.38	940.031	2897.06	6576.75	5625.62	1609.5	2411.56	1264.53
9.85639	4618.19	-216.141	3873.81	7629.19	2948.81	-1028.44	-1489.75	1542.97	2285.12	3124.5	798.406	3602.62	6087.56	5313.03	862.375	2437.19	789.562
9.85619	3525.06	-148.234	4432	6965.88	2512.72	-982.688	-4187.5	1420.19	2391.25	4212	844.062	3311.88	5931.81	4774.59	135.875	2021.44	409.75
9.85599	3076.31	-232.25	5008.88	6448.19	2151.66	-571.375	-6004.94	1200.84	1121.62	6215.12	892.531	3318	5363.44	4228.03	-1109.25	1496.81	-67.7188
9.85579	3263.31	-407.672	4936.5	6160.62	1891.62	352.938	-6000.69	917.5	-1064.62	7735.75	861.125	4090.44	4190.56	3835.12	-2439.5	1558.19	-616.156
9.85559	3027.12	-634.828	4245.81	6053.62	1789	1031.69	-4659	495.969	-2486.88	8085.94	931.688	4834.31	2943.44	3598.47	-2555.12	2310.31	-888.562
9.85539	1894.12	-805.375	3843.5	5849.69	1848.62	1050.56	-2942.12	42.8125	-2280.62	7866.56	1231.41	4883.38	2050.94	3496.94	-1167.62	3026.5	-746.5
9.85519	658.062	-771.188	4092.88	5635.69	1913.5	1240.44	-1322.62	-183.812	-1487.88	7781.25	1669.5	4515.88	1534.5	3577.59	348.25	3112.69	-503.781
9.855	219	-534.719	3992.75	5919.94	1839.16	2524.94	-101.125	-62.4375	-1553.62	7648.5	2187.34	4167.88	1414.25	3810.75	572.5	2722.62	-384.25
9.8548	452.625	-298.141	2502.69	6838.81	1739.72	4363.5	106.25	318.781	-2393.75	6920.94	2838.81	3664	1699.62	3997.88	-461.875	2085.25	-108.031
9.8546	642.188	-209.266	202.312	7893	1831.72	5197.31	-983.5	836.062	-2710.12	5623.31	3497.31	2717.69	2025.19	3990.94	-1719.12	906.5	600.344
9.8544	488.125	-150.469	0	8695.88	2044.16	4320	-2523.75	1378.31	-1880	4337.94	3824.41	1705.38	2045.88	3912.56	-2433.62	0	1393.41
9.8542	171.938	68.125	0	9314.25	2047.59	2614.31	-3193.94	1739.53	-715.375	3623.06	3718.53	1378.31	2199.62	3974.81	-2541	0	1695.06
9.854	-199.188	374.969	734.5	9614.44	1737.81	1418.81	-2607.5	1691.72	-314.875	3809.5	3492.56	1944.88	3275.5	4127.56	-2342	0	1569.69
9.8538	-624.75	494.234	2209.06	9097.44	1433.53	1270.31	-1505.25	1254.47	-814.5	4981.06	3403.72	2801.25	5141.19	4082.75	-2151	0	1672.62
9.85361	-891.75	325.391	3080.75	7875.19	1459.91	1886.75	-671.125	763.094	-1513.88	6642.12	3299.44	3121.75	6745.25	3699.81	-2032.62	0	2321.03
9.85341	-801	60.9531	3363.44	6993.06	1748.28	2754.44	-284.375	588.969	-1817	7650.69	2967.47	2525.38	7562.06	3175.91	-1694.62	0	3082.53
9.85321	-672.312	-107.906	3194.06	7068.38	2019.06	3305.81	-278.5	856.062	-1696.5	7082.5	2556.66	1323.12	8132.19	2787.47	-901.5	234.75	3411.34
9.85301	-1108.19	-192.484	2810.31	7338.25	2180.41	2941.31	-583.875	1438.78	-1435.12	5194.25	2349.06	371.562	8841.88	2568.5	-17.625	1208.44	3311.47
9.85281	-2190.44	-237.984	2548.81	6965	2330.56	1527.5	-845.688	2121.94	-1256.88	3156.31	2318.44	557.688	9092.19	2326.75	297	1985.12	3180.5
9.85261	-3323.56	-180.391	2485.75	6606.81	2505.53	-143.125	-580	2707.34	-1221.62	1873.12	2213.72	2065.75	8251.12	1903.72	37.125	1802.44	3263.75
9.85241	-3948.69	-34.0781	2281.12	7460.81	2680.97	-926.75	47.5	3056.5	-1218.75	1428.5	1926.53	4055.31	6676.31	1330.94	-56.875	827.125	3454.69
9.85222	-4007.31	-47.5469	1633.12	9104.81	2965.38	-548.5	154.125	3115.06	-933.25	1552.75	1493.78	5226.69	5147.12	765.562	366.25	0	3471.19
9.85202	-3596.88	-455.125	736.688	9736.81	3518.22	150.812	-690.312	2898.53	1.375	2013.12	876.312	4818.38	3911.12	359.25	597.5	0	3101.84
9.85182	-2645.94	-1149.42	94.375	8683.69	4228.56	415.438	-1618.19	2468.75	1564.38	2389.56	47.4688	3116.75	2970.62	200.219	-167.625	0	2411.84
9.85162	-1238.81	-1772.25	0	7328.12	4684.84	557	-1340.69	1957.28	3065.88	2083.62	-749.656	1173.12	2736.19	311.438	-1568.62	360.688	1784.88
9.85142	103.312	-2068.52	273	7083.31	4564.44	1237.38	275.188	1547.22	3597.25	1016.81	-1092	102.375	3554.56	633.562	-2452.75	1826.12	1629.81
9.85122	886.562	-2008.97	647.125	7637.75	3948.34	2134.81	2013.06	1311.03	2962.12	20.5625	-729.281	353.625	4900.56	1014.94	-2383.12	2997.94	2001.25
9.85102	1199.5	-1675.53	980.75	7913.19	3196.81	2175.56	2718.69	1084.75	1995	55.5	261.594	1314.88	5810.31	1285.81	-2101.75	3135.38	2621.91
9.85082	1386.5	-1234.72	1461.06	7727.62	2621.38	1167.12	2468.56	641.844	1702.88	1136.38	1552.5	1744.12	5980.69	1386.31	-2337.12	2414.12	3234.41
9.85063	1303.38	-945.781	2312.12	7520.56	2323.78	333.438	2119.81	8.40625	2193.5	2402.81	2666.12	968.75	5807.75	1406.66	-2754.75	1450.62	3714.53
9.85043	460.812	-946.109	3263.88	7191.44	2236.62	743	2035.56	-526.406	2741.5	3186.81	3221.56	-347.5	5465.31	1498.62	-2529.12	368	3877.44
9.85023	-952.688	-1040.86	3508.12	6398.94	2220.91	1862.12	1736.31	-743.25	2808.75	3585.38	3326.66	-949.5	4622.5	1793.12	-1617	0	3513.47
9.85003	-1717.69	-926.375	2604.56	5641.94	2175.5	2381.56	845.938	-699.562	2493.38	3911.62	3551.03	-484.75	3190.88	2377.47	-875.375	0	2736.31
9.84983	-728.938	-597.797	1369.94	5868.12	2124.38	2034.62	-105.812	-577.188	1850.62	4030.44	4234.94	159.312	1869.12	3196.66	-907.125	0	2023.31
9.84963	1631.88	-277.641	1268.31	7051.75	2179.06	1700.25	-251.062	-494.469	409	3586.25	4983.12	84.25	1649.44	3910.47	-1288.88	508.812	1743.03
9.84943	3668.5	40.75	2668.62	8164.94	2393.62	1854.88	463.125	-542.312	-2044.5	2670.19	5154.16	-535.625	2816	4045.22	-1202.75	2249.31	1825.16
9.84924	3992.88	619.375	4222.25	8620.81	2695.47	1930.81	1220.94	-815.625	-4532	1838.81	4697.53	-883.688	4484.88	3501.84	-507.75	2904.38	1994.69
9.84904	2793.94	1428.59	4392.31	8783.88	2978.31	1472.69	1437.5	-1254.62	-5538.38	1447.69	4141.53	-612.312	5298.19	2802.56	198.75	2582.31	2086.28
9.84884	1470.94	1926.09	3218.69	8919.88	3213.62	1041.5	1343.94	-1596.19	-4711.25	1293.12	3867.88	-67.125	4836.25	2584.19	474.375	1832.94	1999.41
9.84864	1206.38	1643.28	2079	8673.81	3454.88	1364.38	1321.06	-1661.22	-3245.62	1048	3819.31	387.875	4212.06	2906.06	580.875	937.062	1636.34
9.84844	1990.06	773.062	2002.44	7975.69	3774.38	2167.56	1288.44	-1590.5	-2311.12	782.5	3873.16	756.312	4801.94	3319.06	1024.75	284.438	1128.19
9.84824	2908.12	-81.4219	2840.06	7484.62	4205.03	2594.38	1143.56	-1609.5	-1734.88	826.312	4038.06	1100	6470.56	3542.34	1836.12	554.312	890.406
9.84804	3230.19	-558.969	3949.25	7517.44	4692.81	2495.38	1222.56	-1643.75	-751.875	1294.5	4222.31	1283.5	7717.5	3679.94	2514.38	1775.19	1162.16
9.84785	3125.06	-665.156	4951.81	7369.81	5107.34	2538.25	1720.75	-1389.16	505.625	2012.06	4251.16	1214.81	7616	3735.06	2587.38	2763.69	1642.38
9.84765	3256.38	-421.766	5622.69	6492.31	5363.28	3050	2096.62	-741.469	1110.88	2785.31	4244.44	1095.5	6754.56	3393.06	2050.5	2302.94	1861.03
9.84745	3748.25	220.812	5633.5	5655.75	5522.84	3466.12	1750.62	58.75	734.25	3451.44	4571.53	1230.94	6011.31	2551.41	1318.62	654.438	1769.16
9.84725	3854.25	1128.97	4871.88	5993.19	5699.16	3171.38	981.375	728.531	40.375	3738.88	5249.56	1703.62	5363.06	1696.31	892.5	0	1644.41
9.84705	2876	1986.61	3822.75	7323.81	5867.59	2335.38	532.062	1199.62	-407.5	3454.31	5771.31	2347.62	4473.44	1394.31	1050.75	0	1526.94
9.84685	1187.19	2647.66	3305.25	8433.12	5885.91	1523.75	455.188	1532.59	-771.375	2825.12	5771.91	2947.12	3591.19	1648.62	1705.88	453.312	1155.41
9.84665	-74.125	3253.61	3792.69	8766.56	5710.94	875.25	276.688	1752.16	-1109.75	2276.75	5521.47	3351.56	3078.31	2100.44	2466.38	1965.81	501.219
9.84645	-295.438	3899.81	4990.5	8814.38	5457.94	165.688	81.0625	1848.03	-745.125	1783	5452.88	3493.62	2710.19	2626.53	2898.5	3121.12	-7.65625
9.84626	83.75	4376.67	5998.62	8888.12	5196.28	-523.625	382.625	1823.12	812.75	864.188	5497.66	3428.19	2239.62	3304.25	2820.62	3644	25.375
9.84606	444.938	4370.67	6000.62	8590.88	4831.44	-781.688	878.312	1690.88	2772.88	0	5265.06	3302.81	2067.81	3942.19	2396.5	3625.38	484.688
9.84586	879.875	3817.81	5045.62	7702.56	4279.62	-522.062	479.375	1526.44	3703.75	0	4688.16	3155.5	2528.75	4173.78	1944	3368.19	921.156
9.84566	1816.81	2986.16	4067.75	6650.75	3632.69	-119.938	-1031	1524.62	3163	0	4083.97	2773.19	3070.19	4041.72	1652.38	3119.06	1059.72
9.84546	3075.5	2291.38	3815.38	5749.81	3036.78	258.75	-2392.94	1855.06	2058	0	3643	1939.44	3062.25	4015.16	1490.75	2941.94	965.5
9.84526	3849.56	2040.09	3880.5	4758.06	2516.97	926.875	-2498.81	2428.78	1437.12	0	3240.34	876.5	2938.56	4294.94	1355.38	2908.75	807.688
9.84506	3662.5	2212.69	3290.5	3564.5	2049.56	1952	-1736.44	2969.09	1519.25	58.9375	2793.5	237.562	3550.19	4496.09	1216.88	3186.62	631.406
9.84487	2948.38	2445.8	2043.81	2606.12	1690.16	2702.69	-993.625	3345.06	1967.62	262.688	2497.91	455	4768.88	4215.28	1072.5	3734.62	371.438
9.84467	2510.25	2341.33	1351.88	2204.12	1460.91	2711.69	-176.25	3649.41	2499	529.938	2582.97	1199.38	5745.81	3598.66	890	4143.44	18.2188
9.84447	2622.12	1836.77	2053	2164	1208.19	2601.69	1243.31	3904.78	2918.12	968.75	3004.69	1750.19	6239.5	3119.22	746.25	4050.75	-259.688
9.84427	2879.12	1187.97	3395.31	2435	798.156	3310	2732.75	3946.28	2932.5	1516.75	3469.44	1894.19	6637.5	3034.53	934.625	3575.94	-201.906
9.84407	2856.06	624.844	3909.69	3408.62	413.25	4484.44	2983.81	3735.22	2329.5	1923.12	3660.5	2139.56	6915.69	3295.69	1694.12	3135.56	270.906
9.84387	2664.38	199.047	3086.06	4979.38	402.969	4616.12	1690.19	3553.94	1326.88	1775.06	3426.34	2917.38	6716.88	3803.38	2842.62	2992.12	918.406
9.84367	2705	-40.9062	1669.38	6036.44	805.781	3062.56	48.5	3671.59	611.75	938.438	2875.44	3882.56	6336.38	4490.5	3923.75	3130.56	1433.72
9.84348	2996.38	9.89062	648.938	5710.12	1264.12	1075.56	-757.312	3991.56	901.625	0	2326.25	4278.12	6460.75	5231.34	4706	3320.06	1798.44
9.84328	3062.44	283.219	539.875	4662.44	1515.91	234.25	-831.562	4268.91	2224.62	0	2065.69	3811.62	6904.06	5857.28	5237	3131.88	2205
9.84308	2595.31	466.656	1378.44	4319.25	1734.19	534	-983.812	4519.34	3555.5	0	2128.84	2903.81	6753.31	6227.5	5410.88	2253.5	2637.47
9.84288	1899.56	339.375	2716.62	5103.62	2187.84	810.875	-1423.5	4900.41	3574.25	745.688	2375.16	2218.44	5903.69	6201.81	4971.5	1047.06	2799.97
9.84268	1386	34.1406	3670.12	6159.06	2733.59	596.562	-1530.38	5260.06	2137.12	1662.56	2726.12	2200.62	5307.31	5672	4151.12	411.062	2587.12
9.84248	929.625	-207.703	3581.94	6579.06	2916.22	580.5	-751.25	5150.53	658.375	2358	3184.59	2886.75	5422.12	4753	3795.62	723.625	2370.12
9.84228	233.625	-412.797	2686.31	6169.62	2555.59	1308.19	612.062	4355.25	544.25	2399.31	3633.22	3805.44	5496.88	3833.75	4411.75	1276.69	2555.19
9.84208	-361.438	-795.781	1693.19	5177.19	2011.09	2337.94	1577.31	3152.41	1557	1646.38	3806.78	4199.44	4820.44	3293.91	5416.75	1179.69	3005.44
9.84189	-137.938	-1359.41	880.125	4037.06	1794.38	2958.62	1428.56	1985.69	2341.88	886.812	3553.66	3748.75	3741.19	3232.12	5804.75	498.938	3214.47
9.84169	867.375	-1783.62	175.938	3398.69	2053.56	3120.5	505.812	1102.12	2273.25	1260.06	3021.16	2996.69	2973	3548.16	5292.5	27.375	3015.41
9.84149	1709.56	-1752.91	0	3769.75	2510.78	3288.94	-62.625	593.5	1901.5	2821.06	2510.25	2666.44	2688.06	4153.97	4326.75	221.25	2778.41
9.84129	1785.25	-1282.23	620.312	5031.94	2811.31	3728.88	458.625	534.375	1659.25	4363.88	2227	2702.56	2732.44	4969.88	3239.5	878	2808.72
9.84109	1571.75	-690.312	1855.69	6635.94	2846.69	4229.19	1636.81	869.719	1176.62	4950	2216.06	2529.31	2987.69	5838.66	2046.62	1610.88	2857.38
9.84089	1717.56	-303.516	2388.31	8080.44	2771.34	4360.38	2449.69	1291.03	200.375	4920	2409.56	2136.12	3108.06	6611.69	961.25	2102.81	2474.03
9.84069	2040.44	-188.812	1744.12	8848.75	2781.09	3856.81	2465.88	1423.47	-725.625	5016.19	2628.75	2126.69	2656.06	7250.97	422	2121.06	1677.16
9.8405	2033.75	-154.234	863.125	8361.88	2892.38	2868.31	2159.56	1129	-1067	5232.56	2628.09	2549	1938.81	7734.66	545	1822.69	984.312
9.8403	1875.81	-23.8594	692.812	6720.31	2933.16	1858.88	2160.88	555.031	-1130.75	5122.38	2296.81	2524.81	1958.88	7991.78	1087.62	1786.69	798.938
9.8401	2189.19	136.391	940.938	5110.81	2745.5	1145	2553.06	-44.7812	-1481.75	4672.19	1818.66	1517.38	3038.19	8080.59	1975.12	2172.25	1006.84
9.8399	3023.19	180.828	906.188	4601.19	2365.12	642.25	2940.5	-453.594	-1994.38	4190.94	1519.25	307.812	4205.25	8273.66	3275.38	2219.38	1234.16
9.8397	3714.81	223.156	814.188	4782.75	1962.56	215	2917.81	-543.688	-2086.88	3747.69	1528.75	76.3125	4501.12	8721.88	4619.25	1375.19	1308.62
9.8395	3666.38	565.047	1404.44	4576.81	1652.38	12.9375	2374.44	-326.688	-1589.5	3339.25	1683.47	944.125	4222.25	9121.47	5330.75	547.562	1357.59
9.8393	2824.19	1196.2	2658.88	4155.69	1452.59	143.938	1532.38	37.7812	-891.875	3198.88	1785.19	2042	4243.81	8979.62	5334.62	1101.75	1590.75
9.83911	1607.06	1625.16	3907.81	4834.44	1414.28	303.062	775.25	345.469	-471.25	3260.19	1857.19	2709.12	4699.75	8192.41	5320.38	2674.44	2128.38
9.83891	805.625	1426.5	4931.25	6962.19	1631.22	186.188	315.5	466.312	-661.25	2749.38	2064.84	3008.19	5046.69	7121.12	5736.62	3295.19	2957.81
9.83871	1207.88	785.125	5988.25	9173.31	2033.44	1.6875	1.3125	366.312	-1569	1188.44	2445.16	3258.19	5026.25	6112.28	6187.62	2045.69	3901.16
9.83851	2719.25	258.047	6880.56	10136.6	2306.78	6.1875	-426.812	86.9375	-2797.25	0	2819.69	3626.94	4878.75	5221.47	6077.75	361.25	4638.19
9.83831	4125.62	128.703	6976.81	9953.62	2199.75	-169.5	-891.312	-254.469	-3509.88	0	2974.12	4070.31	4823.94	4452.31	5240.62	0	4899.84
9.83811	4368.38	258.125	6238	9297.38	1878.94	-925.75	-952.25	-510.438	-3207.88	1266.56	2843.12	4233.38	4851.31	3942.66	3628.75	688.188	4685.75
9.83791	3791.12	460.516	5336.75	8203.25	1796.31	-1583.62	-303.375	-618.875	-2269.5	3328.62	2506.56	3602.69	4873.5	3728.78	1140.62	1053.25	4236.66
9.83771	3437.56	696.328	4641.31	6486.56	2165.41	-881.625	792.875	-645.812	-1441.62	4174.88	2085.16	2209.31	4751.12	3561.03	-1639	679.188	3797.69
9.83752	3431.56	910.703	3935.56	4602.31	2720.19	1228.62	1642	-680.094	-1047.88	3776.12	1698	927.875	4368.19	3204.53	-3203	359.812	3467.91
9.83732	2967.75	1004.56	3279.38	3290	3051.12	3205.31	1689.56	-735.969	-937.375	3126.06	1486.59	549.812	3885.12	2792.34	-2556.25	431.812	3242.47
9.83712	1757.44	1031.14	3176.19	2828.88	3014.84	3710.31	966.562	-796.906	-831.25	3014.75	1607.97	792.625	3617.69	2626.38	-640.875	294.062	3072.66
9.83692	484.875	1161.97	3563.56	3166.81	2711.25	3006.94	-8.3125	-894.531	-386.125	3586.31	2158.5	804.938	3549.75	2690.78	543.25	0	2870.56
9.83672	-227.625	1386.86	3610.5	4198.12	2242.66	2170.12	-705.688	-1083.16	690.75	4583.44	3062.22	408.688	3398.75	2650.41	219.75	0	2589.84
9.83652	-362.688	1491.59	3032.25	5363.69	1709.38	1686.06	-872.188	-1366.06	2186.5	5657.25	4011	164.812	3210.06	2395.69	-527.875	0	2358.59
9.83632	79.3125	1405.59	2688.25	5647.81	1320.28	1389.81	-406.312	-1685.38	3377.75	6648.06	4573.41	390.938	3237.81	2337.88	-490.375	0	2412.06
9.83613	1187.75	1307.97	3185.38	4703.75	1220.62	1128.69	684.438	-1954.47	3806.12	7596.94	4480.53	878.312	3130.44	2961.19	117.875	0	2808.28
9.83593	2392.12	1268.47	3738.25	3504.25	1222.19	820.062	1918.5	-2085.41	3667.38	8201	3844.28	1492.19	2144.12	4174.88	304.125	0	3312.12
9.83573	2636.19	1046.7	3324.31	3213.44	995.188	281	2287.81	-2047.69	3185.88	7562.12	3042	2260.19	541.25	5323.12	-119.75	683.375	3655.44
9.83553	1775.31	449.609	2295.5	3865.25	602.219	-453.5	1226.5	-1934.59	2268.38	5245.31	2382.78	2890.25	-183.625	5866.69	-367.5	2882.81	3811
9.83533	901.625	-301.719	1779.44	4751.69	551.438	-1000.88	-383.812	-1906.5	1213.88	2471.75	1974.47	3033	853.875	5897.75	15.5	4254.88	3885.38
9.83513	734.25	-776.484	1938.19	5537.62	1151.5	-1184.62	-900.688	-2011.62	933.75	1187.25	1907.62	3041.06	2672	5889.22	431.5	4345.38	3843.5
9.83493	580.688	-782.359	1986.19	6213.56	2054.62	-1237.06	114.875	-2103.53	1647.62	1655.88	2366.66	3528.38	3765.44	6068.44	167.625	4185.12	3534.31
9.83474	-367.688	-433.75	1720.56	6431.88	2686.34	-1137.44	1265.06	-1973.12	2098.25	2040.06	3397.38	4062.38	3947.94	6231.34	-438.625	4688.31	2961.72
9.83454	-1495.75	95.75	1796	5808.94	2953.41	-458.75	1077.44	-1526.16	1172.12	957.188	4660.12	3398.19	3971.31	6160.47	-405.75	5307.69	2331
9.83434	-1482.69	677.219	2369.31	4668.38	3230.34	638.562	-200.75	-822.812	-239.25	0	5610.62	1417	4035.94	6012.19	446	4838.31	1794.75
9.83414	-109.812	1165.05	2613.81	3718.31	3735.84	1066.44	-1211.88	-29.2812	-325.625	0	5943.78	-289.062	3823.38	6150.22	1164.88	3145.69	1328.47
9.83394	1564.38	1440.8	1989.56	3179.44	4257.5	215.125	-1376.88	627.281	956.625	667.125	5760.34	-483	3537.31	6690.53	990.25	1414.12	912.594
9.83374	2600.06	1491.88	1105.75	2845	4519.34	-980.812	-1259.12	949.219	1761.12	1875.88	5334.41	44.4375	3670.31	7349.41	357.5	724.188	660.031
9.83354	2924.06	1303.27	808.062	2696.81	4519.31	-1223.19	-1249	904.438	1050.38	2066.31	4872.69	-147.062	3887.88	7713.25	157.125	922.812	661.281
9.83334	2782.12	751.422	1077.38	2779.44	4388.56	-478.938	-956.5	644.125	-42.25	2010.25	4505.91	-860.438	3306	7556.81	576.75	1036.19	850.562
9.83315	2238.12	-191.703	1351.62	2800.69	4154.56	471.562	-204	348.094	-72.375	2490.06	4320.12	-607.5	1945	6941.81	1298.12	417.062	1141.38
9.83295	1405.19	-1191.53	1408.75	2636.5	3802.28	1436.88	244.625	101.875	744.5	3054.81	4268.09	1074.25	918	6155.25	2301	0	1544.94
9.83275	702.312	-1721.95	1406.44	2931	3408.31	2580.44	-409.062	-68.2188	1244.12	2930.5	4136	2906.31	1001.94	5577.72	3583.88	0	1992.34
9.83255	645.25	-1561	1423	4341.69	3044.12	3295.19	-1799.12	-159.5	1072.25	2219.69	3739.06	3595	1825.75	5472.69	4444.38	0	2187.5
9.83235	1462.69	-967.469	1425.12	6371.31	2644.62	2745.81	-2742.19	-252.344	797	1462.31	3166.88	3278.06	2609.19	5789.38	4145.62	0	1898.75
9.83215	2839.75	-340.562	1430.94	7778.25	2123.09	1433.06	-2658.94	-471.062	830.25	676	2763.56	2925.12	2937.38	6197.5	3236.75	107.438	1359.53
9.83195	3978.88	133.047	1368.62	8024.62	1559.34	856.688	-2107.81	-763.562	1109.75	0	2802.12	3033.81	2656.31	6373.81	3054.12	88.9375	1104.72
9.83176	4221.62	461.484	1044.56	7571.31	1155.03	1450.19	-1841.44	-830.344	1537.62	0	3159.56	3366	1769.06	6261.56	3721	0	1343.03
9.83156	3797.88	680.922	526.562	6949.69	1039.69	2024.94	-1818.81	-436.5	2020.12	32.0625	3351.78	3538.56	718.25	6048.25	3786.88	0	1717.25
9.83136	3598.06	841.625	242.25	6372.25	1211.22	1530.88	-1510.56	254.438	2278.5	1910.75	2969.44	3469.06	176.312	5919.69	2280.75	779.875	1803.31
9.83116	3967.25	1035.12	428.062	6029.81	1613.47	321.438	-953.75	803.281	2199.25	3084.31	2107.56	3392.81	300.75	5860.38	19.5	2007.12	1643.72
9.83096	4188.19	1282.7	825.125	5827.56	2166.47	-638	-936.875	914	2176.5	2340.69	1296.41	3595.38	650.375	5694.22	-1732.62	2469.06	1599.09
9.83076	3558.69	1453.11	1171.56	5013.75	2738.53	-879.438	-1879.38	597.625	2587.88	593.125	976.625	3993.62	927.812	5316.81	-2875.38	2153.44	1802.38
9.83056	2516.19	1415.42	1560.75	3160.81	3174.06	-452.062	-2929.12	-12.5938	3123.75	0	1135.72	4022.75	1271.25	4866.19	-3889.12	1809	2004.06
9.83037	2086.5	1229.61	1984.25	1436.44	3363.66	280.875	-2765.38	-791.219	3149	606.625	1506.12	3237.56	1747.12	4622.47	-4545.62	2026.38	1948.38
9.83017	2493.31	1052	2035.88	1658.12	3284.25	605.562	-1291.25	-1541.69	2587.75	1614.94	1956.25	2000.25	2196.31	4748.06	-4270.62	2871.56	1696.12
9.82997	2955.56	871.391	1580.06	3893.12	3029.16	112.812	63.6875	-2005.28	1961.25	1499.25	2509.31	1183.56	2769.31	5201.31	-3230.25	4077.25	1501.72
9.82977	2786	502.781	1260.25	6172.88	2804.5	-374.688	-8.0625	-2082.59	1637.12	559.625	3083.47	1132.25	3972.81	5888.72	-2020	5098.5	1494.88
9.82957	2146.12	-92.5938	1668.06	6933.5	2772.69	473.875	-1212	-1949	1501.62	0	3464.75	1353.38	5836.12	6730.41	-651.625	5266.81	1572.34
9.82937	1680.75	-612.922	2312	6597.81	2834.69	2525.62	-2195.12	-1853.47	1323.75	0	3561.88	1406.81	7509.56	7480.25	1147	4503.12	1546.34
9.82917	1810.06	-674.953	2170.38	6251.19	2701.41	3992.75	-2174.62	-1866.28	1019.5	0	3498.59	1637.69	8080.19	7675.97	2892.12	3742.12	1342.38
9.82897	2435.38	-235.812	1157.75	5949.31	2310.03	3676.81	-1506.62	-1895.41	572.75	52.25	3404.22	2598.19	7530.88	7023.5	3609.62	4015.38	1084.38
9.82878	3081.25	346.156	261.812	5228	2054.19	2361.31	-865.625	-1887.41	97.125	525.625	3264.25	3988.81	6655.38	5794	3071.5	5118.25	1010.22
9.82858	3317.12	674.562	135.5	4440.12	2415	1405.12	-457.438	-1920.25	-14.625	1331.94	3015.69	4744.31	6232.31	4611.88	1936.25	5784.5	1249.38
9.82838	3185.69	667.984	285.438	4502	3401.09	1048.94	-83.75	-2104.59	576.5	1728.88	2645.16	4297.31	6414.19	3836.69	716.375	5238.5	1645.44
9.82818	3115	563.656	0	5597.88	4519.78	915.75	416.125	-2434.56	1562.5	1573.25	2154	3348.44	6738.94	3350.41	-571.375	3954.69	1846.94
9.82798	3326.06	659.016	0	6898.25	5274.03	1149.81	873.75	-2745.78	2074.12	1733.81	1585.84	3030.88	6683.81	2937.78	-1724.38	2712	1628.34
9.82778	3590.75	1060.31	0	7478.75	5506.19	1944.88	775.562	-2846.09	1581.62	2730.19	1143.47	3501.12	6306.81	2588.03	-2122.88	1560.12	1108
9.82758	3706	1598.94	1275.88	7117.31	5272.56	2641.19	-292.812	-2729.62	524.375	3755.5	1110.44	3837.38	6161.94	2320.97	-1393.25	151.875	634.219
9.82739	3818.88	1977.5	3346.31	6352.81	4648.41	2443.62	-1935.81	-2625.69	-144.5	3711.69	1558.09	3421.56	6396.06	2005.75	184	0	506.5
9.82719	4032.44	2084.61	4682.12	6005.44	3795.94	1667.62	-2985.75	-2751.56	31.75	2614.31	2244.81	2894.69	6372.44	1577.56	1975.62	0	840.219
9.82699	4100.44	2172.03	4721.5	6407.38	3043.38	1325.88	-2737.25	-3042.38	589	1335.62	2874.06	3302.69	5698.44	1257.12	3294.25	0	1606
9.82679	3863.44	2593.67	4171.06	7020.62	2680.97	1778.06	-1916.88	-3229.41	689.125	522.812	3328.59	4631.12	5148.06	1314.81	3566.75	0	2645
9.82659	3600.81	3336.16	4128.25	7157.94	2711.34	2597.12	-1810.44	-3156.31	6.375	446.125	3607.22	5802.94	5696.81	1718.03	2759.5	0	3626.28
9.82639	3551.75	3972.08	4686.25	7023.56	2931.03	3416.56	-2531.06	-2853.75	-964.125	1319.75	3716.16	6009.56	6915.44	2221.75	1570.38	0	4152.16
9.82619	3466.81	4158.92	4787.62	7388.94	3214.72	4072.5	-2858.19	-2300.09	-1446.5	2919.31	3736.91	5361.88	7402.81	2715.47	734.875	556	4063.56
9.826	3070	4000.34	3639.62	8207.38	3571.53	4225.19	-1886.69	-1352.31	-1147	4329.12	3824.91	4225.38	6804.75	3249.91	347.5	2374.19	3620.12
9.8258	2580.69	3774.78	1808.38	8395.69	3927.84	3698.31	-162.312	-61	-421.75	4970.75	3968.12	2752.62	6229.5	3789.34	314.125	3497.56	3250.88
9.8256	2276.12	3518.97	502.812	7294.19	4033.31	2982	1071.88	1130.12	193.375	5488.94	3868.12	1366.31	6377.12	4205.28	973.375	3742.88	3098.75
9.8254	1909.06	3135.39	204.812	5572.94	3693.41	2653.31	1198.62	1733.09	383.5	6642.81	3253.28	849.312	6424.62	4529.81	2410.88	3538.62	2915.59
9.8252	1137.44	2755.34	583.688	4311.75	3030.88	2575.5	497.438	1697.34	-7.25	7719.19	2260.62	1336.19	5383.25	4961.34	3537.12	3107.94	2450.5
9.825	213.062	2646.59	1357.31	3891.88	2417.84	2409.44	-407.188	1348.72	-1064.38	7310.94	1357.41	1862.88	3624.94	5542.16	3056.88	2210.69	1816.88
9.8248	-375.562	2799.89	2392.31	4170.75	2148.38	2518.19	-977.312	907.156	-2524.88	5544.5	915.844	1639.88	2307.56	6026.03	1390.12	1017.62	1358.38
9.8246	-667.062	2950.61	3152.62	4992.38	2215.12	3406.94	-974.75	325.5	-3589	4139.75	976.656	1234.5	1967.31	6163.94	468.875	573.438	1246.41
9.82441	-973.562	3028.44	3041.19	6044.25	2375.59	4552	-618.25	-352.156	-3448.75	4017.75	1374.62	1641.5	2337.38	5969.31	1306.5	1561.62	1386.06
9.82421	-1095.38	3223.14	2407.19	6874.94	2369.16	4862.56	-376.938	-754.875	-2160.25	4183.25	1958.53	2628.88	2911.5	5607.38	2796.12	2997.56	1687.34
9.82401	-504	3515.41	2307.38	7482.69	2075.06	4226	-444.812	-534.375	-731	3488.44	2687.56	3057	3044.25	5177.53	3409	3271.12	2202.22
9.82381	785.188	3531.41	3016.38	8215.12	1549.03	3543.56	-646	146.594	-113.25	2273.69	3575.78	2657.81	2211.19	4736.12	3150.25	2427.19	2909.31
9.82361	2159.56	3079.5	3640.62	8800.69	971.5	3214.69	-912.938	690.375	-248.5	1478.19	4513.09	2365.06	948.438	4413.47	3121	2099.19	3551.44
9.82341	3152.81	2510.67	3556	8430.38	535.281	2691.31	-1449.12	657.25	-379.25	1168.19	5143.09	2766.38	831.062	4326.25	3815.25	2900.31	3850.31
9.82321	3683.62	2256.61	3302.56	7259	325.5	1783.12	-2260.81	159.094	-206	931.125	5096.75	3301.25	2555.88	4392.97	4696.12	3383.06	3789.94
9.82302	3717.31	2241.16	3472.25	6715.75	283.5	1366.88	-2967.81	-373.75	-275.875	929.312	4472.84	3370.62	4634.62	4371.38	5143.25	2381.56	3544.75
9.82282	3333.44	2052.8	3586.94	7552.06	283.688	2280.62	-3312.81	-697.781	-1024.5	1465.31	3920.62	3311.94	5111.56	4124.97	5071.25	915.25	3208.94
9.82262	2982.25	1526.83	2960.06	8618.88	228.438	4209.5	-3418.06	-919.438	-1908.38	2036.25	4022	3695.75	4143.31	3800.94	4658.38	448.5	2762.56
9.82242	2973.06	842.047	2026.94	8534.06	85.125	6117.12	-3280.19	-1193.59	-2046.12	1959.81	4660.16	4354.25	3570	3702.25	4025	500.312	2255.62
9.82222	2826.75	172.828	1755.56	7585	0	7240.81	-2552.69	-1401.03	-1507	1638.12	5202.06	4753.94	4103.38	3973.59	3333.5	0	1832.59
9.82202	1902.69	-411.672	2044.62	6852.62	0	7323.12	-1273.88	-1228.53	-1238.88	2053.62	5245.19	4865.44	4422.19	4412.5	2906	0	1553.84
9.82182	598.75	-754.5	1794.94	6369.88	36.0625	6414.25	-296.562	-557.188	-1634.38	3068.06	4949.06	5064.62	3404.88	4633.94	3029.38	0	1349.75
9.82163	62.1875	-655.328	596.312	5561.19	615.906	4902.5	-339.062	316.656	-1931.38	3354.75	4644.88	5497.31	1946	4461.88	3604.88	24.0625	1191.28
9.82143	640.062	-153.625	0	4850.56	1442.81	3461.06	-910.875	905.25	-1427.5	2275.69	4396.06	6046.81	1751.56	4123.84	4051.38	719.062	1168.78
9.82123	1485.06	461.781	0	5236.25	2338.5	2683.88	-883.438	959.719	-610.875	876.812	4056.84	6634.06	3135	3997.28	3738	239.5	1335.47
9.82103	1885.12	949.891	0	6498.12	3220.16	2856.12	11.3125	650.406	-435	539.688	3575	7062.81	4864.06	4215.25	2644.88	143.688	1580.91
9.82083	2109.94	1244.47	875.562	7250.56	4040.34	3879.5	956.375	343.812	-941.125	1340.12	3076.53	6843.69	5785.69	4612.41	1472	1448.38	1735.44
9.82063	2596.44	1337.67	1559.31	6791.38	4638.38	5002.56	1319.06	255.031	-1383	2305.81	2719.78	5704.94	5858.62	4988.5	968.5	2947.56	1741.78
9.82043	3103.81	1279.86	2202.38	5756.62	4819.62	4955.62	1417.25	330.969	-1454.12	2812.44	2558.47	4115.81	5710.25	5253.31	1352.75	3177.94	1691.06
9.82023	3184.06	1269.83	3015	5010.06	4601.75	3213.5	1777.06	412.844	-1538.5	3036.88	2510.66	2837.19	5739.62	5340	2450.88	2500.44	1751.44
9.82004	2878.69	1473.78	3948.44	4947.19	4229.75	1061.44	2218.38	424.875	-1793.12	3209.12	2418.53	2078.56	5761.06	5208.19	3922.62	2077.31	2065.09
9.81984	2452.5	1738.81	4878.06	5731.81	3886.03	430.5	2128.56	364.344	-1827.12	3134.44	2187.25	1536.06	5321.81	5011.44	5030.12	2016.75	2613.59
9.81964	1951.69	1759.03	5748.06	7043.5	3523.31	1516.62	1380.62	168.219	-1473	2723.81	1890.56	1119.12	4341.88	5052.47	4775.25	1720.5	3161
9.81944	1514.19	1568.31	6459.12	7680.44	3070.06	2544.12	611.062	-284.812	-1156.12	2540.56	1693.91	1116.94	3405.75	5429.16	2974.38	1136	3441.97
9.81924	1641.31	1577.08	6755.31	6656.69	2665.69	2165.06	654.375	-979.312	-1223.12	3233.25	1677.91	1636.25	3206.06	5864.34	862.25	589.625	3448.41
9.81904	2593	2006.95	6387.94	4750.44	2537.09	978.188	1825.62	-1658.38	-1491.62	4387.12	1802.66	2330.69	3701.75	6025.69	-85.25	138.375	3430.91
9.81884	3804.44	2538.89	5484.44	3798.12	2691.5	133.688	3587.5	-2040.47	-1767.75	4547.06	2025.12	2795.19	4188.75	5888.62	296.625	0	3581
9.81865	4411.06	2668.39	4616.5	4375.69	2859.38	-381.875	4821.81	-2115.75	-2252.62	2920.38	2335.72	2905.38	4295.19	5648.47	1134.62	412.625	3826.97
9.81845	4172.31	2218	4193.5	5342.31	2743.22	-1068.25	4716.56	-2084.66	-3066.62	750.75	2650.56	2709.44	4471.19	5427.47	1915.5	1288.38	3979.69
9.81825	3507.62	1377.06	3799.69	5743.44	2271.25	-1454.69	3629.44	-1991.69	-3836.12	153.938	2771.97	2315.31	5227.06	5271.56	2657.5	1474.69	3929.62
9.81805	2840.81	434.859	2640	5860.5	1656.25	-677.938	2829.44	-1610.12	-4155.75	1463.69	2523.44	1989.94	6278.12	5306.78	2979.75	750.812	3621.72
9.81785	2317.75	-370.547	886.625	6102.5	1262.06	862.625	3044	-806.156	-4074.62	2647.31	1898.41	2055.88	6879.69	5622.62	2247.25	411.375	3001.88
9.81765	2010.56	-905.531	0	6197.69	1332.03	1731.38	3464.75	140.594	-3750.62	1920.94	1081.62	2498.31	6820.94	6021.19	780.5	1200.56	2147.31
9.81745	1968.62	-1212.22	1014.31	6042.69	1748.5	1366.94	2717.06	776.219	-3019.25	153.438	381.719	2861.62	6635.38	6150.91	-201.875	1899	1350.38
9.81726	2034.25	-1429.86	2966.94	6258.19	2121.28	715.875	813	958.531	-1788.25	0	105.125	2703.25	6807.06	5938.91	-167	1339.38	900.688
9.81706	1885.25	-1558.95	3680.31	7214.31	2209.94	775.312	-525.375	906.844	-557.375	1107.19	354.531	2021.44	7124.69	5673.62	157	544.938	799.781
9.81686	1363	-1463.86	2302	8296.19	2187.53	1409.75	82.625	803.875	16.75	2661.12	900.344	1105.75	7017.06	5585.81	101.5	1047.69	787.531
9.81666	712.062	-1201	184.562	8706.69	2361.12	1948.38	1773.62	585.5	-28.625	2678.06	1345.72	121.062	6399.69	5564.97	-30.75	2128	607.344
9.81646	483.25	-1123.05	0	8388	2696.09	2201.06	2310.62	172.344	-35.25	1754.75	1475.72	-918.75	5942.88	5426	203	1938.38	166.25
9.81626	1104.62	-1461.72	0	7802.69	2785.81	2364.12	770.75	-307.219	372.375	1673.75	1391.62	-1785.94	6324.81	5278.69	597.75	765.438	-479.844
9.81606	2360.38	-1976.22	148.5	7408.25	2295.56	2386.12	-1395.81	-648.406	902.125	2980.5	1299.19	-1938.5	7284.25	5424.28	903.25	707.625	-1162.91
9.81586	3330.88	-2244.08	791.312	7534	1312.84	1981.12	-2212.38	-784.438	1195.5	4466.25	1282.34	-1032.94	7766.44	5938.56	1375.62	2114.94	-1657.81
9.81567	3114.56	-2190.34	1605.5	8075.31	266.594	1139.75	-1376.81	-770.75	1400.75	4785.69	1333.78	525.312	7249.06	6530.41	2076.38	2842.94	-1815.62
9.81547	1711	-2098.02	2914.5	8226.44	0	269.812	-128.75	-691.781	1853.75	3868.5	1465.69	1850	6594.62	6842.41	2364.5	1709.38	-1637.81
9.81527	69.25	-2160.22	4416.31	7344.19	0	-184.75	483.375	-690.469	2404.25	2692.75	1650.38	2537.19	7051.12	6805.91	1768.75	471.312	-1186.19
9.81507	-718.875	-2252.44	5476.69	6102	19.6562	-141.375	409.938	-942.188	2451.25	2167.25	1721.16	3104.88	8512.81	6668.88	758	1115.44	-516.906
9.81487	-183.125	-2152.03	5747.06	5792.75	539.719	84.1875	-18.625	-1447.25	1739.12	2421.75	1507.38	4185.19	9457.62	6697.66	3.625	2841.19	219.656
9.81467	1336.5	-1813.91	5296.94	6463.5	856.562	126.5	-572.125	-1971.25	825.375	2943.38	1103.91	5470.44	8810.94	6852.38	-506	3314.88	756
9.81447	2924.19	-1409.22	4335.69	6933.38	1062.84	15.4375	-890.25	-2353.41	466.125	3195.88	880.156	5930.56	7242.44	6760.09	-920.875	2003	951.312
9.81428	3666.88	-1179.22	3103.44	6775.31	1419.34	188.875	-596.312	-2749.25	684.75	3104.75	1123.47	5098.44	6198.44	6063.97	-741.5	734.5	974.344
9.81408	3417.5	-1207.84	2079	6850.81	1928.62	918.75	24.4375	-3345.81	848.875	2988.81	1720.53	3667.62	6159.38	4836.62	479.25	1195.25	1077.62
9.81388	2945.19	-1255.47	1964.62	7536.69	2321.59	1846.06	76.0625	-3932.31	655.875	3101.12	2280.12	2637.88	6439.5	3610.53	2004.25	2977.56	1267.59
9.81368	3012.25	-913.688	3012.06	7965.88	2474.09	2329.75	-825.875	-4048.03	507.875	3345.25	2561.38	2295.94	6355.88	2954.88	2480.12	4244.06	1389.59
9.81348	3475.62	-43.2344	4342.31	7665.06	2579.06	2180.69	-1972	-3583.41	740.875	3439.31	2683.78	2316.81	5866.06	3019.19	1650.38	3724.81	1471.81
9.81328	3730.81	1051.22	4482	7435.12	2801.62	1768.12	-2499.69	-2978.47	1084.25	3242.44	2891.41	2449	5145.06	3478.91	735.125	1844.81	1748.81
9.81308	3779.31	2004.77	2972.06	7741	2998.88	1460.25	-2468.81	-2739.19	1282.12	2921.19	3230.03	2639.19	4292.25	3866.62	916.25	45.0625	2338.81
9.81289	4133.44	2774.72	1060.75	7703.81	2961.59	1299.88	-2530.19	-2957.31	1617.38	2878.62	3561.47	2736.31	3661.38	3939.34	1978.75	0	3102.19
9.81269	4735.62	3429.27	251.062	6781.19	2754.47	1234.62	-2892.44	-3388.59	2175.12	3409	3804.12	2613.56	3864.69	3779.03	2751	0	3833.22
9.81249	4814.56	3752.53	448.812	6056.62	2599.78	1275.69	-3172.44	-3785.78	2152.62	4245.94	3979.81	2522.25	5038.62	3594.34	2612.88	0	4397.22
9.81229	4041	3443.75	309.438	6522.62	2539.72	1315.44	-3051.5	-4002.91	818.75	4616.75	4029.25	2851.88	6455.75	3447.06	2175.25	0	4665
9.81209	3097.75	2670.14	0	7298.25	2436.28	1161.31	-2539.81	-3949.03	-1182.12	4099.06	3782.28	3495.25	7282.62	3213.62	2338	4.125	4540.44
9.81189	2732.56	2028.58	0	7086.31	2239.56	936.875	-1703.62	-3651.03	-2497.12	3304.25	3201.38	3847.62	7517.06	2846	2970.25	1270.5	4130.81
9.81169	2809.06	1867.25	0	6414.69	2042.59	1095.31	-643.438	-3295.44	-2820	3189.94	2518.03	3514.69	7762	2581.44	3107.75	1852.88	3716
9.81149	2688.44	1968.02	1888.5	6736.06	1899.91	1737.94	281.812	-3057.56	-2896.38	3666.25	2027.41	2655.06	8174.81	2745.41	2588.12	1964.94	3476.94
9.8113	2098	2014.27	3732.56	7972.75	1792.97	2218.44	682.625	-2944.28	-2919.75	3544.5	1842.28	1532.81	8142.12	3348.25	2635.88	2545.5	3394.22
9.8111	1236.88	2040.36	4309.75	8669.75	1762.16	1837.94	667.688	-2916.59	-2264.75	2166.75	1912.28	170.812	7168.38	4035.25	4063.12	3534.75	3422.09
9.8109	371.438	2212.98	3754.62	8260.38	1878.62	791.562	786.688	-3054.97	-1003.75	458.062	2141.09	-1262	5717.81	4487.84	5617.62	3832.25	3545.09
9.8107	-315.75	2448.95	2495.44	7620.69	2076.91	4.1875	1356.44	-3407.91	-282.75	0	2378.09	-2090.88	4801.12	4725.91	5387.38	3094.75	3616
9.8105	-700.5	2535.27	820.25	7498.94	2218.16	62.875	2121.06	-3725.5	-610.5	305.5	2445.12	-1699.94	4840.19	4931.16	3516.12	2288.88	3396.5
9.8103	-762.562	2462.03	0	7742.75	2346.94	714.562	2645.56	-3573.19	-979.25	950.938	2328.16	-462	5329.88	5137.88	2038.25	2126.94	2894.03
9.8101	-485.75	2370.42	0	8027.44	2667.12	1419.12	2784.12	-2789.28	-384.375	1039.31	2224.25	348.75	5684.62	5261.41	2010.75	2163.56	2444.88
9.80991	277.375	2280.2	0	8208.44	3174.12	1908.5	2652.69	-1707.09	880.375	777.562	2242.81	-154.188	6011.69	5318.81	2444.62	1914.69	2306.28
9.80971	1501.81	2112.75	657.125	8046.69	3527.56	2033.69	2328.5	-844.844	2183.12	468.812	2200.25	-1470.62	6733.44	5407.72	2411.25	1733.44	2350.31
9.80951	2623.38	1898.72	1840.38	7574.69	3451.38	1588.94	1700.25	-432.219	3617.88	128.375	1926.22	-2298.25	7724	5488.09	2428.5	1970	2318.16
9.80931	3010.5	1725.7	1980.25	7453.38	3104.69	715.938	582.125	-275.594	5077.5	131.812	1655.56	-2045.12	8338.5	5384.38	2913.75	2255.12	2180.62
9.80911	2796.06	1544.52	1071.44	7966.81	2851.5	126.375	-997.312	-35.6562	5371.12	1277.81	1833.94	-1401.31	8282.81	5054.56	2911	2244.56	2053.09
9.80891	2622.5	1268.3	0	8155.06	2747.97	368.562	-2589.12	401.906	3667.12	3534.69	2558.09	-1311.44	7917.5	4715.62	1626.75	2181.69	1948.22
9.80871	2526.75	1023.61	0	7192.88	2485.34	1041.19	-3559.5	817.719	1137.12	5395.44	3457.09	-1769.88	7512.19	4630.38	-58.5	2147.81	1865.44
9.80852	1848.38	1051.08	0	6129.75	1857.28	1302.62	-3669.69	917.375	-241.125	5384.62	4122.78	-1988.38	6757.75	4841.88	-989.25	1690	1967.84
9.80832	455.312	1358.22	1462.75	6680.31	1099.31	1094.5	-3287.44	692.188	-102.75	3954.5	4415.66	-1515.25	5504.81	5155.19	-1535.38	853.812	2356.12
9.80812	-727.938	1707.38	3753.75	8538.44	677.062	1210.5	-2888.31	451.969	362.625	3024.56	4345	-687.438	4581.12	5319	-2524.88	666.438	2742.12
9.80792	-814.75	1954.61	5495.56	9616	820.938	2036.38	-2550.81	452.906	499	3649.69	3935.41	-20.75	5085.38	5228.78	-3374.5	1787.31	2673.84
9.80772	52.625	2137.39	5765.75	9047.81	1330	2888.81	-2149.94	584.688	802.5	4958.12	3310.72	325.75	6828.06	5040.19	-3000.12	3425.69	2102.62
9.80752	1128.88	2184.44	4366.12	8283.12	1790.03	2955.81	-1800.69	537.375	1561.25	5587.44	2697.19	371.812	8195.38	5078.84	-1887.25	4365.06	1445.31
9.80732	1825	1846.95	2084.81	8820.88	1952.94	2353.06	-1743.62	215.406	2240.25	5347.81	2243.75	135.938	7935.5	5508.06	-1453	4396.75	1036.81
9.80712	1718.19	1086.25	210.562	10357.1	1946.84	1777.5	-1913.5	-169.188	2388.25	4944.94	1989.25	-104.75	6592.31	6060.75	-1752.62	4033.88	794.812
9.80693	592	296.531	0	11704.4	2132.53	1535.25	-1997.5	-406.156	2098.88	4686.44	2019.66	157.438	5659.19	6241.72	-1624.12	3509.81	527.438
9.80673	-994	-78.3281	203.938	12244.7	2714.75	1478.69	-1902.56	-522.375	1451.62	4281.5	2423.94	989	5632.62	5860.88	-908.125	2849.62	305.812
9.80653	-1838.56	-18.3125	1585.44	11918.3	3482.09	1630.31	-1850.94	-648.5	480.75	3706.88	3036.28	1730.38	5601.94	5234.28	-667	2344.5	322.875
9.80633	-1397.12	153.469	3328.94	10952.4	3972.91	2217.06	-2003.06	-783.5	-241.25	3434.81	3475.47	1805.25	4795.31	4791.22	-1069.88	2197.31	535
9.80613	-447.688	191.094	4917.81	10169.8	3898.78	3094.88	-2246.56	-801.062	-12.25	3638.06	3549.38	1509.56	3807.25	4661.53	-888.75	2180.44	675.5
9.80593	-16.3125	80.2656	5504.94	10489.8	3364.06	3657.31	-2366.31	-637.344	880.625	3815.44	3391.31	1529.88	3789.25	4788.81	414.25	2218.56	602.062
9.80573	-224.375	-89.8125	4502.75	11573	2701.19	3466.44	-2217.12	-371.844	1387.12	3578.5	3097.91	1947.06	4774.19	5236.94	1688	2685.06	476.219
9.80554	-617.062	-167.359	2462	11951.3	2203	2723.94	-1763.81	-120.906	1131	3351.5	2528.28	2271.56	5459.44	6061.41	1902.25	3565.12	570.344
9.80534	-883.562	77.7188	869.625	10967.9	2018.88	2057.69	-1151.88	84.1562	692.5	3747.12	1668.12	2284.19	4731.44	6937	1656.25	4114.12	974.094
9.80514	-699.438	754.141	759.875	9543.88	2138.41	1960	-669.938	273.375	480.25	4443.31	929.125	2200.31	2910.31	7286.69	2050.88	4039.19	1511.44
9.80494	321.688	1632.33	1728.25	8580.19	2338.09	2361.88	-451.688	412.594	431.75	4325.44	775.688	2036.62	1253.12	6919.34	3081	4177.88	1911.72
9.80474	1758.25	2334.45	2570.62	7789.88	2246.12	2692.56	-333.062	379.875	861.375	2962	1164.34	1479.94	639	6276.78	4001.25	5165.25	2054.78
9.80454	2206.19	2744.81	2744.81	6730.31	1654.41	2550.5	-193.125	143.875	2263.38	1474.31	1605.97	551.75	1130.62	5869.41	4531.62	6266.06	2051.78
9.80434	903.062	3030.94	2848.12	5786.06	785.344	2298.44	-205.375	-62.375	3983	1416.44	1706.62	-157.938	2460.38	5693.5	4874.25	6507.38	2074.56
9.80415	-1027.88	3263.23	3615	5301.19	117.688	2534.31	-456.562	113.406	4514.12	2867.19	1437.28	-204.625	4247.62	5459.91	5069.5	6162.81	2126.59
9.80395	-1822.62	3270.7	4825.06	4819.81	0	2934.12	-575.062	753.625	3709.88	4194.31	970.156	145.125	5751.69	5208.56	5068.75	5988.5	2043.44
9.80375	-1036.25	2943.78	5530.88	4123.62	0	2445.69	-164.938	1523.34	3335	3982.12	517.875	318.562	6180.94	5314.34	5118.88	5739.31	1735.41
9.80355	537.312	2435.84	5191.62	4033.88	83.8125	1045.75	599.5	1993.31	4557.38	2734.19	322.5	128.188	5631.5	5886.28	5482.62	4775.06	1378.44
9.80335	2189.25	1931.97	4119.56	5140.75	90.0312	335.438	1297.19	2026.41	6124.12	2083.12	563.531	-138.625	5188.69	6519.47	5961.88	3588	1324.03
9.80315	3457.25	1418.67	2782.25	6596.75	136.375	1464.62	1959.5	1778.16	6152.88	2570.62	1198.06	-83.125	5602.44	6778.09	6078.12	3308.12	1820.34
9.80295	3619.69	838.953	1249	7325.44	288.688	3257.31	2821.5	1463.97	4749.75	3108.5	1998.41	481.188	6280.38	6657.78	5600.38	3995.94	2796.03
9.80275	2407.19	302.906	0	7736.25	484.344	3680.62	3517.38	1275.66	3553.75	2842.5	2763.69	1328.69	6205.75	6390.28	4722.38	4751.12	3871.97
9.80256	945.25	-40.2969	0	8979	687.562	2660.56	3322.88	1374.72	3358.25	2529.19	3416.72	1865.75	5527.62	6023.03	3884.75	5250.88	4600.69
9.80236	692.375	-218.938	93.9375	10917	977.312	1907.75	2302.62	1711.19	3532.38	3218.88	3925.12	1656.38	5407.5	5466.81	3472.88	5799.38	4774.44
9.80216	1565.38	-360.125	2462.06	12096.2	1425.44	2129.5	1433	1912.12	3427.62	4259	4227	957.375	6305.31	4844.62	3458.12	6031	4548.66
9.80196	2295	-513.656	4623.94	11641.9	1959.28	2166.69	1306.44	1627.56	3041.12	3917.81	4225.75	415.188	7265.94	4490.88	3364.5	5107.75	4255.81
9.80176	2442.44	-720.703	5426.94	10195.7	2414.72	1251.44	1431.81	1000.12	2345.5	1978.06	3831.12	254.375	7174.5	4558.97	2809.25	3386.44	4096.66
9.80156	2685.56	-1117.11	4957.62	8938.38	2715.88	443.188	1232.06	528.875	1132.12	436.125	3098.03	253.312	6005.5	4818.59	1905.38	2494.88	4016.78
9.80136	3136.75	-1738.7	3894.44	8433.75	2957.16	962.125	1055.56	431.625	-295.625	1101.94	2364.16	557	4437.19	4907.69	906.5	3339.81	3833.38
9.80117	2906	-2319.34	2676.81	8479.5	3274.28	2376.88	1559.69	424	-1166.12	3432	2078.72	1771.25	2897.88	4675.09	-132.25	5105	3421.34
9.80097	1696.31	-2541.75	1605.81	8557.56	3644.19	3453.38	2530.81	219.969	-1226.5	5453.94	2363.25	3850.06	1603.88	4261.12	-909.75	6514.94	2807.69
9.80077	478.312	-2439.19	1128.81	8422.12	3862.47	3831.88	3032.62	-50	-1032.75	6143.75	2883.28	5527.88	1032.94	3961.09	-724	7031.62	2168.88
9.80057	37.5625	-2289.8	1470.88	8489.75	3763.16	3853.25	2599.12	-109	-1070.5	6036.31	3287.97	5529.5	1581.62	4035.38	424.5	6520.44	1734.06
9.80037	18	-2151.34	2294.81	9350	3421.25	3521.12	1747.62	28.375	-1149	5938.75	3594.62	4033.19	2921.62	4526.84	1153.5	4921.06	1615.47
9.80017	11.6875	-1820.36	3125.38	10683.1	3071.25	2701.75	1329.44	144.469	-832.375	6019.94	3944.31	2340.44	4305.38	5197.56	318	2864.62	1719.38
9.79997	484.375	-1293.94	3840.44	11314.9	2859.25	1804.06	1715.12	185.406	21.5	6092.69	4195.31	1348.38	5344.75	5710.62	-999.125	1697.12	1869.94
9.79978	1809.06	-919.344	4457.25	10771.7	2781.91	1309.38	2554.44	275.656	1328.88	5959.94	4102.75	959.188	5917.12	5905.69	-546.25	2147.19	1997.22
9.79958	3239.38	-908.531	4848.25	9993.38	2855.88	1034.38	3060.5	448.281	2947.38	5344.62	3807.91	820.062	5609.5	5854.88	1992.62	3442.62	2126
9.79938	3723.56	-975.562	5049.44	9828.44	3176.25	599.625	2618	593.438	4539.12	4105	3769.66	912.875	4159.81	5686.34	4378.12	4184.56	2207.56
9.79918	3220.44	-701.062	5399.88	9696.31	3727.06	93.75	1344.12	632.969	5560.38	2706.56	4173.44	1290.19	2416.38	5472.97	4679.38	3708.38	2093.88
9.79898	2548.69	-84.9688	5870	8746	4266.53	-451.688	-30.125	553.062	5640.25	2004.5	4720.34	1754.19	1822.38	5289.22	3441.25	2423.75	1713.69
9.79878	2384.88	505.578	5697.94	7519.62	4527.66	-1523.06	-927	310.938	4924.5	2363.06	5073.75	2017	2614.5	5223.81	2388.88	1351.44	1168.81
9.79858	2909.62	822.297	4371.88	7108.94	4459.59	-3086.12	-1341.25	-96.3438	3992	3305.38	5226.62	1958.38	3446.75	5265.06	2156	1426.75	604.25
9.79838	3899.69	926.094	2676.62	7199.19	4179.81	-3772.38	-1427.19	-509.75	3417.12	4108.75	5314.09	1722.75	3343.44	5276.62	2160.88	2641.94	77.5312
9.79819	4654.69	959.734	2012.5	6555.88	3790.94	-2354.19	-1127.38	-763	3287.75	4428.62	5333.19	1729.88	3158.31	5158.69	1869.62	3774.75	-375.844
9.79799	4392.19	977.578	2778.75	5295.69	3369.94	346.125	-514.188	-947.156	3129.12	4335.75	5239.81	2315.69	4250.94	4974.09	1256.25	3607.75	-633.469
9.79779	3297.38	1008.91	4090.81	4993.31	3021.66	2263.94	-56.5	-1298	2500.75	4129.38	5137.97	3011.5	6359.19	4877	520.625	2441	-549.719
9.79759	2684.69	1079.34	4989.31	6227.88	2753.69	2606.81	-71.5625	-1775.84	1612.38	4176.12	5152.69	2624.62	7892.69	4978.78	51.875	1653.5	-111.25
9.79739	3516.44	1109.41	5218.94	7549.31	2368.41	2364.69	-210.5	-1961.84	951.75	4602.56	5183.66	774.625	8102.81	5292.41	294.5	1787.25	531.781
9.79719	5171.69	937.219	4859.44	7536.12	1703.69	2428.94	54.125	-1490.91	340.875	5125.69	4947.31	-1000.56	7851.88	5714.81	1155	2022.75	1177
9.79699	6250.44	510.734	4003.94	6648.19	968.156	2495.56	707.812	-487.438	-884.25	5483.38	4271.97	-792.062	8116.81	6049.84	1935.5	1673.25	1683.25
9.7968	6204	-26.7969	3022.88	6249.38	605.312	2024.44	1417.19	515.875	-2459.12	5878.06	3308.84	1005	8715.31	6158.91	2138.25	1125.5	2021.28
9.7966	5597.69	-474.109	2506	6778.12	769.844	1163.19	2125.75	1040.28	-2819.75	6481.5	2482.09	1866.12	8900.44	6114	1812.38	947.375	2272.41
9.7964	5124.25	-724.719	2654.94	7763.12	1125.31	373.75	2816.94	1016.31	-936	6644	2213.97	486.75	8484.88	6089.62	961	1057.12	2556.31
9.7962	5003.88	-792.75	3138.44	8853.5	1226.62	-3.6875	2982.12	758.75	2004.88	5410.44	2584.78	-1314.81	7887.38	6086	-528.75	1236.06	2913.03
9.796	5158.56	-788.891	3629.69	9844.81	936.875	407.75	2117.75	635.906	3629.38	3052.88	3226.12	-1047	7544.81	5907.56	-1999.38	1542.25	3265.78
9.7958	5401.69	-869.125	3987	10199.6	416.562	1749.44	695.125	732.406	2858.38	1328.25	3638.28	1120.62	7664.25	5449.22	-2089.38	1716.69	3517.94
9.7956	5502.38	-1081.06	3869.38	9541.88	0	3236.62	-116.25	832.094	649.625	1668.38	3633.75	2878.62	8157.5	4828.28	-413.5	1097.12	3646.28
9.79541	5406.06	-1230.5	2846.69	8450.5	0	3575.5	224.125	736.781	-1411.62	3541	3384.69	3048.19	8527.69	4168.66	1603.25	0	3666.75
9.79521	5265.94	-1032.25	1126	7975.25	0	2412.12	1204.5	513.5	-2377.75	5087.62	3075	2650.56	8274.25	3464.44	2352.75	0	3568.78
9.79501	5055.69	-475.234	0	8414	105.688	701.188	2163.56	343.219	-1996.75	5092.38	2702.41	2710.38	7689.31	2788.91	1883.88	0	3360.06
9.79481	4472.25	64.9688	0	9139.81	547.406	-573.5	2858.69	231.25	-585.125	3921.12	2280.69	2706.25	7690.06	2431.38	1399.5	243.688	3154.28
9.79461	3503.56	199.391	0	9545.44	951.125	-1316.31	3034.62	46.7188	916.375	2806.56	2042.41	1897.06	8459	2599.03	1592.12	1409.94	3127.31
9.79441	2711.12	-15.3438	214.125	9630	1505.34	-1776.75	2324.56	-187.531	1526.62	2659.62	2271.88	873.5	8878.25	3093.84	2347.62	2411.31	3353.62
9.79421	2600.38	-91.0156	1546.81	9707.5	2342.94	-1941.94	987.75	-255.625	1168.62	3421.19	2977.75	714.625	7923.69	3498.19	3547.88	3336.44	3717.59
9.79401	3074.12	398.516	2422.75	9994.31	3208.19	-1834.94	-17.3125	-48.0938	562	4218.56	3818.16	1378.5	6065.56	3622.22	5138.75	3915.25	4011.16
9.79382	3854.25	1385.42	1755.44	10446	3665.28	-1678.75	-241.25	266.375	139.625	4250.25	4346.78	1988.38	4532.12	3597.81	6592.5	4162.88	4121.56
9.79362	4991.94	2379.56	0	10633.6	3580.28	-1380.62	-390.688	452.312	-315.75	3728.88	4345.25	2238	3683	3610.69	7135	4835.5	4131.19
9.79342	6478.81	2925.12	0	9942.44	3222.91	-545.062	-1161.19	471.781	-920.5	3721.25	3987.62	2480.25	3067.69	3724.88	6497.12	6244.38	4229.56
9.79322	7760.81	2953.55	0	8352.5	2946.69	634.375	-2016.5	454.031	-1302.62	4805.5	3674.44	2700.5	2712.62	3911.22	4983.88	7260.19	4499.84
9.79302	8226.62	2719.11	0	6875.44	2926.09	1233.38	-1911.81	495.438	-1172.12	6186.81	3629.59	2470.69	3118.38	4062.19	3026.88	6597.62	4789.22
9.79282	7932.75	2476.91	0	6640.19	3120.25	812.688	-814.062	573.188	-680.25	6517.69	3688	1920.31	3975.94	4044.38	1106	4660.31	4832.12
9.79262	7369.38	2292.45	0	7558.88	3265.34	86.5625	377.75	601.219	-54.75	5405.12	3573.72	1766	4131.44	3921.03	-211.625	3036.5	4518.97
9.79243	6815.12	2132.73	112.438	8467.25	2945.47	-156.625	1193.44	510.812	530.75	3739.88	3309.5	2151.88	3195.81	4029.44	-619.625	2459.62	3998.41
9.79223	6445.38	2026.45	756.062	8630.44	1952.22	-134.062	1922.06	315.688	655.25	2675.44	3166.69	2302.5	2167.62	4585.91	-233	2312	3497.72
9.79203	6706.25	2070.64	1111.25	8479.69	646.844	-417.812	2600.94	122.281	-22.25	2606.81	3249.56	1690	2007.44	5278.56	781.75	1952.75	3110
9.79183	7842.19	2331.95	1369.62	8680	0	-785.688	2673.94	24.5312	-959.125	3042.38	3364.25	833.375	2537.31	5554.88	2179.75	1477.81	2801.19
9.79163	9175.69	2793.53	2110.69	9161.19	0	-533.562	1986	-6.59375	-1093.25	3197.88	3325.75	471.438	3261.88	5313.66	3072.25	1176.44	2551.38
9.79143	9541.44	3346.44	3093.25	9525.31	0	360.062	1292.81	-44.4062	-342.5	2798.88	3164.06	536.875	4278.44	4996.75	2346.25	1171.62	2406.75
9.79123	8486.69	3771.52	3340.12	9865.19	128.781	1137.25	1257.94	-21.4375	109.875	2445.5	2968.88	559.625	5623.69	4945.75	215	1655.69	2437.72
9.79104	6582.94	3789.47	2722.5	10538.7	93.125	1240.81	1558.31	250.656	-491.625	2945.31	2758.25	678.562	6621.44	5022.34	-1573.12	2653.44	2716.84
9.79084	4625.25	3243.73	2403.81	11418.8	0	826.562	1575.94	833.719	-1338.5	4127	2582.97	1539.12	6823.81	5016.25	-1816.75	3496.75	3263.06
9.79064	3034.5	2250.88	3152.75	11991.9	37.0625	346.438	1453.44	1544.84	-1273	4736	2529.69	3260.75	6876.69	5092.81	-1203	3348	3885.97
9.79044	1972	1121.19	4091.56	12060.8	220.625	98.6875	1669.75	2129.47	-379.625	3880.25	2516.81	5064.31	7431.81	5535.66	-735.25	2368.38	4159.31
9.79024	1445.75	145.562	3898.19	11798	521.281	198.125	1850.12	2439.09	459.25	2190.56	2333.16	6034.5	7859.44	6236.97	-4.625	1621.25	3775.69
9.79004	1184.69	-501.375	2688.44	11247.5	922.594	600.438	969.938	2400.78	948.875	1051.38	2023.28	5945.94	7209.5	6751.03	1609.88	1682.31	2988.09
9.78984	821.5	-726.812	1870.56	10435.2	1301.53	1069.56	-1057.81	1988.34	1340.75	994.625	1991.84	5277.94	5915.38	6805.88	3082.5	2059.88	2508.06
9.78964	288	-526.969	2366.31	9909.81	1454.66	1321.69	-2783.44	1368.97	1459	1436.69	2525.28	4626.69	5190.31	6545.19	2957.12	2142.69	2815.06
9.78945	-241.188	-32.4219	3661.19	10343.9	1349.69	1242.62	-2727.81	950	890.875	1745.38	3407.88	4154.69	5076.94	6301.19	1857	1972.62	3660.31
9.78925	-706.625	572.875	4563.75	11385.9	1241.69	924.312	-1088.56	1062.66	12.25	1873.5	4199.25	3538.62	4586.94	6302.62	1742	1792.94	4375.88
9.78905	-1136.06	1205	4408.5	11708.4	1421.38	609.312	553	1583.94	-242.25	1997.62	4667.5	2515.5	3655.69	6571.88	2799.38	1498.25	4579.75
9.78885	-1426.06	1856.45	3537.38	10664.9	1893.66	626.5	981.375	2012.62	267.25	2167.56	4722.84	1474.69	3311.5	6932.91	3180.12	924.812	4415.75
9.78865	-1564	2408.42	2963.44	9222.44	2403.47	1120.12	308.188	1960	690.5	2379.31	4206.31	1202.62	3661.81	7110.31	2125	209.625	4176.72
9.78845	-1852.38	2604.98	3501.5	8634.81	2758.03	1698.31	-650.375	1491.66	551.375	2540.12	3150.44	1865.31	3380	6950.62	1249.62	0	3941.88
9.78825	-2382.88	2300.86	4912.12	8745.56	3009.16	1596.75	-1318.06	978.188	458.25	2430.19	2116.22	2597.56	1810.31	6577.12	1871.5	0	3657.91
9.78806	-2523.31	1655.3	5998.5	8419.12	3273.78	423.875	-1542.31	700.562	1062.5	2158.94	1811.09	2485.38	79.375	6273.19	2913.75	0	3386.16
9.78786	-1639.75	1005.2	5842.31	7336	3471.69	-1356.44	-1395.25	643.688	1994.75	2457.5	2308.56	1703.12	-717.562	6241.81	2742.62	0	3297.81
9.78766	-197.812	600.672	4806.5	6463.94	3363.53	-2808.88	-1187.94	607.188	2347	3847	2976.22	1205.31	-995.25	6513.88	1669.38	1608.69	3471.31
9.78746	719.625	503.25	3991.69	6732.19	2861.06	-3327.44	-1389.56	437.531	1801.38	5627.44	3252.31	1451.31	-1247.44	6991.75	1101.38	3336	3811.28
9.78726	1022.25	636.031	3871	7937.69	2208.62	-3046.12	-2106.06	137.094	861.75	6460.5	3197.88	1985.5	-521.188	7481.56	1125.25	4284.12	4168.06
9.78706	1738.56	835.391	3893.44	9092.75	1798.16	-2570	-2735.38	-201.781	242.25	5953.31	3179.03	2260.69	2080.31	7762.56	558	4639.31	4464.59
9.78686	3208.81	934.094	3359.19	9344.69	1837.16	-2285.75	-2488.81	-491.812	325.375	4897.75	3304.19	2285.62	5261.94	7753.69	-943.75	4941.12	4691.56
9.78667	4182.38	912.406	2228.81	8505.31	2238.06	-1894.31	-1242.94	-630.469	949	3974.19	3392.59	2284.5	6682.75	7572.47	-2214.12	5006.44	4816.22
9.78647	3442.94	916.062	1029.88	7158.19	2773.34	-827.062	369.25	-443.031	1477	3195.25	3320.47	2230.81	5928.31	7357.28	-2093.75	4163.81	4737.06
9.78627	1563.12	1015.7	337.062	6274.62	3243.38	781.188	1649.5	221	1360	2750.81	3161.97	2062.31	4784.88	7123.38	-701.125	2534.44	4374.53
9.78607	123.812	1025.05	380	6275.5	3499.91	1969.94	2314.5	1271.41	865.875	3199.69	3032.16	2047.44	4639.31	6890.12	902.875	1296.25	3829.5
9.78587	-294.75	736.625	822.75	6512.12	3436.22	2145.12	2332.81	2334.62	940	4287.19	2960.16	2582.12	5061.5	6809.03	1688.75	1261.25	3380.22
9.78567	-306	311.281	935.125	6164	3060.06	1891.75	1678.38	3026.94	2054.88	4661.25	2943.41	3725.12	5114.75	6976.47	1303.88	1737.69	3211.69
9.78547	-194.375	202.172	364.5	5487.81	2552.03	2004.38	416.812	3274.16	3513.88	3605.44	3037.75	5107.25	4748.44	7212.22	282.375	1515.69	3182.59
9.78528	541	600.484	0	5456.75	2155.66	2216.44	-1180.81	3326.91	4253.25	2222.81	3324.19	6186.25	4492.06	7238.5	-358.375	769.812	3019.34
9.78508	1877.31	1139.38	0	6200.12	1969.84	1768.56	-2743.81	3480.19	4078.25	1995.25	3751	6536.06	4739.94	7029.75	-61.5	1027.12	2752.28
9.78488	2637.75	1298.98	918.375	6706.38	1887.91	848.812	-3911.69	3806.72	3671.25	2867.19	4035.12	6129.31	5675.62	6766.91	817.625	2884.12	2749.09
9.78468	1934.94	981.125	1794.19	6322.12	1767	345.125	-4393.56	4123.62	3546.5	3724.19	3841.91	5454.06	7121.56	6493.62	1648.75	4630.81	3203.78
9.78448	614.188	505.406	2034.31	5670	1607.72	327.188	-4209.25	4166.72	3522.12	4114.81	3161.09	5095.69	8289.44	6092.41	2228.5	4073.19	3787.72
9.78428	382	131.875	2202.69	5602.31	1500.75	31.6875	-3869.5	3818.31	3250.38	4326.19	2425.09	5061.38	8450.38	5620.41	2600.5	1326.81	4005.97
9.78408	1693.06	-162.578	2802.75	5953.25	1429.97	-577.875	-3900.38	3224	2783.12	4227.44	2125.5	4791.19	7906.44	5359.88	2754.25	0	3765.38
9.78388	3281.31	-425.578	3286.56	5962.38	1253.72	-576.062	-4044.62	2681.97	2357.12	3403.38	2351.72	3987.06	7483.94	5410.66	2976.5	0	3352.84
9.78369	3852.25	-521.969	2918	5455.69	939.125	283.5	-3387.88	2378.78	1898.12	2322.25	2815.41	3070.88	7190.62	5492.44	3869.88	0	2953.31
9.78349	3552.06	-351.25	2072.44	4983.25	716.719	1018.62	-1599.19	2233.31	1079	2058.94	3250.41	2540	6479.25	5346.38	5319.38	0	2491.94
9.78329	3430.12	-110.312	1732.44	5054.44	877.125	1071.75	350.625	2023.88	-139.375	2736.25	3619.31	2239.5	5709.19	5139.56	6042.88	0	1951.03
9.78309	3938.62	-122.297	1962.31	5714.12	1439.34	1273.44	1196.62	1638.31	-1232	3419.94	3974.25	1725	5806.81	5250.81	5143.88	11.4375	1523.78
9.78289	4510.56	-448.203	1942.88	6666.31	2121.31	2406.88	851.812	1155.19	-1487.88	3745.88	4317.31	1082.19	6240.19	5786.22	3668	613.438	1354.44
9.78269	4490.38	-854	1555.5	7449.31	2618.41	3898.5	318.312	704.562	-658.625	4398.5	4609.84	797.812	5129.88	6523.16	3425	390.25	1392.06
9.78249	3967.31	-1156.91	1839.69	7689.06	2794.28	4764.88	256.938	328.375	801.625	5572.44	4756.38	882.062	2198.31	7221.75	4430.25	0	1635.22
9.7823	3501.62	-1408.12	3443.62	7439.12	2626.38	4898.94	323.188	-4.1875	2143.75	6232.44	4588.66	744.562	-79.0625	7740.97	4839.62	0	2253.75
9.7821	3291.94	-1669.45	5489.88	7056.62	2159	4613.5	50.5625	-303.812	2924.88	5652.75	4058.12	99.3125	420.062	7908.56	3614.75	0	3246.12
9.7819	2922.19	-1795.59	6614.5	6628.69	1588.25	3901.88	-283.125	-533.531	3182.62	4660.69	3447.47	-552.25	2574.75	7579.12	1920.25	0	4178.78
9.7817	1999.56	-1593.75	6527.5	5929.44	1225.5	3017.81	-135.5	-656.344	3126.12	4455	3167.41	-673	3807	6892.97	1289.5	0	4548.97
9.7815	889.188	-1100.48	5892.38	5054.81	1224.16	2753.56	371.188	-678.656	2879.25	5021.88	3285.53	-521.5	3633.69	6250.38	1553	0	4315
9.7813	548.688	-525.469	5173.19	4490.56	1420.09	3146	607.5	-650.094	2603.12	5662.75	3463.91	-791	3520.62	5911.78	1510.5	433.438	3831.59
9.7811	1448.88	46.375	4397.75	4290	1549.72	2985.12	430.188	-639.906	2647.12	6311.94	3435.97	-1631	3905.56	5767.81	855.125	603.688	3350.81
9.78091	2807.25	717.188	3772.62	3859.25	1536.81	1781.69	458.312	-698.906	3294.38	7170.62	3322.19	-2488.06	3615.69	5590.22	381.875	418	2858.31
9.78071	3276.56	1504.39	3676.62	3016.5	1456.44	1089.12	1195.62	-812.219	4334.38	7614.06	3352.41	-2854.94	2297.5	5351.41	697.5	965.938	2353
9.78051	2485.31	2167.16	4022.19	2583.38	1353.06	2347.25	2283.38	-886.5	5104.25	6847.19	3494.56	-2725.12	1347.5	5168.97	1653.25	2380.62	1962.03
9.78031	1505.94	2413.3	4277.44	3273	1292.28	4403.88	2937.25	-823.906	5091.12	5441.25	3564.16	-2235.62	1764.06	5075.78	2796.75	3235.12	1708.62
9.78011	1539.69	2195.98	4187.44	4545.12	1489.38	5042.69	2894.5	-637.375	4422.38	4825.62	3561.91	-1325.56	2693.12	5027.62	3555.12	2579.25	1454.28
9.77991	2510.69	1697.3	3911.19	5330.5	2097.09	4294.06	2540.94	-468.781	3665.75	5135.94	3666.59	-32.75	3012.06	5069.75	3228.62	1435.5	1223.62
9.77971	3390.44	1080.16	3408.69	5509.25	2836.25	4121.75	2163.5	-455.656	3235.75	4924.44	3910.91	1193.5	3119.75	5298.81	1720.62	1235.94	1354.38
9.77951	3595	399.734	2356.75	5868.31	3114.44	5074.12	1533.69	-595.344	3149.62	3481.44	4034.84	1897.38	4070.81	5646.97	161.125	1729.88	2096.44
9.77932	3411.88	-245.219	907.562	6825	2647.72	5473.31	431.562	-787.438	3293.62	2208.44	3712.47	2209.62	5722	5849.09	-148.625	1789.31	3178.16
9.77912	3157.38	-641.172	0	7982.69	1781.19	4255.5	-770.062	-992.094	3607	2813.62	2886.94	2634.5	6810	5677.16	562.125	1641.75	3996.41
9.77892	2696.88	-649.406	93.5625	8895.88	1049	2607.06	-1432.81	-1256.97	3871.5	4961.38	1896.47	3281.94	6550.44	5135.59	854	2602.88	4211.5
9.77872	2004.19	-394.375	1040.5	9588.69	583.406	2040.5	-1419.81	-1547.75	3654	6707.69	1272.81	3764.75	5416.62	4428.66	205.125	4559.56	3977.56
9.77852	1480.62	-143.797	1899.62	10251.2	155.375	2443.88	-1154.62	-1628.28	2858.38	6832.75	1335.09	3945.12	4538.19	3842.75	-266.875	5395.25	3599.72
9.77832	1280.69	-10.6719	2254.62	10911.1	0	2867.19	-970.25	-1209	2176.62	5811.5	1936.38	4246.25	4803.94	3672.62	363.375	3696.69	3175.94
9.77812	874.938	132.453	2236.56	11452.8	0	2907.06	-817.375	-236.406	2450.25	4696.62	2652.16	4871.5	6270.88	4122.53	1342	902.938	2673.5
9.77793	-126.562	438	1905.06	11644.4	0	2443.5	-641.188	999.125	3503.25	3963.5	3195.12	5162.88	8016.31	5166.09	1341.38	0	2198.19
9.77773	-1077.38	885.328	1095.88	11242.8	138.188	1178.25	-568.938	2071.09	4165.88	3546.12	3548.28	4330.44	8828.44	6515.47	270.625	756.5	1982.53
9.77753	-901.938	1343.72	0	10388.4	789.094	-565.75	-559.312	2763.62	3741.88	3257.06	3751.97	2633.12	8395.62	7761.19	-884.75	2408.5	2103.31
9.77733	488.688	1745.3	0	9708	1340.47	-1456.25	-352.062	3238.81	2918	2871.12	3777.94	1187.31	7534.31	8547.72	-1419.25	2984.88	2362.84
9.77713	1967	2113.66	0	9700.25	1787.75	-533.5	-51.9375	3816.5	2722.12	2270.38	3647.09	568.812	6996.88	8705.72	-1167	2703.88	2529.22
9.77693	2449.25	2470.77	0	10218.6	2195.44	1551.62	-272.25	4519.03	3011.75	1772.25	3453.09	236.312	6527.75	8370.28	69.875	2714.88	2600.03
9.77673	1973.44	2800.88	1428.75	10824.4	2608.69	3335.5	-1237.44	4887.69	2719	1970.69	3194.41	-424.562	5529.06	7968.75	2203.38	3339.06	2721.16
9.77654	1435.06	3073.66	2845.62	11297.8	3054.34	4001.06	-2168.25	4417.38	1411.25	2998	2792.78	-1065.31	4203	7896.94	4138.38	4004.38	2910.03
9.77634	1617.5	3213.25	3944.56	11483.1	3514.81	3515.06	-2197.25	3205.31	-179.625	4204.62	2353.16	-875.688	3407.5	8105	4507.62	4367.94	3018.19
9.77614	2622.69	3074.94	4430.62	11129.1	3879.44	2056.12	-1626.12	1990.25	-1235.5	4786.81	2144	176.062	3576.12	8141.41	3289.88	4561.75	2981.38
9.77594	3957.5	2585.89	4430.62	10388.1	4009.25	87.4375	-1521.06	1432.81	-1717.5	4529.19	2185.72	1130.69	4336.5	7712.25	1873.38	4451.75	2944.59
9.77574	4942.06	1939.19	3569.62	10019.6	3883.66	-1474.12	-2126.88	1494.56	-1938.5	3791.56	2143.59	1078.81	5122.06	7058.09	1404.88	3592.75	3057.09
9.77554	5157.31	1521.02	2479.38	10485.4	3612.97	-1891.94	-2482.31	1652.47	-1940.62	3079	1834.19	123.25	5695.25	6639.06	1841.38	2177.5	3271.5
9.77534	4709.88	1556.28	1913.69	11219.1	3267.62	-1245.62	-1783.75	1565.5	-1683.88	2900.38	1550.94	-742.312	6054.75	6600.12	2627	1274.38	3467.97
9.77514	4128.5	1886.69	2052.19	11381.6	2776.03	-140	-430.562	1316.72	-1355	3716	1598.88	-586.5	6187.81	6755.09	3330.38	1640.06	3677.38
9.77495	3941.75	2158.34	2279.38	10925.2	2075.88	864.562	598.5	1109.31	-1102.12	5470.38	1778.66	596.062	6026.88	6980.88	3444.75	2786.62	4018.72
9.77475	4216.56	2149.52	1673.62	10289.5	1314	1386.56	818.062	1010.28	-850.25	7205.31	1722.38	1923.62	5538.38	7337.38	2604.62	3687.62	4448.19
9.77455	4388.12	1836.73	1673.62	9570.12	792.656	1400.94	321.812	1016.25	-694.5	7690.69	1524.12	2619.12	4875.56	7805.53	1416.75	3959.44	4727.94
9.77435	3675.44	1250.48	1743	8816.38	727.469	1509	-635.875	1143.22	-1038.62	6704.75	1550.81	2903.06	4397.69	8194.47	1103.62	3824.88	4664.66
9.77415	1971.94	452.578	2098.25	8652	1122.34	2337.25	-1622.06	1378.41	-1959	5352.44	1734.62	3562.31	4280.31	8397.12	1783.38	3342.19	4275.03
9.77395	304.125	-350.188	2015.81	9541.94	1821.56	3429.19	-2002.25	1674.41	-2857.5	4826.69	1620.44	4591.94	4130.75	8526.59	2048	2390.06	3709.91
9.77375	-35	-863.188	1456.06	10747.7	2555.91	3584.31	-1524.19	1998	-3155.62	5130.88	1176.09	4831.88	3479.25	8693.66	962.25	1249.69	3128.31
9.77356	1016	-976.625	1269.56	11137.4	2992.12	2633.88	-715.562	2236.59	-2899.62	5380.88	1002.06	3366.62	2763.62	8830.22	-449.5	546.25	2671.72
9.77336	2090.88	-876.781	2088.06	10898.1	2959.28	1863.44	-217.312	2098.31	-2256	5115.94	1499.75	881.812	3127.12	8845.12	-685.625	626	2460.47
9.77316	2014.5	-787.578	2088.06	11261.9	2689	2091.25	61.75	1358.62	-966	4751.19	2273.22	-964	4783.38	8784.62	28.125	1412.62	2557.44
9.77296	1194.69	-689.531	1063.94	12470.8	2636.72	2400.56	608.125	259	1028.12	4768.31	2677.81	-1344.06	6254.25	8692.69	253.625	2680.25	2961.97
9.77276	922.062	-425.719	0	13208.4	2944.28	1687.69	1307.62	-583.375	2885.75	5087.19	2639.84	-887.125	6036.62	8432.75	-353.125	3967.38	3619.62
9.77256	1639.06	-27.875	0	12411	3234.84	525.188	1446.75	-787.281	3646.25	5477.25	2586.69	-619.188	4610.25	7800.66	-615.875	4522.56	4375.12
9.77236	2573	247.719	0	10668.8	3074.75	286.625	777.062	-564.875	3450.25	6048	2798	-908.188	3827.94	6761.59	245.625	4063.38	4967.41
9.77217	2950.5	247.328	0	9377	2493.09	1051.38	27.75	-396.969	3143.12	6893.38	3189	-1506.5	4441.44	5504.72	1507.12	3402.94	5202.59
9.77197	2832.19	119.75	0	9225.19	1880.78	1677.44	121.562	-553.75	2875.25	7621	3600.97	-2012.38	5261.25	4349.62	2157.12	3519.31	5128.81
9.77177	2601.69	81.1094	0	9916.38	1520.16	1653.81	1202.25	-1028.09	2087.12	7748.56	3958.5	-2054.31	4968.44	3634.69	2290.38	4113.19	4911.5
9.77157	2272.75	96.4844	0	10728.8	1426.91	1620	2594.75	-1688.69	865.125	7355	4184.31	-1501.62	3793.81	3508.5	2650.12	4008.62	4545.09
9.77137	1695	-44.9062	139.875	10983.3	1539	2065.44	3467.25	-2290.69	231.5	6853.12	4236.53	-771.938	2842.31	3706.88	3323.12	2998.62	3867.91
9.77117	1118.31	-386.812	2362.44	10464.7	1773.94	2618	3427.31	-2517.72	755.875	6308.94	4213.28	-540.812	2440.75	3713.84	3578.12	2264	2915.97
9.77097	1152.69	-717.312	2362.44	9680.12	1916.16	2809.19	2758.56	-2267.41	1736.38	5551.06	4198.16	-873.938	1935.69	3335.66	2932.62	2693.44	2057.62
9.77077	2155.94	-847.469	3357	9314.5	1721.59	2674.5	2228.25	-1825.06	2159.25	4818.5	4052.91	-1018.44	883.812	2988.69	1940.62	3744.62	1613
9.77058	3726.19	-824.156	5503.88	9378.06	1197.34	2368.5	2436.12	-1575.47	1769.25	4603.56	3610.25	-381.312	-232.75	3215.34	1701.25	4387.88	1456.44
9.77038	4821.88	-805.656	5503.88	9391.56	591.062	1872.56	3202.44	-1606.62	872.5	4782.38	3054.91	622.75	-542.688	4020.5	2576.75	4327.75	1178.88
9.77018	4634.5	-869.688	5728.25	9358.12	76.1875	1289.06	3780.56	-1722.75	-137.75	4595.75	2852.38	1095.31	340.188	4915.34	3576.62	3828.25	601.125
9.76998	3589.25	-1034.53	5158.44	9833.69	0	857.062	3762.12	-1719.38	-639.875	3727.25	3247.12	789.25	2012.5	5538.28	3361.5	3138.06	-50.0312
9.76978	3182.56	-1319.16	4290.12	10954.6	0	515.688	3519.44	-1475.5	8.25	2784.44	4027.38	295.188	3567.75	5960.34	1901.75	2615.69	-471.031
9.76958	4327.25	-1618.81	4290.12	12127.5	0	-64.9375	3584.56	-925.75	1471.25	2396.38	4830.5	224.75	4167.94	6379	651.375	2669.88	-594.812
9.76938	6054.62	-1634.7	4271.44	12832.6	123.75	-910.375	3847.5	-197.562	2299.38	2430.69	5486.56	616.75	3647.31	6779.19	807	3045.19	-488.375
9.76919	6524.19	-1166.77	3066.44	13063.5	756.75	-1634.12	3670.44	312.25	1513.38	2521.31	5994.12	1120.38	2732.75	6993.94	1954.12	2933.5	-91.0625
9.76899	5259.31	-479.125	2343.75	12878.6	1085.94	-1944.81	2704.31	282.625	-148	2784.62	6342.41	1432.62	2500.88	6927.47	2896.62	2315.69	736.625
9.76879	3591	-152.875	2343.75	12256.5	1104.72	-1838.69	1320	-110.938	-1209.62	3411.25	6482.72	1541.06	3387.25	6631.22	3218.88	2263.62	1883.97
9.76859	2775.06	-481.719	1861.38	11550.7	1115.75	-1314	214.812	-366.188	-1203.12	3991.75	6390.28	1787.19	4716.06	6268.03	3255.88	3196	2883.5
9.76839	2610.81	-1150.11	1135.44	11319.1	1364.41	-396.625	-232.938	-266.75	-727.75	3954.06	6083.53	2630.12	5372.5	6023.44	3034.88	3870.62	3291.72
9.76819	2384.5	-1592.73	1135.44	11507.8	1834.56	531.625	-214.875	-86.9688	-242.875	3418.31	5645.59	4038.38	5014.44	5923.69	2306.75	3199.31	3158.81
9.76799	2258.81	-1547	1296.31	11512.3	2305.44	970.625	-272.812	-138.781	312.125	2935.56	5231.25	5156.94	4470.94	5728.62	1427.75	2159.62	2993.34
9.7678	2831.69	-1146.97	1375	11188	2506.91	985.812	-857.188	-366.562	931.875	2558.06	4944.09	4983.38	4772.44	5169.28	1103.88	2465.56	3219.38
9.7676	3861.88	-599.594	454	10986	2325.84	1190.81	-1920.25	-520.719	1392.75	1904.62	4703.56	3508.12	5918.5	4342.78	1216.88	3889	3751.12
9.7674	4452.12	35.8281	454	10903.2	1971.31	1905	-2852.31	-530.219	1606	1107.88	4374.91	1890.5	6915.38	3724.09	968.75	4489.5	4133.62
9.7672	4347.88	744.922	0	10213	1842.44	2737.25	-2977.38	-507.25	1512.62	922.5	4041.75	1338.44	6997.31	3717.12	321.75	3377.94	3993.59
9.767	4160.88	1402.64	1383.06	8616.31	2127.88	3150	-2263.88	-483.438	850.75	1694.31	3955.81	2016.75	6361.62	4289.41	163.125	1756.12	3289.72
9.7668	4302.62	1838.3	1383.06	6892.88	2614.44	3070.19	-1421.81	-343	-314.25	2825	4138.12	3157.62	5529.19	5062.31	733.375	1066.38	2263.22
9.7666	4522.94	2029.83	1577.69	6023.38	2963.25	2782.06	-1084.69	-28.0312	-1135.62	3517.81	4220.88	3971.5	4501	5625.56	1105.12	1466.38	1312.12
9.7664	4628.44	2137.48	2390.62	6296	3053.31	2530.62	-1012	327.75	-876.25	3573.56	3833.91	4241.38	3051.44	5755.94	806.625	2454.19	850.75
9.76621	4841.81	2286.86	3829	7460.88	2970.75	2389.56	-468.375	537.688	4.75	3212.31	3014.59	4253.94	1543.31	5529.56	735.25	3738.06	1094.75
9.76601	5128.88	2369.42	3829	8952.44	2828.25	2288.94	591.438	586.719	596.25	2595.06	2083.97	4435.5	768.312	5309.22	1487	4954	1928.88
9.76581	4895.12	2182.02	4418.44	9774.06	2742.62	2068.62	1224.31	646.781	1126.88	1886.31	1252.28	4958	945.438	5465.94	1834.5	5563.5	3057.78
9.76561	3857	1790.47	2939.12	9154.62	2837.84	1701	694.062	850	2612.75	1424.31	559.875	5480.25	1416.38	6008.38	276.25	5645.38	4256.41
9.76541	2677.19	1595.66	2939.12	7714.81	3063	1490.12	-479.125	1102.56	4869.25	1388.56	114.281	5379	1472.56	6591.25	-2456.12	5979.75	5375.44
9.76521	2161.06	1894.23	2725.62	7025.88	3106.12	1819.19	-1221.38	1193.09	6226.12	1453.81	85.375	4456.44	1049.44	6932.5	-3920.75	6807.56	6182.12
9.76501	2192.56	2471.59	2365.38	7569.62	2708.44	2662.44	-1371.56	1051.38	5718.25	1141.5	386.812	3300.75	456.688	7068.19	-2958.25	7239.5	6414.78
9.76482	2054.56	2825.81	496.25	8107.62	2026.62	3551.56	-1710.31	780.438	4411.5	502.25	591.594	2666.38	-107.312	7144.94	-887.375	6405.38	6045.22
9.76462	1521.81	2753.66	496.25	7551.69	1501.78	4034.44	-2568.25	444.094	3827.75	181.562	342.438	2615.69	-466.875	7185.25	462.25	4532.25	5346.97
9.76442	983.375	2499.84	956.75	6377.44	1399.31	3993.94	-3223	15.6562	3993.62	706	-234.594	2632.81	-254.062	7202.97	740.75	2470.75	4659.91
9.76422	644.062	2329.39	2761.19	5509.5	1644.31	3580.94	-2935.38	-382.156	3906.88	1796.94	-655.031	2488.38	777.438	7344.66	675.5	873.25	4186.25
9.76402	355.188	2205.41	2929.06	4910.5	2063.97	3053.5	-1877.88	-420.594	3189	2551.25	-568.75	2449.12	2311.38	7695.31	735.625	252.375	3989.75
9.76382	289.5	1971.92	2929.06	4231	2584.03	2610	-672.812	17.9375	2306.12	2432.69	-24.1562	2550.69	3646.94	8060.72	982.5	982.812	4006.91
9.76362	987.125	1621.66	3277.31	3930.56	3166.16	2177.81	317.562	502.469	1645	1974.44	705.969	2323.44	4338.5	8155.81	1602.62	2603	4025.03
9.76343	2354.25	1237.86	2245	4601.44	3720.47	1509.56	790.125	436.75	1316.88	2131.19	1401.75	1637.56	4512	7938.53	2711.12	3847	3831.69
9.76323	3257.38	851.062	2245	5755.62	4128.53	720.812	353.688	-223.969	1550.5	2865.56	1964.78	1236.12	4575.31	7569.31	3805.38	4046.25	3453.09
9.76303	2740.25	507.531	483.75	6350.5	4257.88	462.375	-659.688	-898.469	2344.88	2933.75	2361.44	1743.88	4752.38	7118.81	4072.88	3842.38	3099.03
9.76283	1336.19	328.5	582.25	6173.44	3973.69	1125.88	-871.688	-1057.41	2925.12	1500.06	2625.09	2506.44	4937.5	6533.66	3248.5	3919.25	2849.34
9.76263	548.25	344.344	990.125	5856.31	3270.25	2081.75	604.125	-733.906	2487.25	0	2857.78	2268.31	4950.38	5866.56	1769	3905.56	2596.34
9.76243	1120	405.469	990.125	5859.88	2386.25	2282.88	2588.62	-290.844	1477.5	0	3093.47	925.188	4811.69	5331.53	144.375	3410.38	2340.66
9.76223	2339.06	410.172	298.562	6186.19	1663.34	1586.94	2892.25	53.4375	1259.62	0	3164.84	-289.625	4605.12	5105.12	-1402.12	3262.5	2274.5
9.76203	3020.62	478.453	2061.44	6771.94	1283.34	890.062	968.188	284.625	2334.75	0	2845.31	-518.688	4108.31	5208.47	-2667	4424.5	2429.78
9.76184	2672.06	733.625	2061.44	7511.19	1219.03	883.625	-1440.81	363.906	3637.88	0	2178.66	-267.625	2960.38	5565.47	-3298.12	6181.62	2497.75
9.76164	1683.12	1062.56	4478.62	8192.88	1366.62	1279.12	-2427.5	192.406	3864.75	0	1555.81	-266.5	1438	6008.62	-3150.38	6793.94	2224.47
9.76144	960.5	1294.73	3112.44	8837	1577.66	1469.56	-1776.19	-216.156	2880.25	0	1369.72	-235.938	615.375	6243.12	-2622.75	5790.69	1802.97
9.76124	1516.56	1478.86	1815.19	9579.56	1637.44	1379.81	-507.125	-685.906	1479.5	0	1658.72	436.438	1164.19	6011.12	-2381	4348.44	1632.09
9.76104	3729.38	1741.83	1815.19	9911.88	1431.5	1279	423.812	-1024.28	291.5	0	2157.22	1423.19	2261	5358.66	-2717.62	3436.19	1821.41
9.76084	6540.81	1981.53	2583.44	8915.38	1135.19	1167.12	476.625	-1161.03	-595.625	0	2589.31	1833.5	2473.62	4612.19	-3275.5	2891.38	2176.19
9.76064	7912	1958.14	5872.19	6829.5	1055.38	809.875	-535.438	-1177.06	-1243	804.5	2783.97	1561.38	1691.94	4061.59	-3452.62	2477.06	2540.59
9.76045	6771.44	1620.59	6297.12	5373.69	1285.75	198.188	-2082.75	-1256.81	-1629.38	1804.19	2614.88	1282.31	1275.06	3783.31	-3044.12	2482.56	2861.91
9.76025	4312.44	1102.11	6297.12	5663.62	1690.53	-370.188	-2986.25	-1551.81	-1797	1379.56	2078.72	1212.62	2053.81	3761.03	-2387.38	2759.81	2986.25
9.76005	2738.94	482.266	5573.94	6781.44	2185.06	-551.312	-2561.06	-1996.28	-1874.75	399.812	1461.41	874.312	3157.94	3976	-1837.5	2368.88	2730.81
9.75985	2838	-164.578	5053.56	7385.38	2781.94	-88	-1450.56	-2285	-1840.25	142.062	1201.78	217.938	3399.12	4305.12	-1266.38	976.5	2213
9.75965	3469.19	-569.438	5053.56	7672.94	3344.41	1080.44	-828.875	-2136.75	-1457.12	647	1463.62	-19.4375	2959.06	4505.25	-340.125	0	1841.38
9.75945	3446.56	-478.266	5099.44	8426.25	3576.19	2525.12	-1030.5	-1591.84	-631.25	1204.31	1964.91	501.688	2807	4424.69	747.25	0	1869.22
9.75925	3064.88	-67.8125	5289.38	9068.88	3356.03	3331.25	-1388.06	-971.188	233	1857.75	2325.06	1013	3025.56	4159.66	1214.5	1012.62	2135.88
9.75906	3331.25	204.297	4109	8379	2869.09	2832.56	-1141.88	-508.688	501.5	3240.94	2459.34	704.5	2817.38	3946.5	598.625	2050.19	2347.22
9.75886	4358.81	226.406	4109	6627.5	2335.47	1372.94	-106.562	-90.7812	108.25	5138.19	2530.25	-96.4375	1987.62	3985.91	-568.5	2630.94	2461.47
9.75866	5268.38	357.328	3272.12	5330.38	1852.31	17.375	1271.31	558.469	-152.25	6369.94	2650.53	-441	1361.62	4381.19	-1326.75	3472.75	2681.5
9.75846	5430.69	815.906	4053.75	5098.56	1582.84	-554.625	2140.06	1442.56	453.375	6241.12	2805.53	4.4375	1587.06	5084.09	-1345.75	4862.94	3141.41
9.75826	5088.12	1304.88	4053.75	5266.19	1779.12	-569.375	1877.62	2152.97	1477.62	5254.31	2992.69	885.5	2376.56	5837.38	-1010.12	5945.69	3687.78
9.75806	4725.69	1442.34	4467.38	5483.62	2400	-488.062	917.188	2265.5	1673.5	4262.06	3247.94	1951.62	3210.44	6331.34	-583.875	5760.31	3956.88
9.75786	4465.12	1261.91	5643.56	6101	2966.5	-225.562	538.25	1827.75	656.125	3637.31	3521.69	3157.56	4078.25	6514.78	134.375	4515	3676.16
9.75766	4337.81	1035.33	6599.31	6967.75	3074.75	580.375	1331.75	1302.22	-445.375	3379.25	3651.88	4099.62	5119.94	6605.78	1220.38	3479.31	2943.28
9.75747	4676.25	845.344	6599.31	7362.56	2881.31	1751.88	2308.19	1001.81	-407.5	3334.25	3485.84	4082.25	6035.5	6707.78	2244.5	3641.06	2174.75
9.75727	5773.88	616.031	4817.94	7250	2819.94	2604.19	2198.56	755.219	562.375	3167.25	2981.47	2905.5	6322.88	6610.03	2834.25	4574.31	1701
9.75707	7286	386.141	3562.19	7212.31	3010.16	2904.12	1256.38	233.594	1318.5	2724.69	2236.38	1182.19	5920.31	6129.66	3217.62	4809.62	1450.75
9.75687	8326.38	261.109	3562.19	7041.5	3265.31	3251.75	891.25	-563.125	1355.88	2496.81	1497.25	-176.688	5363.56	5462.53	3814.25	3513.62	1120.41
9.75667	8208.94	208.438	3406.56	5914.44	3548.47	4155.56	1674.56	-1336.66	1118.38	3086.81	1063.97	-505	5366.5	4963.22	4570	1563.12	586.156
9.75647	6966.06	167.406	3893.38	4176.12	4010.81	5159.38	2675.25	-1880.78	964.25	4185.12	1045.41	400.562	6203.5	4715.31	5107	452.75	17.4688
9.75627	5212.88	275.625	4172.81	3356.44	4561.53	5429.06	2898.25	-2179.44	726.625	4805	1237.16	2053.69	7314.38	4600.09	5284.25	326.125	-356.312
9.75608	3675.62	714.719	4172.81	3926.62	4783.69	4924.38	2478.81	-2149.09	380	4660.5	1356.38	3280.06	7704.5	4685.38	5133.5	0	-423.844
9.75588	2774.94	1364.95	5063.81	4545.25	4430.03	4319.88	2074.31	-1590.25	340.5	4506.56	1358.34	3052.44	7102.62	5170.91	4467.12	0	-173.312
9.75568	2404.56	1862.39	4551.88	4199.38	3749.66	3888.88	1809.38	-517.312	771.5	4858.94	1391.19	1558.88	6473.19	5906.5	3159.25	0	313.406
9.75548	2098.06	2012.08	3866	3675.69	3171.72	3263.44	1408.75	660.375	1149.62	5197.62	1504.03	83.625	6794.44	6338.69	1770.38	0	833.812
9.75528	1625.56	1943.5	3866	4022.25	2863.06	2404.56	951.875	1451.69	898.25	4905.69	1604.16	-309.938	7567.81	6137.38	1243.12	0	1190.41
9.75508	1408.5	1839.3	4455.25	4796.31	2744.25	1968.94	903.938	1706.78	128.875	4288.31	1701.22	343.688	7420.56	5638.47	1799.5	0	1364.34
9.75488	1998.12	1694.94	5265.12	4934.56	2755.53	2318.69	1492.19	1660.84	-498.625	4023.56	1971.66	1361.06	6160.38	5440.44	2634.5	0	1442.16
9.75469	3053	1398.83	5265.12	4454.62	2892.84	2855.12	2377.44	1648.19	-446.125	4094.44	2497.69	2201.62	5161.75	5726.09	2903.75	0	1426.19
9.75449	3321.44	920.484	7199.69	4190.5	3071.19	2839.25	2890.19	1832.16	255.75	3948.81	3100.62	2629.88	5422.12	6206.5	2578.12	0	1319.59
9.75429	2051.94	378.734	7208.69	4448.25	3159.75	2310.75	2488.56	2113.72	976	3479.44	3519.19	2632.38	6328.75	6600.31	2101	0	1362.81
9.75409	104.688	8.39062	5632.69	4909.56	3157.38	1677.25	1208.5	2228.38	926.375	3227.75	3637.34	2539.94	6919.5	6880.22	1643.5	0	1890.56
9.75389	-905.188	45.8125	5632.69	5452.75	3207.88	956.25	-192.625	2006.75	-18.75	3600.19	3494.38	2802.5	7258.75	7066.06	1062.75	193.938	2863.56
9.75369	-434.25	532.312	2087.25	6222.69	3421.72	55.875	-806.438	1587.72	-1017.75	4246.81	3217.06	3229.19	7636.88	7056.28	367.5	645.5	3780.06
9.75349	644.062	1224.94	2062.38	7123.25	3756.5	-695.75	-487.875	1296.16	-1206	4310.12	2992.47	2884.31	7404.06	6781.34	-65.375	115.062	4183.31
9.75329	1492.88	1796.88	2062.38	7865.75	4077.97	-1035	42.875	1285.53	-824.5	3253.31	2938.84	1309.06	5973.06	6372.19	334.375	0	4073.25
9.7531	2311.56	2115	1956.19	8334.69	4277.66	-1358.88	193.75	1409.53	-804.625	1521.25	2929.06	-502.25	4401.94	6045.34	1923.75	0	3714.09
9.7529	3549.06	2230.02	1410.94	8544.5	4324	-2035.88	258.125	1466.62	-1341.25	270.188	2719.66	-1114.81	4402.75	5869.25	4294.88	1040.88	3265.78
9.7527	4844	2149.23	1041.5	8528.06	4253.41	-2451.25	832.688	1421.59	-1714	138	2335.12	-529.188	5838.31	5722.09	6141.38	2999	2792.12
9.7525	5426.94	1797.44	1041.5	8503.62	4148.81	-1636.31	1747.56	1317.16	-1628.12	423.062	2106.75	-186.25	6714.56	5466.59	6208.75	3504.25	2446.81
9.7523	5201.62	1235.62	187.938	8722.62	4116.91	306.562	2096.19	1124.25	-1770.25	5.375	2200.06	-924.312	5982.44	5129.03	4608.75	2674.81	2393.56
9.7521	4737	758.469	0	8975.19	4242.78	2243.69	1324.31	805.594	-2609.88	0	2354.19	-1812.56	4960.5	4886.31	2770.62	1805.5	2597.81
9.7519	4357.38	663.453	302.312	8812.81	4507.84	3348.44	-142.875	424.562	-3516.12	0	2312.97	-1566.44	5296.56	4843.56	1889.12	1477.62	2871.56
9.75171	3851.62	972.734	1130.12	8417.12	4733.91	3573.56	-1468.31	65.875	-3684	0	2284.03	-418.688	6655.06	4830.59	1866.5	1412.06	3081.88
9.75151	3008.5	1444.69	1933.75	8492.94	4684.31	2983.25	-2236.56	-285.031	-3215.88	1622.19	2638	299.688	7417.12	4533.91	1975.75	1733.25	3188.78
9.75131	1886.06	1828.05	2305.31	9044	4307.88	1693.56	-2516.5	-689.219	-2595.38	2662.75	3299.19	118.938	6937.44	3908.19	1922	2992.06	3157.84
9.75111	635.688	2060.08	2305.31	9132.5	3843.72	519.438	-2388.44	-1137.75	-1743.12	2937.12	3819.16	-45.5	6036.75	3330.41	1821.88	4867.56	2985.31
9.75091	-375.125	2231.91	1339.19	8290.94	3574.12	514.5	-1771.31	-1554.44	-430.125	3057.38	4011.16	565.438	5611.56	3176.62	1694.75	6052.62	2749.78
9.75071	-402.5	2405.16	992.375	7298.44	3480.66	1487.44	-675.75	-1844.5	872.625	3246.31	4108.28	1407.81	5747.75	3342.75	1564.5	5820.44	2496.38
9.75051	929.938	2501.83	1613.81	7000	3266.56	1970.81	651.188	-1902.19	1478.5	3443.38	4238.56	1514.75	6134.38	3437.47	1682	4805.56	2128.28
9.75032	2670.25	2390.31	2704.88	7223.12	2737.66	1166.81	1899	-1699.16	1528.75	3890.81	4150.69	884	6483.75	3416.62	2110.5	3815.19	1552.47
9.75012	3201.5	2039.81	3084.19	7526.88	2020.88	45.9375	2843.56	-1434.59	1713.88	4655.12	3652.09	308.812	6395.06	3683.84	2442.25	2720.38	876.656
9.74992	2217.88	1532.64	2464.69	8137.5	1356.84	-85.5	3304.88	-1434.5	2160.38	4963.38	3001.06	149.562	5480	4441.56	2432	1175.75	319
9.74972	1259.38	964.219	2464.69	9259.12	840.375	690.188	3183.5	-1751.38	2403	4057	2596.12	-32.125	3932.75	5277.28	2518.25	0	-16.5312
9.74952	1758.69	444.438	1941.25	10216.4	490.188	1357.5	2661	-1981.56	2298.75	2547.19	2473.78	-654.375	2594.81	5683.56	3159.25	0	-123.844
9.74932	3261.06	181.5	2241.94	10307.4	424.062	1519.06	2175.5	-1654.62	2153.62	1894.75	2362.78	-1508.25	2217	5758	4056.88	441	60.1562
9.74912	4303.25	380.734	1941.75	9976.19	738.781	1625.69	2000.06	-744.281	2037.25	2506.44	2093.53	-2086.75	2867.12	5995.84	4649.38	1476.75	571.938
9.74892	4467.75	972.281	1324.38	10123.7	1254.75	1982.44	1948.38	345.688	1760	3300.88	1711.34	-2112.31	4108.38	6472.28	4941.62	1808.44	1199.03
9.74873	4573.69	1583.09	1156.25	10663.2	1617.56	2320.31	1661.69	1225.94	1464.25	3319.12	1293.53	-1598.25	5431.94	6662.69	5149.75	1765.94	1575.69
9.74853	5070.75	1901.67	1297.62	10768.4	1723.84	2290	1063.75	1791.22	1461	2835.38	914.812	-691.812	6399.81	6186.28	5011.5	2011.94	1554.56
9.74833	5346.81	1963.31	1297.62	10244.8	1868.41	1839.94	333.812	2119.09	1551.62	2541.69	757.25	396.938	6724.25	5370.66	4339	2423.94	1303.53
9.74813	4850.88	1965.61	434.25	9637.38	2351.41	1154.81	-430.875	2309.12	1312.25	2487.56	1010.69	1475.75	6493.44	4847.59	3804.5	2345.94	994.906
9.74793	4019.31	1941.36	697.875	9169.19	3060.31	598.375	-1247.25	2441.22	969.25	2353.81	1630.28	2406.25	6153.38	4811.59	4067.62	1729.94	624.094
9.74773	3569.06	1793.62	2063.19	8584.25	3576.62	588.875	-2024	2545.03	1078.12	2125.38	2356.19	2930.44	6035.62	4944.56	4384.5	1343.56	246.375
9.74753	3437.88	1555.31	3165.75	8002.25	3619.53	1181.69	-2597.12	2576.31	1357.62	1924.62	2987.28	2671.25	5999.38	4952.09	3385.38	1692.31	159.438
9.74734	3045.81	1389.72	2727.44	7981.31	3251.84	1883.69	-2931.31	2504.5	918.375	1660.12	3495.97	1685.5	5721.56	4887.97	1238.75	2349.12	605.688
9.74714	2359.75	1344.34	1475.62	8615.19	2725.56	2146.31	-3035.69	2395.72	-169.25	1380.12	3880.03	836.062	5229.62	4946.94	-292.75	2781.81	1384.53
9.74694	2078.94	1287.36	1397.31	9344.62	2318.84	1906	-2828.88	2306.28	-642.375	1545.62	4077.53	1016.38	4910.25	5169.44	-231.625	3311.31	1992.69
9.74674	2666.25	1106.53	3164.06	9763.69	2308.5	1469.88	-2434.06	2149.47	192.25	2376.88	4076.97	1981.19	5025.44	5435.62	462.875	4475.94	2143.94
9.74654	3594.19	829.266	5183.56	9935.44	2846.09	1119.44	-2379.62	1819.91	1429.5	3295.12	3974.34	2570.75	5482.12	5612.12	602.25	5722.5	1960.84
9.74634	3835.44	529.297	5566.12	9837.44	3716.34	999.812	-2944.75	1420.56	1835.62	3639.44	3861.38	2231	6137.12	5617.06	380.625	5775.19	1652.62
9.74614	3013.88	241.344	4383	9181.5	4380.44	1062.75	-3477.19	1190.28	1325.88	3637.12	3756.81	1633.5	7052	5425.53	523.25	4490.31	1243.03
9.74595	1833.94	-8.85938	3311.5	7938.31	4462.5	904.062	-3120.12	1188	663	3935.44	3679.34	1527	8214.06	5114.69	906.625	3315.19	741.75
9.74575	1295.5	-183.641	3370.44	6497.44	4139.41	45.875	-2170.56	1205.72	476.5	4366.88	3673.56	1711.44	9162.94	4892.19	1029.25	3346.25	397.438
9.74555	1647.75	-252.812	3909.25	5220	3879.19	-1346.12	-1763.5	1030.84	1110.5	4096.44	3713.22	1641.62	9216.31	5009.31	1077	3838.19	542.062
9.74535	2307.38	-179.375	3993.88	4319.81	3842.53	-2421.88	-2048.69	656.156	2602.38	3107	3687.34	1373.44	8125.31	5584.97	1459.5	3507.19	1207.59
9.74515	2667.88	57.0625	3906.06	4139.62	3764.97	-2603.06	-1843.81	207	4168.62	2580.38	3545.53	1238.62	6350.25	6470.25	1824.38	2597.69	2073.19
9.74495	2633.31	340.078	4580.06	4923.69	3457.97	-2144.12	-635.688	-177.562	4492.62	3273.5	3369.56	1145.19	4709.38	7291.12	1590.75	2468.12	2811.75
9.74475	2342.06	426.656	6045.81	6284.88	3174.84	-1452.5	299.438	-340.562	3243.12	4270.12	3249.91	997.812	3923.75	7713.12	1117.88	3430.25	3339.88
9.74455	1862.5	235.359	7305.5	7497.31	3308.47	-443.125	-194.188	-168.375	1598.88	4188.25	3198.75	1342.06	4347.5	7745.81	1305.12	4263.06	3707.53
9.74436	1441.44	34.8594	7667.19	8327.44	3864.06	929.438	-1126.06	217.656	610	3210.69	3258.72	2633.31	5667.38	7754.12	2165.12	4005.69	3931.81
9.74416	1609	134.891	7402.06	8938.19	4423.44	2060.44	-663.312	467.312	-102.25	2887.94	3563.38	4151.06	6810.44	8088.31	2725.88	3161.5	4043.09
9.74396	2525.5	436.141	6945.12	9052.69	4579.72	2320.25	1129.38	364.531	-1203.12	3910	4126.75	4721.88	6750.5	8722	2354.38	2760.62	4131.44
9.74376	3482.62	523.344	6199.19	8127.62	4249.31	1943.5	2418.62	124.594	-2196.5	5105.25	4634.72	4464.88	5774.56	9328.16	1351.5	3058.81	4183.25
9.74356	3631.06	206.625	5014.44	6537.25	3595.09	1634.38	2249.56	182.844	-2293.88	5112.56	4649.44	4687.75	5443.5	9659.62	217.625	3591	3988.88
9.74336	3093.19	-268.781	5014.44	5567.62	2828.81	1593.06	1441.19	703.062	-1915.75	4234.44	4085.12	5827.44	6731.94	9699.84	-811.5	3864.25	3409.34
9.74316	2754.88	-584.594	3129.19	5706	2121.75	1584.44	702.75	1413.31	-1914	3868.5	3356.62	6592.69	8592.69	9442.38	-1315.5	3592	2671.5
9.74297	2964.56	-678.516	3010.31	5820.69	1558.72	1635.69	-473.625	1924.12	-1866.5	4600.25	2976.31	5702.5	9099.12	8754.56	-644.125	2783.44	2187.56
9.74277	3112.75	-640.875	2951.06	4823.25	1100.31	1896.19	-2369.62	2094.16	-715.375	5763.94	3087.84	3644.25	7813.56	7637.47	1143.75	1946.69	2100.91
9.74257	2688.38	-529.047	2587.06	3442	671.625	2060.75	-3854.81	2058.56	1178.38	6683.94	3473.38	2050	6197.06	6498.28	2825.5	1711	2211.81
9.74237	2099.69	-414.078	1949.19	3292.38	322.188	1773.94	-3664.38	2006.88	2233.25	7379.38	3904.22	1895.69	5658.69	5907.06	3099.75	1985.12	2338.03
9.74217	2019.31	-411.297	1309.44	4541.06	195.812	1443.25	-2043.06	2004.22	1917.25	7922.81	4287.84	2878.44	6055.62	6030.31	1973.62	2036.69	2504.34
9.74197	2354.44	-512.188	1049.25	5677.56	298.25	1753.69	-242.812	1970.84	1318.88	8015.94	4481.41	4049.25	6350.38	6471.56	665.25	1625.62	2734.84
9.74177	2370.81	-543.25	1479.12	5728.75	413.625	2450.62	983.688	1760.16	1295	7595.88	4220.03	4473.44	5941.75	6761.25	220	1356.25	2929.91
9.74158	1648.62	-429.219	2461.19	5615.44	346.562	2586.12	1610.31	1293.59	1508.5	7124.38	3432.94	3725.69	4909.38	6879.06	583.125	1575.12	3067.81
9.74138	539.438	-334.75	3339.25	6750.06	152.906	2054.38	1675.25	713.781	1583.38	6776.25	2523.34	2370.62	3613.38	7159	1073.75	1760.94	3280.12
9.74118	-213.688	-385.984	3524.56	9022.88	7.65625	1847.81	1289.56	407.688	1742.62	5989.56	2086.31	1639.62	2612.81	7765.03	1406.38	1606.38	3547.59
9.74098	-80.6875	-408.578	3060.12	10973.8	0	2498.31	949.062	762.562	1820	4466.44	2308.12	2091.19	2491.5	8454.88	1901.88	1892.19	3550.28
9.74078	852.375	-145.656	2406.25	11647.4	0	3284.31	1038.56	1797.12	1042	3081.5	2816.81	2921	3216.5	8890.56	2733.62	3362	3071.72
9.74058	1868.25	372.938	1872.81	11494.2	0	3500.12	1223.94	3051.59	-544.375	2949.69	3179.09	3108.19	4022.06	9016.66	3397.38	5249.12	2390.28
9.74038	2223.75	885.609	1554.38	11421.8	0	3570.75	936.812	3916.69	-1683.12	3867.69	3357.31	2790.88	4371.62	9022.38	3285.88	5949.69	1977.31
9.74018	1979.19	1246.11	1637.44	11640.1	0	4124.12	204.938	4091.06	-1645.75	4543.12	3559.31	2783.38	4616.06	9032.09	2616.88	4960.75	1890.28
9.73999	1954.62	1503.55	2327	11747.4	0	4665.12	-554.312	3709.53	-1159.12	4310.62	3815.78	3104.62	5236.38	8994.56	2288.5	3261.75	1762.03
9.73979	2637.06	1684.41	3419.19	11511.6	0	4115.44	-1235.12	3090.25	-868.125	3780.5	3922	2914.88	5923.94	8877.22	2703.88	1905.44	1372.53
9.73959	3497.44	1726.06	4249.69	11146.2	0	2315.75	-1898.19	2452.75	-169.375	3664.75	3735.88	1836.81	6039.31	8823.44	3186	1137.44	933.375
9.73939	3747.56	1643.86	4222.12	10948.9	172.062	137.125	-2226.06	1858.09	1435	3787.44	3347.75	462.938	5588.75	9028.66	2838.5	911.062	746.688
9.73919	3389.88	1554.22	3331	10935.6	735.219	-1684.44	-1851.88	1293.75	3021.12	3652.5	2977.84	-545.188	5063.88	9498.34	1675.62	1308.12	835.344
9.73899	3002.62	1466.56	2176.19	10809.6	1441.75	-2990.38	-1082.62	761.656	3514.62	3360.75	2860.16	-1075.5	4649.69	9981.97	573.75	2099.94	1016
9.73879	2805	1228.52	1505.38	10241.6	1977.06	-3565.75	-599.812	347.688	3344	3397.19	3192.25	-1107.62	4313.69	10134.2	320.125	2579.06	1134.06
9.7386	2601.69	787.234	1646.38	9326.94	2042.03	-2979.5	-499.812	219.844	3565.88	3819.12	4000.31	-412.438	4345.38	9733	1029.75	2271.81	1107.78
9.7384	2465	388.438	2297	8726.88	1596.88	-1338.88	-258.375	475.375	4138.12	4170.94	5020	933.812	4925.31	8806.91	2312.12	1466.31	919.531
9.7382	2686.44	381.594	2938.31	8956.06	885.062	435.688	365.562	982.156	4360.88	4120.81	5863.44	2344.5	5356.56	7626.31	3629	790.688	718.812
9.738	3017.75	852.641	3428.75	9453.38	273.281	1473.94	965.875	1486.97	4345.12	3845.44	6347.34	3433	4726.81	6556.72	4533.5	595.812	807.906
9.7378	2770.44	1518.62	3979.94	8958.94	38.5	1725.62	1037	1904.69	4656.62	3799.62	6557.41	4438.81	3369.25	5845.66	4880	909.188	1357.78
9.7376	1955.94	1968.16	4562.38	7182.88	211.438	1623.12	384.75	2346.94	5041.88	4294.94	6632.94	5554.62	2673.25	5509.84	4868.62	1623.44	2189.09
9.7374	1637.5	1974.62	4736.44	5500.38	581.938	1411.88	-954.125	2795.22	4900.25	5242.56	6676.34	6301.06	3195.12	5424.97	4775	2513.94	2948.81
9.73721	2673.5	1620.22	4264.81	5356.75	901.219	1195	-2625.88	2933.97	4561.25	6151.75	6846.5	6056.19	3858.62	5497.69	4697.75	3344.31	3440.25
9.73701	4563.5	1182.78	3533.56	6479.5	1091.78	1274	-3798.44	2485.97	4630.5	6447.44	7255.75	4882.88	3458.69	5702.84	4640	4102.88	3665.03
9.73681	6005.56	906.656	3071	7504.69	1204.09	1854.44	-3732.88	1611.66	4460.38	5938.12	7686.25	3392.25	2221.62	5972.41	4602.88	4871.94	3613.12
9.73661	6263.44	850.031	2936.94	7972.5	1189.91	2492.69	-2686.44	791.188	2923.75	4980.81	7681.25	2079.19	1363.62	6150.69	4435.62	5382.75	3192.5
9.73641	5549.75	925.188	2893.19	8613.62	883.094	2408.19	-1715.06	358.625	595.75	4174.06	7094.12	1227	1650.06	6138	3876.5	5054.5	2394.44
9.73621	4388.88	1047.59	2876.31	9780.88	300.125	1519.56	-1367.56	301.812	-521.125	3958.19	6328.47	1134	2880.75	6037.66	3043.5	3677.75	1402.78
9.73601	3178.62	1197.73	2917.38	10817.2	0	735.875	-1061.06	445.031	357.5	4455.94	5836.19	1816.19	4374.75	6057.88	2598.5	1808	473.719
9.73581	2273.94	1342.84	2856.31	11198.5	0	920.125	-54.25	612.812	1942.62	5450.94	5585.66	2634.25	5513.06	6237.81	2968.75	301.5	-225
9.73562	1942.81	1374.28	2588.81	11152.4	213.312	1867.06	1346.19	625.375	2896.38	6428.5	5277.53	2848.56	6104.12	6346.94	3597	0	-613.188
9.73542	2081.56	1181.58	2411.69	10771	664.781	2661.62	1984.94	361.219	3172.88	6865.25	4895.34	2566.06	6527.94	6134.34	3523.88	0	-631.688
9.73522	2252.56	765.938	2677.88	9695.38	910.312	2813.19	1192.12	-92.9375	2977	6693.25	4690.06	2570.44	7234.44	5648.81	2689.12	604.5	-307.219
9.73502	2132.62	230.359	3282.12	8296.38	1084.44	2566.38	-357.688	-492.656	2052	6385.12	4704.81	3140.44	7962.75	5223.38	2037.75	1513.38	131.688
9.73482	1801.88	-331.547	3952.12	7980.88	1350.59	2222.12	-1247.94	-697.344	779.5	6393.5	4698.03	3649.19	7939.31	5128.03	2185	2048.56	370.688
9.73462	1560.5	-878.016	4825.75	9340.19	1594.47	1776.5	-808.562	-767.094	518.75	6531.56	4575.78	3578.56	7027.69	5318.56	2617.62	1896.81	365.094
9.73442	1546.94	-1348.47	6078.94	10949.9	1618.88	1367.94	91.5625	-767.281	1763	6085.25	4548.66	3338.31	6031.94	5574.34	2647.38	1269.06	491.594
9.73423	1545.25	-1630.73	7060.75	11179.6	1464.19	1470.69	-0.8125	-621.562	3055.25	4648.5	4726.03	3594.81	5499.06	5801	2619.25	880.938	1157.84
9.73403	1195.31	-1658.94	6624.38	10431.5	1339.66	2240.06	-1349.5	-237.562	2858.75	2803.75	4835.72	4200.44	4901.25	6082.09	3437.38	1513.44	2250.78
9.73383	503.312	-1500.61	4619.31	10249.2	1356.38	3088.69	-2641.62	327.188	1683.25	1784.62	4547.53	4426	3593.38	6459.56	5071.88	3388.19	3170.91
9.73363	43.5625	-1284.62	2434.88	10750.6	1531.88	3385.69	-2614.38	898.562	1269.62	2260.94	3910.12	4088.38	2002	6814.06	6345.88	5790.56	3497.94
9.73343	321.812	-1084.5	1590.81	10537	1962.16	3263.19	-1552.62	1308.16	2288	3506.19	3297.91	3779.19	1094.25	7035.91	6396.75	7405.56	3428.16
9.73323	931.125	-957.281	2146.06	9057.31	2727.12	3193.56	-672.875	1455.31	3855.5	4078.38	3039.28	3911.06	1015.62	7205.75	5657.75	7311.88	3389.53
9.73303	847.5	-1047.59	2934.44	7486.19	3635.31	3030.5	-524.75	1364.5	4850.75	3419.94	3217.97	4181.88	1056.38	7461.44	4997	5789.69	3416.19
9.73284	-206.125	-1490.59	3120	6918.81	4309.72	2187.81	-774.188	1229.34	4733	2414.31	3705.81	4276.94	859.875	7713.16	4541.62	4124	3202
9.73264	-1214.75	-2172.33	3014.69	7056.12	4591.06	772.312	-1202.38	1261.22	3406	2117.38	4235.47	4524.44	934.875	7658.12	4069.62	3564.69	2706.78
9.73244	-1134.25	-2732.44	3371.56	7281.19	4668.09	-178.062	-1875.56	1408.81	1198.25	2396.06	4531.5	5275.69	1852.12	7154.97	4063.25	4365.5	2352.88
9.73224	-241.5	-2891.91	4307.5	7879	4751.88	139	-2372.88	1365.59	-1105	2383.69	4524.59	5967.75	3400.88	6467.81	5257.88	5631	2509.22
9.73204	395.812	-2674.81	5192.44	9285.5	4823.56	1389.56	-1971.38	978.875	-2768.38	1969.06	4400.72	5559.06	4703.5	6008.78	7151.25	6099.12	3038.09
9.73184	449.938	-2246.27	5471.44	10893	4802.34	2655.38	-910	523.625	-3478.88	2018.5	4351.03	3956.5	5014.75	5893.66	8133.88	5338.19	3524.22
9.73164	503.188	-1698.73	5285.81	11595.3	4755.5	3438	-471.312	387.188	-2999.75	3055.5	4337.88	2339.56	4468.38	5902.06	7563.38	4218.88	3780.91
9.73144	780.062	-1133.56	5121.19	11216.4	4772.84	3755.06	-1292.75	554.25	-1147.38	4470	4189.97	1741.56	4075.19	5860.47	6694.88	3888.25	3950.31
9.73125	660.438	-769.75	5063.19	10626.2	4787.66	3652.5	-2439.62	623.031	1387.88	5326.56	3848.41	1809.56	4644.56	5859.91	6823.38	4287.25	4216.66
9.73105	-175.625	-707.422	4809.38	10541.4	4723.53	3166.94	-2773.31	346.812	3033.62	5366.19	3428.31	1466.62	5630.56	6009.84	7405.5	4255.12	4595.62
9.73085	-804.562	-655.906	4393	10788	4716.28	2587.81	-2452.38	-47.375	3016.75	4887.38	3117.22	505.188	5665.81	6174.25	7061	3266.62	4948.88
9.73065	143	-186.5	4306.5	10739.8	4964.38	2193.5	-2266.06	-172.844	2400.62	4204.31	3087	-111.25	4546.94	6159.41	5732.5	2286.12	5064.88
9.73045	2953.69	714.703	4607.75	10081.3	5393.03	1704.81	-2124.75	41.5625	2511.5	3656.5	3393.28	442.312	3869	6059.81	4514.88	2366.81	4771.44
9.73025	6423.56	1591.19	4495.88	9105.88	5686.28	518.625	-1260.38	351.281	2985.25	3649.56	3857.06	1789	4962	6165.78	3696	3130.44	4104.59
9.73005	8815.75	2069.89	3406.5	8479.31	5671.72	-1292.5	353.375	596.531	2549.25	4115.44	4170.53	2844.06	6897.38	6531.75	2504.25	3472.56	3354.22
9.72986	9076.69	2233.64	2114.81	8666.19	5488.97	-2616.06	1797.19	906.531	1254.12	4283.81	4260.03	3019.12	7581.75	6881.22	906.5	3228.75	2855.53
9.72966	7442.69	2343.28	1907.69	9432.12	5345.5	-2373.56	2431.62	1445.22	517.625	3577.75	4426.72	2591.62	6406.81	6998	131.125	3123.06	2749.75
9.72946	5189.75	2427.67	2788	9995.62	5293.5	-874.875	2502.75	2086.84	1040.88	2514.75	4950.88	2065.31	4699.62	6965.38	804.375	3393.81	2981.47
9.72926	3641.81	2336.81	3381.94	9796.44	5322.5	316.312	2426.06	2475.41	1999	2149.38	5650.72	1610	3799.12	6889.31	1762.12	3575.12	3431.34
9.72906	3165.56	2043.69	2720.12	9000.5	5489.06	15.5625	2203.81	2383.28	2432.62	2764.12	6038.56	1251.81	3903.69	6624.12	1515.5	3523.69	3954.12
9.72886	3151	1674.95	1299.94	8185.69	5812.91	-1362.25	1762.38	1912.94	2252.88	3652	5857.62	1279.69	4754.62	6012.25	27.5	3570.81	4379.19
9.72866	2961.75	1297.97	191.938	7745.38	6147.75	-2448.94	1267.19	1348.16	1614.5	4101.44	5267.22	2066.25	6108.31	5253.62	-1692.88	3657.31	4613.75
9.72847	2620.62	852.969	0	7726.31	6284.03	-2544.94	863.938	918.812	435.5	4054.31	4561.22	3423.56	7242.12	4770.78	-2938.75	3397.88	4705.28
9.72827	2497.38	300.969	456.812	8004.94	6116	-2179.44	581.125	747.812	-1018.12	3808.25	3954.97	4438.81	7231.62	4750.97	-3422.25	3028.25	4706.47
9.72807	2734.88	-256.234	1653.19	8381.81	5625.56	-2127.25	625.25	893.125	-2018.25	3590.06	3629.72	4263.12	6244.75	5044.56	-2823	3094.81	4554.62
9.72787	3252.81	-606.797	2853.75	8623.31	4809.62	-2431.31	1200.25	1287.5	-2311.38	3492.44	3680	3033.81	5537.88	5473.34	-1264.75	3093.31	4210.81
9.72767	3941.06	-563.203	3135.94	8613.94	3763.91	-2631.12	1822.5	1655.72	-2326.75	3434.25	3904.5	1737.44	5648.44	5989.25	208.375	1829.81	3834.09
9.72747	4449.94	-140.562	2431.5	8431.69	2763.53	-2469	1490.62	1642.72	-2051	3181.19	3886.22	1093.56	5635.12	6515.66	631.25	0	3649.31
9.72727	4100.12	370.25	1882.12	8212.75	2092.16	-1930.19	25.375	1115.59	-712.375	2754.69	3456.69	874.062	4764.12	6890.88	355.5	0	3682.69
9.72707	2622.81	624.875	2349.88	8055	1805.25	-952.875	-1284.94	321.188	1682.12	2660.38	2962.09	514.375	3866.19	7064.62	431.25	0	3777.12
9.72688	987.562	581.812	3123.62	8105.62	1776.38	291.938	-1045.69	-291.812	3394.25	3175.25	2945.03	81.9375	4050.44	7161.78	979.5	981.25	3810.5
9.72668	874.875	516.5	2954.56	8547.5	1912.22	1002.94	480.875	-427.25	2653.25	3583.5	3642.44	199.5	4935.5	7256.88	1084.88	1977.56	3727.31
9.72648	2938.69	615.422	1932.25	9348.94	2145.41	350.812	1623.5	-163.5	-41.75	2921.62	4842.44	1080.56	5326.44	7259.41	240.75	2398.94	3436.56
9.72628	5818.69	719.547	1321.94	10161.6	2258.5	-1365.5	1265.81	134.062	-2312.12	1524.38	6082.78	2110.06	5084.19	7126.84	-949	3347.62	2928.44
9.72608	7262.19	596.719	1735.12	10617.6	1972.53	-2713.62	-15.375	144.938	-2542.12	904.125	6895	2537.31	5107.38	7026.09	-1594.12	4557.94	2463.41
9.72588	6289.88	304.625	2484.94	10673.1	1309.97	-2560	-872.5	-124.5	-1356.88	1762.5	7016.72	2242.81	5726.81	7151.53	-1347.25	4886.62	2350.91
9.72568	4084.06	89.2656	2785.69	10582.1	692.188	-1175	-748	-407.812	-419.125	3042.62	6548.19	1591	6280.06	7505.09	-327.75	4450.81	2501.25
9.72549	2680.62	33.7031	2640.62	10612.6	546.812	246.562	-257.875	-535.781	-489.875	3565.31	5868.47	813.75	6272.5	7979.88	1102.5	4484.19	2496.16
9.72529	2966.88	24.4219	2371.81	10836.6	920.312	768.938	-306.188	-634.812	-997.5	3734.19	5310.38	-89.0625	5979.56	8537.5	2295.38	5188.19	2194.44
9.72509	4139.06	3.3125	2169.31	11104.3	1550.62	216.875	-1076.25	-889.719	-1031.38	4636.75	4955.09	-959.938	5780.44	9148.75	2614.38	5376.88	1943.47
9.72489	4962.31	25.8906	2413.25	11160.1	2181.88	-1031	-1818.62	-1210.47	-259.5	6032	4750	-1448.62	5679.75	9637.41	2074.75	4454.5	2024.25
9.72469	5100.81	78.6094	3588.06	10840.4	2706.69	-2293.69	-1580.81	-1304.31	1043.62	6491.88	4672.19	-1508.81	5609.12	9739.72	1401.25	3289.81	2226.28
9.72449	5016.69	50.7188	5355.38	10181.1	3143.31	-2874.19	-290	-1058.56	2470.38	5480.5	4691.66	-1608.38	5568.94	9312.84	1303.5	2736.94	2258.75
9.72429	4989.81	-76.7812	6388.38	9310.38	3606.25	-2567.12	914	-670.125	3755.12	4139.75	4731.16	-2158.75	5423.25	8434.28	1894.38	2569.81	2282.34
9.7241	4803.94	-187.469	5774.5	8354.5	4166.69	-1873.5	725.625	-357.344	4695.25	3717.75	4798.81	-2899.19	5112.81	7380.75	2785.38	2436.69	2615.44
9.7239	4357	-218.562	4182.81	7583.75	4604.47	-1433.5	-853.25	-115.281	5104.38	4142.56	5037.75	-3197.19	4953.56	6573.75	3496.5	2765.12	3091
9.7237	4041.12	-238.094	3062.38	7466.12	4476.41	-1280.81	-2389.81	158.312	5025.88	4615.25	5501.75	-2935	5076.75	6397.5	3821	3974.12	3196.84
9.7235	4242.31	-281.062	2953.38	8224.31	3663.5	-878.25	-2539.56	451.219	4818.62	4843.31	5990.72	-2668	4808.88	6891.22	4007.25	5556.81	2842.75
9.7233	4688.06	-253.141	3097.12	9351.06	2708.53	166.375	-1388.31	698.75	4746.75	5032.25	6249.72	-2728.62	3520.94	7661.97	4449.62	6651.31	2516.22
9.7231	4549.12	-81.8125	2530.25	9964.12	2302.16	1649.38	-67.375	956.094	4540.12	5148.19	6217.44	-2613.44	1969.56	8232.97	5001.75	7018.38	2550.91
9.7229	3247.75	138.375	1098.44	9795.31	2498.38	3002.94	586.5	1332.78	3666.88	4901.88	5933.12	-1727.56	1665.56	8452.72	4943.5	6954.56	2644.25
9.7227	1215.38	235.984	0	9520.81	2777.53	3749.81	550.75	1780.34	2104.38	4293.38	5344.81	-453.062	2759.62	8486.44	3985.38	6743.69	2317.81
9.72251	-174.75	144.203	0	9895.06	2871.53	3709	107.312	2108.91	580.25	3635.75	4427	213.5	3730.25	8510.03	2899.5	6654.38	1555.16
9.72231	248.938	-49.9219	0	10793.1	3114.62	2983.5	-491.75	2245.78	-94.25	3107.06	3382.56	86.3125	3569.69	8573.69	2567.75	6986.75	746.625
9.72211	2121.56	-176.281	98.3125	11390.1	3840.28	1932.62	-827.188	2340.53	182.75	2658.12	2483.5	69.875	3109.88	8702.66	2767.38	7620.5	242.688
9.72191	3658.31	-67.9531	1178.75	11157	4816.91	1109.06	-478.188	2537.06	746.125	2275.62	1779.16	703.688	3494.81	8930.66	2651.25	7888.44	204.906
9.72171	3524.25	351.672	1702.31	10410.8	5549.22	993.688	279.812	2741.97	820.25	2007.38	1203.88	1202.69	4403.56	9196.38	2186.62	7319.81	680.656
9.72151	2298.19	999.406	1941.06	9916.38	5861.62	1566.69	455.562	2741.38	237.25	1828.94	892.625	654.438	4763.12	9330.31	2180	6191.06	1520.25
9.72131	1528.25	1653.77	2255.19	10167.6	5886.78	2172.56	-488.438	2510.12	-446.375	1792.94	1064.03	-365.625	4419.94	9188.59	2854.12	5028.19	2344.56
9.72112	1675.62	2066.14	2462.69	11061.2	5704.28	2124.69	-1741.81	2259.97	-620.25	2168.44	1583.25	-365.125	3998.06	8758	3375.75	3979.38	2874.03
9.72092	1881.06	2078.88	2264.81	12070.1	5350.75	1566.62	-1948.38	2133.91	-364	3099.12	1976.94	1017.19	3644.81	8164.56	3110.62	3036.88	3222.12
9.72072	1643.5	1717.5	1955	12650.3	5049.25	1364.88	-779.625	1985.75	-218.875	4268.75	1978.25	2540.38	3072.94	7651.03	2556.12	2451.88	3642.44
9.72052	1574.25	1223.84	2122.19	12604.8	5034.16	1870.81	785.438	1597.53	-184.125	5286.62	1771.41	3130.94	2528.56	7474.44	2536.75	2450.31	4113.28
9.72032	2149.62	919.062	2774.31	12192.9	5165.12	2274.75	1712.31	1045.38	439.875	6266.38	1592.78	3174.38	2562.44	7687.97	3027.12	2814.62	4462.78
9.72012	2765.5	929.188	3314.81	11879.4	5054.44	1795.94	1882.81	652.688	1782.62	7538.25	1408.53	3520.25	2954.38	8033.41	3267.88	3157.56	4795.19
9.71992	2675.56	1102.66	3377.38	11887.9	4605.31	1075.62	1686.69	547.312	2646.12	8848.06	1180.5	3990	2975.69	8154.34	2726.5	3377.25	5404.03
9.71973	2065.19	1306.83	3163.06	11970.1	4124.16	1374.69	1241.31	467.625	1912.88	9414.81	1155	3740.06	2748.19	7917.06	1605.5	3473.38	6239.78
9.71953	1472.56	1717.14	2927.44	11671.3	3861.16	2509.81	493	138.469	335.875	8931.5	1576.22	2740.75	3215.06	7466.5	689.5	3158.69	6835.97
9.71933	809.062	2607.08	2702.12	10855.2	3742.81	2872.56	-249	-315.75	-194	8008.06	2264.59	1980.88	4506	7034.88	881.875	2088.06	6875.84
9.71913	-253.375	3854.53	2679.69	9862.19	3635.62	1863.75	-517.312	-531.094	888.625	7346.25	2759.38	2157.38	5400.94	6787	2448.25	410	6517.16
9.71893	-1421.94	4875.44	3295.69	9054.19	3557.84	990.25	-432.25	-394.312	2286.5	6861.94	2800.09	2898.38	4929.5	6761.94	4452.38	0	6026.19
9.71873	-2075.38	5142.8	4567.5	8338.75	3484.84	1686.12	-673.75	-155.594	2946.12	5987.44	2450.94	3547.06	3644.88	6823.12	5391.88	0	5424.47
9.71853	-2005.19	4647.27	5749.25	7412.5	3238.44	3183	-1443.94	-63.375	3336.88	4627.31	1871.41	4131.94	2686.12	6729.72	4779.88	0	4711.78
9.71833	-1209.44	3789.62	6064	6450.25	2789.06	3804.38	-1893.94	-93.5938	3963.62	3441.19	1241.78	5046.94	2268.69	6424.34	3693	0	4125.22
9.71814	519.688	2961.78	5569.69	6192.06	2451.41	3526.12	-1073.56	-81.875	3910.25	3177.62	841.562	6023.69	1842.56	6209.84	3349.38	1059.88	3849.97
9.71794	2981.06	2314.05	4970.75	7137.06	2538.09	3669.25	697.438	47.9375	2137.75	3910.44	870	6038.25	1276.19	6482.19	3586.25	2097.5	3674.62
9.71774	5045.88	1798.38	4762.94	8867.94	2960.69	4496.38	1943.44	241.219	-527	4954.94	1133.5	4503.31	1074.88	7313.5	3325.88	2980.31	3292.75
9.71754	5742.19	1313.64	4891.56	10397.8	3376.91	4905.62	1653.12	344.938	-2108.25	5510.12	1168.25	2280.81	1562.31	8432.09	2203.38	4057	2837.56
9.71734	5525.94	868	5087.56	11057.4	3592.97	4566.31	398.25	140.844	-1922.25	5413.31	772.344	1077.75	2473.25	9517.97	937.875	4952.31	2760.44
9.71714	5511.25	659.297	5167.94	10905.7	3602.78	4535.19	-415.812	-476.688	-1068.5	5187.75	242.156	1694.94	3393.81	10312.3	145.75	4870.75	3212.44
9.71694	5800.81	900.891	5049.69	10505.1	3370.16	5169.44	-125.688	-1276	-579.625	5249	18	3143	4216.56	10550.2	-382.125	3875.38	3891.34
9.71675	5722.25	1503.48	4768.06	10556.7	2867.41	5087.25	714.375	-1811.97	-339.125	5292	267.312	3788.62	5116.56	10138	-957	3063.25	4516.94
9.71655	5435.38	2053.45	4465.94	11541.2	2296.88	3257.19	1260.44	-1886.19	-4.75	4819.56	869.344	3213.25	6262.62	9439.16	-1280.88	3107.69	5090.66
9.71635	5855.25	2224.25	4156.12	13314.1	2010.78	861.125	1323.06	-1735.16	242.625	4099.19	1596.22	2510.12	7504.44	9052.5	-1018.25	3430.81	5574.38
9.71615	6824.75	2122.06	3628.56	15042.6	2157.34	-184.812	1291.88	-1655	417.125	3986.81	2183.84	2769.81	8319.5	9162.75	-589.625	3381.81	5675.53
9.71595	6793.56	2104.55	2894.81	15817.3	2560.69	317.75	1467.06	-1619.75	1186.5	4725.06	2413.88	3856.19	8341.31	9358.56	-662.625	3400.5	5216.66
9.71575	4906.38	2330.56	2547.31	15412	2942.12	1125.81	1749.25	-1441	2863.5	5557.12	2323.41	4954	7977.38	9230.53	-1017.75	4120.81	4500.41
9.71555	2348.19	2620.52	3153.81	14381.2	3095.59	1540.44	1928.88	-1135.03	4616.88	5808.12	2245.75	5776.94	8007.19	8885.53	-690.625	4986.5	4020.84
9.71536	932.875	2709	4285.31	13531.7	2872.69	1718.62	2066.5	-884.344	5429.75	5723.81	2469.75	6619.56	8380	8667.59	643	4955.19	3910.06
9.71516	1135.19	2498.44	4747.75	13396.1	2224.62	1525.38	2436.81	-735.406	5329	5782.94	2896.81	7465.12	8065.25	8612	2131.5	4291.69	3896.81
9.71496	2101	2087.89	4041.62	13960.3	1328.53	650.75	3062.44	-617.781	4944.5	5754.5	3165.81	7747	6559.19	8471	2904.38	4397	3726.16
9.71476	2874.38	1685.92	3053.12	14619.9	506.5	-253.312	3442.69	-645.906	4354	5125.38	3072.84	7096.69	4870.69	8155.34	3126.75	5750.69	3368.19
9.71456	2978.94	1499.7	2866.56	14602	0	-92.875	2991.38	-1111.03	3295.12	4089.81	2731.69	5836.81	4237.69	7853.28	3437.88	7155.62	2853.81
9.71436	2382.56	1589.28	3370.88	13768.5	0	853.25	1789.19	-2078.47	2210.62	3307.62	2361.16	4571.56	4388.94	7726.31	3918.88	7392.94	2195.16
9.71416	1544.31	1794.17	3695	12872.8	0	1103.5	639.188	-3200.16	1973.75	2819.38	2095.41	3676.06	4114.5	7722.94	4278.88	6679.94	1548.44
9.71396	1118.25	1881.86	3678.25	12715.3	0	337.375	253.5	-4042.34	2486.12	2019.19	2037.59	3322	3301.06	7714.22	4576.75	5947.25	1219.97
9.71377	1173.62	1801.69	3965.25	13226.2	0	122.75	662	-4447.78	2574.75	800.312	2324.72	3562.75	3163.75	7627.84	4903.88	5433.06	1357.09
9.71357	1118.38	1746.84	4605.06	13735.6	592	1558	1556.94	-4479.59	1635	0	2997	4113.56	4281.88	7409.06	4672.88	4719.06	1763.41
9.71337	688.062	1955.14	4598.06	13926	1175.53	3513.94	2765.38	-4186.31	478.75	318.5	3851.03	4402.62	5579.31	7016.75	3255	3741.94	2145.56
9.71317	397.375	2473.3	3388.12	13996.8	1295.19	4279.38	4004.38	-3602.59	7	1490.5	4526.44	4204.81	5825.56	6544.81	1256.88	3069.44	2419.78
9.71297	611	3086.7	2014.88	14027.8	978.5	3908.25	4628.19	-2876.53	-103.75	2604.06	4762.53	3988.62	5235.12	6253.66	112.25	3246.25	2626.5
9.71277	857.812	3438.34	1928.31	13788.5	618.062	3643.88	4244.75	-2188.22	-538.75	3182.75	4563.94	4257.56	4818.44	6374.81	269.75	4260	2673.12
9.71257	643.25	3280.78	3101.56	13211.4	633.375	3741.56	3274.38	-1549.31	-824	3449.06	4167.22	4734.5	4827.5	6873.47	796.125	5601.12	2418.66
9.71238	327.062	2712.98	4253.06	12515.4	1019.22	3334.69	2216.31	-841.875	149.125	3800.56	3888.47	4655.19	4773	7426.19	977.125	6636.44	2019.47
9.71218	512.75	2146.66	4704.06	11794.9	1269.72	2209.62	713.75	-72.125	2233.12	4278.38	3930.75	3815.69	4622.38	7665.03	1185.88	7044.12	1939.91
9.71198	1083.88	1934.98	4917.81	10988.4	902.188	1319.19	-1671.38	550.438	3824.25	4462.62	4215.41	2862.12	4987.19	7482.41	1762	6995.44	2483.53
9.71178	1581.62	2031.38	5098.38	10289.9	63.5	1373.12	-3953.19	824.125	3798	3835.81	4388.97	2453.81	6043.62	7099.25	2209.38	6731.06	3443.69
9.71158	2102.88	2094.52	4462.62	10018.1	0	1968.56	-4304.56	721.969	2688.38	2445.19	4108.19	2570.31	7017.69	6797.16	2185.75	5991.38	4333.5
9.71138	3009.69	1905.77	2574	10021.1	0	2337.06	-2429.69	306.031	1584.12	1196.56	3387.72	2850	7035.5	6616.28	2236	4341.5	4845.94
9.71118	4015.62	1566.09	523.188	9870.06	504.625	2124.62	-114.938	-370.531	795.75	1121.06	2606.88	3214.38	6080.38	6408.69	2754.75	2194.38	4960.44
9.71099	4351.38	1289.17	0	9749.69	1615.53	1325.31	1112.62	-1147.66	226.375	2217.5	2113.28	3774.81	4879.88	6160.84	3233.38	861.438	4737.59
9.71079	3727.56	1152.44	525.875	10356.1	2699.22	304.75	1642.44	-1664.25	196.25	3396.94	1883.72	4316.44	4109	6089.28	3416.5	1076.94	4254.06
9.71059	2528	1107.98	1346.56	11609.3	3765.44	2.75	2338.81	-1594.84	909.375	3805.88	1659.72	4286.19	3895.44	6349.38	4113.38	1944.25	3710.91
9.71039	1252.44	1117.25	1387.81	12356.3	4786.22	1146.5	2777.31	-994.656	1573.12	3868.38	1351.28	3346.88	3949.25	6798.25	5662.5	2035.31	3343.94
9.71019	419.75	1196.36	946.125	11927.1	5542.22	2992.56	2221.75	-249.969	1143.5	4682.94	1158.22	1780	3984	7159.94	6611.12	1283.88	3138.44
9.70999	733.688	1411.83	642.5	11176.1	5837.84	3798.31	1332.75	348.562	-88.625	6611.88	1287.25	401.688	3959.44	7327.91	5458.25	1006.69	2842.97
9.70979	2406.44	1882.67	628.812	11180.4	5737	2916.38	1251.06	827.812	-557.375	8817.5	1690.78	151.625	3916.75	7401.16	3022	2041.38	2393.09
9.70959	4268.56	2670.31	827.375	11623.4	5500.59	1471.88	1568	1286.28	743.25	10085	2146.69	1436.62	3717.12	7515.91	1417.62	3649.38	2134.25
9.7094	4478.69	3583.69	1227.38	11503.4	5322.66	527.125	966.062	1648.09	3095	9822.19	2490.28	3505.31	3231.56	7751.34	1158.38	4575.56	2413
9.7092	2551.62	4222.7	1642.62	10899.1	5173.91	-301	-367.75	1832.62	4872.38	8346.75	2688.16	4738.88	2810.19	8115.62	1060.38	4567.81	3055.47
9.709	145.812	4364.81	1712.5	10720.7	4910.69	-1615.94	-819.812	2001	5029.88	6523.06	2758.59	4178.94	3134.31	8496.69	793	4308.81	3495.62
9.7088	-588.75	4235.62	1434.25	10934.7	4505.34	-2749.12	23.6875	2368.97	3707.25	5162.56	2704.47	2741.62	4323.38	8683.81	1465.5	4216.75	3410.56
9.7086	827.562	4235.47	1255.62	10507.7	4094.25	-2737.5	674.5	2825.66	1910.12	4565.31	2496.09	2275.75	5552.62	8563.31	3312.25	4010.19	3018.16
9.7084	2951.75	4435.62	1429.88	9330.44	3755.25	-2053.12	204.25	3010.03	771.25	4529.81	2095.25	3309	5966.38	8273.22	4694.75	3491.06	2719.78
9.7082	4052.06	4514.81	1734.25	8718.88	3341.28	-1916.75	-321	2801.72	686.875	4782.94	1566.75	4448.19	5686.62	8086.72	4308.38	3151	2669.91
9.70801	3684.69	4188.36	2015.38	9342.81	2701.81	-2234.06	220.562	2486.38	1006.12	5265.12	1182.84	4311.81	5439.88	8164.84	3012.62	3601.56	2804.22
9.70781	2730.81	3512.03	2470.75	9985.12	2050.84	-1705.81	1139.44	2334.03	845	5899.62	1277.31	3254.06	5438.69	8449.97	2462.88	4646.94	3096.81
9.70761	2172.69	2707.83	3113.25	9421.25	1888.78	-7.25	1218.62	2240.19	170	6287.06	1895.25	2540.56	5275.56	8712.91	2912.38	5388.75	3576
9.70741	2087.31	1869.81	3531.25	8465.44	2435.62	1594.88	683.812	1955.66	-307.875	5922.69	2685.97	2527.19	4828.5	8669.16	3344.62	5318.38	4147.44
9.70721	1932.31	980.984	3586.56	8740.75	3296.28	2152.81	524.25	1505.81	-176.875	4737.25	3245.06	2637.44	4546.88	8190.03	3116.12	4924.94	4603.47
9.70701	1554.62	121.484	3823.38	10101.4	3865.19	2259.25	729.812	1160.62	318.375	3243.38	3462.25	2727.94	4700.31	7497.94	2562.5	4942.56	4847.78
9.70681	1408	-499.281	4686.62	10919.2	3982.28	2754.06	660.188	1053.28	888.75	2089.62	3427.47	3252.81	4981.81	7025.97	2312.25	5263.62	4973.38
9.70662	1697.25	-724.859	5809.19	10694.1	4008.53	3360.38	547.688	1021.62	1446.62	1548.62	3152.59	4034.31	5103.38	6966.16	2604.75	5080.12	5053.56
9.70642	1897.31	-588.703	6642.94	10608	4292.38	3503.88	1109.06	827.156	1656	1433.44	2613.38	4054.06	5210.69	7079.41	3116.25	4077.5	4976.03
9.70622	1529.06	-266.516	7347.25	11211	4767.44	3619.06	1993.12	397.562	1013.75	1401.31	1993.38	2935.25	5394.31	7065.81	3214.38	2907.56	4612.94
9.70602	971.688	69.1094	8327.38	11336.6	5125.34	4526.69	2150.62	-138.781	-331.75	1281.38	1628.28	1729.88	5353.06	6966.22	2641.25	2203.81	4103.47
9.70582	954.625	358.797	9203.12	10162.4	5204.69	5928.75	1693.44	-533.906	-1444.75	1126.38	1680.38	1575.88	4989.69	7023.97	1931.25	1663.94	3797.34
9.70562	1528.12	642.062	9079.31	8805.38	5067.66	6563.12	1884.62	-541.5	-1541.62	991.75	2054.59	2191.38	4829.19	7292.53	1707.5	687.375	3866
9.70542	2119.88	918.484	7819.12	8587.19	4788.69	5784.69	3068.5	-97.5938	-549.625	771	2640.56	2404.5	5250.75	7601.91	1729.88	0	4105.81
9.70522	2432	1048.55	6350.94	8926.62	4358.78	4197.94	4041.88	570.281	1295.75	396.438	3424.25	1804.44	5672.94	7813.97	1337.25	0	4232.56
9.70503	2645.19	883.984	5650.69	8575.62	3836.19	2708.5	3955.62	1100.41	3551	176.5	4319.97	1181.44	5211.5	7886.56	642.75	0	4255
9.70483	2790.94	500.016	5971.06	8092.75	3439.78	1631.81	3519.38	1307.41	5075.38	667	5105.22	1438.19	3980.56	7775.09	336	246	4376.41
9.70463	2588.75	157.875	7023.31	9100.94	3340.66	858.812	3580.5	1292.22	4557.5	2000.88	5602.72	2574.56	3026.75	7521.31	389.25	0	4597.28
9.70443	2064	-33.1719	8217.06	11354.4	3391.06	318.125	3667.31	1250.44	2150.12	3468.12	5754.5	3777.06	2958.19	7377.31	76.875	0	4684.41
9.70423	1786.75	-261.188	8628.88	12639.6	3226.75	-5.5	2978.44	1267.75	-357	4058.5	5481.19	4273.62	3313.88	7568.88	-648.375	757.625	4597.34
9.70403	2207	-657.703	7489.25	11949.4	2709.47	-211	1975.38	1338.16	-1711.38	3526.75	4720.06	4114.88	3440.06	7960.69	-1002.88	2547.5	4671.59
9.70383	3072.19	-903.016	5084.69	10811.9	2145.84	-422.312	1779.5	1475.56	-2593.12	2746.06	3715.59	4104.81	3365.5	8235.28	-755.125	3680.62	5176.91
9.70364	3742.62	-425.25	2725.81	10631.6	1947.69	-677.562	2428.38	1695.03	-3947.12	2786.62	3003.88	4735.56	3493.5	8387.69	-489.625	3742.06	5874.28
9.70344	3875.12	949.156	1518.56	10488.9	2171.12	-859.688	2927.44	1915.84	-4986.25	3649.88	2876.94	5339.56	3934	8708.03	-234.75	3671.19	6270.41
9.70324	3597.5	2668.56	1491.56	8954.75	2552.25	-634.375	2893	2007.75	-4331.75	4169.12	3030.81	4890.69	4555.94	9200.72	731.125	3984.69	6224.16
9.70304	3123.31	3828.55	2033.5	6759.5	2929.53	354.688	2972.38	1976.72	-2488.62	3377.81	2975.06	3609.38	5343.12	9374.84	2217.62	3875.69	6038.03
9.70284	2397.44	3823.02	2640.62	5920.19	3393.69	1955.69	3457.06	2002	-1414.38	1806.88	2658.31	2847.19	6261.5	8834.59	2790.5	2713.12	5980.88
9.70264	1245.62	2696	2970.88	6892.75	3995.41	3314.62	3571.06	2184.81	-1682.25	996.812	2440.75	3064.38	7002.81	7856.88	1899	1404.12	5991.38
9.70244	-47.25	1043.08	2749.06	8276.75	4550.97	3577.5	2699.06	2330.53	-1776.5	1646.38	2548.72	2986.62	7284.88	7143.16	954.5	1202.56	5882.69
9.70225	-475.938	-376.594	2159.62	9109.94	4878.28	2779.06	1533.5	2153.62	-596.875	2753.5	2845.78	1525.81	7257.69	7108.31	1319.12	1790.81	5572.84
9.70205	906.312	-1093.86	2011.94	9904.19	5051.12	1766	1199.88	1710.25	884.125	2962.69	3134.28	-413.938	7225.88	7592.81	2515.12	1810.38	5018.72
9.70185	3739.12	-1166.33	2970.75	11283.3	5232.03	1284.88	1628.5	1411.44	1286.12	2321.25	3412.34	-1139.88	7096.88	8172.75	3504.25	1069.88	4170.44
9.70165	6271.56	-998.469	4712.88	12925.5	5351.31	1429.75	1646.25	1486.06	929	2021.75	3761.91	-462.688	6540.81	8550.53	4452.75	850.438	3158.62
9.70145	6911.81	-922.562	6239.06	14244.6	5150.97	1923.06	716.188	1629.34	1152.75	2591.81	4166.91	503.812	5661.12	8664.03	5872.12	1767.81	2340.81
9.70125	5646.12	-967.453	6966.88	15126.6	4538.38	2535.88	-141.25	1402.78	2226.75	3205.38	4513.78	1322.38	5063.12	8592.75	7094.88	2632.12	1964.53
9.70105	3690.12	-968.844	7179.88	15584.3	3745.03	3111.88	421.812	833.125	3089.88	2998.31	4650.62	2452.88	5161.44	8439.78	7159	2157.5	1890.38
9.70085	2167.31	-774.172	7376.81	15446.6	3098.75	3467.44	2263.94	318.938	2963.38	2281.06	4433.53	3634.12	5745.19	8267.41	6423.62	818.062	1816.03
9.70066	1569.31	-331.766	7465.56	14767.2	2720.38	3478.06	3666.25	26.0312	2265.38	1928.56	3869.84	3741.69	6307.19	8102.03	5816.62	10.125	1675.72
9.70046	2006.38	291.891	6805.25	13932.2	2475.91	3194.69	3145.75	-258.469	1836.75	2128.06	3240.69	2679.5	6493.31	7963	5140.75	0	1641.19
9.70026	3146.06	926.922	5059.31	13089.5	2172.88	2812.69	1077.81	-655.375	1936.38	2401	2915.81	1942.69	6177.75	7860.69	3702	0	1810.09
9.70006	4039.06	1403.23	2884.56	12032.2	1761.28	2564.81	-710.812	-982.406	2242	2546.62	2987.34	2556.38	5465.38	7814.34	2143.88	0	2107.53
9.69986	3846.38	1659.19	1516.5	10853.6	1332.88	2604	-866.438	-1156.41	2417.25	2849.62	3222.72	3605.69	4764.31	7922.25	1991.25	0	2481.38
9.69966	2882.38	1686.55	1525.69	10108.8	948.281	2905.81	273.25	-1417.94	2368.25	3422.38	3413.25	3662.25	4517.94	8330.47	3431.88	0	2994.81
9.69946	2315	1416.58	2242.31	10049.8	561.156	3309.62	1448.38	-1891.28	2079.75	3982.31	3590	2735.38	4707.25	9014.25	4918.62	309.125	3673.22
9.69927	2701.19	811.516	2710.06	10236.6	198.562	3643.62	2057.38	-2234.38	1475.62	4365.81	3813.44	1884.38	4942	9659.47	5040.5	560.125	4403.06
9.69907	3425.38	58.625	2903.81	10207.6	122.062	3672.69	2494.38	-2062.31	579.75	4729.69	3939.88	1652	5157.19	9919.22	3764.62	474	5049.81
9.69887	3768.5	-523.312	3466.06	10092.1	600.812	3011.31	3058.31	-1490.78	-241.625	5098.5	3773.09	1860.12	5734.25	9755.81	1968.12	1037.31	5576.12
9.69867	3909.62	-834.469	4460.12	10275.7	1494.44	1509.88	3241.94	-913	-425.875	5198	3354.19	2397	6671.62	9380.91	721.875	2566.75	5975.47
9.69847	4489.94	-1093.03	5192.56	10807.1	2250.09	-157.125	2458.75	-444.469	217.625	4983.12	2927.5	3192.12	7203.56	8929.34	784.125	4264.31	6171.16
9.69827	5591.56	-1528.88	5344.38	11371.4	2402.47	-834.25	962.688	-2.625	1211	4912	2647.56	3732.44	6790.31	8417.44	1792.12	5228.88	6080.91
9.69807	6551.44	-2145.2	5437.06	11620.2	1949.91	-205.625	-508.875	212.656	1913.5	5338.38	2459.12	3522.56	6046.19	7986.94	2282.62	5445.12	5777.66
9.69788	6642.88	-2838.41	5856.19	11467.4	1205.66	697.312	-1673.88	-160.188	2238.38	5899.75	2269.81	2839.19	5942.62	7894.16	1500.88	5528.06	5511.16
9.69768	5777.69	-3533.34	6196.12	11292.8	491.375	853.875	-2620.38	-998.75	2590	5900	2114.53	2262.38	6327.19	8178.41	637.75	5737.19	5505.22
9.69748	4686.44	-4079.14	6082	11711.2	77.0938	685.75	-2995.06	-1622.28	3158	5193.38	2093.78	1684.25	6083.06	8575.5	1048.25	5629.56	5714.44
9.69728	4405.19	-4234.41	5958.88	12743.4	179.531	1369.25	-2170.19	-1521.06	3616.75	4341.81	2211.12	598.562	4782.12	8842.94	1931.12	4786.38	5817.88
9.69708	5300.94	-3948.05	6402.38	13419.4	787.062	2979.25	-388.812	-847.781	3583.88	3914.75	2338.28	-785.688	3352	8958.84	1463.25	3606.12	5513.12
9.69688	6594.19	-3485.28	7149.56	12786.2	1594.59	4245.69	1067	-71.1562	3105.38	3945.31	2345.69	-1606.12	2853.94	8939.38	-218.875	3023.62	4814.09
9.69668	7155.88	-3077.36	7495.81	11158.4	2287.78	4204.81	1283.81	534.906	2584.12	4149.94	2230.75	-1565.94	3310.19	8727.41	-1151.12	3442.25	4010.31
9.69648	6736.94	-2612.52	7251.31	9737.06	2806.78	3242.56	696.625	917.031	2391.38	4427.75	2078.28	-1306	4095.94	8385.34	-572.625	4277.19	3350.59
9.69629	6016.69	-1904.8	6650.31	9167.81	3223.97	2307.06	238.125	1100.31	2576.12	4950.69	1903.44	-1380.06	4830.19	8143.78	256.875	4686.75	2852.09
9.69609	5519.75	-1101.69	5746.38	9245.06	3542.38	1888.12	111.375	1266.47	2840.88	5839.69	1612.41	-1514.19	5356.75	8097.69	521.5	4428.06	2415.69
9.69589	5085.31	-504.719	4684.19	9818.5	3784.19	2099.06	-19.6875	1724.53	2859.62	6880.56	1170.84	-1150.69	5365.5	8074.16	979.375	3772.12	2007.78
9.69569	4511.25	-59.6719	4184.88	10888.1	4082.66	2997.56	-141.812	2530.5	2689.25	7576.06	733.219	-249	4707.19	7960.06	1917.75	2947.31	1686.22
9.69549	4081.44	631.766	4777.81	11742.6	4450.59	4275.5	84	3285.59	2671.12	7503.25	496.438	735.75	3854.06	7921.34	2029.38	2113.38	1548.69
9.69529	4128.44	1748.95	5700.69	11225.2	4633.25	5134.06	713.5	3534.5	2829.38	6735.12	466.906	1393.12	3490.25	8108.44	509.75	1666.12	1686.25
9.69509	4540.12	2967.17	5601.56	9306.62	4466.09	4989	1549.12	3242.5	2770.88	5947.12	502.875	1698.69	3747.94	8389.84	-1380.25	2010	2064.66
9.6949	5012.12	3808.47	4426	7416.31	4213.91	4014.5	2469.62	2696.47	2461.5	5939.44	566.406	1969.81	4232.62	8609.62	-2165	2989.19	2421.94
9.6947	5374.94	4074.66	3605.5	6734.25	4221.31	2728.31	3167.56	2084.94	2575.5	6893.56	776.719	2492.56	4607.62	8872.38	-2194.62	3932.75	2464.12
9.6945	5388.38	3873.42	4057.31	7050.62	4359.56	1475.44	3045.38	1404.34	3489.88	8160.62	1207.56	3104.12	4737.94	9274.66	-2471.25	4295.56	2248.16
9.6943	4703.81	3405.39	4924.75	7745.81	4210.16	567.375	2156.56	674.938	4406.62	8896.88	1820.09	3369.19	4502.69	9553.84	-2696.25	3970.88	2166.72
9.6941	3476.56	2809.67	4865.81	8833.19	3730.69	335.75	1732.12	6.34375	4305.5	8813.94	2643.53	3350.19	3998	9356.66	-2088.38	3107.38	2407.69
9.6939	2618.12	2093.83	3881.94	10318.8	3310.53	616.875	2691.19	-524.469	3463	8154.88	3787.97	3754.62	3762.81	8751.03	-1179	2092.12	2652.81
9.6937	2887.56	1178.94	3129.06	11478.7	3150.38	708	4009.31	-890.469	3016.5	7125.94	5111.19	4851.5	4195.62	8136.91	-1021.25	1644.5	2557.44
9.69351	3926.44	126.359	3293.31	11707.9	3030.69	302.562	3901.94	-1061.19	3125.12	5768.81	6060.34	5701.75	4806.75	7721.06	-1173.38	2313.06	2329.41
9.69331	4662.69	-706.953	3869.06	11427.1	2803.16	-20.625	2475.5	-1085.5	2720.62	4426.81	6115.47	5228.38	4718	7407.41	-251.375	3725.44	2459.94
9.69311	4518.81	-919.547	3965.62	11329.3	2692.41	323.25	1643.94	-1152.31	1306.75	3838.12	5356.44	3780.5	4016.25	7159.19	1696.62	4829.19	2953.53
9.69291	3770.31	-483.938	3279.38	11339.9	2907.78	1130.56	2227.19	-1380.38	-123.125	4394.5	4375.72	2731.56	3923.94	7111.38	3043.38	5039.94	3243.44
9.69271	2867.12	243.453	2192.5	11119.1	3294.66	1982.81	2837.38	-1594.03	-478	5559.31	3633.94	2600.5	5251.5	7282.16	2974.38	4711.19	2962.44
9.69251	1972.81	904.281	1275.06	10944.5	3598.41	2910.19	2295.56	-1501.88	39.5	6437.31	3108.72	2550.5	7164.56	7480.25	2541	4383.38	2446.28
9.69231	1229.25	1327.86	866.562	11153.1	3793.09	3794	1479.75	-1092.19	536	6829.25	2613.12	1896.62	7988.31	7579	2863.88	4145.25	2283.69
9.69211	940.375	1393.08	1015.88	11230.9	3913.19	3876.44	1629.62	-687.531	656.375	7302.81	2220.03	1112.75	7011.69	7636.59	3497.12	3908.12	2621.19
9.69192	1219.56	1029.5	1642.06	10467.8	3814.66	2877.75	2216.19	-604.062	581.5	8163.31	2196.25	915.188	5069.12	7669.12	3284.25	3674.25	3128.22
9.69172	1765	449.25	2595.38	9185.81	3377.84	1972.81	1987.25	-882.344	474.5	8765.19	2621.38	1177.06	3462.56	7527.22	2023.88	3258.31	3469.16
9.69152	2237.69	84.2656	3518.44	8382	2785.97	2406.75	1119.88	-1324.19	591.75	8154.69	3249.03	1320.5	2753.88	7098.09	536.625	2425.5	3569.53
9.69132	2614.81	119.203	3890.44	8385.69	2368.28	3555.88	692.062	-1642.41	1351.62	6293.44	3745.81	1166.81	2691.69	6481.66	-494.75	1670.75	3497.34
9.69112	2876.19	290.609	3514	8700.31	2279.16	3785.44	681.625	-1599.22	2642.25	4354.19	3961.91	840.812	2926.69	5919.75	-1111	2076.88	3295.56
9.69092	2573.94	297.281	2879.62	8966.5	2484.84	3036.31	189.375	-1173.09	3637.5	3629.75	3968.34	366.688	3413.88	5682.56	-1644.25	3791.94	2950.69
9.69072	1231.31	201.375	2718.81	9282.38	2888.28	2932.94	-704.625	-612.875	3950.12	4191.5	3944.62	-89.1875	4108.56	5991.44	-2124.75	5394.62	2431.12
9.69053	-770.812	248.406	3214	9717.62	3283.44	4129.25	-1013.81	-197	4320	4854.38	4093.75	-58.1875	4593.06	6836.53	-2165.62	5596.81	1758
9.69033	-2220.88	483.297	3954	10200.9	3373.88	5229.12	-683.5	65.0312	5358	4627.56	4581.78	564.25	4329.19	7851.06	-1339.5	4936.62	1063.22
9.69013	-2330.44	757.297	4592.31	10711.9	3076.09	4971.88	-672.75	377.562	6285.62	3934.75	5421.41	1116.88	3299.94	8572.03	302.75	4777.38	519.156
9.68993	-1626.94	976.281	5103	11048.8	2690.44	3941.31	-1031.31	856.438	6007.75	3939.69	6374.66	1037.75	2150.56	8857.06	2116.88	5182.88	203.531
9.68973	-1179.12	1137.41	5388.44	10790.2	2565.88	3130.56	-587.25	1454.31	4969	4785.94	7066.31	735.188	1579.19	8878.94	3372.38	5086.44	130.969
9.68953	-1263.81	1231.69	5193.5	10111.4	2697.25	2198.25	901.688	2142.38	4663.75	5265.94	7294.59	921.812	1763.62	8759.66	3789.38	4316.94	397.406
9.68933	-1433.56	1302.47	4606.69	10069.9	2821.22	529.25	1807.25	2918.5	5398.25	4537.38	7200.69	1418.44	2470.38	8483.62	3475.38	3966.5	1089.16
9.68914	-1653.5	1490	4152.12	11234.3	2778.28	-981.562	746.375	3600.44	5777.5	3414.88	7035.09	1413.06	3423.31	8171.38	2605.38	4526.19	1978.38
9.68894	-2378.25	1807.31	4107.06	12562.6	2592.88	-859	-1454.94	3875.31	4660	3283.62	6779.16	740.562	4313.31	8098.09	1499.88	5046.88	2539.94
9.68874	-3341.06	1956.23	4171.75	12668.4	2325.97	676.688	-2848.5	3676.72	2611.12	4258.25	6149.5	79	4728	8319.81	799.5	4744.88	2463.53
9.68854	-3329.06	1596.92	4134.88	11713.2	2044.69	1906.19	-2621.19	3298.41	1038.75	5263.19	5038.28	-149.125	4510.62	8554.28	1033	4301.62	2027.91
9.68834	-1758.12	782.172	4383.06	10860	1825.12	1998.25	-1434.31	2994.06	663	5606.81	3808.81	-268.312	4104.56	8577.19	1955	4781.88	1795.34
9.68814	391.125	-59.375	5229.31	10302.5	1605.75	1803.44	-184.125	2682.28	1218.5	5517.44	3016.59	-496.75	4127.56	8500.12	2684.38	6116.75	2018.69
9.68794	1949.56	-564.469	6062.62	9327.06	1174.34	2110.06	722.125	2257.94	2014.25	5271.31	2895.06	-282.938	4582.69	8513	2584	7467.12	2482.06
9.68774	3036.62	-714.906	5813.94	8140.12	495.969	2425.44	1304.75	1997.38	2367.62	4871.19	3231.66	1030.12	4847.56	8588.66	1744.12	8365.69	2815.38
9.68755	4187.19	-713.953	4249.56	7930.25	0	1996.62	1929.44	2327.12	1941	4716.19	3678.91	3182.19	4528.69	8624.22	667.25	8643.12	2806.78
9.68735	4800.38	-751.5	2320.5	8832.94	0	1029.5	2939.88	3231.81	1015.88	5491.44	4019.31	5012.31	4029.5	8676.5	-119.875	7869	2515.03
9.68715	3891.69	-889.828	1169.88	9445.5	102.844	207.25	3914.19	4188.12	162.125	6941.44	4148.94	5433.38	4138.31	8855.81	-144.25	5929	2258.94
9.68695	2013.62	-1034.09	1121.19	8998.56	703.344	-344.688	3840.25	4727.53	-431.25	7662.75	4024.19	4319.06	5225.06	9130.66	767.875	3836.56	2414.91
9.68675	845	-1002.28	1642.94	8615.25	1545.56	-933.562	2540.88	4822.97	-870.375	6722.62	3740.38	2610.19	6900.88	9405.5	2058.12	2958.5	3039.22
9.68655	821.5	-730.156	1960.44	9542.25	2593.97	-1524.56	1250.81	4661.25	-833.625	4826.06	3541.09	1602.75	8318.06	9666.66	2649.5	3483.25	3753.12
9.68635	704.812	-391.094	1662.19	11292.5	3478.69	-1699.12	1086.06	4317.41	330	3332.62	3615.97	1902.94	8786.75	9920.75	1996.62	4414.69	4172.03
9.68616	-160.375	-201.953	1033.69	12576.4	3785.06	-1271	1590	3848.38	2505.12	2734.06	3926.16	2972.56	8224.81	10139.8	735.375	4972.19	4354.44
9.68596	-688.5	-138.219	875.75	13159.6	3674.53	-559.75	1630.06	3502.25	4450.12	2634.12	4294.12	3796.62	7016.44	10381.2	-22.75	5215.44	4617.62
9.68576	138.25	26.875	1690.25	13625.2	3799.66	-69.3125	1112.19	3527.62	5009.38	2555.31	4589.66	3913	5456.62	10755.8	113.625	5355.88	5014.28
9.68556	1626.44	398.906	2954.62	13897	4496.47	-66.625	744.688	3787.06	4295.75	2096.88	4728.03	3566.31	3613	11117.1	626.125	5304.5	5287.75
9.68536	2521.5	782.266	3537.06	13265.4	5402.78	-446.062	564.938	3798.28	3319.5	916.25	4562.72	3021.06	1851	11014.4	930.125	5058.06	5317.81
9.68516	2806.56	820.328	3010.44	11726.4	6018.28	-973.25	-12.875	3241.5	2816.75	0	3970.38	2226.62	995.75	10212.8	968.125	4837.44	5279.38
9.68496	3266.25	243.328	2222.75	10241.2	6339.34	-1681.5	-791.562	2283.31	2817.38	0	3089.09	1252.81	1469.31	9106.03	949.25	4648.81	5279.03
9.68477	3972.38	-954.719	2260.88	9522.75	6726.75	-2813.38	-740.375	1325.97	3026.12	0	2327.59	588.938	2584.5	8352.94	938.5	4261.81	5125.62
9.68457	4280.62	-2437.58	3117.75	9329	7336.16	-4137.56	365.625	567.25	3172.62	1250.12	2014.94	696.375	3317.56	8205.34	913.75	3745.31	4617.38
9.68437	3875.25	-3637.48	3840.44	9152.25	7886.53	-4651.56	1354.56	-66.3125	3094.38	2250.56	2093.22	1474.25	3580.94	8418.09	939.625	3476.62	3856.88
9.68417	2878.38	-4093.73	3870.94	9009.81	7922.72	-3555.56	1215.19	-632.844	2786	2485.5	2258.69	2361	4036.44	8676.28	1054.75	3529.75	3128.81
9.68397	1344.06	-3748.69	3655.81	9207.38	7213.19	-1435.44	425.625	-1000.94	2332.38	3069.19	2363.31	2811.81	4800.12	8812.38	1185.88	3611.19	2613
9.68377	-432.625	-2895.2	3800.5	9674.06	5976.66	192.125	149.5	-1003	1745.62	4529.69	2535.66	2607.12	5232	8689.88	1383.12	3643.12	2330.97
9.68357	-1459.75	-1898.42	4248.62	9938.94	4762.69	615.875	715.25	-656.281	1042.25	6136.12	2889.62	1958.94	5126.69	8220.88	1874.75	3732.31	2219.09
9.68337	-872	-1032.39	4745.75	9721.06	3996.59	572.5	1502.44	-146.906	461.875	7037.31	3284.59	1423.94	5197.06	7549.91	2591	3501.75	2130.69
9.68318	946.938	-457.391	5584.25	9228.88	3602	976.062	1938.75	375.688	267.25	7096.75	3505.81	1414.75	5988.75	6975.03	2904.62	2334.5	1917.69
9.68298	2828.62	-158.672	7069.56	8739.06	3184.47	1727.44	2014	916.781	328	6443.56	3590.56	1642.25	7069.69	6632.28	2319.62	589.438	1652.78
9.68278	4139.44	66.9219	8404.25	8126.44	2591.31	2228.94	1956.81	1535.34	343.125	5149	3808.75	1386.12	7757.94	6438.06	1281.12	0	1635.12
9.68258	4842.88	389.75	8096.38	7204.62	2123.81	2461.75	1840.06	2174.59	504.625	3691.19	4327.56	551.25	7986	6333.09	740.25	229	2023.38
9.68238	4638.69	710.984	5844.25	6442.31	2151.56	2852.69	1534.44	2648.53	1313.75	2917.25	5026.97	58.75	7933	6363.12	927.75	1178.62	2585.97
9.68218	3186.12	785.781	3274.62	6729.44	2678.44	3363.88	933.312	2809.16	2557	3075.5	5639.06	757.688	7491.38	6502.22	1148.5	1034.69	2973.12
9.68198	1152.56	554.109	2223.31	8155.38	3347.25	3408.5	298.688	2697.38	3194	3492.31	5921.62	2223.56	6804.75	6633.84	901.875	0	3116.16
9.68179	-88.5625	179.719	2790.31	9595.69	3730.16	2678	286.625	2497.19	2727.38	3591.88	5699.84	3198.88	6764	6769.78	540.375	0	3168
9.68159	-82.9375	-210.203	3727.88	9998.69	3573.03	1572.81	1264.81	2352.41	2049.88	3620.31	4960.78	3133.5	8054.62	7074.75	549.25	0	3148.62
9.68139	272.75	-599.422	4299.75	9588.31	2939.72	730.688	2617.25	2262.75	2263.88	3950	4014.31	2698.94	9953.81	7575.62	867.75	0	2887.41
9.68119	219.625	-870.484	4866.25	9215.62	2235.69	446.875	3234.75	2153.81	3114.25	4339.88	3356.03	2686.88	10946.8	8023.59	1430.62	0	2307.94
9.68099	192.938	-775.062	5745.06	9069.12	1967.06	632.938	2828.94	1996.03	3379.25	4488.06	3175.84	3028.44	10531.9	8178.34	2724.5	0	1563.47
9.68079	917.375	-253.797	6435.44	8861.94	2336.44	1096	2233.56	1831.06	2590.88	4759.81	3123.41	3271.62	9688.75	8129.97	4972.88	0	850.938
9.68059	2179.44	388.703	6301.44	8821	3087.25	1706.81	2203.75	1722.12	1566.75	5590	2755.59	3532.44	9456.19	8241.03	7119.75	0	242.25
9.6804	3167.31	788.359	5456.69	9397.81	3761.81	2332.12	2531.88	1715.41	1212.12	6502.44	2106.22	4302.31	9692.75	8819.53	7574.12	0	-250.156
9.6802	3618.94	894.156	4594	10204.8	4056.38	2665	2722.62	1819.81	1480.12	6572.62	1569.19	5402.81	9489.81	9866.22	6037.62	1285.19	-555.375
9.68	3977	908.297	4222.88	10370.2	3948.75	2281.19	2902.38	1973.75	1726.38	5808	1292.22	5791.38	8351.56	11054.7	3881.88	3156.38	-547.375
9.6798	4558.31	964.141	4305.12	9913.69	3607.75	1121.44	3407.5	2040.28	1600.38	5271	1010.38	4713.19	6639.88	11938.9	2562.88	3697.19	-115.375
9.6796	5125.69	1030.73	4459.38	9657.31	3218.88	-91.9375	3908.5	1898.38	1295.88	5637.62	532.938	2711	5074.75	12275.3	2264.25	3277.56	755.25
9.6794	5347.94	1082.53	4413.38	9775.88	2834.22	-308.062	3720.44	1586.97	1154	6283.12	90.9688	1154.56	4079.19	12172.4	2326.75	3237.19	1893.88
9.6792	5300.62	1185.58	4356.38	9659.12	2408.84	746.062	2840.5	1350.09	1252.5	6165.69	34.0625	918.062	3634.5	11868.1	2430.62	3975	2967.06
9.679	5301.31	1374.86	4733	9321.75	2029.94	2158.06	2023.94	1468.31	1391.62	5152.75	388.906	1793.12	3662.62	11415.1	2861.38	4362.81	3711.38
9.67881	5396.5	1539.66	5514.06	9581.94	1972.72	2771.62	1856.19	1946.78	1484.75	4000.62	903.156	3028.25	4341.12	10721.3	3799.38	3479.44	4149.91
9.67861	5266.38	1473.64	5999.81	10494.7	2352.81	2337.75	2245.19	2352.81	1844.88	3294.81	1380.22	4002.56	5778.44	9858.03	4761	2006.5	4474.5
9.67841	4696.56	1016.11	5785.88	11018.3	2837.91	1479.56	2732.06	2104	2732.88	2964.31	1782.75	4331	7440.88	9123.84	4933.88	1166.81	4718.78
9.67821	3911.25	167.297	5560.44	10790.8	2980.78	731.375	2816.69	1087.72	3551.38	2801.19	2111.38	3809.06	8363.12	8763.28	4066.5	1014.19	4685.75
9.67801	3200.75	-876	6204.38	10809.2	2805.31	-1.5	2160.75	-38.5938	3099.5	2912.06	2373.16	2640.5	8125.81	8783.78	2889.5	748.375	4235.62
9.67781	2431.25	-1807.08	7305.25	11559.2	2782.41	-1032.62	1094.44	-380.5	1111.38	3442.19	2612.5	1524.31	7241.56	9085.97	2384.62	268.688	3520.25
9.67761	1407.94	-2402.12	7513.31	11910.9	3214.5	-2248.12	771.625	267.406	-952	4229.12	2806	1133.19	6365.5	9590.44	2644.38	298.938	2865.78
9.67742	637.5	-2666.23	6420.31	11004.5	3930.97	-3018.94	2050.31	1177.28	-1369.88	5012.25	2774.22	1474.44	5615.5	10153.7	2884.62	1039.5	2517.25
9.67722	986.375	-2770.52	5083.12	9925.12	4629.91	-2715.81	4210.62	1469	-146.875	5706.62	2368.94	1970.12	5000.25	10526.5	2693	1745	2553.38
9.67702	2333.75	-2830.77	4418.94	10057.2	5207.62	-1305.88	5573.88	973.469	1245.38	6195.62	1735.69	2149.69	4922.81	10529.2	2604.5	1894.44	2937.91
9.67682	3358.56	-2773.86	4095.19	10822.6	5652.03	556.625	5470	169.469	1908.12	6191.25	1250.97	2069.56	5620.56	10193.3	3007.38	1953.38	3530.28
9.67662	3243.06	-2462	3522.19	10712.9	5907.03	2066.06	4723.19	-525.469	2288.12	5720.38	1202.78	2065.5	6524.12	9667.44	3190.5	2559.38	4088.09
9.67642	2908.38	-1943	2988.31	9834.69	5990.62	2847.12	4062.69	-1069.78	2852.88	5437.44	1622.41	2320.38	6904	9072.25	2350.5	3549.12	4386.19
9.67622	3730.38	-1503.84	3042.62	9570.88	6006.06	2961.38	3205.44	-1468.03	3169.25	5838.56	2341.69	2736.88	6876	8486.69	1086.75	4246.06	4375.5
9.67603	5522.69	-1398.75	3479.12	10025.9	5923.47	2558	2053.69	-1549.84	2901.25	6355.44	3037.69	3088.25	6997.75	7956.56	818.25	4294.19	4194.84
9.67583	6802.44	-1549.34	3776.75	9716.25	5614.31	1830.56	1600.06	-1271.62	2791.88	5973	3292.94	3235	7106.06	7464.72	1827.25	3789.31	4017.09
9.67563	6834.19	-1621.88	4016.5	8023.69	5208.62	1203.19	2524.25	-976	3681.12	4709.12	2887.5	3261.25	6507.94	7005.91	2928	2922.56	3905.38
9.67543	6383.5	-1419.17	4571.06	6276.75	5091.72	1125.12	3666.56	-1069.62	5032.12	3658.38	2100.88	3343.19	5343.94	6724.22	3184.5	1921.94	3808.84
9.67523	6440.88	-1075.44	5341.88	5776.12	5362.31	1624.06	3238.5	-1525.47	5477.12	3477.31	1519.5	3396	4750	6814.94	2953.88	1105.88	3656.78
9.67503	7144.56	-807.703	6062.5	6024	5613.56	2389.62	1245.94	-1922.25	4757.25	3755.44	1457.56	3032.94	5302.19	7225.75	2973.5	586.312	3414.03
9.67483	8079.38	-624.781	6869	5740.69	5483.81	3268.38	-548.812	-1960.56	4165.75	4125.25	1742.28	2151.81	6115.62	7624.16	3334.25	94.3125	3035.41
9.67464	8744.94	-423.938	7750.06	4811.5	5106.56	4261.81	-991.25	-1772.16	4798.12	4878.94	2135.66	1421.44	6049.75	7770.34	3773.38	0	2417.81
9.67444	8562	-263.906	7977.25	4399.19	4730.62	5105.12	-618.812	-1695.59	6090.75	5880.44	2710.47	1719.56	5252.19	7765.88	4187.12	0	1503.44
9.67424	7342.31	-333.625	7119.19	5471.44	4222.53	5428.69	-279	-1863.06	6609.62	5977.19	3597.53	2985.75	4877.5	7816.75	4387.25	109.438	487.875
9.67404	6045.75	-668.891	6165.88	7732.88	3346.47	5356.75	36.5	-2047.5	5850.25	4532.5	4543.19	4045.69	5552.62	7924.47	4021.38	1841.12	-151.969
9.67384	6131.94	-1084.91	6379.06	9873.88	2304.66	5277	499.125	-1861	4655.88	2743.06	5031	3814.44	6694.81	7993.03	3210.25	3307.75	31.4375
9.67364	7666.88	-1408.92	7257.81	10691.1	1549.53	4958.12	716.125	-1104	3991.25	2264.5	4848.25	2420.19	7321.19	8100.25	2703.25	3437.38	1074.5
9.67344	8889.81	-1617.41	7098.56	10150.9	1181.66	3759.81	460.875	20.6562	3905.75	3089.81	4317.53	946.875	7141.75	8417.22	2979	2308.12	2564.66
9.67324	8244.62	-1714.77	5701.56	9356.5	950.5	1953.75	311.438	1029.75	3883.25	3975	3926.81	327.75	6744.56	8894.81	3719.75	1079.44	3976.31
9.67305	6132.5	-1651.38	4968.94	9289.44	769.375	819.625	744.75	1538.19	3726.38	4446.31	3888.03	691.188	6859.75	9246.97	4489.5	930.938	4999.34
9.67285	4044.88	-1437.03	6158.75	9796.69	811.719	883.938	1221.75	1530.81	3653.38	4983.56	4089.44	1495.12	7567.12	9282.22	5268.88	2005.75	5578.78
9.67265	2716.81	-1197.77	7852.62	10104	1122.16	1065.75	1037.06	1272.5	3722.38	5532.62	4303.47	1994.31	8299.44	9118.34	5917.62	3268.69	5767.03
9.67245	1994.94	-1029.28	7747.06	9880.31	1533.22	374.562	598.125	1023.72	3688.5	5441.5	4337.25	1794.12	8592.06	9042.06	5882.5	3488.25	5625.47
9.67225	1901.44	-905.234	5685.69	9219.06	1984.78	-491.625	879.438	895.562	3495.62	4935.12	4096	1264.81	8566.5	9249.91	5058	2486.06	5242.34
9.67205	2656.31	-814.781	3740.06	8060.56	2543.25	-339.438	1815.06	898.938	3441.75	5069.12	3631.34	1249.56	8503.56	9728.66	4294.12	1257.06	4778.56
9.67185	3797.19	-878.391	3561.38	6568	3071.19	523.375	2217.44	1002.94	3632.5	5847.81	3107.81	2079.31	8253.38	10289.6	4320.62	686.375	4435.38
9.67166	4367.56	-1206.56	4648	5776.44	3268.53	850.688	1410.62	1135.62	3673.5	5882.12	2661.03	3085.88	7468.69	10695.7	4679.88	470.125	4312.19
9.67146	4181.44	-1701.02	5310.19	6710.38	3144.5	533.312	165.75	1224.75	3244.62	4549.31	2315.22	3428.56	6243.31	10814.8	4433.25	0	4274.31
9.67126	4053.12	-2095.97	4661.12	8811.12	3088.38	616	-274.438	1276	2645.62	3153.62	2061.25	3162.62	5088.5	10669	3449.62	0	4047.16
9.67106	4434	-2162.5	3392.88	10347.3	3321.38	1391.56	411.75	1359.25	2362.25	3103.19	1932.06	2989.69	4401.81	10341.7	2252.38	0	3532.12
9.67086	4536.38	-1810.94	2854.38	10627.1	3582.22	1971.56	1493.31	1498.72	2400.75	4074.56	1916.56	3094.19	4363.31	9905.53	1054.25	0	2986.22
9.67066	3390	-1060.3	3513.94	10745.1	3518.84	1898.69	2101.56	1636.34	2605	4927.25	1856.91	2863.12	5113.88	9482.78	-148.625	455.5	2793.41
9.67046	1384.25	-29.9062	4384.88	11718.3	3137.03	1777.94	2029.62	1735.06	3340.88	5395.56	1563.97	1869.88	6446.62	9267.84	-841.5	962.062	3099.5
9.67027	104.375	1029.17	4179.44	12932.8	2706.66	1936.75	1789	1862.81	5048.88	5730.69	1066.81	558.25	7532.06	9371.75	-352.875	313.125	3772.72
9.67007	598.25	1796.16	2988.81	13156	2452.12	1757.81	2000.75	2109.38	7099.25	5515.62	659.875	-353.375	7727.81	9682.19	1022.88	0	4630.38
9.66987	2231.5	2078.12	2303.19	12309.7	2469.59	905.188	2649.25	2440.66	7967.75	4243.5	638.094	-754.625	7575.38	9964.03	2061.88	0	5491.62
9.66967	3478.31	1997.66	3119.38	11341.1	2710.41	67.125	3004.62	2703.19	6940.38	2684	1012.03	-1079.94	8085.25	10053.6	1866.75	0	6043.97
9.66947	3620.56	1952.64	4583.19	10717.1	2902.94	-215.562	2455.56	2785.34	5023.25	2311.31	1533.28	-1588.19	8994	9893.12	537.125	495.938	5972.47
9.66927	3328.94	2274.17	5015	9898.62	2740.41	-475.25	1310.31	2706	3728.12	3341.12	1977.12	-2001.25	8860.44	9479.12	-1308	1477	5367.09
9.66907	3570.81	2854.14	3884.75	8326.38	2319.41	-1283.31	531.5	2500.47	3485.25	4428.94	2334.59	-1753.44	7296.88	8914.66	-2982.62	1713.94	4762.09
9.66887	4380.5	3200.89	2160.25	6409.88	2145.69	-2096.69	772.25	2108.28	3736.75	4537.75	2723	-446.062	5945.81	8455.75	-3738.75	1122.69	4546.06
9.66868	5049.56	2969.77	966.062	5332.25	2483.94	-1987.12	1904.88	1514.16	4088.38	4221.56	3196.06	1754.62	6384.44	8346.66	-3133.88	410.562	4485.56
9.66848	5228.44	2350.03	618.625	5931	2930.91	-950.938	3314.94	986.656	4650.62	4637.44	3716.41	3984.75	7946.5	8602.47	-1626.25	322.625	4087.09
9.66828	5214.75	1774.83	936.75	7781.69	2909.84	253.625	4277.12	981.781	5439.75	5859.25	4262.91	5139.5	8735.06	9040.31	-226.875	825	3340.81
9.66808	5163.69	1354	1752.62	9509.88	2430.12	1094.69	4160.81	1689.72	6099.38	6710	4839.47	4748	8251.25	9484.59	644.375	1447.62	2811.28
9.66788	4743.62	856.562	2831.12	10125.8	2048.34	1446.62	2774.5	2790.28	6261.5	6176.88	5359.12	3387.62	7770.25	9842.47	1449.88	2172.88	2967.66
9.66768	3911.88	227.875	3756.38	9790	2145.56	1293.81	656.312	3787.78	5796.25	4680	5642.62	2116.75	8264.25	10047.1	2561.5	3300.44	3669.12
9.66748	3388	-220.016	4243.56	9049.81	2526.41	947	-1243.5	4475.44	4772.5	3709.19	5621.38	1538.31	9175.44	10093.7	3600.75	4533.94	4395.88
9.66729	3741.56	-267.5	4359.69	7927.31	2740.25	1114.25	-2236.75	4897.41	3527.38	4118.25	5464.81	1453.06	9481.19	10120.1	4050	5049.19	4785
9.66709	4435.5	-147.625	4288.56	6467.12	2573.56	2060.38	-2113	4985.19	2681	5045.19	5402.97	1281	8969.5	10294.8	4018.5	4673.81	4815
9.66689	4516.25	-220.156	4130.12	5611.56	2161.25	3064.81	-910.062	4557.41	2656.75	4970.94	5478.56	740.562	7987.31	10588.9	3986.12	4218.31	4631.81
9.66669	4032.5	-478	4063.75	6321.06	1752.19	3361.94	1044.62	3726.09	3191	3709.81	5595.34	210.375	6695	10764	4074.25	4253.38	4387.34
9.66649	3932.19	-624.25	4404.56	8003.44	1441.81	3225.62	2862.19	2999.88	3630.88	2628.94	5765.38	402.438	5215.06	10612.8	3923.62	4255.62	4193.88
9.66629	4530.69	-509.5	5215	9131.81	1121.62	3404.88	3408.88	2805.12	3660.62	2783.69	6125.72	1487.44	4068.25	10149.8	3179.5	3506.62	4064.06
9.66609	4962.06	-241.094	6020.75	9473.25	714.75	3840.94	2237.88	3069.72	3443	3707.88	6672.56	2637.19	3767.56	9595.28	1918.5	2272.81	3865.62
9.6659	4501.69	62.6406	6180.12	10258.5	432.219	3780.75	90.1875	3422.53	3171.5	4479.19	7151.59	2827	4092.81	9247.78	727	1441.31	3431.12
9.6657	3689.06	372.266	5514.25	11838.9	629.938	3002.94	-1629.12	3643.19	2875.5	5083.38	7320.91	2106.44	4302	9294.56	366.875	1387.81	2753.66
9.6655	3527.62	626.641	4419.69	12840.8	1337.88	2142.38	-1848.19	3745.44	2597.12	5915.88	7206.75	1557.12	4094.81	9613.38	1051.12	1868.69	2032
9.6653	4040.25	745.984	3399.81	12434	2118.28	1812	-555.688	3758	2336.5	6614.38	6971.22	1845.56	3937.25	9816.25	1963.12	2711.12	1506.31
9.6651	4318.12	780.859	2630.88	11857	2541.53	2089.19	1088.62	3641	1818.5	6451.94	6621.31	2438.25	4289.94	9648.81	1907.38	3860.94	1278.69
9.6649	3783	855.062	1991.81	12459.9	2633.97	2921.31	1523.12	3375.56	722.75	5606.38	6025.66	2618.88	4891.25	9305.34	693.375	4899.19	1295.47
9.6647	2725.31	941.938	1415.88	13574.7	2665	4392.62	194.312	2977.34	-768.625	5022	5207.28	2614.25	5133.56	9188.72	-481.625	5270.19	1449.19
9.6645	1658.19	881.984	1143.25	13839.9	2670.53	6348.81	-1737.31	2461.59	-1944	5045.94	4452.97	3025.88	4936.94	9420.97	-381.625	5041.31	1655.47
9.66431	850.375	657.625	1564.69	13554.4	2476.31	8139.12	-2543.06	1921.12	-2163.62	5102	4067.31	3660.38	4785.81	9794.31	827	4837	1854.31
9.66411	644.5	475.062	2741	13915.3	2093.84	8962.25	-1841.38	1566.69	-1329.38	4822.25	4111.16	3838.38	4897	10131.3	1945.88	4958.88	2004.31
9.66391	1519.19	516.516	4133.31	14644	1758.56	8387.12	-909.75	1541.28	136.875	4654.94	4441.72	3613.88	4892.31	10390.2	2374.88	5110.31	2114.38
9.66371	3347.06	760.953	5008.06	14342	1576.56	6624.81	-1004.62	1749.34	1523.5	5004.5	4934.69	3666.5	4568.25	10420.6	2725.62	5046.31	2248.09
9.66351	5025.06	1107.64	5172.88	12927	1441	4458.06	-1927.5	2011.88	2184.75	5409.5	5574.53	3982.69	4462.12	9995.47	3658	4937.19	2443.84
9.66331	5447.69	1536.78	5128.19	11774.2	1348.72	2736	-2522.69	2304.16	2022.62	5094.5	6335.69	3711.38	5069.25	9239.44	4739.5	4954.44	2648.97
9.66311	4741.31	2069.92	5386.38	11401.1	1483.41	1705.31	-2098.56	2641.59	1532.75	4067.56	7054.31	2639.38	5838	8713.72	5015.38	4986.56	2802.41
9.66292	4070.62	2679.66	5859.94	10930.6	1850.69	966.438	-943.188	2796.06	1122	3207.94	7474.09	1795.12	5747.88	8844.25	4415	4912.25	2978.28
9.66272	4255.12	3296.84	6142.44	10193.9	2105.66	198.562	254.312	2405.47	639.125	3221.06	7430.38	1984.25	4844.44	9476.59	3872.88	4749.12	3346.47
9.66252	5017.25	3806.31	6206.38	10428.5	1965.78	-388.375	1073.56	1447.59	-28	3780.56	6970.53	2564.94	4338.75	10185.8	3995.62	4473.06	3945.03
9.66232	5641.88	4004.88	6465.94	12059.6	1626.78	-505.438	1582.12	411.5	-297.25	3961	6286.94	2515.44	4950.25	10772.4	4309.62	4128.12	4583.94
9.66212	5901.12	3719.84	7152.31	13444.6	1550.5	-273.375	2156.62	-125.594	449.75	3518.75	5568.5	2112	5957.88	11190.1	4220.88	4079.62	5059.72
9.66192	6039.62	3066.03	7945.06	12988.6	1934.16	44.3125	3000.06	1.3125	1790.62	3349.19	4955.84	2519	6343.56	11231.9	4114.88	4550.5	5383
9.66172	6142.62	2449.17	8316.69	11293.1	2579.03	396.25	3742.94	516.875	2720.62	4296	4577.62	3914.31	6182.56	10695.4	4779.88	4895.19	5667.84
9.66153	5936.69	2170.05	8031	10018.4	3218.38	698.938	3747.94	1043.91	3136.88	5836.75	4489.59	5014	6277.81	9777.69	6025	4133.94	5847.88
9.66133	5253.31	2099.52	7253.19	9601.12	3779.25	685.75	2909.12	1368.81	3876.25	6655.94	4545.78	4623.75	6911.81	8935.53	6709.25	2440.81	5674.47
9.66113	4439.44	1883.66	6398.19	9353.38	4320.41	423.312	1837	1457.59	5104	6421.81	4466.69	2979.44	7611.88	8353.72	6200	1274.19	5039.84
9.66093	4108.44	1422.89	5914.25	9045.75	4854.81	531.062	1106.06	1358.59	5709.88	6104.06	4131.53	1327.94	7797.25	7880.47	5068.88	1586.75	4182.81
9.66073	4486.62	998.906	5922.75	9009.38	5256.75	1370.31	676.5	1143.53	4802.75	6405.25	3710.16	671.875	7074.31	7499.25	4152.75	2655.25	3505.69
9.66053	5152.44	923.547	5978.5	9094	5276	2385.62	278.562	916.969	2979.25	6907.62	3414.38	1098.12	5286.12	7490.88	3604.75	3225.81	3251.84
9.66033	5542.19	1198.8	5496.69	8811.62	4688.72	2750.81	-27.0625	815.469	1531.25	7157.44	3234	1927.88	2954.25	7981.78	3198	3072.25	3401.59
9.66013	5572.81	1582.36	4546.31	8340.38	3559.44	2304.5	-24.0625	904.438	1094.25	7466.88	3067.25	2353.38	1316.69	8637.41	2909	2718.56	3791.81
9.65994	5499.19	1890.98	3858.19	8281.62	2336.44	1400.31	236.688	1055.12	1625	7910.88	3010.34	2221.25	1115.19	9020.12	2702.12	2369.31	4245.03
9.65974	5275.94	2131.89	3869.06	8544.38	1553.66	331.375	594.062	1031.53	2923.75	7622.88	3297.66	2199.25	1552.94	9059.53	2235	2097.06	4609.81
9.65954	4609.06	2355.36	4206.56	8519.75	1401.03	-533.125	1150.19	777.656	4397.25	6182.56	3967.28	2815.38	1267.31	8967.22	1352.5	2505.12	4769.44
9.65934	3778.44	2492.92	4426.5	8277.5	1653.72	-613.312	2084.12	526.375	4946	4813.19	4777.06	3486.94	164.812	8846.97	525.125	3954.75	4676.78
9.65914	3711.56	2424.25	4735.5	8497.81	1989.72	126.188	3193.81	531.469	4031.25	4849.56	5462.22	3184.12	-633.062	8624.88	234.125	5362.81	4408.31
9.65894	4701	2169.27	5432.75	9155.56	2237.41	779.875	3962.19	804.969	2504.5	5608.31	5894.19	2068.75	-586.125	8295.62	216.5	5089.19	4166.91
9.65874	5639.25	1909.89	6094.12	9400.81	2319.41	684.375	4042.69	1251.09	1602.12	5245.06	5990.12	1522.12	-357.875	8013.06	-99.625	3176.94	4150.56
9.65855	5349.62	1786.11	6086.12	9006.56	2174.81	513.562	3481.56	1913.66	1485.75	3437.12	5707.06	2129.81	-413.312	7907.12	-591.875	1528.38	4351.59
9.65835	4262.44	1757.2	5632.88	8842.56	1891.34	1235	2613.06	2843.72	1540	1750.38	5201.69	2597.31	-142.25	7929.5	-477.125	1477	4540.41
9.65815	3727.69	1739.28	5496.12	9420.88	1793.5	2425.44	1970.5	3784.59	1626.5	1402.25	4771.56	1561	984.5	7906.72	702.375	2251.81	4539.12
9.65795	3873.31	1806.28	5687	9970.56	2189.69	2796.44	2099.31	4280.69	2018.25	2063.62	4525.25	-204.25	2287.25	7698.28	2581.88	2416.12	4455.19
9.65775	3433	2127.52	5444.88	9702.44	3022.81	2162.12	3100.06	4153.78	2393.62	2978.56	4307.25	-605.125	2772.31	7326.72	4395.75	1852.38	4508.78
9.65755	1891.12	2712.56	4600.5	9216.31	3903.56	1643.5	4406.31	3654.47	2074.62	3877.06	4051.5	944.75	2589	6990.75	5463.88	1447.81	4668.28
9.65735	476.562	3330.72	3960.94	9680.31	4508.88	1942.5	5267.56	3097.34	1280.88	4447.25	3946.09	2772.19	2688.94	6891.06	5360.25	1479.44	4658.19
9.65716	417.625	3711.53	4009.19	10999.9	4822.03	2630.38	5389.62	2580.56	1079	4172.5	4044.91	3218.88	3313.25	6992.25	4127.88	1350.38	4370.94
9.65696	1343.81	3749.66	4193.5	11763.5	4962.81	3277	4923.44	2142.38	1899.25	3199.56	3976.12	2523.31	3693.25	7044.47	2429.5	739.125	4068.38
9.65676	2252.75	3503.06	4061.56	11005.4	4963.72	4067	4029	1938.31	3003.75	2374.44	3378.56	1926.31	3253.5	6919.34	1154.38	152.188	4053.69
9.65656	3100	3085.3	4210.19	9314.38	4849.81	4963.56	2800.69	2089.41	3586.5	2018.44	2503.03	1923.31	2416.44	6840.34	781.125	256.062	4299.59
9.65636	4392.88	2597.64	5303.5	8060.19	4800.53	5353.94	1549.19	2509.97	3510.5	1632.81	2006.12	2248.12	2052.88	7164.75	1239.88	1191.69	4551.47
9.65616	5913.69	2098.95	6793	8029.69	4987.03	5005.44	780.688	3031.06	2807.75	1124.12	2136.06	2842.88	2577.25	7991.59	2188.62	2586.5	4673.44
9.65596	6953.38	1613.41	7484.56	8958.75	5237.62	4497.12	762.812	3552.84	1497	1198.44	2441.16	3774	3690.81	9083.91	3140.62	3829.31	4718.84
9.65576	7364.31	1213.81	6974.88	10009.2	5101.03	4276.19	1222	3948.84	254.375	2081.06	2364.56	4531.06	4693.56	10110.5	3575.12	4351.19	4751.28
9.65557	7395.19	1062.92	5759.31	10504.3	4385.84	4072.12	1501.62	3994.69	206	2976.81	1876.12	4471	5013	10838.2	3384.25	4059.31	4792
9.65537	6920.56	1240.89	4326.06	10419.1	3508.38	3623.44	1038.75	3586.66	1422.75	3402.19	1406.62	3884.56	4710.94	11156.5	3104.38	3556.69	4898.31
9.65517	5855.12	1521.14	2982.88	10279.4	3124.16	3208	-128	2916.19	2493.38	3923.12	1354.31	3652.69	4437.19	11109.9	3319	3612.44	5094.69
9.65497	4932.25	1487.56	2267.25	10487.5	3455.28	3074.75	-1241.88	2240.91	2336	4817.38	1767.41	3784.88	4605.62	10936.8	3970.38	4349.44	5227.84
9.65477	4960	973.531	2592.31	10807.3	4136.56	3064.5	-1451.25	1576.09	1683.88	5135.94	2355.78	3300	4775.62	10921.5	4604.88	5169.38	5076.44
9.65457	5580.12	274.172	3551.75	10728.9	4709.78	3094.5	-682.375	807.094	1929.88	4121.75	2704.31	1849.19	4319.31	11136.3	5053.5	5443.56	4631.09
9.65437	5872.44	-176.594	4321.75	10248.4	5077.03	3265.44	359.25	23.6875	3116.75	2622.62	2593.78	509.438	3603.94	11403.6	5378.12	5041.5	4104.72
9.65418	5912.31	-239.156	4653.06	9936.5	5395	3247.38	1156.5	-497.844	4067.12	1920.69	2204.16	410	3828.62	11524	5401.88	4246.56	3641.81
9.65398	6479.88	-78.9688	4791.31	10160.8	5692.12	2455.62	1910.12	-646.156	4137.25	1898	1922.56	1313.38	5452.12	11440.2	4911.5	3448.56	3189.91
9.65378	7396.44	134.75	4665.12	10543.1	5766.16	1173.06	2825.06	-597.281	3784.25	1658.69	1931.69	2219.44	7359.12	11159.5	4174.75	2912.69	2696.5
9.65358	7554.88	373.75	4044.44	10337.6	5428.69	561.5	3400.31	-540.094	3443.75	1421.75	2116.81	2773.38	8024.31	10655.7	3590	2610.19	2238.66
9.65338	6708.44	645.734	3356.31	9191.88	4719.16	1134.31	3035.19	-441.219	2805.5	2297.81	2375.41	3314.19	7163.06	9920.41	2956	2300.12	1854.69
9.65318	5862.94	905.984	3320.31	7498.62	3870.69	2146.94	2010.56	-153.531	1476.25	4269.62	2795.66	3960.44	5810.44	9026.84	1859.38	1969.12	1416.06
9.65298	5608.25	1076.34	3726.12	6198.25	3158.94	2933.5	1110.38	361.812	-219.375	5795.19	3442.78	4486.44	5045.19	8087.16	752.25	2030.81	813.125
9.65279	5354.44	1057.08	3619.25	6204.94	2801.47	3767.75	382.188	996.375	-1375	5759.56	4187.75	4897.25	5117.94	7222.5	709.5	2744.56	154.844
9.65259	4610.94	763.125	2898	7633.94	2905.81	4756.69	-879.062	1601.88	-1202.62	4803.38	4898	5379.19	5657.81	6609.06	1867.75	3576.94	-351.875
9.65239	3771	267.828	2651.31	9442.62	3426.69	4985.69	-2729.19	2076.84	333.75	4292.75	5609.62	5794.69	6154.69	6425.69	2972.25	3673.06	-621.312
9.65219	3141.06	-147.797	3477.81	10209.8	4166.81	3714.06	-3978.25	2394.09	2223.5	4732.12	6318.5	5882.88	6178.5	6655.47	2942.25	3039.38	-650.531
9.65199	2430.38	-257.484	4490.56	9564.94	4845	1610.62	-3576.06	2586.91	2923	5651.56	6758.38	5788.19	5622.88	7024.81	2218.25	2731.94	-374.844
9.65179	1801.94	-179.188	4659.06	8553.81	5210.09	-87.4375	-2122.5	2692.22	1730.62	6489.69	6645.69	5663	4955.06	7251.09	2035.62	3575.56	235.344
9.65159	2172.62	-210.328	4298.56	8281.75	5168.78	-910.438	-1274.44	2701.81	-336.375	7064	6100.88	4968.38	4910.19	7313.22	2903.88	5050.5	968.688
9.65139	3670.5	-357.141	4373.25	8552.69	4864.69	-848.062	-1707.94	2583.34	-1532.75	7422.94	5605.34	3174.38	5721.12	7399.84	4339	5802.38	1466.03
9.6512	4948.88	-239.312	4914.31	8375.81	4581.25	363.562	-2319.5	2314.09	-1270.75	7609.88	5520.03	1177.12	6840.25	7642.94	5618.88	5070.12	1556.34
9.651	4988.19	443.203	5078.81	7575.06	4468.28	2532.56	-1747.19	1846.31	-505.25	7528.25	5792.53	832.312	7531.94	7986	6188.12	3332	1365.56
9.6508	4556.44	1517.95	4525.38	7136.19	4363.84	4329.69	-251.875	1095.62	-240.25	6943.81	6139.69	2589.25	7509.75	8270.06	5686.75	1716.94	1080.62
9.6506	4833.88	2528.62	3860.25	7864.62	3986	4575.38	509.625	76	-344.875	5733.12	6367.94	4571.88	6917.75	8371.88	4267.62	1083.5	755.875
9.6504	5524.12	3164.86	3694.94	9404.69	3323.19	3756.81	-413.438	-956.094	-128.375	4159.75	6471.03	4762.44	6042.19	8298.19	2773.5	1563.31	394.656
9.6502	5547.56	3360.5	3928.69	10884.8	2731.31	3153.81	-2028.94	-1618.97	544	2782.25	6514.22	3384.5	5249	8214.75	2042.88	2660.38	78.9688
9.65	4874	3107.91	4149.19	11880.6	2582.56	2955.75	-2710.94	-1741.78	1255	2077.38	6485.22	2263.06	4839.75	8324.09	2052.38	3736.69	-61.6562
9.64981	4366.31	2424.34	4314.31	12270.9	2894.16	2469.25	-2303.06	-1529.81	1786.62	2188.44	6256.78	2349.25	4654	8640.97	2105.88	4556.38	84.375
9.64961	4282	1516.83	4746.38	11792.3	3378.09	1777.19	-2130.5	-1329	2272.12	2898	5726.91	2895.12	4155.12	8969.28	1749.12	5311.06	614.375
9.64941	4175.5	789.172	5565.44	10576.8	3781.12	1787.62	-3001.88	-1249.41	2700.12	3781.31	5005.66	2907.69	3330.94	9195.16	1127	5976.5	1546.47
9.64921	3962.88	554.125	6352.25	9771.25	4066.97	2732.06	-4121.75	-1085.59	2791.5	4618.69	4362.25	2402.31	3157.88	9500.59	587.625	5876.44	2666.5
9.64901	3914.38	744.781	6585.5	10567.1	4301.34	3873.19	-4304.44	-622.625	2477.38	5733.31	3923.59	1972.75	4513.69	10119.7	364.875	4359.19	3565.66
9.64881	3828	946.797	6455.75	12496	4501.75	4700.56	-3418.5	36.4062	2134.12	7515	3539.81	1826.56	6776.88	10950.3	547.125	1937.5	3971.84
9.64861	3335.81	751.438	6877.88	13605.2	4656.22	5256.94	-2041.94	516.75	2155.88	9419.31	3054	1670.44	8299.25	11611.9	914.375	198.75	3996.78
9.64842	2865.56	133.125	8278	12714.6	4808.16	5302.44	-445.438	556.375	2491.38	10041.8	2579.28	1235	8410	11884.6	894.25	181.062	3958.53
9.64822	3186.44	-519.844	9665.19	10769.8	5043.47	4410.81	1219.12	272.344	2798.88	8746.19	2345.38	605.75	8164.25	11904.8	195	1158.31	4018.53
9.64802	4083.31	-815.234	9617.06	9462.56	5389.72	3046	2293.31	-22.9062	2965.25	6736.06	2370.62	126.25	8670.12	11901.6	-534.25	1558.31	4091.19
9.64782	4554.44	-789.562	8122.88	9196.94	5749.94	2339.31	2277.25	-204.969	3259.25	5694.5	2486	60.375	9370.69	11939.8	-269.75	961.062	4032.38
9.64762	4304.75	-808.359	6606.5	9168.88	5936.75	2518.75	1888.94	-391	3922.5	5628.5	2617.53	272.375	8801.81	11982.7	990.125	552.312	3771.09
9.64742	3988.12	-1025.86	5994.31	8948.94	5779.22	2669.25	2340.12	-606.938	4757.38	5062.06	2814.31	307.375	6811.31	12011	1953.62	1437.12	3290.47
9.64722	3947.31	-1155.97	5710.81	8969.75	5220.84	2336.25	3537	-597.906	5286	3407.81	3017.72	-34.25	5140.12	11956.8	1523.12	3135.56	2638.41
9.64702	3826.31	-908.25	4979.38	9488	4340.53	2194.44	4076.81	-127.719	5320.5	2018.38	3058.16	-303.5	5493.69	11662.2	135.875	4259.38	1972.53
9.64683	3598	-440.375	4119.56	10008.9	3317.34	2680.31	3244	620.594	5186.5	2303.25	2926.97	136.438	7516.62	11048.6	-828.5	4276.75	1463.53
9.64663	3869	-126.141	3794.12	10041.6	2409.03	3135	1959.44	1131.16	5233.88	3667.94	2812.22	1238.88	9127.81	10246.1	-682.375	3898	1129.84
9.64643	4782.75	-1.07812	3770.56	9761.56	1919.94	2996.88	1338.69	1065.25	5247	4289.62	2768.91	2115.88	8776.81	9468.31	61.5	3809.06	888.406
9.64623	5571.75	246.453	3419.06	9541.75	2049.31	2841.69	1293.19	574.438	4641	3557.75	2574.94	1887.25	7046.81	8848.66	645.75	3806.12	781.562
9.64603	5670.31	750.75	2911.25	9322.31	2683.22	3391.94	1200.88	88.3438	3333.38	2687.75	2077.78	626.688	5899.81	8482.47	896	3454.25	984.188
9.64583	5488.19	1259	2867.69	8901.81	3407.19	4280.12	1115.31	-92.2812	2129.5	2814.31	1536.25	-603.062	6516.31	8502.44	985.25	2964.81	1499.44
9.64563	5596.81	1534.78	3118.38	8524.19	3839.81	4684.31	1448.81	56.7188	1920	3477.25	1428.41	-731.875	8178.38	8953.62	958.125	2879.06	1989.25
9.64544	5812.56	1693.73	2912.81	8689.56	3952.62	4563.94	2007.44	420.625	2579.62	3594.88	1966.78	231.562	9332.5	9630.75	839.75	3220	2061.84
9.64524	5587.12	1965.08	2309.31	9474.56	4013.31	4318.56	2252.69	879.281	3076.62	3248.31	2912.97	1224.38	9364.31	10156.5	853.625	3532.12	1693.88
9.64504	4786.38	2306.17	2290.94	10384.9	4269.44	3676.94	2247.25	1296.56	2800.25	3513.94	3813.25	1452.56	8938.5	10230.6	1140.5	3660.88	1268.97
9.64484	3666.69	2448.42	3290.81	10878.1	4764.44	1980.62	2515.31	1499.84	2361.75	4656.69	4328.78	1463.06	8846.5	9802.72	1459.75	3979.94	1227.34
9.64464	2545.75	2236.69	4497.62	10862.4	5387.34	-530.062	3064.5	1381.78	2680	5532.88	4419.5	2345.56	9170.56	9108.25	1518.38	4763.5	1744.81
9.64444	1825.38	1787.92	4967.44	10733	5946.91	-2626.69	3295.31	1010.84	3558.62	5196.62	4344.53	3957	9653.06	8575.56	1416.25	5678.44	2684.69
9.64424	1849.62	1378.92	4721.31	10993.3	6219.81	-3431.5	2945.06	542	3821.62	4304.38	4464.88	4821.5	10185	8542.88	1427	6030.75	3730.84
9.64405	2409.94	1252.5	4368.69	11703.2	6097.94	-3205.44	2512.31	-12.625	2896.12	4209.81	4944.31	4138.81	10516.3	8939.03	1524.25	5355.88	4564.66
9.64385	2888.44	1426.97	4259.88	12230	5738.12	-2650.19	2555.06	-801.406	1588.25	5141	5630.03	2975.5	10013.2	9331.41	1537.88	3775.12	5029.47
9.64365	3201.94	1613.66	4433.88	11798.5	5445.09	-2016.38	2952.38	-1801.47	974.75	6102.5	6253.41	2688.56	8340.56	9384.53	1603	1960.38	5192.53
9.64345	4025.19	1451.77	4893.31	10439.9	5373.78	-1221.56	3040.75	-2564.75	1102.75	6334.12	6687.88	2904.25	6185.31	9172.25	1939.5	718.375	5231.16
9.64325	5654.44	932.312	5426.19	9128.19	5463.44	-430.875	2316.88	-2524.44	1288.38	5989.88	6942.66	2196.25	4726.94	8964.25	2265.88	415.875	5256.41
9.64305	7224.75	459.859	5510.31	8722.81	5662.94	-26.5625	1010.25	-1615.47	1210.5	5425.94	6974.34	429.75	4372.25	8875.66	2036	820.75	5278.34
9.64285	7649.5	371.828	4912.31	9009	6015.94	-44.6875	84.9375	-420.938	1009.62	4733.19	6647.19	-842.375	4409.19	8863.47	1306.75	1581.56	5318.78
9.64265	6915.06	529.766	4184.12	9084.88	6438.25	-25.25	477.188	402.844	654.5	4145.5	5923.62	-460.75	3958.12	8886.66	756.375	2619.06	5476.34
9.64246	5822.94	531.531	4079.62	8527.12	6630.91	402.562	2068.38	720.125	80.25	4045.88	5029.94	923.875	2975.38	8867.78	702.75	3805.38	5825.41
9.64226	4788.5	198.391	4513.88	7830.06	6412.38	1008.5	3604.06	842.062	-153.625	4251.25	4364.06	1881.5	2258	8661.06	713.125	4603.06	6257.41
9.64206	3641.44	-320.609	4508.31	7760.81	6010	1298.06	3934.94	1030.62	688.75	4079.62	4199.12	1835.88	2593.81	8309.34	428.25	4575.81	6463.88
9.64186	2485.94	-802.609	3284	8565.31	5800	1197.94	3119.44	1281.03	2221.38	3503.38	4463.5	1247.5	3864.94	8195.78	162.875	4118.75	6151.03
9.64166	1946.75	-1105.19	1215.31	9769.44	5817.94	970.312	1990.94	1510.44	2972.12	3418.69	4837.38	828.75	4941.25	8636.91	353.125	4065.56	5338.19
9.64146	2307.94	-1172.03	0	10560.5	5751.09	496.812	1037.38	1706.44	2135.12	4247.12	5090.06	1048.44	4711.62	9414.62	966.875	4564.12	4416.84
9.64126	2951.69	-1115.39	0	10476.9	5414.72	-659.562	330.5	1837.34	587	5083.5	5271.22	1944.75	3355.75	10029.7	1805.25	4967.12	3812.47
9.64107	3065	-1218.14	968.25	9946.31	5005.38	-2187	233.375	1797.97	-293.75	4974.19	5514.47	3003.31	2229.88	10346	2783	4907.94	3580
9.64087	2659.06	-1601.86	2744.5	9980.31	4798.44	-2779.44	1204.19	1547.88	-156.75	4358.69	5740.75	3526.81	2234.75	10598.7	3512.88	4771	3457.44
9.64067	2490.19	-1934.2	3577.75	11033.4	4781.34	-1693.81	2786.81	1204.72	527.125	4362.69	5725.03	3368.44	2771.12	10784.5	3343.38	4864.19	3336.31
9.64047	2991.62	-1739.94	3118.12	12301.7	4744.94	-34.1875	3730.19	911.531	1517.75	5160.31	5450.25	2980.44	2796.44	10523.6	2424.62	4890.19	3466.97
9.64027	3640.5	-1019.28	2101.19	12508.8	4652.62	462	3549.19	670.719	2808.38	5994.25	5206	2655.88	2423.06	9694.22	2030.62	4699.69	4044.44
9.64007	3601.19	-299.938	1426.62	11294.6	4733.69	-325.75	3219.38	391.719	3927.38	6491.69	5258.06	2228.06	2636.44	8782.84	2960.75	4863.06	4775.78
9.63987	2820.38	-26.6094	1152.12	9474.25	5167.44	-871.562	3721.25	81.3438	4119.5	6982.94	5557.91	1659.62	3641.5	8312.94	4171.75	5812.12	5139.34
9.63968	2130.31	-145.891	593.75	8052.25	5770.12	-153.125	4516.25	-87	3250	7642.94	5853.44	1317.12	4473.12	8215.72	4002.12	6940.06	5022.22
9.63948	2211.69	-363	0	7457.25	6086.94	1261	4290.81	69.2188	1977.25	8191.31	5948.38	1381.81	4425.06	8073.41	2412.75	7336.56	4817.47
9.63928	2792.5	-541.641	0	7701.19	5800.56	2440.94	2868.75	520.25	1041.62	8394.25	5760.94	1558.5	4010.25	7767.56	965	7066.5	4863.03
9.63908	3096.38	-698.469	0	8681.25	5013.59	3271.88	1460.88	989.969	768.875	8116.56	5288.34	1672.81	4091.62	7553.44	760.5	6902.88	5070.22
9.63888	2822.75	-808.375	1669.25	10087.7	4122.84	3906.69	1027.75	1189.19	1097.88	7041.62	4675.12	1976.94	4695.75	7630.34	1444.88	7012.56	5208.88
9.63868	2358.44	-812.203	3688.94	11432.6	3463.03	4036.12	1257.94	1086.28	1622.38	5221.25	4210.09	2516.19	5189.75	7968.62	2204.38	6773.31	5278.78
9.63848	2188.94	-720.906	4192.19	12436.8	3093.06	3458.25	1402.44	896.094	1748.62	3778.19	4069.91	2796.12	5193.44	8516.12	2660.75	5860.56	5378.19
9.63828	2476.31	-580.828	3560.12	13134.2	2847	2680	1353.06	794.5	1283.12	4004.81	4099.91	2490.81	4802.56	9274.81	2619.5	4691.31	5400.56
9.63809	3154.38	-413.062	3101.88	13512.6	2497.38	2206.75	1403	724.375	728.625	5622.81	3988.44	1890	4191.25	10141.9	1908.5	3691.19	5147.72
9.63789	4059.69	-257.75	3188.19	13466.6	1911.91	1788.56	1496.69	526.125	601.375	6939.69	3635.28	1233.75	3492.06	10887.5	812.25	2857.69	4674.25
9.63769	4914.25	-162.75	3060.25	13258.2	1184.78	1105.75	1368.44	169.875	725.625	6997.81	3251.31	325.562	2966.56	11333.8	-16.375	2190.38	4264.19
9.63749	5459.12	-55.4844	2418.25	13488.2	620.5	661.188	1139.31	-221.938	685.875	6577.75	3149.31	-602.875	2911.62	11430.8	-269.5	1840.31	4065.72
9.63729	5689.31	231.484	2125.31	14219.1	459.812	1076.25	1111.69	-516.469	595.375	6651.62	3527.25	-450.25	3371.19	11179.4	-35.25	1635.75	3963.22
9.63709	5815.69	708.344	2889.56	14585.3	604.219	1829.12	1042.81	-639.875	704	6848.06	4354.09	1360.5	4086.25	10640.4	726.875	1157.19	3833.81
9.63689	6017.81	1137.39	4097.81	13839.4	750.625	1711.25	257.875	-553.781	604.375	6204.75	5311.41	3574.06	4658.38	10011.5	1921.25	533.188	3711.56
9.6367	6343.94	1314.42	4680.94	12491	813.156	550.25	-1358.94	-250.781	-208.625	4726.62	5928.5	4296.69	4721.62	9536.62	2673.25	472.062	3613.44
9.6365	6711.12	1329.41	4593.06	11723.2	1016.31	-416.688	-2960.19	256.406	-1150.62	3325.12	5968.31	3309.94	4192.12	9300.5	2119.75	1201.06	3401.53
9.6363	6841.19	1435.58	4654.31	11739.6	1491.78	-131.25	-3542.88	992.406	-1026	2600.25	5653.59	2173.69	3494.31	9200.5	901.5	2071.38	2986.03
9.6361	6403.75	1754.95	5234.56	11429.5	2005.66	1028.75	-2860.44	1982.09	198.875	2457.31	5351.78	2070.44	3303.25	9118.31	595.25	2581.44	2563.5
9.6359	5441.88	2195.27	5850.12	9946.12	2260.34	1946.06	-1426.19	3066.56	1236.5	2715.44	5092.94	2559.94	3877.88	9030.03	1430	3035.5	2473.47
9.6357	4408.25	2531	5969.12	8029.56	2292.41	2177	-2	3864.66	1425.12	3379.38	4611.47	2664	4833.56	8971.97	1995.38	3684.19	2823.81
9.6355	3552.44	2479.89	5580.19	7225.56	2352.31	2153.56	777.312	4077.56	1682.62	4308	3843.31	2280.06	5691.81	8994.69	1660.88	4022.06	3379.81
9.63531	2641.25	1876.02	4970	8036.5	2511.38	2261.5	775.375	3781.06	2862.38	5130.12	3129.78	2073.75	6377.06	9135.81	1630.38	3722	3835.16
9.63511	1629.75	940.766	4435.19	9411.38	2632.84	2330.62	688.75	3267.16	4185.25	5573	2854.31	2532.19	6983.5	9360.75	2664.62	3589.62	4088.66
9.63491	1125.31	263.359	4214.75	10085.6	2664.78	2135.94	1526.5	2667.75	4306.62	5611.75	3056.97	3526.94	7366.25	9558.5	3403.12	4564.25	4225.06
9.63471	1615.88	320.172	4300.81	9897.25	2721.94	1935	3241.31	1939.09	3253.62	5340.5	3468.12	4515.56	7306.31	9659.81	2486.38	6152.44	4332.31
9.63451	2670	1043.22	4346.31	9492	2895.62	2145.88	4280.44	1178.75	2214.38	4902.62	3756.09	4983.06	6905.94	9708.16	1086.75	6930.44	4434.53
9.63431	3621.12	1943.77	4075	9157.25	3179.44	2715	3212.69	686.906	1823.12	4446.5	3692.78	4913.12	6465.69	9756.66	1401.5	6482.62	4560.47
9.63411	4619.44	2547.33	3637.44	8572.38	3546.59	3261.19	615.438	621.25	1778.38	3980.75	3269.72	4813.5	6012.69	9777.91	3324.62	5805.19	4753.09
9.63391	6062	2624.25	3260.69	7680.94	3899.81	3764.69	-1438.94	781.375	1984.38	3438.69	2745.97	4985.19	5241.06	9752.28	4633.12	5706.94	4968.5
9.63372	7287.38	2217.62	2862.69	7134.81	4002.69	4497.62	-1762.25	840.625	2824.75	2993.56	2429.28	4949.5	3972.44	9736.72	4295	5795.19	5041.88
9.63352	7041.94	1687.19	2485.56	7466.44	3718.16	5132.62	-1085.94	648.656	4054.5	2997.12	2334.81	4107.88	2517.31	9741.03	3619.75	5336.25	4846.31
9.63332	5285.56	1581.92	2714.56	8223.38	3296.53	4727.44	-558.562	223.156	4521.12	3392.81	2219.34	2801.31	1514.94	9652.06	3840.25	4282.06	4486.34
9.63312	3379.5	2158.16	3906.81	8504	3150.84	3181.75	-164.062	-386.625	3631.75	3544.88	2013.47	2008.19	1437.06	9416.41	4362	3034.5	4270.47
9.63292	2292.44	3030.28	5215.19	8249.62	3324.94	1987.75	749.188	-1079.88	2365.25	2967.56	2002.38	1977.56	2225.75	9188.06	4181.12	1882.19	4453.75
9.63272	1779.25	3524.72	5296.31	8451.12	3465.22	2546.5	2095.88	-1657	2043.62	1915.69	2455.38	1923.75	3417.31	9143.22	3631.88	1139.19	5016.97
9.63252	1641.19	3375.41	4075.69	9934	3364.22	4160.44	3140.94	-1951.94	2535.12	942.125	3283.12	1269.19	4621.81	9252.78	3689.25	1253.81	5704.06
9.63233	2446.5	2884.41	2972.25	12315	3222.41	4859.88	3671.25	-1979.41	2550	266.812	4214.53	464.812	5742.62	9395.88	4384.5	2215.38	6258.16
9.63213	4236.19	2450.62	3141.75	14349.2	3262.47	4030.5	4159.56	-1860.28	1603.88	5.9375	5093.97	233.875	6643.56	9564.62	4883.25	3240.62	6612.25
9.63193	5653.19	2201.34	4251.06	15098.7	3383.28	2884.94	4708.12	-1645.28	736.375	556.625	5784.53	617.875	6933.56	9745.94	4666.75	3585.75	6863.44
9.63173	5446.75	2092.95	5307.81	14654.3	3362.44	2268.12	4645.38	-1288.78	949.25	2008.5	5989.59	1218.94	6501.94	9738.81	3903.62	3411.81	7083.5
9.63153	4157.38	2086.48	5926.12	13913.5	3138.81	1560.56	3514	-750.281	1724.25	3422.06	5504.72	1908.5	6043.56	9386.28	2979.38	3380.31	7189.44
9.63133	3323.75	2105.55	6225.12	13752.8	2709	312.125	1898.62	-51.7812	1814.88	3588.38	4579.44	2787.81	6390.44	8934.41	2255.75	3604.44	7044.69
9.63113	3534.5	2018.62	6107.62	14289.3	2000.94	-580.938	810.125	729.781	1076.88	2601	3731.06	3704.62	7293	8851.56	2040.62	3515.38	6685.5
9.63094	4185.5	1794.52	5439.44	14929.1	1092.47	-387.125	552.625	1488.72	592.875	1874.62	3199.84	4223.81	7581.62	9268.94	2309.12	2731	6358.41
9.63074	4711.56	1556.53	4700.12	15174.8	349.906	22	652.375	2156.81	1008.88	2319.06	2822.53	4016	6770.25	9856.72	2581.62	1634.88	6260.47
9.63054	5067.19	1401.42	4690.06	15151.9	94.4375	-412.062	742.875	2758.5	1691.5	3215.06	2419	3167.69	5764.5	10268.4	2382.38	965.812	6290.38
9.63034	5200	1281.86	5447.25	15117.4	292.656	-1015.06	1000.44	3320.81	1846.5	3361	2035.12	2283.12	5512.19	10438.5	1669.38	1015.5	6154.62
9.63014	4927.19	1138.14	5914.75	14859.9	803.219	-420	1582.31	3721.09	1615.25	2714.31	1781.53	2215.25	5630.88	10421.5	677.625	1320.94	5704.16
9.62994	4313.38	1034.75	4969.19	14162.8	1703.22	1072.12	2067.25	3754.94	1455.12	2213.31	1694.75	3245	5122.69	10259.5	-342.75	1134.5	5070.22
9.62974	3603.12	1091.06	2691.06	13549.2	3016.88	1864.81	1871.75	3398.19	1154.5	2354.44	1813.31	4497.19	4019.06	10113.3	-1058	227.812	4475.84
9.62954	2927.06	1361.86	512	13691.9	4271.47	1616.62	1137.5	2857.97	316.875	2772.12	2138.78	4737.56	3440.44	10224.3	-1099.75	0	4034.66
9.62935	2485.69	1832.03	90.3125	14154.1	4774	1734.38	762.875	2298.41	-657.125	3175.44	2445.28	3891.62	4105.62	10576.2	-467.25	0	3758.97
9.62915	2610.88	2438.23	1982.81	13785.1	4379.06	3068.44	1330.25	1684.31	-1012.75	3860.38	2396.25	3153.75	5511.75	10830.5	403	0	3621.72
9.62895	3117.38	3050.58	5282.19	12611.2	3637.72	4637.81	2285.88	1008.66	-765.5	4961.5	1997.25	3333.81	6657.5	10776.3	1153.88	0	3510.5
9.62875	3142.69	3512.88	8373.62	12174.8	3097.94	5244.19	2550.06	486.062	-408	5801.25	1706.75	3783.75	7002.94	10637.9	1772	0	3216.25
9.62855	2369.56	3731.09	9943.38	13335.1	2769.38	5114.69	1807.81	307.219	264.125	5562.56	1919.5	3423.12	6627	10745.3	2173.5	885.938	2613.97
9.62835	1876.5	3661.14	9507.44	14776.2	2424.25	5125.19	749	309	1842.25	4394	2522.16	2233.06	5950.75	11081.5	1980	2241.44	1866.19
9.62815	2854.62	3251.58	7551	14715.9	2133.47	5324.06	36.625	127.656	3838.12	3341.19	3137.25	1120.12	5458.44	11379.3	1054	2831.31	1374
9.62796	4887	2547.81	5407.5	13302.3	2222.75	5179.06	-413.938	-340.406	4863.62	3188.81	3616.59	698.562	5314.56	11547.1	-72.5	2011.88	1493.88
9.62776	6474.94	1847.47	4506.56	12076.8	2787.91	4718.38	-905.938	-823.531	4641.88	3734.5	4048.75	800	5183	11772.7	-663.25	389.875	2290.31
9.62756	6912.5	1554.2	5183.38	11571.5	3487.69	4480.56	-1260.38	-1022.47	4581.5	4237.81	4413.44	927.562	4775.06	12244.9	-474.625	0	3511.47
9.62736	6597.19	1783.95	6379.62	10901.4	3866.47	4546.5	-1136.5	-906	5689.75	4240.25	4518.66	710.875	4543.81	12912.2	211.25	0	4763.16
9.62716	5874.75	2231.36	6867.31	9665.88	3803.38	4410.5	-704.625	-645.906	7026.88	3824.06	4266.38	175.188	5315.19	13466.8	940.25	0	5727.16
9.62696	4912.25	2493.47	6468.62	8771.19	3614.72	3826.5	-409.562	-403.406	7103.88	3369.38	3763.78	-32.0625	7103.12	13494.7	1277.88	0	6251.91
9.62676	4555.38	2420.78	5661.25	8913.19	3729.22	3200.38	-226.688	-206.938	5929.75	3264.69	3181.69	953.5	8774.69	12783.7	1065	0	6268.97
9.62657	5783.38	2114.69	4511.12	9403.31	4270.09	2997.38	220.625	72.5938	4701.62	3652.38	2695.12	3114.06	9154.38	11625.8	784.25	770.625	5726.56
9.62637	8017.44	1732.36	2854.12	9203.44	4977.38	3148.44	807.562	626.906	4183.62	4229.88	2538.34	5243	8161.06	10683.2	1220.38	1706.5	4728.78
9.62617	9290.81	1398.05	1258.94	8375.38	5533.78	3269.5	816.75	1472.44	4388	4421.31	2880.06	6259.19	6703.06	10369.5	2372	1799.5	3696.72
9.62597	8541.94	1206.66	737	7843.62	5873.78	3270.81	-68.5	2317.31	5226.5	3959.06	3581.5	6400.12	5776.19	10447.8	3167.62	1522.06	3177.78
9.62577	6619.44	1209.81	1393.94	8228.5	6117.22	3440.31	-1168.94	2801.97	6352	3225.12	4251	6506.31	5795.19	10399.7	2798.5	1524	3369.62
9.62557	4704.25	1420.45	2300.56	9465	6327.12	3840.56	-1533.19	2874.47	6791.5	2846.44	4599.44	6640.19	6405.38	10067.7	1871.38	1814.75	3925.28
9.62537	3089.12	1826.58	2879.31	11128.1	6482.06	3882.62	-968.375	2791.66	5899.75	3011.56	4610.53	6299	6703.56	9713.22	1538.75	1941.12	4325.53
9.62517	2065.75	2311.8	3475.38	12590.8	6596.44	2897.94	-111.25	2763.78	4453.38	3336.81	4354.84	5611.75	5974.88	9538.09	1886.12	1700.75	4369
9.62498	2475.75	2603.98	4295.25	13178.9	6669.25	1158.38	251.875	2777.28	3780.88	3350.31	3839.81	5211.62	4487.12	9453.97	2108	1367.94	4222
9.62478	4246.44	2497.91	4868.06	12698.8	6544.34	-136.938	-283.625	2781.59	4048.25	2972.06	3123.56	5004.75	3303.31	9365.22	2099.62	1290.56	4094.06
9.62458	5576.94	2166.61	5104.69	11676.2	6042.16	-158.375	-1568.62	2827.06	4454.12	2579.88	2395.81	4206.56	3101.5	9401.47	2731.75	1460.06	4000.03
9.62438	5002	2051.38	5823.38	10787.8	5263.38	674.188	-2917.44	2922.78	4827.75	2692.62	1820.5	2776.19	3500.06	9710.22	4308.62	1537.94	3804.22
9.62418	3517.69	2352.59	7334.38	10270.3	4580.25	1461.44	-3493.5	2949.88	5700.5	3450.81	1416.72	1733.25	3789.31	10166.6	5795.62	1300.44	3395.06
9.62398	3241.31	2811.52	8364	10060.2	4277.97	2014.38	-3027.94	2857.19	6796.88	4281.81	1181.22	1657	3913.31	10467.6	6157.88	985.688	2828.28
9.62378	4452.81	3089.84	7549	10131.1	4358.38	2677.12	-2103.62	2797.06	6862.38	4281.25	1173.12	1844.75	4287	10476.1	5688.88	1002.62	2341.59
9.62359	5420.31	3156.3	5524	10409.9	4702.59	3307.31	-1532.62	2918.41	5403.75	3173.75	1345.78	1521.06	4961.44	10352.6	5314.88	1256.81	2167.19
9.62339	4965.06	3144.92	4339.38	10750.9	5199.47	3249.19	-1560.94	3151.75	3461.62	1748	1438.94	1036.94	5555.12	10324.6	5170.88	1104.56	2297.12
9.62319	3749.56	3042.7	4966.12	11284.5	5636.06	2300.44	-1836.88	3368.66	2160.88	1076.69	1228.03	1158.5	5898	10408.8	4691	227.875	2533.97
9.62299	2857.56	2762.52	6442.44	12351.2	5718.66	1008.56	-1937.44	3638.28	1481.12	1439.31	817.062	1831.38	6172.62	10422.4	3764	0	2810.5
9.62279	2381.75	2407.66	7463.88	13717.4	5396.34	-64.625	-1667.94	4096.53	970.125	2288.62	526.281	2440.25	6400	10255.1	2938.38	0	3297.12
9.62259	1905.19	2214.64	7711.19	14365.2	5001.41	-757.562	-1044.94	4600.38	702.875	3069.75	536.812	2827.62	6342.12	10040.1	2554.62	0	4094.78
9.62239	1447.25	2273.7	7353.94	13625.8	4859.69	-934.625	-311.688	4757.78	822.125	3615.44	781.906	3247.38	6070.31	9979.31	2409.62	578.562	5003.66
9.6222	1339.75	2494.36	6305.56	12130.8	4873.38	-375.75	160	4367.12	888.5	3857.62	1120.25	3607.56	6122.69	10046.2	2338.88	1593.75	5753.28
9.622	1701.94	2795.27	4644.06	11018.4	4707.66	758.625	292.125	3660.31	463.875	3763.75	1439.31	3561.94	6797.44	9996.31	2494.5	2898.44	6278.5
9.6218	2442.19	3130.97	3134.5	10544.6	4316.53	1903.19	486	3025.97	-160.375	3694.38	1626.41	3231.19	7648.5	9711.84	2917.25	4456.31	6560.72
9.6216	3373.88	3373.28	2572.38	10212.2	4025.72	2723.44	1053.5	2625.09	-429.375	4278.94	1638.19	3132.19	8000	9407.06	3338.62	5734.44	6399.62
9.6214	4094.88	3387.61	2837	9983.94	4065.25	3295	1615.75	2377.66	-271.25	5614	1619.56	3408.69	7658.19	9397.06	3541.88	6373.62	5686.06
9.6212	4168.19	3248.19	3174.62	10399.9	4243	3553.31	1486.62	2208.34	128.5	6927.06	1779.06	3697	6758.5	9731.53	3491.25	6557.88	4805.56
9.621	3640.38	3200.48	3300.94	11444	4194.94	3171.19	562.688	2146.62	796.25	7323	2106.06	3713.56	5210.69	10155.6	3078.25	6511.12	4373.22
9.6208	3042.44	3379.5	3646.62	12227.4	3832.34	2203.75	-599.25	2211.47	1667.25	6623.25	2369.53	3434.38	2876.06	10392.7	2259.25	6132.62	4519.25
9.62061	2796.25	3698.39	4406.88	12126.5	3418.72	1302.19	-1490.75	2334.22	2297.75	5299.19	2450.75	2766.81	271.438	10377	1466.12	5381.06	4763.78
9.62041	3000.62	4009.36	4874.06	11501.6	3262.06	1030.25	-1915.94	2428.25	2440.12	3941.62	2519.88	1662.62	-1475.75	10226.6	1226.75	4513.31	4685
9.62021	3755.81	4209.61	4154.88	10907.9	3426.09	1426.62	-1641.38	2448.84	2486.5	3083.38	2798.5	573.188	-1657.88	10077.8	1229.25	3617.94	4407.16
9.62001	5082.31	4188.33	2386.69	10314.4	3727.22	2347.75	-512.75	2357.22	2835.62	3184.12	3283.25	178.312	-702.875	9982.12	528.875	2407.81	4299.31
9.61981	6399.38	3868.27	773	9681.38	3937.75	3596.5	931.562	2114.91	3287.75	4303.25	3808.5	568.562	371.875	9941.09	-964	907.25	4481.34
9.61961	6748.12	3361.61	304.688	9678.19	3976.34	4528	1721.44	1776.28	3579.62	5869.62	4265.41	1265.88	1039.5	9992.16	-1974.88	0	4814.75
9.61941	5867.62	2913.33	837.875	10927.4	3939.25	4330.5	1695.56	1509.16	3936.12	7083.62	4624	2105.62	1580.62	10187.5	-1459.38	52.5625	5151.66
9.61922	4586.88	2600.45	1672.75	12752.9	3977.69	3149.5	1798.88	1416.81	4430.25	7490.31	4807.78	3359.5	2455.44	10450.6	-94	990.438	5375.5
9.61902	3867.31	2235.91	2588.56	13597.5	4157	2226.19	2642.31	1376.59	4397.75	7014.25	4695.16	4764.56	3628.81	10548.8	584.25	1676.75	5356.03
9.61882	3874.56	1684.45	3728.06	12884.6	4441.22	2362.94	3440.62	1198.06	3394.5	5726	4264.91	5292.88	4590.62	10336.1	95.5	1810.44	5079.5
9.61862	4209.69	1161.33	4724.56	11804	4794.84	2916.25	3115.94	960.969	2305.62	3948.44	3676.28	4480.75	4971.44	9975.34	-752	2083.56	4725.22
9.61842	4566.5	1072.17	4819.38	11873.5	5242.91	3008.56	1909	1028.72	2450	2384.75	3184.03	3322.69	5065	9759.09	-1231.88	3001.94	4441.88
9.61822	4879.19	1590.81	4043	13133.6	5782.03	3115.94	953	1601	3741.5	1661.88	2951.19	3033.75	5611	9744.5	-1374.25	4031.06	4138.41
9.61802	5266.62	2478.55	3478.19	14192.2	6256.09	4450	568	2366.16	4725.38	1753.5	2886.97	3356	6925.88	9760.59	-1361	4258.69	3644.28
9.61783	6082.38	3287.84	3824.75	13850.8	6408.69	7006.75	65.1875	2782.31	4444	2194.19	2690.97	3034.31	8369.06	9765.06	-1172.88	3587.38	2994.25
9.61763	7510.75	3680.59	4292.31	12247.1	6120.88	9242.44	-783.438	2680.03	3354.25	2793.88	2179.53	1806.19	8962.44	9922.66	-992.5	2874.44	2414.66
9.61743	8841.88	3601.89	3655.06	10421.4	5567.06	9839.81	-1222.62	2406.16	2325.5	3715.88	1585.84	867.438	8511.19	10249.8	-1179.38	2939.06	2089.19
9.61723	8779.69	3247.58	2121.81	9168.38	5071.19	9053.69	-802	2349.91	1652.5	4848.06	1385.75	1119.69	7731.19	10459.5	-1580	3688.69	2044.38
9.61703	6975.19	2890.48	1346.12	8562.12	4826.62	8039.06	-213.375	2514.44	1293.25	5586.88	1777.06	1866.38	7223.88	10333.3	-1484.25	4285.44	2183.06
9.61683	4745.81	2704.36	2476.75	8397.88	4822.38	7429.75	-238.812	2645.66	1268	5455.75	2509.59	1804.44	6848.06	10031.6	-536.5	4042.06	2335.22
9.61663	3725.19	2724.94	4793.75	8680.88	4997.38	7015.12	-569.188	2604.59	1457.88	4638.5	3308.47	672.938	6358.12	9834.31	853.5	3061.19	2372.41
9.61643	4207.75	2918.42	6555.06	9468.06	5301.12	6509.5	-366.688	2432.78	1642.38	3729	4217.03	-777.25	6074.06	9769.5	2205.38	2034.44	2363.75
9.61624	5327.56	3196.03	6844	10415.8	5565.84	6081.5	446.688	2145.06	2001.62	3213.94	5302.78	-2037.94	6354.94	9736.75	3474	1520.25	2509.94
9.61604	6337.75	3361.41	6258.44	10898.2	5527.44	5950	1130.06	1678.69	2914.88	3326.38	6242.59	-3230.75	6816.38	9825.94	4560.12	1477.75	2831.53
9.61584	6991.31	3174.12	5939.56	10720.7	5163.78	5775.75	1090.31	1074.38	3998.38	4051.12	6564.94	-4308.19	6804.62	10222.1	4921.62	1464.5	3060.69
9.61564	7083.94	2570	6321.75	10405.8	4887.88	4969.75	363	547.781	4168.75	4987.12	6257.62	-4678.69	6452.81	10872.6	4194.25	1195.44	2954.88
9.61544	6528.94	1777.22	7018.44	10450.8	5141.34	3750.25	-642.5	296.875	3202.12	5446.25	5799.47	-3941.25	6483.56	11515.2	2877	855.25	2574.03
9.61524	5777.62	1130.05	7671.19	10532.4	5787.12	3337.19	-1367.12	308.844	2475.25	5054.38	5560.62	-2508	6969.75	11987.7	1972.88	848.438	2135.53
9.61504	5418.12	778.094	8366.81	9963.38	6147.62	4493	-1272.75	409.406	3320.12	4198.62	5486.94	-1150.5	7091.06	12272.2	2083.5	1258.44	1780.62
9.61485	5437.69	622.156	9029.88	8894.62	5744.16	6214	-336.812	448.062	5101.25	3637.25	5443.91	-264.625	6319.38	12289	3053	1676.94	1651
9.61465	5537.75	497.375	9005.62	8406.06	4827.06	6747.69	695.75	393.844	5877.88	3733	5510.41	94.5625	5138.81	11925.3	4252	1738.88	1988.88
9.61445	5988.06	341.281	7928.25	9103.06	4050.91	5836.69	976.688	300.531	4857.62	4277.88	5717.72	-180.125	4275.56	11292.3	5033.5	1737.94	2883.06
9.61425	7308.44	196.656	6690.94	10203.6	3764.44	4912.81	406.375	238.438	3260.75	4955.06	5781.62	-1028.62	3832.44	10730.3	5154.12	2340.06	4023.34
9.61405	9116.62	131.547	6603.75	10571.6	3780.09	4867.56	-464.5	249.469	2527.75	5635.81	5411.62	-1722.88	3573.88	10517.7	4894.25	3578.75	4965.78
9.61385	10188.4	178.641	7522.44	10254.8	3766.41	4828.12	-1122.56	335.156	2471.5	6190.44	4770.25	-1272.62	3507.38	10732.2	4590.75	4578	5563.38
9.61365	9861.5	297.656	7806.94	10246.3	3682.72	3780.75	-1260.81	492.688	1823.75	6324.56	4356.66	356.875	3689.19	11353.5	4154.75	4606.56	5899.25
9.61346	8672.94	378.344	6524.81	10863	3787.5	2289.75	-599	764.875	256.625	5792.75	4473.44	1863.12	3854.31	12268.4	3441.5	4006.31	5909.53
9.61326	7464.06	329.891	4752.06	11193.4	4293.12	1575.69	769.625	1208.41	-906.25	4670	4997.72	1899.56	3712.75	13167.5	2882.25	3569.38	5414.88
9.61306	6602.94	192.891	4018.38	10382.2	5045.31	1708	1956.19	1757.31	-223.5	3332.25	5606.56	586.062	3334.56	13688.3	3005.62	3350.06	4521.25
9.61286	6244.06	115.281	4272.69	8819.44	5555	1926.31	1941.56	2137.44	2047.5	2255.69	6013.03	-685.5	2914.56	13742.7	3371.25	2829	3663.44
9.61266	6495.62	185.062	4314.88	7679.19	5415.38	2192.81	814.938	2012.53	4153.38	1817.94	6031.88	-865	2515.88	13531.1	2964.25	2078.75	3165.59
9.61246	6979.88	331.797	3696.94	7689.94	4729	3065.81	-223.812	1305.16	4789.25	2078.56	5671.59	-178.188	2373.56	13205.8	1890.75	1857.25	2987.06
9.61226	7001.5	434.234	3141.94	8675.38	4054.94	4227.94	-272.375	362.75	4307.62	2666.94	5208.66	592.875	2988.62	12720.9	1606	2417.25	2948.84
9.61206	6561.62	473.656	3287.31	9947.38	3878	4463.12	347.188	-288.531	3760.5	3092.06	4975.69	1154.06	4462.69	12076.8	2853.75	3111.25	2964.66
9.61187	6474.69	512.391	3956.62	10815.9	4200.72	3255.94	728.812	-414.188	3306.88	3291	5011.28	1634.25	6130.94	11500.7	4376.5	3528.62	2981.44
9.61167	7053.94	571.375	4647.12	10982.8	4703.31	1423	472.312	-253.281	2305	3681.38	5062.34	1947.12	7295.88	11258.6	4544.25	4201.06	2940.47
9.61147	7481.44	640.656	4968.25	10724.9	5165.56	21.875	-88.9375	-185.531	779.125	4511.44	4958.84	1888.38	7886.06	11391.1	3448.88	5600.69	2905
9.61127	7084.88	799.844	4625.56	10522.4	5565.31	-518.125	-372.25	-279.562	-165.125	5383.62	4805.25	1739.31	7950.56	11695.1	2331.5	7100.44	3011.69
9.61107	6483.94	1190.41	3682.81	10431.7	5838	-190.312	-78.9375	-268.125	222.75	5694.31	4730.81	2084.94	7145.88	11879.3	1597.75	7649.94	3187.78
9.61087	6687.25	1823.45	2818.19	10218.4	5780.59	685.875	443.312	76.5	1181.38	5382.44	4634.12	2897.69	5490.31	11755.3	686.625	7078.31	3141.16
9.61067	7626.56	2544.47	2651	10150.3	5288.16	1283.81	361.5	684.312	1362	4908.56	4329.56	3430.81	4075.75	11427.9	-420.375	6076.56	2778.94
9.61048	8410.56	3264.08	2868.25	10946.2	4560.88	975.938	-632.875	1294.31	553.125	4593.5	3853.72	3338.38	4001.38	11285.7	-916.5	5227.38	2432.97
9.61028	8574.69	4083.94	2715	12548.8	3968.94	345	-1477.19	1644.84	-174.125	4383.06	3481.16	3333.25	4869.25	11609.8	-462.875	4680.94	2467.19
9.61008	8242	5047.23	2254.75	13682	3744.97	517.938	-663.312	1517.09	82	4252.56	3450.06	4188.31	5349.81	12183.6	359.875	4462.94	2797.16
9.60988	7432.75	5869.59	2311.62	13337.6	3850.25	1420.5	1702.5	812.969	1066.88	4363.25	3747.62	5470.62	5060.38	12503.5	1092.25	4388.88	2997.44
9.60968	6131.75	6131.56	3143.81	12182.5	4082.31	1845.19	3572.38	-229.312	1870	4660	4140.75	5984.19	4798.44	12395.6	1889.5	3899.06	2805.75
9.60948	4819.44	5742.23	4056.62	11663.6	4251.66	1415.06	3300.94	-1029.97	1905.25	4745.69	4358.78	5371.44	4991.44	12173	2702.38	2719.56	2344.47
9.60928	4057.25	5056.39	4488	12084.2	4294.94	1119.88	1682.06	-1117.72	1250.38	4439	4269.88	4551.69	5150.44	12116.4	2919.62	1566	1889.62
9.60909	3659.44	4513.3	4610.88	12492.8	4299.72	1471.38	852	-595.875	432	4111.12	3931.94	4404.62	5023.38	12089.1	2321.12	1432.12	1591.06
9.60889	3053.25	4278.09	4604.75	12261.8	4427.34	1609.12	1611.88	-21.5938	100.5	4135.31	3488.47	4630.75	5024.44	11821.9	1688	2190	1431.19
9.60869	2315.5	4209.39	4205.5	11749.2	4749.5	1040	2801.94	168.281	613.375	4300.44	3042.09	4261.75	5146.12	11333.4	1944.75	2657.56	1346.62
9.60849	2031.5	4004.83	3415.31	11337.9	5120.56	814.938	3156.12	-10.5	1667.75	4184.06	2669.22	2854.56	4745.81	10846.6	3166.25	2197.81	1345.91
9.60829	2260.81	3382.5	2903.25	10828.4	5242.72	1764.62	2716.88	-283.938	2478.5	3897.81	2496.44	759.938	4043.06	10458.9	4796.62	1532.88	1515.72
9.60809	2540.69	2330.05	3169.56	10134.7	4921.44	2793.38	2191.5	-452.75	2492.5	4002.25	2630.25	-1431.06	4505.44	10124	6343.12	1652.56	1890
9.60789	2842.38	1228.11	3879.38	9818.31	4286.34	2456.94	1823.62	-497.875	1821.62	4771.25	2999.19	-3131.44	6710.69	9851.88	7406.62	2479.75	2337.5
9.60769	3530.44	528.969	4467.38	10454.8	3726.25	1333.12	1453.19	-510.969	894.125	5937.38	3394.53	-3627.31	8915.94	9714.16	7456.88	3068.19	2685.06
9.6075	4328.12	250.781	4832.75	11890.2	3562.91	1087.81	1130.5	-594.188	-68.875	7044.44	3701.53	-2455.62	9067.19	9699.38	6183.25	2840.69	2968.81
9.6073	4429.75	2.59375	5001.19	13413	3794.22	1726	1057.38	-744.188	-987.75	7593.31	3963.69	-221.5	7446.75	9726.78	4019.38	2230.81	3426.28
9.6071	3922.12	-416.172	4735.25	14343.5	4175.19	1655.88	1168.69	-806.25	-1534.75	6994.81	4188.66	1456.38	5908.56	9761.84	1995.38	2107.25	4176
9.6069	3988.75	-719.938	4064.25	14410.4	4507.94	413	1244.62	-625.312	-1238.38	5101.56	4263.34	1398.06	5139.69	9791	1021.12	2725.62	5032.78
9.6067	5153.06	-609.688	3671.56	13989	4792.28	-515.875	1297	-237.906	-65	2927.88	4148.72	226.438	4437.88	9740.84	1344.12	3370.62	5731.12
9.6065	6300.56	-269.219	4095	13949.9	5131.84	28.25	1465.81	191.812	1407.62	2085.06	3987.03	-150.438	3953.44	9552.41	2528.12	3224.31	6210.19
9.6063	6208.75	-118.734	4927.19	14726.2	5601.62	1348.38	1656.75	597.312	2610.12	3014.5	3883.06	1424.94	5048.5	9302.97	3843.5	2546.44	6559.19
9.60611	5259.06	-272.359	5403.69	15601	6203.72	2272.81	1666.19	1013.56	3566.25	4300.12	3752.03	4137.62	7795.38	9160.34	4762.12	2456.31	6789.38
9.60591	4705.94	-553.922	5410.06	15597.5	6825	2758.88	1618.88	1358.34	4582	4322.31	3570.03	6214.62	9872.69	9263.72	5140.25	3235.81	6813.47
9.60571	4789.62	-902.047	5295.31	14973.8	7202.5	3309	1896.62	1408.22	5489.75	3222.06	3607.78	6857.06	9172.88	9702.94	4999.62	3545.5	6603.22
9.60551	4610	-1384.61	5086.88	14875.5	7079.25	3806.69	2569.81	1054.69	5653.75	2494.62	4131	6719.94	6440.56	10488	4396.62	2145.56	6225.28
9.60531	3678.88	-1857.36	4657.56	15461.8	6497.12	3805.94	3215.62	431.594	4871.5	2819.69	4938.34	6603.62	4137.44	11408	3625.12	0	5729.34
9.60511	2625.81	-1979.67	4416.88	15559.2	5825.59	3268.56	3426.94	-242.156	3854.25	3210.81	5503.5	6351.5	3509	12032.7	3145.75	0	5112.84
9.60491	2233.12	-1628.05	4983.75	14564	5374.31	2294.31	3251.69	-760.312	3422.25	2582.12	5592.91	5396.56	4035.69	12055.1	2987.75	0	4414.16
9.60472	2502.25	-1012.14	6167.62	13474.1	5068.12	795.75	2955.25	-851.031	3441.75	1367.31	5458.5	3899.69	5118.19	11630	2588	1164.88	3781
9.60452	2942.5	-350	7018.56	13322.1	4650.19	-846.625	2542.19	-300.531	3075.88	906.688	5358.69	2689.69	6674.19	11242.4	1649.75	1360.12	3424.75
9.60432	3274.5	275.359	7026.06	13677.7	4114.03	-1495.44	1763.12	679.969	2090	1633.75	5196.66	2171.81	8130.5	11233.7	737.375	1120	3494.69
9.60412	3519.25	703.141	6653.5	13665.3	3714.03	-501.875	562.062	1453.41	1348.12	2687.06	4796.94	1919.88	8408.06	11541.5	456.5	1682.25	3939.56
9.60392	3697.62	706.906	6497.56	13503.4	3554.84	1215.56	-672.375	1550.03	1728.5	3316.56	4279.56	1503.06	7429	11869.2	495.625	2860.69	4483.09
9.60372	3785.19	381.094	6480.81	13825.9	3408.25	2170.12	-1382.88	1114.44	2936.12	3887.19	3910.06	1214.88	6493.56	12000.7	261.25	3432	4819.84
9.60352	3865.06	210.156	6189.31	14169	3038.5	2055.88	-1363.94	604.188	3840	5096.38	3727	1632.31	6539.31	11945.4	51.25	2939.19	4870.94
9.60332	4054.44	533.391	5613.62	13526.4	2543.66	1778.56	-1012.5	269.156	3828	6765.06	3565.53	2718.06	6965.69	11871.1	585.5	2040.25	4782.19
[truncated: 45,925 more rows]

## Sheet: Sheet 2-Data_AqExt
Group	Controls	Controls	Controls	Controls	Controls	Controls	PLLA0	PLLA0	PLLA0	PLLA0	PLLA0	PLLA0	PLLA-	PLLA-	PLLA-	PLLA-	PLLA-	PLLA-
Sample ID	EA_HobS300514_1_1	EA_HobS071114_1_1	EA_HobS220415_1_1	EA_HobS020614_1_1	EA_HobS101114_1_1	EA_HobS250415_1_1	EA_HobN300514_1_1	EA_HobN071114_1_1	EA_HobN220415_1_1	EA_HobN020614_1_1	EA_HobN101114_1_1	EA_HobN250415_1_1	EA_HobP300514_1_1	EA_HobP071114_1_1	EA_HobP220415_1_1	EA_HobP020614_1_1	EA_HobP101114b_1_1	EA_HobP250415_1_1
10	-8861	-16513	13032.8	5478	7928.5	16777.2	-17911	12367	9058.5	9288	11374	6060.5	3234.5	21994.5	-1964.75	13896	-15364.5	18827.5
9.99979	-25029	-17123.5	6425.25	9463	7546	6787.75	-18026	20344.5	9066	9432	10684	7709	7023.5	13036.5	-2347.5	27867.5	-5343	11542.5
9.99957	-27270	-20096.5	3966.75	11780	6521.5	960.25	-17424	29252	12052	10832	6292	8381.5	14766	4555	1232	35043.5	248	7707
9.99936	-18929	-24004.5	8907.5	16000	3375.5	2432	-17525	37269	15949	5825	3020	8396	23560.5	4270	220.75	34067	-1718.5	10458.5
9.99915	-14453	-24180	17308.2	20094	-3114.5	6779.75	-16145	41880.5	21453.5	-7681	1594	12140.8	25599.5	11515.5	-7463.25	30864	-2839	14527.5
9.99893	-15210	-18321.5	20067.2	19530.5	-6936.5	7708.75	-13664	43701	27691	-20282	-1255	18216	17818	21069	-14391.2	29502.5	1230	14410
9.99872	-10355	-8142	15602.2	14661.5	-876	4188.25	-13555	45380.5	30574	-22391	-6430	20306.5	9774	29446	-12455.8	28454	4146.5	12125
9.9985	1693	1514	12647.2	9515.5	11686.5	84	-14784	44534.5	29008	-15486	-10403	17824.5	12791	34856.5	-1649.75	25932	736.5	12629
9.99829	10108	5426.5	15891.8	5921.5	19406.5	-1697.75	-11379	35665.5	27913.5	-7057	-10696	17155.5	22885	35489.5	10347.8	23287	-5053.5	14906.5
9.99808	9520	3068.5	17523	3432.5	16911	-1867.5	-3010	21728	30690.5	-269	-9793	21212.8	25282.5	31268.5	15567.2	21507.5	-8252	13184
9.99786	5869	134.5	10029.2	2410	8852.5	-1892	1840	14219.5	32732	5303	-11021	25548.8	16161	25518.5	12911	19142.5	-9614.5	5759.5
9.99765	4143	1752	0	2870	1206	-1346.75	-2066	17593.5	27718.5	8237	-13133	26535.8	7994	22977.5	9502.25	15742	-9935.5	-2512
9.99744	3162	5814.5	0	2902.5	-3760.5	670.75	-9005	23346	17265.5	7861	-12184	25975.5	10347.5	26468	14507.2	13470.5	-6512	-6598
9.99722	2337	7042.5	7367.75	2111.5	-4618	3173	-11789	24512	8447.5	8062	-7351	25371	17170	34973.5	29990.8	13692.5	-299.5	-6070.5
9.99701	2148	5471	15421.8	3356	-884	4098.75	-10883	25368.5	3955.5	11236	-1516	23032.2	18717	43703.5	47889.5	15682	1656	-3121.5
9.9968	-753	5203	15938.5	7148	3597.5	3100	-8011	29998.5	931.5	12259	3248	19821.2	15503.5	47278.5	57022	19642.5	-3695.5	813
9.99658	-8173	6112.5	11163.2	8622	3909	2183.75	279	31987.5	-1864.5	5958	7261	20362.2	12899	44763	52808	26453	-10308	5381
9.99637	-13123	3699.5	5930.25	5297	637	3500.25	14083	24992.5	-2562	-3180	9999	24588.5	10571	40294.5	39692.5	33266	-12889.5	9850
9.99615	-8950	-2199.5	3297	3310.5	-2150.5	7494	23629	15171	-1648.5	-7382	8782	25372	6033	37220	25602.5	34716.5	-13960	11718
9.99594	-1510	-5369	5586	8907.5	-3593.5	13108.5	21747	12928.5	-2253	-8436	2407	19748.5	2305.5	34213	15845.2	30525.5	-15685	7227
9.99573	-265	-2280.5	12348.2	17444	-4648.5	18284.2	15736	18151	-4120.5	-14320	-6093	15486.2	3252	29826.5	11579	26390	-13345	-3895
9.99551	-2207	2259.5	17618	19475	-2947	20056	15551	22683	-3489.5	-24649	-12049	19631.8	5655.5	27389	11724	24851.5	-4421	-13831.5
9.9953	1750	1606.5	15933.5	15879.5	3459.5	16557.5	17190	22705.5	-249	-30143	-13262	26581.8	3955	30365	15018.5	21516.5	3145.5	-12376
9.99509	8977	-4654.5	11009.5	17329	10033	10386.5	11312	20697.5	653	-27299	-10551	26181.5	-436.5	34984	20268.2	14213	496.5	-597
9.99487	8955	-11930.5	11938.2	27909.5	11517.5	7578.5	2495	19358	-3515.5	-23259	-5988	19631.2	-2045.5	33774	25088.2	9456.5	-9301	7032.5
9.99466	1933	-16198	20386.8	38307	10780.5	10610	3507	20417.5	-10233	-23241	-2131	17616.8	-1074.5	26507	25962.8	13669.5	-15758.5	18
9.99444	-1620	-15531	27922	38469	13120	14440	12657	25257	-17184	-22343	-1295	23955.8	-2780.5	21648	21687.5	22647	-14243	-13783.5
9.99423	967	-9691.5	27259.5	29977.5	15473.5	13024	14249	30951	-24305	-14388	-3058	30584.8	-7870.5	25034	16406.2	26740.5	-7885	-18818.5
9.99402	1606	-1812	20545	21683	12162	8004.25	3482	30683.5	-28525.5	-1984	-3084	30010	-9920.5	32060.5	16071	23802	-576.5	-12449
9.9938	-3638	2199.5	14831.8	18277	8104.5	6093.5	-5267	23505.5	-23978	7201	2855	24631.2	-3386	34267	20738	20368	4655	-5205
9.99359	-9355	-98.5	14217.5	17668	12964.5	8620.25	-176	18048.5	-11366.5	9319	12946	20881.5	9512	30307.5	23511.8	21465	4058.5	-3400
9.99338	-10452	-3728	18162.2	16153.5	23008	9725.25	11802	21099.5	-388	5562	19379	20541.2	20514.5	26552.5	19401	25438.5	-2444.5	-3279.5
9.99316	-6574	-2170	23175.2	11978.5	22993.5	5871.5	17419	28621	2156.5	-1184	16099	21634.8	22219	28243.5	12379.2	28764.5	-7815.5	-2566.5
9.99295	1118	4200.5	24213.8	5605.5	8184.5	788.75	14668	33647	770.5	-6901	5930	23471.5	14105.5	33611.5	10296	30994.5	-5547.5	-5254
9.99274	7715	9495.5	18151.5	-467	-8736.5	-1594.75	9928	36217	2425	-7096	-1730	26763	3203	37090.5	14761.5	34096	1339.5	-11154
9.99252	3828	11084	7878.75	-3151	-15985	-2907.5	6258	39035	5184.5	-1070	-872	30810.5	-2353	35893	20070.2	39549.5	4800.5	-11699
9.99231	-11523	12000.5	306.25	-1755	-15412	-4913.75	2841	40088.5	2631.5	5926	4782	33056.2	-1211	32074.5	21215.2	45801.5	2575	-2276.5
9.99209	-23060	13973.5	0	1485.5	-12777.5	-4209	175	36865.5	-4727	7420	6762	30438	1148	29281	18675	47459	-1370	9573.5
9.99188	-17393	13635	2850.5	4405	-7727.5	1638.75	-1477	32135.5	-10222	1682	2308	21166.2	-296.5	29241	15012.2	39895	-4275	14415
9.99167	-3023	8954	8010.5	6624.5	144.5	6993.5	-4755	28844.5	-10810	-7885	-2764	7614.25	-5539.5	31389	10959.8	26752.5	-5938	12503
9.99145	2247	4896.5	13454.8	8084.5	5759.5	4354.25	-10348	25035.5	-9062	-16089	-2374	-3002.5	-11361.5	33828.5	6731.5	18491	-4975.5	9588
9.99124	-2362	6939	17801.5	8609.5	6362.5	-4491.25	-12740	19931.5	-6905.5	-18754	1592	-4691.5	-13691.5	33381	4310.25	19693	-562	7985
9.99103	-3443	10998	18931.5	9719	7003	-10275.2	-6181	18258	-4070.5	-14934	2174	221	-9026.5	26718	5891.25	22474.5	3351	7928
9.99081	2774	6838.5	17186.2	13885	11973	-8366.5	6737	21792.5	-2003.5	-8192	-3188	3988.25	1480.5	14434	10895.5	17848.5	1812	11413
9.9906	7556	-7459	15952.5	20502.5	17556.5	-3065.75	16272	23805.5	-2953.5	-4153	-9922	3704.5	10110	3332.5	15806.5	9007.5	-3843	17971
9.99039	7508	-20921.5	17350.5	25247.5	18452.5	-289.25	14817	19542	-5082.5	-5387	-12997	3785	10505.5	1206	16618	6176.5	-7926.5	21965
9.99017	7449	-22775.5	19991.5	25212.5	14914	-1831	3890	15095	-4041.5	-9256	-12361	7301.5	6646.5	8550	11629	11800.5	-8728.5	20448.5
9.98996	7439	-14481	22007.8	22448.5	9324	-6964.5	-7038	17489	300.5	-10816	-10262	10795.8	6983	18074.5	3279.5	19180	-9674.5	18347
9.98974	3945	-4014.5	23319.8	20478	2357.5	-13847.5	-9091	22892.5	3739	-7159	-6732	10476.2	10903.5	23058	-2688.25	23705	-12799.5	19511
9.98953	1501	6495.5	24037.2	19405	-3840	-18354.2	-3341	24020.5	4544.5	387	-816	8028.5	10306.5	23296	-1668.25	26396.5	-16050.5	18907
9.98932	6056	19661.5	23969.8	16858	-5917	-16735.8	94	22892.5	5259	7114	5755	6229.75	4560	22035.5	5580.75	26834.5	-16842.5	11730.5
9.9891	9716	32225.5	24508	12430	-6136.5	-10998.5	-5004	26033	6952.5	9004	9605	3610.25	2493.5	20795	14204.5	22099.5	-14245	4456
9.98889	672	35232	27007.2	8647.5	-11031	-7322.75	-12252	32173	6782.5	7284	10115	-1660	6896.5	19470.5	20447.5	14571.5	-8368	6875
9.98868	-14352	26530.5	28189.2	7839	-19723	-8030	-11882	35142.5	3225	7117	10074	-6678.5	9126	18523	23744.2	12575	-1406	16943
9.98846	-17527	15502	22046.8	9758	-22303.5	-9363	-4746	34917	-138	10290	11424	-8105.5	4587.5	18164	24174	20162.5	1815.5	23800.5
9.98825	-7903	11771.5	8861	12077	-14307	-8190	425	35561.5	1573	11901	12248	-8102.25	2069.5	17339.5	21238.5	32314.5	-1649.5	23600
9.98804	-788	14709	0	11900.5	-4050	-6074.5	899	35520	9133	7225	9220	-9809.25	9635.5	16040.5	16411.2	42191.5	-8658.5	22075
9.98782	-59	17569	0	7173	-381.5	-4774.5	1759	30057	18916.5	-970	2529	-9610.5	20844.5	16778	13886.2	47076.5	-13401	22406
9.98761	5850	16984	1004.25	-1687.5	-1778	-2255.25	4868	21029	26141	-6155	-2547	-1185.25	24326	21203.5	16380.8	45899	-13343.5	20993.5
9.98739	18582	13941.5	5364	-11077.5	-3182.5	3874.75	6015	14846.5	27612.5	-7192	106	13708.5	19520	26792.5	21875	38353.5	-8803.5	16189.5
9.98718	24052	9286	7130.75	-16320.5	-4599	12020.2	3861	12648	23023.5	-8885	10823	25745.5	13624	29334	26447.8	29028	107	11736.5
9.98697	16998	3381.5	9310.25	-15425	-6046.5	18199	2220	11169	14653.5	-14292	22212	29792.2	9509.5	27449	28688	24960.5	11260.5	9500
9.98675	9137	-1802.5	11366.5	-10329.5	-2882	19715	1900	11105	5624.5	-21515	25452	29437.8	6218.5	22538	29285.2	25578.5	18101	6944
9.98654	6744	-4570	8575.5	-4037.5	5329	15763.5	-387	15516.5	-974.5	-28559	19004	28650.2	5797.5	15894.5	28249	22089	15659	4048
9.98633	1578	-6347.5	233.75	2549.5	8879	7206	-3173	21454	-1581.5	-36390	9838	25938.5	9631.5	8501	25582	10714	7834	5103.5
9.98611	-8655	-9263	0	9548.5	268	-2389.5	-244	22271	5951	-44973	5696	19775.8	12199.5	2479	23526.2	0	3043.5	10969.5
9.9859	-12507	-11865	0	14718	-13332.5	-7994.75	7476	17861	17816.5	-49413	7704	13831.5	8180.5	-52.5	24596.8	0	3401.5	16293.5
9.98568	-6777	-10196	0	14312	-19344	-7445.75	10026	14517.5	24834	-43548	11015	12471	2477	805.5	27376.8	0	3794.5	17165.5
9.98547	-5519	-2642.5	580.75	8640.5	-16836.5	-3117.75	2762	14873.5	21449	-27639	10597	15050.2	3858.5	3472	27407	0	1261	15545
9.98526	-15422	8374.5	4342.25	3813.5	-14910	1407.5	-6514	15552	12539.5	-11086	5183	18448.8	11219	6749.5	22861.8	0	-773.5	13995
9.98504	-21332	18953	8663.5	4726	-17455	4287.25	-9660	14784.5	7889	-5488	-2702	21778	15239	8973.5	16718.5	304	1430	12287
9.98483	-9930	26514	13688	8025.5	-19072.5	4917.5	-8486	14981	11524	-13397	-9019	24990.2	11823.5	6852.5	12627	9443	6786	11439.5
9.98462	8585	31091.5	16403.5	6015	-15005.5	3666.75	-7338	16778.5	19714.5	-25130	-11706	26288	5186.5	-1393.5	11200.8	14050	11803.5	14356.5
9.9844	16780	34948.5	14506.5	-3152	-6933	2940.5	-4543	16908	27139	-29271	-12878	25071.2	-1006	-11716.5	11327	14813.5	14098	19310.5
9.98419	13945	39759	10277.2	-13380	1368	5267.25	1241	13771	30598.5	-25259	-16125	24577.2	-6824	-16077.5	12578.2	17945.5	12200	19180
9.98398	9611	43620	9069.75	-18665.5	8254	8991.25	3746	10792.5	28449	-21241	-21106	27200.2	-10826.5	-9935	14932.8	22585.5	5665	10984.5
9.98376	5163	42758	13497.8	-18546	13917	8862.5	-3017	12658.5	21433	-20865	-23139	29701.8	-9825.5	3474	18216	21523	-2835	661.5
9.98355	-3376	36618	19916.5	-14832	19736.5	2363.25	-14439	20373	13579	-19447	-19231	27998	-4758.5	16911	22890.2	14665.5	-8539.5	-5122
9.98333	-13227	28738	22142	-8312.5	26828.5	-7141.75	-20800	30029.5	8243.5	-14515	-11644	24845.2	-273.5	25780.5	28978.2	10786	-9576	-6312.5
9.98312	-18872	21980	18854	-1216.5	32351.5	-14702	-19608	35478	4276	-11481	-3920	27004.5	2096	30213.5	33305.5	13020	-9100.5	-5229
9.98291	-21688	16004	15292.8	1811.5	30240.5	-18482.2	-16065	34162	-119	-14284	3296	34875	4661.5	31948.5	31537.2	12952	-11177	-1522
9.98269	-24961	10289	16191.2	-1115.5	19541	-19210	-14702	31026	-2152.5	-18089	9956	40336.5	7470.5	31242.5	25280.8	4535	-15866	3610.5
9.98248	-25636	5910.5	19027.5	-6079	8684.5	-17961.8	-16713	33182	1176	-17844	13641	36384.2	7358	27469	23107.2	0	-19483.5	4239
9.98227	-20071	2805	17328.5	-8404	6623	-15801	-22302	40279.5	5229.5	-17504	12844	25099	3801.5	21440.5	30273.8	0	-19045	-2666.5
9.98205	-11708	-908	9941	-7697	12339	-12945	-29496	45585	1477	-22726	10653	14463.5	619.5	15437	40513	1310.5	-15669	-10566
9.98184	-5302	-4753.5	3209.75	-5320.5	17848	-7514.25	-32943	47080.5	-10514	-29483	10900	10186.2	692.5	11015	43325	4948	-13114.5	-10887
9.98163	-245	-4790	2669.75	-765.5	18848.5	1788	-29039	49273.5	-21413	-28935	12506	12070.8	2850.5	8362.5	37241	3663	-12745.5	-4374.5
9.98141	3816	838	5797.5	5920.5	17124	11340.8	-20251	51793.5	-23663	-20493	12029	15869.5	4847.5	7904.5	29575.5	5263	-11440.5	1046
9.9812	2812	8547.5	5880.25	11712	14604	15078.2	-10808	46794.5	-18800	-11423	9958	16987	6488	10384	24192.8	13434	-6616.5	1056
9.98098	-3247	13887.5	1400.5	14552	11012	12503.5	-1703	33465	-11988	-5784	9368	13882.8	9262.5	14578.5	17309.8	21241.5	-1666.5	-2502
9.98077	-5967	16123.5	0	16593.5	7131	9871.75	6218	24480.5	-5535.5	-2125	9404	9003.25	14523.5	17541.5	6866.75	21692	-1793.5	-7409.5
9.98056	-536	16130.5	0	19797.5	5687.5	11641.8	9069	28940	-196	-485	5816	5533.25	21269.5	18749.5	-1650.5	18244	-4847	-12393.5
9.98034	5652	13724.5	4506.5	21765.5	8341.5	15206.8	5407	37824.5	2677.5	-2886	-1810	3454	24741	21378	-2914	19870.5	-2706.5	-13618.5
9.98013	4125	9797.5	4976	19854	14367.5	16402.5	674	37200.5	3395	-7221	-8456	564.25	19843	27252	323	29039.5	6186.5	-7002.5
9.97992	-2139	7235.5	0	15450.5	21864.5	15601.5	39	28520.5	4125	-8707	-9921	-2971	7970.5	33431	1805.25	39204	12626.5	4790.5
9.9797	-5146	6929.5	0	9830.5	28157.5	15117.5	531	23611	4794	-7658	-6360	-3771.25	-2584	36847.5	343.5	42849.5	9442.5	13242.5
9.97949	-4076	6878.5	0	836	30200.5	14732.8	-3023	25079.5	3184.5	-8808	509	588.25	-5539	39232.5	-637	38398	2269.5	13458
9.97928	-3039	7565	0	-10281	26968.5	13583.5	-7629	25271	594	-12832	8646	8779.75	-3076.5	43287	1175.75	29549.5	1114.5	8388
9.97906	-2378	12698	0	-14206	20634	12992	-5746	22135	1704.5	-15588	13757	17336.8	-1291	46856	5830.25	20925.5	6073.5	2445.5
9.97885	-187	21193.5	0	-4727.5	13784.5	13588.8	2168	22727	6402	-15926	11815	22649.8	-2956	46272	12452.2	15070.5	9121	-4265
9.97863	1511	25114	0	8975	6941	12732.5	7044	30291.5	7804.5	-17135	5118	21416.2	-7296	43319.5	17673	12003.5	6957.5	-12735.5
9.97842	-1125	21233.5	0	11792.5	438.5	8727	3845	38933	2132.5	-19988	830	12828	-12441.5	42755	16295	10670.5	3636	-20000
9.97821	-8227	18172.5	9003	3522	-3112.5	4843.75	-2243	43083	-5254	-21366	1916	1831.75	-14637	44233	8316	10803.5	1623	-21323.5
9.97799	-17037	24265.5	20909.5	-578.5	-803.5	5128.25	-4287	43630	-8240	-20916	4450	-3070.25	-9351.5	43291.5	1829.5	12740	-1568.5	-16299
9.97778	-24994	33830.5	27408	8506	6370.5	8433.75	-2407	42880.5	-8756	-22379	5064	2158.75	2659.5	39741	3425	15400	-7117.5	-9965
9.97757	-29488	35268.5	24937.8	21823.5	12663	10411.5	-1053	40545.5	-11290	-26610	5035	13097.5	13903.5	38139.5	8910.75	16419.5	-12047.5	-7856.5
9.97735	-29040	29103.5	15430.2	26473	11648.5	9512.25	-1699	36303	-13473	-29266	4977	22509.5	18291.5	39885	9795.25	15603	-13979	-11390
9.97714	-26509	26576.5	5308	22305.5	2242	7648.25	-1990	30863.5	-9651	-27444	2277	27576.5	17306	41972	5877.75	16146.5	-13313	-17816
9.97692	-25807	31129	528.5	18538	-9057.5	6804.75	-247	23931	-1052.5	-23673	-2827	29414	15500.5	43946.5	3722.75	20008.5	-10092	-23095.5
9.97671	-24509	33283	1227	20105	-14326	8003.25	2347	15523	5385.5	-21651	-5483	28243.2	14717	48197	4676	23806.5	-4191.5	-24205
9.9765	-16537	26591	2259.75	24045.5	-13699.5	11444	3909	8410.5	7381.5	-22324	-4817	23021.5	15837.5	52320.5	3304.25	22793	707.5	-19856.5
9.97628	-3052	17968	0	25889	-14561.5	14872.5	4305	5031.5	9059	-25194	-7102	15092.2	20499.5	50138	-2253.75	18114.5	-569.5	-10938.5
9.97607	7509	16514	0	23863	-18580.5	14464.2	4770	4141	11925.5	-29203	-14260	8567.75	26878	42958	-7214	16085	-6892	-1007.5
9.97586	11759	20077	0	18355.5	-15978	10211.8	5585	4840.5	11560	-31605	-16575	6378	29225	40544.5	-8850	19703	-10924	5245.5
9.97564	14759	19945	0	11206.5	168.5	7220	5163	10063.5	6066	-29989	-5794	7974.5	26082.5	46312.5	-9831.75	24694.5	-8963	6045
9.97543	18926	13810.5	741.25	4914	19453	8401.5	2224	20167	1821.5	-25948	9900	11240	23500.5	50413	-10388.8	25408.5	-5062	4482.5
9.97522	19184	7008.5	1185.75	870.5	24833.5	9583.5	-1733	27373	6116	-23114	14833	14832	25782.5	43877.5	-5549	21489.5	-3020.5	4443.5
9.975	13027	3357.5	2504	-575	15729.5	5909.25	-3574	24477.5	17168	-21840	7193	18137.8	29163	31943	5604.5	16957.5	-470	5362
9.97479	6585	1220.5	8276.75	1335.5	8474	-698.75	-2129	16238.5	25836	-19450	313	20361.8	29462	25698.5	15268.5	15428	4720	4031.5
9.97457	6189	-1568.5	17577.5	6018.5	12902	-5147	758	13968	25991	-14771	2818	20464.5	29224	26824.5	16818.8	18134	7642.5	1153
9.97436	10962	-3741.5	24907.2	8832	20478.5	-6386	2826	20654	19596.5	-8678	8666	17643.5	31441.5	29127.5	13574	24244	2616.5	1448
9.97415	16959	-2966.5	25178.8	5073.5	19371	-5589.75	3536	29122	12058.5	-1816	9332	12084.5	33094.5	30433.5	12350.8	31113.5	-6315	5734.5
9.97393	21561	239.5	18626.2	-2682	10436.5	-1226	3674	33239	6440	3845	5558	5802.5	31728.5	33665	13336.5	36101	-8112.5	7679.5
9.97372	21525	2395.5	10720	-6601.5	2407	6924.25	4409	33012.5	3588	3787	2044	2012.75	31796.5	38366.5	11996.2	39450	1530	2059.5
9.97351	14650	529.5	6644.25	-4085	-310.5	11752	6700	29624.5	4693.5	-3160	-1215	2353.5	36810	39705.5	6931	43081	14489	-7344.5
9.97329	5654	-4303	5940.25	-223.5	1018.5	5095	10042	23327.5	10002	-10074	-6136	4899.75	41154.5	35871	383.25	45784.5	20022.5	-12704
9.97308	2560	-7324.5	4110.25	2029.5	3690	-10568.5	11965	16503.5	15564.5	-9502	-11348	6184	37583.5	30432	-5526	43464	16294.5	-12599
9.97287	5675	-5028.5	0	6975.5	4102.5	-23759.8	10409	12499.5	15231.5	-3634	-16097	5320.5	27560.5	27490.5	-8037	36012	9552	-12319
9.97265	8375	47.5	0	17381	63.5	-27088.8	6156	11508.5	7877	-375	-24244	4971.5	16955	28602	-3167.25	29360	5179.5	-14810.5
9.97244	8911	1336	5448.5	27200	-3686.5	-22462.5	1500	12493.5	245	-1509	-37491	7594.25	7560	32833.5	8346.25	27277.5	3839	-17024.5
9.97222	11041	-4206.5	17203.2	28989	1073.5	-14390	-2193	17168.5	2.5	-2533	-48327	11385.2	357	35820	18037.2	25604	5161	-16143
9.97201	12386	-12155.5	25028.2	24023	13560	-5658	-3790	26199.5	7463.5	-2572	-47172	11112.5	-149.5	31502.5	18985.5	19610	9963	-14390
9.9718	5036	-15552	23744.5	19087.5	22580.5	436.25	-1463	34022	16679.5	-5499	-34914	3755.25	5935	19672.5	15245.8	13324.5	16956.5	-15034
9.97158	-9185	-12652	16726	16774.5	21705.5	1451.25	4172	34607.5	22766.5	-11534	-21696	-6958.25	8632	8909	15301.5	15027.5	21069.5	-17013
9.97137	-16919	-8113	10976	14814.5	17640	535.5	7940	30707	24170	-16398	-14059	-13056.8	1618	6536	18626.2	25461.5	18237.5	-16724.5
9.97116	-11748	-6869	10549.8	12095	18466	2682.25	5390	30133.5	19309	-19315	-9968	-10296.5	-5593	8638.5	16802.2	37307	9823	-13506
9.97094	-2970	-8731.5	15383.5	9311.5	22259	5465.25	-852	34082.5	7306	-23390	-6599	-2514.75	-911.5	6512.5	7373.5	45672.5	-285.5	-10339.5
9.97073	-386	-10023	23211	5586	24074.5	1528.75	-4213	36476	-6363	-27347	-5666	3370.25	10882.5	551	-1707.25	52131.5	-10467	-9390.5
9.97052	-1542	-9226.5	30633.2	64.5	26031.5	-8064	-2487	34314	-10996	-25631	-8177	5374.25	15319.5	-128.5	-3079.25	57509.5	-19957.5	-9133.5
9.9703	-317	-8691.5	34463	-4441.5	31820	-11966.5	1278	31298.5	-1911.5	-18155	-10089	7048	10294.5	8468	1605	57542	-25661	-6801.5
9.97009	2340	-10274	34052.2	-4464	37247	-3927.25	4662	30518.5	12701.5	-11511	-8087	11034.5	6275.5	19111.5	6845.25	48964.5	-25654.5	-2667
9.96987	3499	-11931.5	31240.8	-1399.5	35227.5	7984.75	7181	29824	20591	-8835	-5977	15567	6988	22597	10716.5	35674.5	-24088.5	-592.5
9.96966	5193	-11051.5	27307	435	26517.5	12760.8	6808	25981	18963.5	-7085	-9815	17747.2	5296	17658.5	13320.2	25767	-26545	-3784.5
9.96945	9218	-9486	22061.8	-280	17978	10183	1560	19271	14808.5	-6211	-18259	16893.2	-1164.5	10015.5	12632	24640.5	-31399	-10598
9.96923	12246	-11517.5	16776	-2222	12950.5	7276.5	-5200	13180.5	13365	-11379	-23283	13718.5	-4673	5754.5	6759.5	31918	-32491.5	-15835.5
9.96902	11831	-16900	14733.5	-5374.5	9467.5	6993.75	-7132	11908	12034.5	-22188	-20872	9558.75	-710	7227.5	-2006.5	42023.5	-30020.5	-16528
9.96881	10773	-19881	16392.5	-9207	5365.5	7372.5	-3478	17034	6858.5	-28700	-16084	7552	5308.5	12541.5	-9412.25	46951.5	-30362	-15068
9.96859	11236	-16501	16970.5	-9033	169.5	7675.75	13	24567.5	-104.5	-23913	-15148	10734.8	7978	17885	-14238.5	42155.5	-33739	-15546
9.96838	11349	-9493	12767.8	-892.5	-5416	8210.5	-690	27871.5	-3612.5	-13360	-16663	17130.8	8691.5	21680.5	-17868.5	31366.5	-31665	-18082
9.96816	10679	-3786	8035	10824	-8308.5	6577.25	-3968	25577.5	-2952.5	-6983	-14659	20743.8	9554.5	25687.5	-19903	22986	-21119.5	-18614
9.96795	11533	10	10669	17424.5	-5034.5	739	-6905	22832	-2501.5	-7383	-8183	19764.2	9393.5	30734	-17741.5	21042	-12251	-14247.5
9.96774	12508	4807	21254.5	17379	2338.5	-5386	-7878	23097.5	-4611.5	-11415	-2785	19099	8535	33996.5	-10931.2	22698.5	-14756.5	-7235
9.96752	9305	11340	31313	16634	7387.5	-5000	-4755	24712	-5915	-17588	-2361	21200.8	9846	33133.5	-3081.25	24649.5	-23473.5	-2837
9.96731	3867	16304.5	33796	17200.5	8905.5	3376	3165	27743.5	-2718.5	-25216	-4315	19818.2	12982	29980	2101.25	27471.5	-26121	-3703.5
9.9671	3070	16382.5	30792.8	13886.5	12276	14867.5	11020	35524.5	2808	-29729	-4827	9147.75	14489	26441	5161.75	32450	-20765.5	-7155.5
9.96688	6184	12660	28248.5	4845	17917.5	24292.5	12582	44873.5	5240.5	-25585	-4748	-4737.5	14341.5	20107	9624.5	38542.5	-16524	-8399.5
9.96667	4235	10025	27175.5	-3187	17213.5	29307.5	8835	45021	3113	-13611	-6703	-9707.75	15353	8982	17090	44471	-19121.5	-6052
9.96646	-5338	11284	24512	-5074.5	6043.5	29015.5	5710	33917.5	-748	-1513	-9224	-3411.25	16301.5	-2201.5	25302.8	49973.5	-24342.5	-3189.5
9.96624	-14122	12199.5	20142.2	-5464	-5823.5	24008.2	3808	25528	-5391	3756	-8557	4813.5	13458	-6177	30837	53067.5	-25911	-2415.5
9.96603	-15676	5580.5	17530.2	-10421.5	-6625.5	17236.8	-1143	30694	-12351	2812	-5357	8123.75	8698.5	-1884	31734	50089	-23250	-1983.5
9.96581	-12277	-7638	17506.2	-16888	2616.5	11088.5	-7610	40027.5	-18560	2837	-4713	10021.5	7911.5	6342.5	27458.2	40980.5	-20210.5	651.5
9.9656	-6281	-15707	16603.2	-17976.5	12488	4440.75	-8398	38220.5	-15557.5	8937	-8782	15615.5	11556.5	16082	19182.8	31056	-20124.5	3002
9.96539	3299	-9753.5	13142.2	-13948.5	17680	-3627.5	-3464	27131.5	-988.5	16648	-13468	22488	14979.5	26776.5	11439.2	25025.5	-22574.5	-298.5
9.96517	12534	3162.5	10565	-9147	17351.5	-8530	-1483	20140.5	14198	16370	-14037	24833.8	17416.5	34080	10150	22511	-23117.5	-8860
9.96496	13258	8242.5	11736.8	-1686	10007	-3755	-4539	19900	17083	6907	-10597	21756.8	21768.5	32318	15891.8	21666.5	-17957	-14615
9.96475	5600	2248.5	13213.2	12865	-2398.5	9796.75	-2489	17811.5	8335.5	-909	-5941	17041.2	26041	23536	21637	23248	-10527.5	-11128
9.96453	-2222	-4794.5	9176.25	28248.5	-10603	22716	10585	11849.5	-740	1231	-941	14117.2	24782.5	17025	21058.5	27674	-9320	-1353
9.96432	-9095	-6850	0	30201	-8085	26866.5	24509	8341.5	-4169	6836	4875	14662.2	19270.5	17571.5	16891.8	31439	-16349.5	7041.5
9.96411	-21600	-9048.5	0	16151	-1066	22766.2	26795	7492	-5429	4626	9947	18646.8	16693.5	19900.5	16302	30694.5	-23220	10931
9.96389	-36284	-14308.5	0	1687.5	424.5	15700.8	20769	3414.5	-6420.5	-4355	11011	22308.2	18772.5	17431.5	19963.8	26688.5	-23060	12277
9.96368	-37918	-15030	0	930.5	-2721.5	8330.25	19730	-1138	-2813.5	-9989	6543	19658	20628.5	11678	22157.8	24198	-20106.5	12198.5
9.96346	-22115	-5726.5	0	9050	-2434	618.25	27517	3895.5	6608	-9944	-1861	9976.25	20965	9488	20990	25642.5	-21018	10226
9.96325	-4130	5894	0	12488	1781.5	-5084.5	34640	17741	14991.5	-10746	-10912	779.75	23053.5	14094	20928.8	29168	-23108.5	8618
9.96304	2596	9967.5	3479	9102	2491.5	-3799.5	32183	27292	16707.5	-12801	-17219	-699	25154	22188	23866.5	31238.5	-20281	11151.5
9.96282	1885	9022.5	4856	7053	-2771.5	5640.5	22000	27418.5	14703	-7737	-18919	3842.25	21099.5	28453	25262	29217	-15422	16117
9.96261	1016	11310	3046	8121	-8130	16831.5	13084	28310	13766.5	6464	-17496	7840	12061	30815.5	22262.8	23056.5	-15618	15997
9.9624	-2651	15780.5	2114.5	5232	-9052.5	21665.8	12300	37308	12959.5	19490	-16790	9542.75	6838	31542	18848.2	16229.5	-17759	7394.5
9.96218	-10766	15176	3829.25	-3239	-7491.5	19305	18335	46620.5	10101.5	22581	-18386	12193.8	8281	33871	18795.8	13182	-11256.5	-2806
9.96197	-14223	10263.5	5021.5	-8921.5	-7099.5	16011.5	22778	45918	7621	18709	-19556	16410.8	10097	37785	19570	14449.5	4261.5	-5488.5
9.96176	-6512	9206.5	2904.75	-6749.5	-9697.5	15732.8	19210	36113	7623	14201	-17789	18476.5	9327	40224.5	17873.5	16464.5	15385.5	-836.5
9.96154	4488	13971.5	0	-2716	-15948	15193.8	11542	23557	6539	9192	-15096	16344	10514	39711.5	15934.5	17124	12185	3282
9.96133	8691	17968	0	-3500	-23636.5	10863.2	8749	10168	1651.5	1557	-14235	12465.2	14167	38246	17335.2	18171	131.5	3477.5
9.96111	7134	17603	1630.75	-7086	-26427	6261	11251	-3027	-1709.5	-7319	-12692	10136	12964.5	37378	21259.8	20521	-8759	5349
9.9609	4083	17015	4490	-9488.5	-20261	7039.25	10254	-10141.5	2781	-15652	-5676	11047.5	4689	35786	25456.8	21515	-9331.5	13815
9.96069	-2286	20067	8830.25	-12650	-9819	11675.5	2727	-6108.5	11894.5	-23648	5124	16408	-1824.5	33047.5	30003.2	19754	-4311	23859
9.96047	-11641	24995.5	15823.2	-18350	-3313	13703.2	-2318	6108.5	17372.5	-29207	11715	25805.8	210	31839.5	33559.2	18582	1535	25677.5
9.96026	-15786	28063	21654.8	-21386.5	-2653.5	11808.5	2352	18869.5	18020	-28229	10308	34288.8	5878.5	32698	31721.8	20751	4218.5	17140
9.96005	-11211	26578.5	20455	-17600	-3936.5	10145.8	10502	26509	18511	-22615	6183	35500.2	8224	30603.5	24865	23027	1883	6319.5
9.95983	-5977	18659	12562.5	-13002	-4946	8735	11332	26289	18323	-20714	5191	29622	8663	22024.5	21601	20741	-3615	1622
9.95962	-5342	6126	4905	-14934	-6053	2586	3417	18719.5	12113.5	-25963	5871	24171	10806	12216.5	27291.5	15124	-9287	3667.5
9.9594	-3518	-3188.5	2627	-18356	-6237	-6952	-6806	10279.5	1584.5	-32015	4607	24790.8	11703.5	9427	34667.8	11169	-15405	7778.5
9.95919	1133	-2503	4664.75	-12161.5	-4885	-9065.75	-14131	10137	-3151.5	-32513	3635	28957.5	7070.5	13858.5	34208.2	10033.5	-23247.5	9922
9.95898	-1868	5254.5	7665.5	2739	-5579	2519.25	-15719	20189.5	2765	-28546	7029	31263.5	-177	18491	28829.8	8930.5	-29368	7816.5
9.95876	-15839	11635	9206.25	13237.5	-11382	19203.5	-9744	32330.5	12031	-23140	11531	31213	-3473.5	19320.5	28427.8	7903.5	-28313.5	399
9.95855	-25044	13352	6651.25	12349	-17796.5	27794.2	-126	38028	15822	-16033	9330	32173.8	-1151.5	18412	33538	11255	-21276	-9676
9.95834	-16902	12332.5	0	6488	-17175	25968.5	3464	36647.5	14298	-7909	-240	35173.8	3120	17678.5	35566.8	20843.5	-15419	-15808
9.95812	-2233	8693	0	2506	-9577	20896.5	-2472	32924.5	11936.5	-2680	-9155	37817.2	4862	16317.5	31849.5	31655	-13576	-14098.5
9.95791	2754	2852.5	0	-1179	-3257.5	17157	-9303	30830	8925	-1858	-11888	38320.2	992	14719	29207	36240.5	-11286.5	-8359
9.9577	1755	1701.5	914.5	-6376.5	-4275	13806.2	-9315	31472.5	3565	-3124	-11035	37236.5	-7699	14929.5	31565	32436	-5676	-4542.5
9.95748	7818	11126.5	12600.5	-9069	-10358.5	10585	-7543	32929	-1126.5	-6502	-9725	35558.8	-13986.5	16493.5	34150	25817.5	-516.5	-2788
9.95727	18520	22928.5	17297.2	-8408.5	-15108	9040.5	-11894	31177	-373.5	-13889	-6011	33733.2	-9807.5	16874	32530.8	24555	262	-243.5
9.95705	21092	21507.5	14978.8	-12297.5	-14647	7964.25	-18690	24809	4203	-20597	802	32244.8	3053.5	16181	29016	31151.5	-1740	977
9.95684	14601	5516.5	10455.8	-24783.5	-10440	3708	-18969	18436.5	5266.5	-17774	5027	30937.8	13654	16313	26935.5	39352.5	-3076	-3553.5
9.95663	8568	-8914.5	6771.25	-34927	-7769	-4949.75	-14083	17462.5	-1149.5	-6824	2194	28156.8	15330	15589	25240.8	40968.5	-2974	-10769
9.95641	5346	-10168	5879.75	-28989.5	-10123	-15989.2	-13428	20963	-11338	-555	-3032	22697.2	12023	10352.5	21772	35576	-1616	-11828
9.9562	1124	-5154.5	9606.25	-10072	-14293	-26272.5	-19781	24369	-18941.5	-4943	-3549	16268.8	9355	2694	16928.2	30366	1855	-5414
9.95599	-951	-6050.5	14640.2	5051	-14450.5	-31022.5	-27585	26664	-20791	-10644	-1010	12154.5	7316.5	383	12310	30116.5	7327.5	-485.5
9.95577	4286	-13150.5	12560	7559.5	-11392	-25211.8	-33117	29052	-17260.5	-8639	-2747	12116.8	5212	7002	9627.25	31765.5	12985	-2071
9.95556	10498	-18117	1495	5033	-11607	-10958	-35895	29640	-10297.5	-3169	-9448	16455.8	5918.5	17180.5	10611	30446.5	17310.5	-3006.5
9.95535	8091	-16921	0	7289.5	-15828.5	563.25	-32569	26921	-2998.5	-1561	-13964	25368.5	10274	23913.5	13629.5	25820	18566	4018
9.95513	2367	-12357	0	13400.5	-16791.5	1498	-20735	25642	986	-2107	-12331	36627.8	13495.5	26432.5	12710.5	19502	13629.5	13580
9.95492	6824	-8540.5	1019.25	16905.5	-11792.5	-1975	-7635	30556.5	114.5	-1406	-8310	43010.2	11842	28524.5	6194.25	11452.5	2628.5	14987.5
9.9547	20789	-8130	0	16777.5	-8138.5	960.25	-3893	36807	-3082	-3917	-5794	37411.2	7445	32478	3085.25	3287.5	-6771	7813.5
9.95449	29825	-10731.5	0	17238	-10617.5	9196.75	-8533	36207.5	-3990	-13241	-3871	22126.8	2748.5	36936	11778.2	525.5	-6762.5	1250.5
9.95428	27443	-10871.5	0	20309	-13118	12129	-10427	31148	-145	-21956	-2069	8668.5	-4043	38678.5	25083.5	6078.5	-204.5	536
9.95406	21282	-3232	0	23896	-10095.5	6514	-4928	31366.5	6971	-21308	-3927	5662	-13824	35522	27972.5	15014	3839.5	2387.5
9.95385	17817	7446.5	0	25865.5	-6833.5	195.5	1162	37690.5	13928	-14907	-11126	10221.2	-22155	29150.5	19438	20925	4558.5	2978.5
9.95364	14854	9240.5	0	25994	-9193	-890.25	2074	40618.5	17982	-11950	-18574	13848.5	-24215.5	24780.5	13390.5	23825	9424	2800.5
9.95342	9959	-308.5	0	24480	-12337.5	1309.25	303	35819.5	17843	-12319	-19799	12931.8	-20171	25845.5	16134.8	26171	19009.5	3016
9.95321	4142	-8927.5	0	21652	-10493	5216.75	-853	29401.5	14018.5	-9379	-14630	9246	-12914.5	29932.5	17519.5	25393.5	23303.5	3108.5
9.95299	-3511	-6820.5	2684.75	18802.5	-9283.5	12779.2	-2629	25836	9901.5	-3173	-8394	3607.25	-4810.5	32318.5	9854	17967	17017.5	3100
9.95278	-14147	-626.5	180	16532	-15724.5	20982.5	-5543	22257.5	10575.5	-96	-5463	-4689.25	1433	31587.5	1479	8043	7851	3456
9.95257	-22076	-1945	0	12491.5	-23557	20375.8	-6656	18102.5	17566.5	-2144	-6050	-13236.5	3669	28745	2336.75	3756	3930	2530
9.95235	-19700	-9079.5	0	3996.5	-22935.5	7377.75	-5135	19269	25532.5	-5807	-7676	-17730	3943	23665.5	7676.25	6203	2869.5	-1774.5
9.95214	-9545	-10662	264.5	-6400.5	-18576.5	-9639.5	-3970	27509.5	27490	-9230	-8235	-18455.5	6428.5	17049	7527.5	9696.5	184	-8066.5
9.95193	-2345	-3484.5	3058.25	-11305.5	-21989	-21065.2	-3921	34782.5	23070.5	-12140	-8885	-19729.2	10838.5	13200	3784.5	11677.5	-643.5	-12883.5
9.95171	-3569	3877	7483.25	-6759.5	-29345	-25675.5	-2203	33609	17706.5	-11704	-13379	-21441.8	13238.5	15089.5	5364	14183.5	4692	-14825
9.9515	-9735	4246.5	16233	2211.5	-24749.5	-25889.2	1010	26119.5	13644.5	-6696	-21626	-17444	13331	18636	11822	16339	11202.5	-13639.5
9.95129	-16165	-426.5	22249.8	7292.5	-5670	-21793.8	1742	18834	7417.5	-3174	-25485	-5766	14335.5	18101.5	14394.5	14788	11119	-8135.5
9.95107	-20136	-5151.5	16951.5	6579.5	11882	-15082.2	78	14951.5	-1801	-8026	-16966	5251.25	15859	15411	11187.8	12395.5	5980.5	-372.5
9.95086	-18566	-8121	5516	5000	16754.5	-11043.5	1822	14818.5	-7774	-19348	-694	6530.25	14665	17073.5	10033.8	16838.5	3778.5	1621.5
9.95064	-10917	-9114.5	2165.25	6026.5	16118	-10525.8	9100	17448.5	-6006	-30235	9228	292.25	12350.5	22997.5	15699	27859.5	7419	-6738.5
9.95043	-2533	-7588.5	10033	7850.5	20108.5	-6939.25	15601	19128.5	-1742	-38638	6903	-3524.25	13482	26268	23063.2	34906	13259.5	-16827.5
9.95022	1713	-4958.5	16657	8643	26210.5	2635.75	14971	17001	-2489	-45634	1437	-746.25	16311	24314.5	24807.2	31556	17795.5	-16013
9.95	3901	-4942.5	12205.5	10374.5	26754	10627.2	8782	15337	-6251	-47619	2271	3630	15481.5	22483	19845.8	24312	18998.5	-5968.5
9.94979	7022	-9098	2859	14402.5	22430	10349.8	2430	20706	-5163	-39882	6034	4989	13888.5	24983.5	12594.5	22080	14364	-984
9.94958	8249	-13822.5	1287.25	17596.5	19882	7082.75	-2181	29897	1285	-26437	4503	5183.75	19458.5	29282	7917	24003.5	4631.5	-6580.5
9.94936	5815	-13403.5	10355.5	17253.5	21111.5	9249.5	-5595	31705.5	5861.5	-17592	-1432	7089.25	28733	31579.5	7560	23668.5	-3379	-11813
9.94915	5807	-5678	21601.2	16725.5	21894.5	14636.8	-6023	23015	6654.5	-17579	-4508	8782.5	28035.5	31763.5	9172.25	19617	-4401.5	-7814.5
9.94894	12463	5465	26130.8	20906	18122	15184.8	-624	13869.5	10720	-21178	-3202	7227.5	15421.5	30867	9404.5	15219	-2763	-2459
9.94872	18186	13288.5	22669.2	27950.5	9948.5	11008	9077	13119	21300.5	-22228	-2168	4608.5	6739.5	29026.5	9240.25	12192.5	-6643	-7584
9.94851	14042	14840	16666.5	31048.5	1481	9055.5	16430	17629	30249	-19679	-3270	6521.75	12400	27684.5	13216	10330	-16939	-19988.5
9.94829	4493	13921	14086.5	27931	-2129.5	10171	15541	19727	29447.5	-15936	-4485	14315.2	21913.5	28757	21231.2	10642	-28065.5	-26066
9.94808	134	15553	15310.5	23186	808	8044.75	7468	17505.5	23391	-14055	-5772	22165.5	21401.5	30387	25708.5	13378	-36801	-20838
9.94787	1019	18718	15056.2	20661.5	6702	1040.75	-538	13542	22738.5	-15658	-7802	22440	13986.5	28519	21096.8	15390.5	-43248	-11703
9.94765	-531	18740	9939.75	18867	10850.5	-4146.5	-3413	10351.5	29057.5	-18116	-6411	12867.2	10443.5	23420	12290	14226	-45419.5	-5000
9.94744	-4762	16296.5	4192	15489	11874	-2182.75	-4683	10919.5	34013.5	-16402	2929	-1695.5	9725.5	19382.5	8605	12439.5	-40794.5	923
9.94723	-5112	17707	3704.25	11680.5	10512.5	4447.75	-10672	17424	32378.5	-10731	15221	-13656.8	3228	17707.5	12548.5	13383	-32447	8071
9.94701	-1626	24135.5	6337.75	9148	7638	9915	-18634	26321.5	27966.5	-8049	18796	-18268	-7620.5	15857	19584	15343	-26403	12685
9.9468	-1615	27010.5	4975.25	6590	5892.5	10491.5	-17691	30706	25428	-12014	9029	-15270.5	-12306.5	13808.5	26073.8	14742	-22909	10494
9.94659	-7998	18797.5	0	2269	8282.5	5251.75	-4768	29604.5	23017.5	-17106	-7620	-6760.75	-7734.5	14666	31847	12775	-16872.5	3294.5
9.94637	-17018	3651	0	-2064	11878	-3345.5	7975	28388	17073.5	-17470	-23280	4171.5	-2143.5	18285.5	36789	13358.5	-7316.5	-2938
9.94616	-25815	-7678	5991.25	-3029.5	9323.5	-9521.25	8001	28709.5	9097.5	-15303	-34774	12665.5	-2269	20952.5	40043.5	15856.5	-134	-4181.5
9.94594	-33091	-10029	9411.75	-646.5	907	-9707	-1491	25980	3755.5	-14147	-39915	13704	-5096	22125.5	41550.2	15480.5	-83.5	-1115.5
9.94573	-35075	-6130.5	2227.75	1053	-2876.5	-7531.75	-8225	18873	2009	-10557	-36543	7698.75	-3257.5	24424.5	40803.8	10869	-4883	2340.5
9.94552	-30272	-235.5	0	-843.5	3253.5	-8658.25	-8353	13033	766	-771	-27482	2523.25	6504	26117	36245	6459.5	-8563.5	2699.5
9.9453	-25138	4917.5	0	-3462	10673	-12236	-7678	12330.5	-1007	9878	-18862	6042.25	19943	21508	29211.2	6652.5	-7181.5	857.5
9.94509	-25714	7078	9854.75	-139	11593.5	-13112	-9140	13920.5	-141	13254	-11226	16844.5	27391	10780	25117.2	11325	-869	2092
9.94488	-27153	6098	21240.8	11582	11955.5	-10716.2	-9978	14666	5210.5	10124	204	25649.5	21899	2039.5	26563.8	17713	6448.5	9815.5
9.94466	-21319	5542.5	17832.5	24829	18207	-9006.75	-10031	15154	11212.5	6966	14373	25961.5	8100.5	1201.5	29000	23464	9335	19873
9.94445	-10869	8050	3386.75	29309.5	21708	-8848.75	-12432	14956.5	12545	5092	22280	20350.2	-884	6349.5	28060.2	27085	5818	24175
9.94423	-5308	10264.5	0	22980.5	11813	-7923.75	-15729	11399.5	9318.5	1667	19864	16177.8	1823	13257.5	26969.8	28109	-301.5	20263
9.94402	-5971	7036	0	14080	-3325	-7586.25	-14934	5519	6284.5	-2161	14546	18303	9904	19030	30478.5	27703.5	-4207	14117.5
9.94381	-5210	-283	0	9902.5	-6600.5	-11572	-11012	2200.5	5551	-3377	13542	26337.8	13985.5	19549.5	35449.2	27197	-5125	12367
9.94359	1657	-4691	0	8419	2175	-17217.2	-9976	2527	4093	-4322	13195	35764.2	12368.5	12655	35240.2	25739.5	-3992	14499.5
9.94338	12402	-2621	1941.75	4513	8001.5	-16245.8	-11584	2956.5	-240.5	-8739	6599	40823.2	8244.5	5827.5	30756	21365.5	386	14933
9.94317	22921	2231	6502	-998	5250	-6301.5	-8792	2861.5	-4126.5	-13388	-4364	38954	3334	10555.5	28552.8	14495	8062.5	11178.5
9.94295	28486	4635.5	5525.75	-4771	2157.5	5686.5	-766	5038.5	-3088.5	-12624	-11873	33031.5	-622.5	25519	29080	8331	13754	7210.5
9.94274	24455	3452	2228	-8804	1957.5	13754	3381	8460.5	2224	-9023	-12694	27134.5	-80	35453	25853	5395	11943.5	8222
9.94253	13827	668	11.25	-16575.5	-1604.5	19056.2	-1999	9366	7620.5	-10301	-9331	21171.8	5632	31346.5	17411.8	5516.5	4729	13557.5
9.94231	8462	-1878	0	-23854	-8640	23224.8	-10155	9563	11504	-17705	-4390	13591.5	12944	21737	11826.2	7817.5	-876	16504
9.9421	14217	-3463.5	0	-22474.5	-11034	23429.8	-11422	13693.5	15529	-26326	-23	8152	20463	18253	16123.5	12828.5	-1851.5	11620
9.94188	21520	-4373.5	0	-12780	-8761	18444.8	-5530	18432	20060.5	-34596	465	11418.5	29935	20043.5	27098	21158	94	1422.5
9.94167	19889	-5776	0	-3480.5	-11122	12965	164	16151	23296	-43729	-3530	22246.5	37802.5	20017.5	35942.8	30565	4256.5	-5433.5
9.94146	13620	-8225	0	1056.5	-18252.5	10785.2	89	9962	25155	-49201	-7574	30713	34979.5	17595.5	38007	35831.5	10087.5	-2683
9.94124	11964	-10131.5	0	4370.5	-18453	8777.25	-5271	11879	27833	-43501	-8932	31100.2	20537	16611	35447.5	32795.5	12060	7635
9.94103	12711	-9275	0	7971	-8460	2555.5	-10607	23827	31018.5	-28245	-11468	29718.5	6869.5	17538	33306	22884.5	4102	17695.5
9.94082	9378	-5737.5	0	7959	407.5	-6026.25	-9098	34289.5	30256.5	-14717	-17684	34592.2	4481.5	19893.5	34827.5	12671.5	-9945.5	21384.5
9.9406	6905	-1573.5	0	4485.5	1863	-11387.2	1445	37220	22789.5	-10801	-21032	42716.8	9289.5	26036.5	38415	7819	-18526.5	19449.5
9.94039	14384	2260.5	0	4886	3588.5	-10568.2	14305	39600	12945.5	-14120	-14876	44701.2	11702.5	34940	38480.8	8078.5	-17329	18023
9.94018	27888	6501	0	12765	9685	-3546	19830	45009.5	8762.5	-18419	-5410	38941.5	10561	38353	31470	9380.5	-14556.5	21683
9.93996	35998	10694.5	0	22255	11024	8651	16162	45044.5	13551.5	-19910	-4873	33299.5	10602.5	30802.5	20748.2	9430.5	-18143.5	27386
9.93975	37484	11940.5	2941.5	27734	2459.5	22174.2	9544	35344.5	22519	-17257	-13053	33128.2	13084	17744.5	12886	8822.5	-24842	26921.5
9.93953	38005	8008.5	1666	30691.5	-5448.5	30537.2	4801	26332	27859.5	-11645	-16797	34686.5	16390	7186	9991.75	8005.5	-26483.5	17092.5
9.93932	34672	809	0	31587.5	-2848	30665.5	1875	27766	26136.5	-7091	-9687	31976.5	19890.5	223	9177.25	7191	-21125.5	5213.5
9.93911	21418	-4727	2483	24229.5	3999.5	25775.8	1207	33900.5	20318.5	-5805	-1142	24816.2	20987.5	-3065.5	8719.25	9164.5	-12837	885.5
9.93889	5982	-5283.5	14343	6552.5	4663	19443.2	4633	34327.5	15379.5	-4625	-1294	17802.2	15223.5	2752.5	10364.2	17383.5	-5217.5	3912.5
9.93868	3087	-1733.5	27323.8	-10222.5	795	11126	9958	29925.5	13548	-699	-6334	14774.2	5169	18758.5	15264.5	29742.5	-634.5	5586.5
9.93847	11759	3079	30604.8	-12725	-299.5	986	12417	27913	14721.5	2726	-6439	16343.2	1015.5	33210	21509.8	38635	-2223.5	1752
9.93825	16864	7743	22925	-1407	1481	-6075	12742	29295.5	19248	2011	-1496	20528.8	5896.5	34706.5	26414.8	39869	-10633.5	-1713
9.93804	13014	12161	14097.2	12606.5	3057	-6503.25	15699	30712	26533	232	276	24261.8	9641.5	28318	28490	37862	-20450	1471
9.93783	9976	15334	12069.8	22293	6261.5	-4252	19213	31718.5	31564.5	1134	-3609	25719	4440.5	26857.5	27275.8	39121.5	-24714.5	8895.5
9.93761	13469	16066.5	13766	28049.5	12085	-5146.5	14304	32152	28616.5	660	-6421	25775	-3108.5	31257.5	24010.2	43998.5	-22030	14051
9.9374	17304	15762.5	12430.5	30249	15028.5	-8142.75	-990	29217.5	20695.5	-6251	-3275	25973.2	-4212.5	32511.5	21702.5	48251	-15820.5	15254
9.93718	16997	16968	8792.25	28222	12597	-7876.75	-16592	23981.5	19317	-14423	1653	25655.2	-1878	29025.5	21254	49505.5	-8569.5	14718.5
9.93697	16076	18246.5	8325.75	25427	12399.5	-3547.75	-23287	22872	29764	-14367	1873	23159	-2326.5	27626	18470.2	48131.5	-855.5	11989.5
9.93676	15905	14789.5	10666.5	27033	20318	467.75	-22249	26425	41312.5	-6771	-2690	19061.8	-2230	28930	8883.5	44417	5727	4432
9.93654	12710	6559	10259	31878	29158	1224.75	-17702	25801	39136	-444	-7544	15295.2	3514.5	26294	-4909	39511.5	9491	-6603
9.93633	7380	1242.5	7276.75	33265.5	28624	-910.25	-9623	17418	23020.5	1820	-10761	11337	9931.5	20138.5	-14763.2	37403.5	11695	-15399.5
9.93612	5803	4821	9007.75	27916	19715	-5520	169	10825.5	6628	4193	-13375	4825	10576.5	19441	-15892.2	41194.5	14253.5	-18271
9.9359	7506	12888.5	17488.8	18958.5	10022	-11829.2	3719	13676	122	6520	-14154	-3237.75	10109.5	26123.5	-10845.2	48196	15059	-16759.5
9.93569	5489	16420.5	23581.2	10841	1503	-15970.8	-2928	19132.5	2175.5	4483	-9704	-7289.25	15057.5	30484.5	-4929.5	52898.5	10644	-14071
9.93547	-1457	13110	18681.8	6424	-7399	-14026.8	-11848	17983.5	8379.5	750	-1033	-3352.75	19696.5	26401.5	-1276.75	54079.5	3580.5	-11352.5
9.93526	-7238	7498.5	6820	7765.5	-13477.5	-8003.5	-13716	13697	17015.5	3064	4885	5484	15697	20129	-198.75	54727	1385.5	-8256.5
9.93505	-8988	3116	0	13908.5	-12454	-4335.25	-10563	14620.5	23955.5	9570	3374	11866.8	9040.5	19181.5	233.5	55511.5	6043	-4816.5
9.93483	-8271	1175.5	0	18498.5	-6662	-6173.5	-9879	19714.5	21968	8518	-1826	11861.5	11153.5	22290	3075	53207.5	10074	-1793.5
9.93462	-3629	4129.5	2564.5	15313	-930.5	-10870.2	-11232	23354.5	10806.5	-4034	-4721	8532	17947.5	25638.5	8979.75	46303.5	6777.5	-16.5
9.93441	5897	12285	4381.25	6309	4577.5	-14822.8	-8462	26868	639	-17263	-5997	7899.5	14669	29927	14240.5	37796.5	-261.5	648
9.93419	12623	18570.5	5405.75	-441	10154.5	-16741.5	-2213	33637.5	-429	-20476	-10140	11997	-390.5	35030	15088.2	30886	-3329.5	1979
9.93398	9353	15426.5	7511.75	-529.5	10953	-16061.5	-445	38909	3757.5	-15150	-16120	16450	-13088	35473.5	12590	25378.5	-3054	5539
9.93377	3716	6093.5	10590	3378	3834	-12317.8	-6669	36092	5433	-8007	-18590	15480.8	-13869.5	28243.5	10021.8	20169	-7287.5	9264
9.93355	8061	-128	14150.2	7029	-5301.5	-7083.5	-15532	28618.5	4519.5	-1357	-18065	8939.75	-6317.5	19380.5	7448.25	16411.5	-17646.5	8264.5
9.93334	17981	-2969.5	17617.2	8799	-9109.5	-3320.75	-20664	25194	5585	4014	-21177	2571.5	4472	16491.5	3384.25	16045.5	-24765.5	984
9.93312	18300	-10283	18474.5	8823.5	-8861	-1737.25	-20605	27438.5	8807	4116	-28361	562	17280.5	19261.5	62.75	18912	-20305.5	-7780
9.93291	8586	-21286	14224.8	8224.5	-9280.5	-51.5	-16544	31228	11791	-3545	-30056	55	27374	22799	1594.75	22985	-7992.5	-12544.5
9.9327	3337	-23987	6988	8986.5	-8980.5	3692.25	-10143	35199.5	16157.5	-14763	-20375	-4602	27863	25677	7508.75	26260.5	2117.5	-13428
9.93248	6407	-14116.5	2557.5	11122.5	-4825.5	9046	-4904	38581	23844	-22357	-7274	-13230.2	21160	28813	13088	27410	6156	-13565
9.93227	5721	-4254	4109.25	11065	-682.5	14198.8	-4788	35907.5	29576.5	-22253	-2116	-18117.5	17176.5	30358	15609.5	25992	7213	-12811
9.93206	-3378	-6348	10043	6590	-1960.5	17037.2	-9632	24203	25835	-14933	-4831	-11542.2	18122	27932.5	15636.5	23235	6524.5	-8845.5
9.93184	-9618	-15312	18091.2	1753.5	-5201.5	15697.8	-15040	11549.5	14559	-4734	-7211	5858.25	16549	23507.5	13385.8	21697	1628.5	-3238.5
9.93163	-6083	-18925	27266	2523.5	-3103.5	10545.5	-17606	8854	5934	2140	-6354	24212.2	9942.5	20826	9310.5	23073	-6356	-781
9.93142	-316	-15495	34795	8647	2563.5	5391	-17384	15980.5	5194	3238	-5876	32002.8	5048	20222	7148	26635.5	-11060.5	-2234
9.9312	2383	-11710	35914.8	14232.5	3048.5	4381.5	-14878	24070.5	7636.5	2738	-6633	26051	5071	20729.5	10063.2	29983.5	-9414	-3022
9.93099	7744	-9539	29459.8	15486.5	-3135	7537.5	-9143	28025.5	7503.5	4086	-5877	14476.8	4368	24562.5	14263.8	30735.5	-6325	-953.5
9.93077	16950	-5782.5	20400	13673.5	-7202.5	10985.5	-398	29088.5	5211	3001	-4949	8143.5	-475.5	33532	13120.8	27678	-7011.5	-305
9.93056	19593	-269.5	14066.2	11186.5	-2205.5	11274.2	8036	29245.5	4019	-5063	-8510	9182	-4915.5	42519.5	7622.75	21460	-9297.5	-4726.5
9.93035	11564	5281	10254.5	8737	9010	8139	12543	30879.5	4970.5	-14274	-15242	10814.5	-5647	42978.5	5682	14594	-8325	-9813
9.93013	4434	13298	5430.75	6225.5	19099	3919.75	13117	38002	7342.5	-15530	-17855	8494.25	-5877.5	33560.5	10371.2	10153	-5305	-7744
9.92992	6868	26231	0	3516	23814.5	1597.5	12911	50326	10328.5	-11951	-14192	6027.5	-7591	22152	16036	10078.5	-5516.5	1884.5
9.92971	10689	38840	0	1067	23169	2100	13824	59893	12875.5	-14930	-10465	8185	-7536	16369.5	17386	14415	-9320	10776.5
9.92949	5892	43032	0	1340.5	19402.5	2309.25	13811	60224	14527	-24751	-10890	12651.5	-4715.5	16727	15194	21202	-11493.5	12318
9.92928	-2911	38455	0	6837.5	15128	-2129.5	9829	54622.5	16358	-28491	-11811	14112.8	-3464.5	20503	11248.8	26724.5	-9653	9188
9.92907	-5958	30917.5	0	14958	11262	-10380.5	2953	49721	18432	-20242	-9567	12228	-5294	26930	5366	27517.5	-7222.5	8230.5
9.92885	-3609	22926.5	0	19301.5	6870	-15566	-1905	46456.5	18106.5	-10669	-7010	9865.5	-5508.5	34732.5	252	23717	-6241	10957
9.92864	-1880	13798	0	18851	2176	-12873	-2415	43370	14663	-10904	-7507	6861.5	-1815	38524.5	1664.5	19700	-3002.5	13187
9.92842	-1386	6590.5	0	19883.5	-324	-5721.75	-1924	41987	12962	-17767	-8702	2284.75	919.5	33305	9523.75	19916	5003	12544.5
9.92821	-79	5826	0	24454	520.5	-778.25	-3421	42115.5	16879	-21479	-7532	421	-1632	21693	15485.8	24342.5	12058	10925.5
9.928	332	9150	61.75	24380	2270.5	275.25	-3615	39000.5	21580	-19205	-6044	6557.5	-6961.5	11990.5	13912.5	28918.5	9982	8697.5
9.92778	-1746	9722	4354.25	13992.5	2081	142	1931	32418.5	19453.5	-14110	-6462	17295.8	-10527	8925.5	9376.25	29810	-466	2205.5
9.92757	-4072	6723.5	4399.25	1763.5	-413	-195.25	9675	30740	12007.5	-8242	-5261	22880	-11460.5	10498	8691.5	26553.5	-9976.5	-9332
9.92736	-5790	5699.5	2228	-889	-4483	-2180	10742	37843	7649.5	-3001	1035	20176.5	-10869	14116.5	11242.2	22001	-13135.5	-19128.5
9.92714	-8886	8614	2615.75	2913	-8985.5	-5901.75	3134	44331.5	8776	-1260	7888	16166.8	-9169.5	20242.5	12422.2	19837.5	-14531.5	-20486
9.92693	-10967	11571.5	7802.25	1022.5	-10668	-9992.25	-5378	41019.5	10694	-3477	8239	16759	-6689	27754	11634.2	20889.5	-19544	-16039
9.92671	-6331	12946.5	15308.2	-8130	-6451.5	-13966.2	-8624	32798	13242	-6016	4051	19063.8	-2645	31508.5	11400.8	21469	-24603	-13187
9.9265	2033	15733.5	20757.5	-14385	956.5	-16832.8	-9813	28751	21742.5	-6819	4220	17642	6177	29182	12578.5	17471	-22607.5	-12753
9.92629	2824	20146.5	21378.5	-13352.5	4601.5	-15646.5	-13966	26849.5	33583	-7793	10923	12233.5	20292	26105.5	15266.2	10683	-14809.5	-9966.5
9.92607	-6312	21350.5	17212.5	-11844	2032	-10124.8	-18076	20557.5	36217.5	-9318	15827	5605.25	32242.5	27664.5	20404.2	7742.5	-9568	-5669.5
9.92586	-13597	17265	10703	-14256	-2689	-6231	-15010	13408	24891	-8676	12055	-1162.5	33671.5	30578	26144	11089	-9540	-7039.5
9.92565	-10974	12397.5	5226.5	-15871	-6864	-9230.75	-4959	13643.5	11655	-6532	3145	-7387.5	27040	28421.5	27558.5	14796	-8246	-15115
9.92543	-5242	10958.5	2701.25	-13104.5	-12224	-14977.2	2985	19319.5	8731	-8063	-3553	-10938.2	22409	22610	24855	12807.5	-1834.5	-20704
9.92522	-4597	11372.5	2377.75	-9329	-18023	-14824.2	1221	21464	12595	-14470	-6661	-11090.2	22806.5	19601	26149	7901	3884	-16917
9.92501	-6094	10576.5	2281	-6385	-18948	-8298.75	-7892	18293	14151.5	-20172	-8708	-9523.25	21696	19331.5	35498.8	7601	3514	-8032.5
9.92479	-4806	9191.5	1048.25	-565	-13934	-3525.25	-15136	14803.5	15316.5	-21401	-8533	-5848.75	15733	16453	43670	13404.5	2356.5	-1025
9.92458	-4221	9049	0	8015	-9799	-4708.75	-14153	12272.5	22356	-20358	-2773	3121.75	10390.5	12560.5	39338.8	19595	8537	4043.5
9.92436	-7862	8988.5	0	11721	-11115	-6805.25	-6990	9455	29199	-17772	6132	16219.2	10092	15343.5	25620.2	21891	19027.5	9132
9.92415	-10137	6478	0	6944.5	-12985.5	-4600.5	-639	9983.5	23097	-9741	10276	25149.8	11456	23074	15874	21661.5	22744.5	11282
9.92394	-5268	1687	0	924.5	-9287.5	-1.5	497	16871.5	5834	3408	6382	23974.8	10412.5	22612.5	15138.8	21296	16319	8355
9.92372	2468	-2493.5	0	758.5	-2138.5	3131.75	-2371	23500	-5246	13080	480	17481.2	9090	9202	15946.8	20821.5	7977.5	5294.5
9.92351	6100	-3851	0	3185	2555	5581.5	-6005	21908.5	29.5	13133	-168	14664.8	11436.5	-3264.5	12696.2	20605	5144.5	5849.5
9.9233	6144	-3313	0	2037	3815	9801	-8587	16626.5	12665	8045	4211	16996.5	17229.5	-1106	9731	22794.5	6224.5	3934.5
9.92308	5462	-4138.5	0	-996	4237	14190.5	-8571	18267.5	19030.5	4687	8347	19176.2	23579	9411	11943.5	27762.5	6646	-6379
9.92287	1705	-7896	822.25	-662	4437.5	14679.8	-3950	26138	17135.5	2260	9162	19285.2	27925	12691.5	16090.2	32286.5	5715	-16952
9.92266	-6715	-10717.5	2279.25	1976.5	4129	10412	3891	29069	13210.5	-3249	6245	21292.5	27645	7280	16680	33233.5	4350.5	-14053
9.92244	-14228	-6015.5	0	1760.5	4829	5226.5	8538	21669.5	10654	-10130	-1557	27499	21374.5	5583.5	14573.5	30806	1900.5	1159
9.92223	-15856	6861	0	-1558	6911.5	4103.25	5283	9049	9144.5	-13360	-13918	34656.5	12396	13481	14359.5	27165.5	-1447.5	13227
9.92201	-14843	19118	0	-3187	7531	8382.5	-2150	-2322.5	9203.5	-12111	-24830	39133.5	6499.5	23405	17129	24270.5	-3736	13874.5
9.9218	-14795	20903	0	-448.5	5012.5	13224.2	-5910	-8115.5	11282	-9136	-27161	41146.8	5668.5	27746	20677.8	23561.5	-5045.5	10446.5
9.92159	-11166	11527	1316	4786	1466	11249	-3618	-3568.5	13352	-5547	-21833	41714.5	7687.5	27560.5	24040.5	24869	-7526	10574
9.92137	696	-1453	0	9183.5	-1370	1520	447	11472.5	13974.5	-1182	-16676	39283.2	11108.5	25920	27346.2	25090	-9987.5	10790.5
9.92116	14872	-10725.5	0	10094	-3933.5	-7375.75	1954	27184	15271	2436	-15633	32509	15414	22482	29088.2	21053.5	-8370.5	5820.5
9.92095	21190	-13047	0	6895.5	-4607	-7770	-382	33764.5	19437	3365	-15423	24332.5	17637.5	18136	27738.2	14317	-3868	-1271.5
9.92073	18233	-7597	0	2845	-235.5	-3985.5	-6306	34170.5	24619.5	1371	-13782	20153.5	15304.5	17294	25107	10066.5	-3755	-5345
9.92052	12398	3496.5	0	2649	6544.5	-6334	-13253	37049	26902.5	-3400	-13265	22205	11860.5	21551.5	24473.2	10963	-10245.5	-7608
9.92031	7818	13573	0	6015	7881	-15746.2	-15882	41261	24355	-10537	-14086	27676.2	12281	26411	25738.5	15487.5	-15170.5	-10377
9.92009	4433	15749	0	7493.5	2070	-22996.8	-12072	39298.5	17746.5	-16639	-11432	32401.5	14061	27402	25656.2	21987	-10984	-9855
9.91988	2934	9850.5	0	4942	-3125.5	-23508.8	-7469	32595	10030	-17163	-4709	34493	10164	25413.5	23109	29368.5	-1341.5	-2284.5
9.91966	4529	2002	3360.75	3253.5	-2284.5	-23207.2	-7760	30227	5816.5	-13058	-1490	33561.8	645	24029.5	21342	33428.5	5226	6810
9.91945	7171	-2505.5	13329.2	6606.5	467.5	-26675.8	-9048	33647	7380.5	-10429	-5390	28611.8	-6708	25224	23735.2	29042	7119	7488.5
9.91924	7120	-3049	15634.5	12132.5	361.5	-28748	-3970	34902	10422	-11379	-7586	19805.8	-7786.5	28726	28822.8	18499	8437	-1822
9.91902	3571	-1218.5	9386.75	15198	-178.5	-23163.5	4651	29705.5	8763	-10990	511	11892.8	-6218.5	32217	30740.2	11329.5	10114	-11951.5
9.91881	-758	2142.5	1884.25	16187	2164	-12245.5	6501	21609	4425	-6134	12313	11706.2	-5133	32042.5	24587.5	11746.5	9796	-12631
9.9186	-2107	7367.5	2084.75	17628.5	5306	-2245.5	96	13962	6635.5	-1132	14645	20168.2	-2764.5	27376	11531.5	12062.5	8309	-1347.5
9.91838	1882	15155.5	10344.2	18963	7208	4619.75	-4450	7735.5	18022.5	-782	7357	30103.2	1999.5	22903.5	-1057.25	4204.5	9090.5	15146.5
9.91817	8910	24275	17464.8	18831.5	10113	7698.5	-1198	5953	28556.5	-3266	2510	34943	6824.5	23173	-5410.25	0	12000.5	24973.5
9.91795	11455	29601	16846	18818.5	14277	3724.75	3611	10472	27971.5	-4296	5647	36244.5	10499	26004.5	-583	0	13341.5	19710.5
9.91774	4374	26274	13672.5	20488.5	15256.5	-7548	3226	15928	18360.5	-3631	9844	38521.5	14270	27213.5	6464	986	11435	2699
9.91753	-7067	17687.5	16400.5	22125.5	12103	-17819.8	217	15961.5	8991.5	-3281	8870	40453.5	17626	29800	8223	15308.5	7734.5	-13261
9.91731	-12403	14005	22401.8	22153.5	9644	-17815	-688	12842.5	4264	-3476	4786	37801	18520	40080	4507.75	24148	3857.5	-19200.5
9.9171	-8827	18904.5	20828.8	21789.5	8203.5	-8317	-990	12249.5	3570	-3965	455	32326.5	17885.5	54775	1155	25420.5	1765	-17877.5
9.91689	-2705	23468.5	9838	20803.5	1537	1840.75	-3259	13021	7885	-5467	-4970	28911.5	18132	61701	1480.25	21435	4456.5	-15964
9.91667	623	18836.5	1407.75	15875	-9543.5	6509	-4785	11883	17490.5	-7012	-10270	24202.5	18140	56469	2456	14461.5	11398.5	-13685
9.91646	925	9167	5113.5	7709	-13666.5	6103	-3074	12548.5	25799.5	-6179	-11696	8735.25	16128	49534	739	7595.5	15776	-7906.5
9.91625	-1832	4447.5	15043.2	3923.5	-6603	3518.25	-2105	18567	24853	-4369	-11206	-16147.2	15366	50978	-1048.5	4988.5	12217.5	-1487.5
9.91603	-7299	5570	19029.8	8484.5	294.5	1517.75	-6712	23259	17068.5	-6625	-15161	-33511.5	19161	55617	2253.5	7903	4942.5	-1506.5
9.91582	-10260	6167	15089.5	13454.5	-731.5	2510.75	-14923	19878.5	13622	-13492	-21531	-30114.2	22611.5	51140.5	10377.8	13052	1509.5	-8410.5
9.9156	-6166	5834	11151.5	9147	762	6526.5	-21000	15449	20061.5	-18596	-19366	-13612.2	18823	36785.5	17404	16781.5	505.5	-13744
9.91539	-899	10300	11860	-1247.5	15756.5	10676.2	-22035	19678.5	30196	-17883	-6132	-2476.75	11149	25044.5	19342	18882	-6279	-10689.5
9.91518	-4552	19145.5	13665.8	-5796.5	34936	13256.2	-17612	26558	35423.5	-15750	5521	-3313.5	8332	25016.5	17712.8	21099	-19751	-2346.5
9.91496	-15660	24396	12382.2	-596.5	41101	15687	-7954	24207	33737.5	-17810	5299	-6541	9192.5	31355.5	14831.2	24213	-30439.5	2893.5
9.91475	-23002	23015	8585.25	6115	33964.5	18178	3201	17272.5	27811.5	-22265	-621	-2026.5	4962	32585.5	10170.8	27988	-31622	1261
9.91454	-22826	21035	4341.25	6351	26581.5	17773	9109	19504	20266.5	-22827	-1456	9469.5	-3403	26022.5	4035	32050.5	-27535	-3795.5
9.91432	-21406	22486.5	0	1152.5	23598.5	13448.8	8230	27677.5	13522	-16509	1873	20638.5	-4611.5	20144	1097.5	35335.5	-24927	-7558
9.91411	-20498	22982	0	-3933	19490.5	7799.25	7232	25319.5	9474.5	-5408	2583	26709.2	3900.5	22972.5	6180	36009.5	-23420.5	-9661.5
9.9139	-15360	18089	0	-5604	14090	369	11325	12303	6734	5688	1944	28301.8	10699	32081.5	17951.2	33157	-19350.5	-12503.5
9.91368	-8938	10631.5	0	-3532.5	13426	-13532.5	16766	7573.5	2119.5	11091	5267	28741.8	8823	38493.5	29872.8	27829.5	-13813.5	-15559
9.91347	-11227	5213	0	274	16825.5	-31897.2	17739	18615	-3339.5	8315	9693	29759.5	5893.5	38371	36368.8	21936	-10681.5	-14761.5
9.91325	-20180	1294.5	0	1149.5	17656	-41686.8	15182	30261	-4278	2555	8459	28937.2	9110	36542	35858.2	16768.5	-9611.5	-9110
9.91304	-20287	-3957.5	0	-5058	15709.5	-33995	12953	30347.5	1044.5	2212	3723	23151.8	12536	37996.5	29695.5	12545.5	-7176	-4349.5
9.91283	-6895	-10128.5	1502.75	-16934	15677	-17765	10045	25824	6971.5	7804	2937	15526.8	7941.5	40739	21613	8578	-3908	-5688
9.91261	4806	-14271.5	0	-28242	15076	-8987	3236	24845.5	7235.5	10770	4618	14509	-1375.5	40093.5	17180	4294	-4636	-9193.5
9.9124	3646	-14127	0	-33562	7419.5	-10906.8	-5873	22373.5	1961.5	5581	143	22683.8	-6284	36160	19950	950.5	-10974	-6691
9.91219	-1068	-9068	0	-30591	-3481.5	-14853.2	-12429	14688.5	-4266	-3305	-10589	31312.5	-4078	32483.5	27387	1246	-17794.5	1393
9.91197	2085	-1092.5	0	-18938	-6085.5	-16251.2	-14513	11222	-7675	-9690	-17146	31315.5	1946	29874.5	32665.5	5791.5	-19211.5	5512
9.91176	7386	4852	4541.75	-1689.5	1618.5	-17661.5	-13111	19188.5	-6582.5	-14305	-13760	25409.2	8425	26599	30877.5	11156.5	-15156.5	918
9.91155	4653	5792	2673.75	12959	9903.5	-17978.8	-9000	29861	-1360.5	-20589	-6091	22560.5	11597.5	23294	22640.2	13259	-9427.5	-5360.5
9.91133	-1910	5548	0	17836	12583	-11766	-4253	32176.5	4313.5	-27020	-842	23773	8144	22776.5	12708	11559	-3476	-4834.5
9.91112	-2711	9338.5	38	15336.5	12126.5	-793.5	-3565	28463	5918.5	-28499	1432	21829.2	1998	25546.5	6402.5	8047	3792	2012.5
9.9109	-730	14294	4784	14477	9190.5	5117.75	-8966	25609.5	4333	-22541	476	14041.5	3235	29710.5	5833.25	3851.5	10326.5	9978
9.91069	-5292	12463.5	5298	18303.5	478	1790.5	-15517	21881	5655.5	-11199	-6712	6764.5	14592	34399.5	7850.75	0	10289.5	17145
9.91048	-14914	3574.5	0	19738	-10430	-3944.5	-16637	14474.5	11951	306	-18406	6079.5	25838.5	38818.5	7214.5	0	2226	22963.5
9.91026	-20625	-3284.5	0	12153	-12567	-5206.75	-11883	10482.5	16626	6207	-25902	10971.2	26696.5	39153	3112.25	0	-5955	24361.5
9.91005	-21303	-2569	0	-1007	-2437	-2867.25	-6168	17435.5	13054.5	5484	-24141	17572.2	18563.5	32102.5	78.25	4613.5	-5443	20553.5
9.90984	-22905	1099.5	0	-10659	10037	62.5	-3638	29269	3863	4425	-18313	24296.2	9034	21605	916.25	9554.5	1820.5	16786.5
9.90962	-26249	2126	0	-12575.5	14295	3342.75	-4968	33077	-3268.5	8303	-15192	30522	2439	16595	2523.5	14301.5	5813	16349.5
9.90941	-26952	1932.5	0	-9736	10206.5	5786	-7815	25836	-5830	11762	-13908	34710.8	380	20912	1665.5	18361	2291.5	13898.5
9.90919	-24504	3745	0	-6467	4162	4623	-7911	15865.5	-6894.5	5415	-10215	35796.8	3418.5	29735.5	626.75	17622.5	-2806.5	4817.5
9.90898	-21655	6475.5	0	-3960.5	1847	1676	-3228	11502.5	-7501.5	-8619	-4362	33449	7206	36780.5	2606.25	9607	-4258.5	-3606.5
9.90877	-17794	8593	0	-1066	6752	2588.75	1682	15056.5	-4868	-17848	776	27061.2	5291	40572	5439	625.5	-5294	-723.5
9.90855	-11415	11897	0	3029	18252.5	7014.5	546	23933	1821.5	-16840	4840	18317	443	42385.5	5620	0	-10104.5	10411.5
9.90834	-5539	16390	1377.25	7319.5	29157.5	7648.5	-4056	32167	8957	-12685	7697	13512.5	3753.5	42187.5	5153.5	6369.5	-14679.5	15671
9.90813	-2790	17009.5	1758	9528.5	31811.5	2407.75	-1794	34761.5	12767.5	-10908	5976	17462.2	17361	38804	7612.75	9423	-11623.5	9331.5
9.90791	776	10964.5	3155.75	8641.5	27806.5	-834.25	10960	34067.5	12678.5	-8021	-2196	25309	28997	31923	10149.2	5321.5	-1056	98.5
9.9077	8692	3737.5	4376.75	7017	25474	3899	25146	36744.5	10155.5	-2098	-11898	26989	30358.5	22981	7322.75	2865.5	9072.5	-3798
9.90749	14960	2476	2514	8570.5	27793.5	12049.8	31296	42287	7328.5	1565	-16676	20772.5	28889	15340	1354.75	8553.5	12062	-4760
9.90727	10708	7218	83.5	14344	29614.5	16648.2	30154	42313	6763	1048	-17029	15679.8	32213	12385.5	42	15225.5	7759.5	-7275
9.90706	-2572	13247	3620.25	21373.5	26675.5	17216.5	26393	34341.5	9426	2125	-17841	18630.5	33317.5	13312	4718	13144	620	-8914.5
9.90684	-14166	18126.5	12447.5	26608	20420	14940.5	20371	27326.5	12612	5391	-18960	26034.2	23925.5	13190.5	8965.25	5052	-3780.5	-5911
9.90663	-17024	21562.5	15706.5	30066	14195.5	6767	13090	28731	12564.5	1533	-14999	31197.5	12101.5	10549.5	10036	828	-2208.5	-771.5
9.90642	-13573	22117.5	5928	32718.5	11159	-8468	11192	34586.5	9083	-11984	-4987	33481	11077	11412	12435.2	2268.5	2775.5	1989.5
9.9062	-10250	19246.5	0	33061.5	14470	-24136.8	17755	37708.5	4952.5	-21966	4108	35317.2	17636	20147.5	17868	3268.5	4646.5	2825
9.90599	-10855	15802.5	0	28523	22483	-33038.5	23848	37651.5	1529.5	-18124	6252	35138	17868	29434.5	20667.8	1749	740	4161.5
9.90578	-13856	14111	0	20135.5	26143.5	-35291.2	18863	36894.5	-1570	-10134	4222	29079	10370.5	27410.5	17416.2	742	-4834.5	4345
9.90556	-13898	12502.5	0	13215	19374	-33122	5406	35016.5	-2740	-13409	4823	17534.8	7546	14109.5	13479.5	0	-8583	177.5
9.90535	-8523	9636	4441	11877	9267.5	-24562.8	-4819	32682	1165.5	-26716	8916	5795.75	14940.5	2433.5	14985.5	0	-12988	-7017
9.90514	-3719	8568	8382.25	14158	6562	-10083.8	-6784	34237	9239.5	-36967	10800	-804.75	24565.5	1719.5	20410.5	0	-20264	-12573
9.90492	-7184	11784.5	6643.25	14399.5	9079.5	1084.75	-5293	40525	15179	-39178	7064	-359.75	29890.5	8302.5	24819.5	0	-25997	-14010.5
9.90471	-15875	15608	0	9994	6139.5	1140.75	-5037	45713	14035.5	-37883	1505	4909.25	33303	14477.5	26912	0	-25107.5	-11752
9.90449	-18410	14873.5	0	3595.5	-2706.5	-4321.25	-5986	46141.5	7984	-34205	-710	9657.5	35497	18741.5	27255.5	0	-19672.5	-6260
9.90428	-11522	10497.5	0	-1535.5	-6861	-4634.25	-7489	45102.5	3057.5	-25768	-345	9478.25	30474.5	23006.5	24812.8	0	-13958	1934.5
9.90407	-4637	7206	912.5	-5573	-2808	-651	-9381	44193.5	1943.5	-16906	-1656	5509.25	16943.5	26378.5	20085	0	-6066.5	10709.5
9.90385	-4824	6030	4764	-9871.5	963	-1816.25	-9273	38410	2577.5	-15858	-4277	2806.25	4661.5	27221	17069.8	0	7003	17950.5
9.90364	-7195	4423	2206.75	-13233	-82.5	-8786.5	-4468	25850	2784	-22353	-2634	3768	2608.5	27109	17462	9173	19485.5	23822.5
9.90343	-5232	1939.5	0	-13511.5	936.5	-11528.2	3738	14008	3200	-28169	5648	6591.25	7746.5	27785	17344	12457.5	22147	29142
9.90321	-1150	309	2662	-11537	8826	-5956.75	11592	9357.5	4911.5	-29029	15534	10272.8	11533	27215	14057.5	10657.5	16262	32394
9.903	128	-913.5	6283	-9908	17232.5	-638.25	16831	8122	6637.5	-27059	21355	15897.2	11895.5	23042	11566.2	11147	12076	30351.5
9.90279	-850	-3236	7142.25	-8400.5	19498	-2777.25	17951	4804.5	6448	-23563	23628	21640	12287	17872	13785.5	15712	12859.5	21551.5
9.90257	-1578	-4330.5	8696.25	-4337.5	18697	-7302	13401	2733	5484.5	-18418	25185	22561.2	12873	17161	16933.5	20435.5	10763.5	8858
9.90236	-1968	244.5	13408.5	2046.5	19983	-5743.25	5526	7560.5	7283	-14616	24219	18525.2	10002	22435	14547.8	24206	1137.5	-787
9.90214	-851	9703	15219.5	6293	21233	1235	738	15799.5	12587	-14753	16999	16785.2	4031	28943	7269.5	29381.5	-8667	-755
9.90193	4005	17018.5	7854.25	5241	18528	6441	1103	18759	17441	-15310	5882	22423.5	1629.5	30043.5	2129.25	35594.5	-9718.5	8136.5
9.90172	9010	16756.5	0	1221.5	14354	6265.75	712	14725	18452	-12710	-1689	30863	7518	23596.5	3928.75	39764.5	-3721	16080
9.9015	7144	10838.5	0	-697.5	13201	2430.25	-4655	9812	17490.5	-11482	-2664	34625.5	16603.5	14660.5	11625.2	41247.5	377.5	14132.5
9.90129	605	5377.5	0	2135.5	13626	-2662	-10290	8863	17780	-16923	-1582	33607	18213	10985.5	21284.2	41208.5	-2807.5	4721
9.90108	295	4276.5	0	8166	10969	-6984	-11002	11318.5	17496.5	-23010	-3104	33442	8891	14497	28809.8	38516	-11811.5	-2901
9.90086	8646	6909.5	6031.5	13171.5	4877	-7959	-10165	14340	12534.5	-18674	-6067	36623	-2160	19313	31550.8	32214	-21427	-6216
9.90065	14792	9842.5	11089.2	13580.5	-777.5	-5325.25	-12727	15732.5	4882	-4366	-6853	40387.8	-3437	20407	30194	26213.5	-25155	-10270
9.90043	11870	9431.5	12225.5	10330.5	-3447	-2923.25	-15253	15511	1793.5	8645	-4665	41403	4793	20560	27172.2	24892.5	-18301	-14799
9.90022	6601	3970.5	8639.5	8687.5	-4076	-3276	-11764	16900	5490	14355	-1134	38123.2	11101.5	24072	21742.5	25576	-2995.5	-11843.5
9.90001	5496	-5040.5	4443.5	11569	-5261.5	-2301.25	-4215	22743	10403.5	16487	2080	30598.8	7288	27509	10588	22769	11676.5	-1076
9.89979	4538	-13111	4368.5	14706.5	-8765.5	5817.5	1948	29553	13207	16814	3086	22196	-2968.5	24286.5	-4576.5	18714	17423.5	3732.5
9.89958	-80	-14606.5	7014.75	12808.5	-13341.5	19518.8	7706	29837	18115	10724	-30	19255	-11072	16413	-15002	20839	13676.5	-6969.5
9.89937	-4121	-6402.5	8445.75	8613.5	-15267	30500.2	16170	21942.5	27072	-2897	-6293	24324.5	-13682	12800	-13981	27918	6287.5	-22131.5
9.89915	-6308	7949	10432.2	8910.5	-13107.5	33422	23050	12243	31412.5	-16814	-11195	31434.2	-12786.5	15961	-3789.25	28430	1765.5	-23945.5
9.89894	-13570	18577.5	17535.5	12071	-10107.5	30324	22123	6144	21185.5	-24142	-11190	32652.5	-10026.5	19353	9037	16770.5	3230.5	-12730
9.89873	-25842	17543	27286.5	8810.5	-8657.5	24750.8	16651	3385.5	-669	-24848	-7414	27829.8	-5355.5	19128.5	20017.5	3176	8817.5	-4781
9.89851	-29534	7617	32053.5	-1799.5	-5645	16707	14319	3768	-20452.5	-21335	-3507	23281.8	826	19282	25632.5	1600.5	12946.5	-7626.5
9.8983	-17563	-361	30996.8	-6852	1510.5	6144.25	13745	9413.5	-27540.5	-14370	-1250	22357.2	7546	22406.5	23127.2	12991.5	11655	-11426
9.89808	-2760	144.5	31101.5	2998	7844	-2957.25	7669	18059	-20673.5	-6267	265	22531.8	14022.5	24438	16353.5	26436	7010.5	-6571.5
9.89787	1119	5390.5	34693.8	18185	7304.5	-6650	-2422	22260.5	-4911.5	-2314	2570	21272	18936	22896	14908.5	33037.5	3849.5	3262
9.89766	-783	9195	35362.5	21552	3666.5	-6950	-7080	20003.5	9930	-5493	6119	19458.5	20936	22102.5	21327.8	32625	3130.5	10366
9.89744	2599	11694	29712.8	10683.5	6428	-8843.5	-4197	18943	11942.5	-12819	9615	18126	20992.5	24909	25687.5	29032	2392.5	14212.5
9.89723	7476	16217	23818	-902.5	16905.5	-12294.2	-2061	24899.5	-1631.5	-18369	10385	15911.8	21640	26506.5	19802.5	24921	1712	16773
9.89702	3515	21272	22547	-3103	26735.5	-12432.5	-5981	32417.5	-17320.5	-17736	6646	11220.8	23210.5	22603	9964.75	21581	3766.5	15527.5
9.8968	-6083	21552	21094	293.5	29584	-7964.75	-12151	32143	-19348	-10262	-432	4750.5	24126	17689.5	7129.25	19767	7657	9237
9.89659	-9378	15890.5	14540.2	1843.5	26179	-3543	-16241	22550.5	-9753	174	-8120	-519.25	25226.5	18695	10874.8	19541	8330.5	4465.5
9.89638	-4828	9050.5	8507	1938	18612.5	-1677	-18615	9841	-4389	7597	-14999	-706.75	29058.5	24978.5	13412.8	20729	3862	8080.5
9.89616	-1063	5009.5	10881.5	5117.5	8603.5	1620	-19483	742.5	-9524.5	9947	-20664	5820	33720	30519	14364.2	23231	-1375	17056.5
9.89595	-1779	2586	17892.2	10627	1105.5	8686	-17622	-1110	-14928.5	10853	-23696	14394.8	32791	32132.5	19562	25891.5	-2704	22978.5
9.89573	-3423	-730.5	18785.8	13020	291.5	13109.8	-15543	3644	-12258	13110	-23023	15933	23755	30287	27803.2	26499.5	-382	23716.5
9.89552	-4199	-3496	12108	10677.5	1585.5	7706.75	-17736	9629	-6888.5	14313	-20647	7131.5	11840	25565.5	31003.2	24525.5	2599.5	23720.5
9.89531	-4849	-1339	6992.5	8586.5	-3157.5	-3587	-22384	11857	-5761.5	12227	-19399	-3079.25	3240.5	19449.5	27404	22568	4128	25132.5
9.89509	-4484	7367.5	8136.5	11372	-12213.5	-9705	-22498	12532	-5656.5	9388	-18276	-2398	-824	15242	23812	23356	3113	25843.5
9.89488	-3857	18543.5	9331	16691	-15378.5	-7179	-16304	17201	-1915.5	7768	-14204	10134	-1416	13773	23936.5	26346.5	-258.5	25311.5
9.89467	-7026	25888.5	4538.5	18479	-9485	-2606	-9149	24203.5	1178.5	4615	-8469	23249.2	1256	11792	24483.5	28707	-3189	25415
9.89445	-12753	27196	0	15774.5	-2246	-89.75	-4653	25929.5	-1442.5	-578	-6322	27304.8	5602.5	8517.5	24086	28636	-2657.5	25292.5
9.89424	-12629	26345.5	0	14287.5	1074.5	4477.25	-1440	21239.5	-4847.5	-1434	-8800	23923.8	8519.5	9034	26449.8	26364	-14	21485.5
9.89403	-5120	28553	0	17584	4514.5	13270.2	1203	17319.5	-1702.5	5125	-9914	20728.5	10192	16391.5	32317.5	22917.5	281	14302
9.89381	-911	34714.5	0	21084	11963.5	19268.5	2327	17556.5	5289	10207	-4420	21195.2	13887	25253.5	36871.8	19408	-3108	8936.5
9.8936	-5747	41407	0	19290.5	20224.5	15456.5	4013	17647.5	8640	4229	5843	22280.5	18854	29124	37770	17235.5	-7300.5	8866.5
9.89338	-10108	44804.5	6760.75	15404.5	24889	5599.25	9246	16131	8722	-7918	15893	19389.5	19829	29178	38224.5	17955.5	-10459.5	12216.5
9.89317	-6086	42704	15848.5	16472.5	25026.5	-892.75	15156	17790.5	10687.5	-13856	23434	11425.8	16426	29390.5	39706.2	22277.5	-13636	15609.5
9.89296	-1124	34853	21814.8	20522	19670	-1144.75	16216	22959	12914.5	-12322	27425	1838.5	15627	27415	38729.8	28269	-16860	17547.5
9.89274	-2860	24847	22128	17943.5	8019	475.25	13353	24728	9953.5	-13203	25206	-4768.25	20499.5	18549	33355.2	30733.5	-18153	17021
9.89253	-4499	19994	20778.5	7310.5	-4802	1003.25	11369	21515.5	4627.5	-20752	16001	-7562.25	23784	6116	26509.8	25451	-17347.5	13170
9.89232	98	24271.5	23813.5	-144.5	-10994.5	1422.75	8883	21034	5359.5	-28545	4807	-9608.5	18754	-762.5	20904.5	16187	-16339.5	8098.5
9.8921	1259	31839.5	31952.8	3136	-11093.5	1542.5	1142	26259	11687.5	-31417	-1973	-11872.8	10173.5	711	16704	13876.5	-14610	6093
9.89189	-9107	33126.5	38897.8	9132.5	-12677	-1356	-8057	29199.5	13851.5	-31621	-3648	-10335.8	7470	4765.5	15160.5	24047	-9127.5	7814
9.89167	-18726	27670.5	37678.2	6217	-16618	-7633.75	-9279	25413	8352	-31758	-4276	-2632.5	11821.5	7359	17641.2	37653	175	8402.5
9.89146	-13781	24401.5	28034.8	-3807	-15419	-13141.5	-3211	22907	3265	-31046	-5764	5950.75	16947.5	11578	20164	40887.5	9055	3532
9.89125	-4409	27496	15774	-9671.5	-7933	-13400.8	-1234	28176	4975	-30249	-5716	9263.75	18940	20723.5	16635.2	32749	13869.5	-5390.5
9.89103	-8627	29514.5	5227	-7047.5	-4018	-8112	-7715	34447	9264.5	-31889	-1832	10846.5	18664	31838.5	8830.25	25045.5	13937.5	-13785
9.89082	-20440	23119	0	-1586.5	-9426.5	-1362.5	-13811	33479	10117	-33971	4788	19529.8	17325.5	39358.5	4985.25	24926	9262	-18636
9.89061	-18836	12839	0	1980	-16700	1749.75	-13033	29114.5	9100.5	-30998	10914	34138.2	15739.5	41880.5	7010	26923	893.5	-18674.5
9.89039	-2610	8131.5	0	4648	-17218.5	-75.25	-11186	28795	10305.5	-22279	13534	41547	15748.5	42614	8306.5	25118.5	-6600	-13167.5
9.89018	9092	9075.5	7489	7599	-12815	-2196.75	-14833	30510.5	12289	-12432	11181	33815.2	17288.5	44846	6526	23187	-8835	-3766.5
9.88997	8563	7139.5	22371.8	9634.5	-9026.5	971	-19911	29008.5	11196.5	-3949	5111	19987.8	16501	48629	7804.25	25936.5	-8022	4604.5
9.88975	7360	-1377.5	23981.2	10489	-5634.5	8245	-18679	27215.5	7630.5	3318	-696	15058.2	11262	51186	13875.2	29159.5	-9834	7934
9.88954	12010	-10418.5	11851.5	10692	-911	12973.5	-10246	30368.5	4886.5	6117	-2462	22062.2	5788.5	50105	16087.8	26646.5	-13751	7096
9.88932	15142	-13355.5	0	8656	2314	13196	1455	35029	3174.5	529	-144	31274.5	5300.5	46623	9719.25	21800.5	-13283	5558
9.88911	13936	-10654.5	0	3785.5	1785	14521	12855	34326.5	231.5	-9164	2554	33970.2	8865.5	45161.5	4496	22929	-6504	4780.5
9.8889	16165	-6422	0	1290	672.5	19408.5	18862	28717.5	-4176	-13692	1920	30510.8	11589.5	48707.5	11060.2	30104.5	806.5	4180.5
9.88868	22872	-2541	0	7044.5	1430.5	20344.5	13706	22438.5	-7954.5	-12004	-1973	25930	10946	55381.5	24303.5	35528	3931	3797
9.88847	23503	717	0	18031	992	10284.8	-438	15430	-9425	-12258	-5138	23557.2	7168.5	60371.5	31024.5	35265.5	4088	4088
9.88826	14161	1900	1187	24792.5	-2570.5	-5271.75	-12127	7958	-7912	-17903	-4246	24072	906	60370.5	29077.8	32244.5	3096	4116.5
9.88804	5209	101.5	12719	23646	-4965	-14839.2	-13329	6425.5	-3313.5	-22063	-1761	26785.2	-5333	55727.5	27237.5	28330	698.5	2591.5
9.88783	5264	-1850	23911.2	19833	-2651	-16331.8	-7739	14159.5	2971	-19099	-4086	29904.2	-6724.5	49756.5	28491.2	21648	-909.5	82.5
9.88762	10763	755.5	28007.8	18003.5	1142.5	-17233	-2632	22476	8463	-13527	-12601	31341.8	-1278.5	46480.5	25813.8	12568.5	2189.5	-1715
9.8874	15149	8848.5	23517	16468.5	2383	-21155.8	527	21779	12455.5	-12913	-19788	30569.5	7165.5	47383	16317.5	5352	7859.5	-2106
9.88719	16359	17369.5	13932	12546.5	2336	-23342	2824	16281	16429.5	-17701	-18709	29287.2	13828.5	49945.5	9206.25	2522.5	8797	-1401
9.88697	12913	19744.5	6918.25	7547	3175.5	-19916.2	2657	16684	20661.5	-22045	-13210	30069	17375.5	50779.5	14276	3317	4094.5	-438
9.88676	4717	14309.5	9825.25	4158	3477	-13409.2	-452	23067.5	23077.5	-20678	-11831	34040.5	17520.5	49419	28211.2	8204	1499	-1413
9.88655	-789	5689.5	20805.5	3452	2302	-7564.25	-2923	26822	22596.5	-12612	-13538	38781.5	13837.5	46670	37827.5	18566	4602.5	-6452.5
9.88633	4581	-61.5	28173.5	5752.5	1750	-3566.5	-3116	26124.5	20827	-1406	-9040	38886	9890.5	40996.5	35101.2	30736	6767	-13080.5
9.88612	15942	-663	24245.2	10123.5	1965	-2846.25	-4347	27294	19435.5	7318	2765	31152.2	12067.5	31279	25339	37033.5	2827.5	-14382
9.88591	20323	2412.5	15778.8	12672.5	242	-7021.25	-7316	31948	18960.5	11103	10520	19926.5	19854	22415.5	20291.2	35513.5	-1977	-7219
9.88569	15340	7401	13941	10441	-1983.5	-13212.2	-6426	33843.5	20853	12303	7194	14368.5	23504	22198	24908.2	33219.5	-1325	2622
9.88548	10072	13537.5	18234.5	7203.5	695	-15388	731	29287.5	26290	11714	927	18603.8	16583.5	31631	32349.5	36327.5	1549	7608.5
9.88527	7938	19406.5	19388.5	9573	7327	-12027	7090	22413.5	31425.5	5079	1632	27014.8	4983	43735	32643.2	41383	-54.5	7659.5
9.88505	3315	22541	15216.8	16743.5	9685.5	-7029.75	6087	19232.5	29071	-8450	5510	31262.5	-2004.5	52726	24478	40313.5	-5419.5	7075
9.88484	-3981	21519	12646.2	20546.5	5537.5	-2433.5	1950	22010.5	18571.5	-19769	2866	29378	-3663.5	58290	15412.2	31594	-8655	5861
9.88462	-5817	17214.5	14304.5	17086	2340.5	3025.25	2450	28709.5	9477.5	-20425	-5177	25235.8	-4873	59979	11346.2	22630.5	-7297	1791.5
9.88441	-261	11701	14569.5	11550	2700	7092	6290	33526	10671	-15530	-9422	21536.5	-6820	55344.5	10857.5	21386	-2907	-910
9.8842	4220	6947.5	11289.8	9126	-1713.5	3963.25	5959	30520.5	18922	-15697	-8249	17317.8	-7358.5	46656	11133	27600	2536.5	5320
9.88398	2249	4279.5	10404.8	8040.5	-13802.5	-5656.5	205	21030	23377	-19683	-8275	11614.2	-5925.5	41739	13566.5	32874.5	6289	18455
9.88377	-2036	3586	14189.8	5504	-20869	-11861.8	-4348	13866.5	19672.5	-17362	-10254	5804.75	-1978	43577.5	19396.5	29748.5	5958	26470.5
9.88356	-4058	3289.5	14882	4307.5	-12357.5	-7560.5	-3250	14363	14374	-7987	-6656	1613.75	6648.5	45652.5	24207.8	20361	4681.5	23306.5
9.88334	-3662	2364.5	6826.75	8016	2141	2507.25	659	18592	15387.5	-1675	4187	-991	17881	41994	22065	13862	8619.5	16715
9.88313	-299	1642.5	0	13681	6078	8902.25	2596	22160.5	22194.5	-2320	11933	-3211.75	23330.5	35045.5	12895.2	14645	15613.5	15562.5
9.88291	5879	1739	0	14835.5	85.5	8187.75	1689	26621	27042.5	-3058	7240	-5824.75	18724.5	28833	1581	17290	14813.5	17672.5
9.8827	8612	1276.5	0	9682	-1387.5	2380.25	559	31405.5	23837	-1097	-5877	-8211.75	11416.5	21973.5	-7945.75	15871.5	2625	16987.5
9.88249	2759	-645	0	2268	6618.5	-6595.5	1559	29147	14625	-3280	-15129	-8385.5	10858.5	13756	-13530.8	13194	-10487.5	15168.5
9.88227	-4220	-2120.5	0	-2726.5	14118	-16631.5	4135	18098.5	7357.5	-12265	-12920	-4751	16498.5	9662	-12463	15175	-15684.5	16732.5
9.88206	-499	-1625.5	0	-3183.5	13316.5	-23901.5	5437	10197	7158.5	-19996	-1451	1366.5	21569	12925.5	-3913.5	20146	-17584.5	17878
9.88185	12012	-1364	3696.25	474.5	8455.5	-26396.5	3975	15486.5	10756.5	-20993	10658	5909	23342.5	17171.5	7470.25	21477	-21618	11097.5
9.88163	21173	-3320.5	8245.25	5079	6699.5	-25548.8	1913	26142.5	11367.5	-21200	14650	5502	22544.5	16257.5	15668.2	18735.5	-20897	-849.5
9.88142	24116	-3991	9739	5839	9099	-21237.2	1895	28446	7825	-26831	8516	-258.5	18265.5	15684	20596.8	17938	-8667.5	-6104
9.88121	27883	1419.5	10498.8	894.5	13182	-10541.8	3057	23867	4926	-34043	-746	-9607.5	11277	24157	26488.8	21164.5	5306	241
9.88099	32012	10565	11062.8	-5703	17115	4445.5	3221	23937	4944.5	-36251	-5140	-19038.2	7114.5	38053.5	33327	24253	6519.5	10247
9.88078	28045	15945	9114	-7791.5	18926	13903	2907	28953.5	4258	-33216	-5674	-22807.5	7995.5	45044.5	35584.8	25537.5	-1553	15362.5
9.88056	17522	15320.5	5764.5	-3631.5	16908	11665.5	2659	27704	62.5	-26938	-9241	-16391.8	7236	41081	30927.2	28598	-2339.5	16342
9.88035	12828	13632.5	5619	2936	12292.5	4203.25	-970	17291.5	-5056.5	-17126	-16191	-2799.25	-29.5	33791	25028.2	34270.5	9075	17419
9.88014	16872	13711.5	8686.5	7545	7646	1509.5	-10069	8388	-8091.5	-6756	-18928	8418.25	-6609	30056.5	24507.5	37594	21509.5	17904
9.87992	18591	12162	9068.25	9796.5	2842	3817.75	-17959	9141.5	-9579	-3598	-14357	11699.5	-3269	29524.5	28260.8	35776.5	26831	15094.5
9.87971	12566	6947.5	4560.5	11851	-3374	4958	-15572	16239.5	-8997.5	-9407	-9138	11524.8	6653	30120	29480.2	32729	28112.5	10910.5
9.8795	6698	2453.5	1225.25	13480	-8806.5	4383	-5048	24069.5	-2529	-15156	-8404	14385.2	13098	31196	25048.5	32579	27555	9881
9.87928	5682	3169.5	4189.5	11175	-9407	6349	1716	31590	8688.5	-13271	-7346	19067	14702.5	30697.5	19512.8	34318.5	21353.5	12573.5
9.87907	3248	7438.5	9217.75	4392.5	-5125.5	9678.75	-1233	37161	13813.5	-7544	-485	20581	17019	26822	18944.8	35411.5	10464.5	15099
9.87886	-2883	11109	9058	341.5	-245.5	8590.5	-8230	36337	4129	-5006	7050	20040.5	19602	22993.5	22928.8	35131.5	3604.5	13827
9.87864	-4255	12908	4869	6799	1827	3677.75	-12687	28902	-13530	-5943	5741	22774.5	17379.5	24618.5	24938.8	32228.5	4432.5	7824.5
9.87843	2199	12885.5	5102.5	19632	1192.5	2415.5	-13874	21376.5	-23550	-8427	-4112	28085.8	12500	31183	20956.5	25300.5	6195.5	-1479
9.87821	5521	10028.5	13624.2	24810	-94	6988	-11611	19675.5	-19985	-14299	-12218	29433.8	12407	37767.5	15344.8	17537.5	3668.5	-10159.5
9.878	-2781	4855	24088	16724	423.5	10112.8	-4669	23919	-10172	-22712	-11320	25549.5	16933.5	42758	15423.2	14719.5	421.5	-13094.5
9.87779	-15458	238	27247.8	7180	4042.5	5964.25	2767	30720.5	-1345	-25288	-3990	22966.5	18864	46751	21184.2	16470	-630	-8783.5
9.87757	-21409	-3314.5	20568.5	9242.5	8507	-1959	3408	35509	6912	-17074	3341	24841.5	17115.5	46030	24659.5	16442	-4176	-2202.5
9.87736	-20544	-8576.5	9245.75	18715.5	9305.5	-7459.25	-963	33640.5	15884.5	-6175	7303	25116.2	18074	36603	20793.2	13107.5	-13535.5	-170
9.87715	-18733	-14811.5	159.5	21523	5699.5	-9978	-326	25156.5	22511.5	-2946	7451	18412.8	23059.5	24185	14502	12067	-22564.5	-4124
9.87693	-17037	-15583	0	14806	2780	-12067	6781	17294.5	24264.5	-4643	3966	9343.75	25046.5	20233	13369.2	14951	-23533.5	-9527.5
9.87672	-13776	-7594.5	0	8327	4960.5	-13225.5	9113	16494.5	22643	-746	-2198	6164.25	19596	26888.5	16746.5	15735.5	-17712.5	-11940
9.87651	-10215	3380	2040.75	6602	10281	-10860.8	849	19928.5	19006.5	9847	-9003	9624.75	10110	34949.5	17454.8	12821.5	-12160.5	-11349.5
9.87629	-8050	10275	5687.25	3446	13727.5	-4745.75	-8341	21066	12815	17093	-14610	13861.5	898	38010	12956.2	14746.5	-10085	-10227.5
9.87608	-7060	13657	8189.25	-3450	12983.5	2772.75	-8961	20456	6160.5	14381	-18150	14940.8	-6766	38910.5	8865.75	26771.5	-9358	-9386.5
9.87586	-8327	17648	10490.2	-5784.5	8308	9165	-5710	23167.5	3529.5	6278	-19291	12957.2	-10834	39958	10284.5	40589.5	-7432	-7318.5
9.87565	-12811	21761.5	14254.8	1608.5	583	12450.2	-6589	28363	4483.5	1040	-18356	8669.25	-8799.5	37227.5	14838.8	45450.5	-3656.5	-3281.5
9.87544	-15307	23354.5	19467.5	10841	-7167	11853.5	-8699	30644.5	3327	1653	-16779	4179	-3004.5	29372	17230.5	41732	1080.5	406.5
9.87522	-8946	24339.5	23411.8	12156	-10143	9177.5	-5619	30383.5	-803	5213	-16204	4901	1078.5	23062.5	16993.5	35293.5	4641	519.5
9.87501	2675	28051	23169.2	7120	-7695	7258.25	297	33282	-839.5	7060	-16911	14258.8	2027.5	23390	17646.2	26799	5508	-2705
9.8748	7705	31581.5	19302	3525.5	-5815.5	6462	4327	39582	6885.5	5194	-17498	26856.5	2099	25577.5	19847	16656	4815.5	-5171
9.87458	2247	28615	15885	3795.5	-9577.5	5663	9678	42522.5	15521	2771	-15920	32843.8	1741	22269	19814.8	12362.5	3597	-3862.5
9.87437	-5790	19282.5	16481	5559	-15536	6618.25	19287	38698.5	17821.5	4689	-11146	29481.8	1353.5	13678.5	15282.5	18246	-908	-255.5
9.87415	-10241	10784.5	21041.2	8143.5	-15671.5	12662.8	25008	32581.5	16646.5	10157	-4714	23262.5	5180.5	5158	9931	23771.5	-11234	2891.5
9.87394	-12514	7983.5	26702.5	11425.5	-7435.5	22048.2	18549	29573	17994.5	12271	-270	20151	14648	-181	9929.25	15760	-22851	5734.5
9.87373	-12308	8909	29733	12688	3300	27911.2	7351	30768.5	19329.5	7306	-181	19178	21299	-1007.5	17274.8	0	-27922.5	9172
9.87351	-5641	10198	26360.8	10950.5	8519	27165.8	5229	35062	13885	-265	-3312	17000.5	17131.5	5017.5	28030.8	0	-26158.5	10698
9.8733	4350	11766.5	14659	10206	5595.5	24203	10958	40570.5	3138.5	-5471	-7714	13368	9292.5	17042	36374.2	0	-25027.5	7186
9.87309	7537	14361.5	0	12590.5	-500	22797.2	10835	43773.5	-4162.5	-10206	-13783	9204.5	12198.5	27344	38991.2	1381.5	-28214.5	866
9.87287	2569	16279	0	13214	-2182	20005.2	962	42588	-3943.5	-17761	-21549	3461.5	26118	28454	36301	6721	-30857.5	-2976
9.87266	688	15051	0	8230.5	2311	12801.5	-7583	40123.5	471	-24856	-26642	-4465.25	36611.5	22639	31573	12547.5	-27678.5	-4276.5
9.87245	8702	10987.5	0	3056.5	6808.5	5630.5	-6945	40885	6422.5	-25790	-24271	-11571.8	35717.5	19170	29020.8	18601	-18869	-7861.5
9.87223	19301	7554	0	4815	6042	4780.5	-2649	44752	14073.5	-21478	-16845	-13664.2	30226.5	22817.5	30484.8	17061	-6654	-13650.5
9.87202	23356	8070.5	8404.25	10648	3490.5	8392.5	-2245	49261	20349.5	-17995	-11662	-9837.5	26658	29277	32939	6725	6224.5	-14553
9.8718	21081	11925	19347	12101	5414	8920	-4846	54789	19541.5	-17955	-10136	-2649	21681	31784	31115	0	12993.5	-7863
9.87159	16139	14800	27999.5	8495	10610.5	3998.5	-6661	61539.5	12231.5	-18931	-6086	4945	12485	28836.5	23853	200.5	7110	-1633
9.87138	9284	14215	30800.8	7070.5	13687	-1697.25	-8446	64595.5	6444	-18815	2905	11353.2	4904.5	24831	15996.2	6162	-6251.5	-3441
9.87116	2862	13670.5	25844.8	10948.5	15361.5	-4704.5	-12149	59108	7165	-17571	9389	16270.8	4610	24926.5	12475.2	9033	-12059.5	-8372.5
9.87095	1425	17996.5	15370.2	15651.5	19354.5	-6146.25	-15722	48147.5	10855	-15090	5825	20091.5	8736.5	29766.5	12838.5	10960	-4159.5	-6192
9.87074	3428	25508.5	4621.5	17981	21213.5	-6304.25	-15792	38657.5	12976.5	-12296	-5180	22558.8	11548	34817	14166.5	15349.5	5806	3055
9.87052	2364	29876	0	20277.5	13227.5	-2461.25	-12322	32130	14579.5	-13008	-15464	21850	11213.5	35186.5	16953.2	16722	4278	9625
9.87031	-519	29971.5	434.5	23903	855	5511	-7817	26098.5	17592.5	-19439	-21238	16827.5	7469.5	30516.5	23673.2	9035	-6892.5	9062
9.8701	3924	31445.5	6072.5	25294	-614	12659	-4040	21672	19161.5	-26470	-23018	10391.8	509.5	23836	32244	0	-16077	7227.5
9.86988	16236	36680.5	9476.5	21469.5	10371.5	14821.5	-988	21602	15738	-25613	-20596	8034	-4512.5	16914.5	36047.2	0	-18231	8994.5
9.86967	24064	39952.5	7570.75	14700	16535	12986.2	1962	23283.5	9177.5	-15359	-14904	12093.2	-157.5	9777.5	32162.5	5815.5	-17312.5	10677.5
9.86945	19674	35946	4135.25	9063.5	7405	9542.25	3873	21773	4066	-3779	-11435	19651.5	12406.5	4077.5	25899	19199	-17107	7663
9.86924	10113	26636.5	4882.5	5993	-4242	4661.75	1244	17977.5	1375.5	273	-14565	26694.5	22881	2737	24556.2	27971	-18013	2690.5
9.86903	4428	15715	10347.2	5373.5	-1792.5	-541.5	-8040	16507	-1204.5	-4170	-20459	31498.2	25261	5405.5	28798.2	29516.5	-19979.5	1209
9.86881	2330	2946	16268.8	7830	11526.5	-1722.5	-19184	17712	-4398.5	-10981	-21992	33090.2	23797.5	7802.5	32691.5	24949.5	-21183	3091.5
9.8686	1276	-10542	19439.2	13454.5	20493.5	3226.75	-23683	19088.5	-6364.5	-14652	-18893	30187.5	23008.5	6870	31204.5	17956	-16253.5	4373
9.86839	2959	-17934	19639.2	20043.5	19750	9446.5	-19872	21419.5	-5518	-15995	-16395	24102	21068	3943	25516	14053	-2886	4181.5
9.86817	6039	-14618.5	16935.5	24473.5	14830.5	10877	-14452	25563	-1741	-20098	-15531	19754.5	16911	2207.5	20807.5	15510.5	11669.5	4682
9.86796	3381	-5594	11467.2	25281	8589.5	8807.5	-11059	26687.5	4159	-28582	-12023	20907.2	14604	3670	19929.2	18383.5	17303	5890.5
9.86775	-6464	1381	5958.25	23655	40	9393.75	-5290	20528.5	10266	-35637	-4298	26158	15770	8675	20051.8	18525	12802.5	5497
9.86753	-14947	5035	4177	22597	-7268.5	13478.2	4125	11976.5	14031	-34409	4266	31407.8	16001	15348.5	16335	17582	5193.5	3413.5
9.86732	-16532	6782	5943.25	24377.5	-7419	14678.8	8486	8280.5	14374.5	-26186	11248	33745.5	13424	19740.5	8922.25	18583.5	-440	2561.5
9.8671	-15738	3999	7080	27614.5	-698.5	8867.75	1947	7679.5	12023.5	-18975	16918	31367.8	12547	19945.5	4377.75	19656.5	-3928	4893.5
9.86689	-15991	-4287.5	5152.75	27859.5	8135.5	865.5	-6664	5107	7381	-16872	20074	23752.5	15193	19452	8480.75	18312.5	-4778	9307
9.86668	-13132	-10422	2029.5	22550	16404.5	-847	-5539	4724.5	660.5	-16030	18737	15150.2	16442.5	22371	19033	18321	-1800	13314.5
9.86646	-6368	-7095.5	145.25	14293.5	21083	6712	2301	13874.5	-5374.5	-12714	15372	13737	14459.5	26429	28150.5	24519	1727.5	14684
9.86625	-3581	238	0	8034	15997	19055.5	4318	27198.5	-6803.5	-9880	14594	22351.2	14871.5	26075	30603	33016.5	-559.5	12365.5
9.86604	-8084	408	789	6413	974.5	28924.2	-2391	30919	-4357	-12293	14915	33190.8	19425.5	21806.5	27304	35276.5	-9997	8244.5
9.86582	-11485	-6508.5	3646.75	8892	-11573.5	31209.8	-9046	22760.5	-3495.5	-19317	9858	37224.5	20183.5	19705	21778.8	31627.5	-21006.5	6733.5
9.86561	-7826	-10322	6778	12791.5	-9611.5	25824.8	-9906	14128.5	-6048	-26393	-1105	36095.8	12695	21409.5	16806.8	31702.5	-28043	9566.5
9.86539	-3649	-7511	7039.5	13602.5	2720.5	18237.2	-7305	11795.5	-6521.5	-30987	-9986	37836	5628.5	22119	14298.5	39508	-29705.5	12191
9.86518	-5276	-5010	4409	7761	11531.5	15387.5	-2946	11089	-1010.5	-33409	-11225	42625.2	7793	20122.5	14624.5	46414.5	-25775	9230
9.86497	-7094	-6353.5	3161.25	-1889	11092	18551.2	4589	9269	4743.5	-33833	-8453	41574.8	13498.5	20149	15057.2	43084	-16022.5	2858
9.86475	-2459	-5828	6258.25	-6587	5813.5	21554	13184	11770	2538.5	-31539	-6996	30858	11590.5	24076	11673	31702.5	-3734.5	1023
9.86454	3756	75.5	11247	-1452.5	-793.5	18443.5	17693	20831.5	-5601	-26101	-5890	18693	3137	26671	3821	21184.5	4560.5	6788
9.86433	4183	5589.5	13651.5	7831.5	-7781	11419	17552	30058.5	-9096.5	-17839	-1499	14527.5	-1276.5	25649.5	-4966	15410.5	5546	14207.5
9.86411	1847	5187	11984.8	12238	-10502	7799.5	15648	35158	-2944.5	-8611	5878	17866.2	1839	27937.5	-10259.8	12224	2096.5	16352
9.8639	3369	2239	7761.75	10722.5	-4283.5	9743	11203	39300	6378.5	-2433	12806	22426	6216.5	38429.5	-9065.5	10459	-1609	12781
9.86369	6585	2660.5	3160.5	9410.5	6640.5	11211	3434	43316.5	10571	-2369	15952	25707.8	8056	48717.5	-555.5	10996.5	-4381	6768.5
9.86347	5507	5854	423.75	11496	13505	6676	-93	41496	9489	-6216	12184	28499.8	10179	46203	11884.2	12202.5	-5831	246.5
9.86326	1440	7206	1024.75	13798	15014	-738.75	8804	32510	8863	-8728	866	28924.5	13322.5	31425	20649.5	11115	-3992.5	-4423.5
9.86304	-1190	5336	3632	13071	16001.5	-3421.25	23113	24224.5	12163	-8637	-11422	23869	12636.5	17848	20900	9701.5	1751	-2469
9.86283	-4996	2533.5	5138.5	10336.5	16292	-128.5	26026	21541	17957	-9537	-15047	14889.5	5680.5	15471.5	17483.5	13577.5	7791	7028
9.86262	-15370	1134.5	4923.5	8026	11006	1895	14252	18955	22937	-13123	-10031	6848.5	-2328	21784	19908.8	22390	9319.5	15537
9.8624	-29096	2483	5458.25	6862	1106.5	-2717	2673	11867.5	24688.5	-16455	-7574	1230.75	-4237.5	28447	29956	27527.5	5273.5	13233
9.86219	-35921	6661	7843	6529.5	-6218	-8848	1857	6387	22639	-17214	-14073	-3848	1473	30194.5	39547.2	23650.5	-1400	2604.5
9.86198	-30417	11355	10352.2	6529	-8137.5	-7271.75	4215	10006	18318	-16758	-21197	-7066.75	10021	26466	41953.8	17629.5	-7114	-3323
9.86176	-16847	14184	12540.8	6143	-8833	1601.25	-936	19541	14122	-16162	-18989	-3263.75	14476	20057.5	39397.5	19722	-9812	2068
9.86155	-4163	17154.5	16167	6134.5	-11135	6677	-10513	26353.5	10848.5	-14162	-11497	8349.5	10545.5	15802.5	37279.2	28754	-9192.5	10841
9.86134	452	24581.5	19837.2	9737	-12645.5	1392.75	-14948	28339	7279.5	-10960	-9462	19817.5	126.5	16847.5	36322	33709	-6601	12762.5
9.86112	-3637	35191.5	17861.5	18900.5	-10403	-6091	-13390	29292	2749	-8993	-12684	22106.5	-9638	21358.5	33944	29673	-4275.5	9228
9.86091	-9524	41037.5	8306.75	30551	-3698	-4177.75	-12017	30413	-1268	-7892	-11313	15504	-12761.5	25536	29338.8	24002.5	-3585.5	9032.5
9.86069	-10145	36576	0	39872.5	6491.5	4752.25	-13105	29691.5	-3067	-4222	-2816	9472.75	-9441	28890	23790	24345.5	-4145.5	14591.5
9.86048	-7391	24857.5	0	45701.5	15641.5	7516.75	-14419	27487	-2959	1459	3974	12519.5	-3687	32921.5	19069	28490	-4796	19712.5
9.86027	-8275	12523.5	0	48561.5	16355	254.75	-15117	26537	-2307.5	3378	2748	23942.5	1884.5	36051.5	17893	30878.5	-4744	19580.5
9.86005	-12540	2633	0	45512	7229.5	-5491.75	-14656	26989.5	-1024.5	-213	-2309	35344	6674	35067.5	22323.8	32225.5	-3860	15948.5
9.85984	-12643	-5095.5	0	33357.5	-2641.5	-955.75	-9397	25622.5	2437.5	-2863	-4840	38836	9958.5	31233.5	29411.2	35602	-2884	11815.5
9.85963	-6876	-10693	0	16513.5	-4905.5	5723.25	2524	20234.5	8346.5	455	-4219	33695.8	11385.5	29389	32517.2	38249.5	-3208	7015.5
9.85941	-2432	-13812	0	4607	-3226.5	1971.25	15387	12836	14042	5057	-2273	26301.2	12251	30270	29476.8	35891.5	-5348	1198.5
9.8592	-3295	-14923	0	690	-5469	-9883.75	21204	8266.5	16192.5	3392	527	24289	13545	29226.5	24916.8	31900	-8208	-3473.5
9.85898	-5503	-14404	87.75	-1619.5	-9984	-16689.8	19313	9437	14594	-4080	2403	30084	13917	24169	21713.8	32801	-11277.5	-5396
9.85877	-7242	-12358.5	6232.5	-6711.5	-9886.5	-14125.5	15587	13271.5	12332.5	-10444	325	38999.8	11842.5	19325	15914.8	36345	-16215	-6033.5
9.85856	-12527	-10554.5	14742	-9333.5	-6535	-10545.8	13812	13201.5	11433.5	-11627	-4106	43508	8313.5	18450.5	4952	34216.5	-23357.5	-7033.5
9.85834	-20792	-11936	20081	-2980.5	-6901.5	-11707.8	12679	7564	10186	-8927	-5036	40200.5	5203	19475.5	-4464.75	26775	-27776	-7599.5
9.85813	-23933	-16584	20087	9281	-10156.5	-13233.8	10225	2560	6826.5	-4772	-1764	32873.5	2851.5	19815	-3695.75	24022	-23671	-6830.5
9.85792	-18866	-20443	17024.5	18385	-9113.5	-10600.5	6786	3741	3941	-800	-1335	27919.8	1733.5	22419	5498	29091	-13585.5	-5639.5
9.8577	-12823	-19757.5	11881.8	20687	-3939	-6167.75	3535	8560.5	5148.5	1219	-7765	26670.5	4205	30908	12933.5	31867.5	-7897.5	-3839.5
9.85749	-11397	-15147.5	4070.25	19799	-2326.5	-2101.5	1081	12115	8121.5	405	-14939	24427.2	10973.5	41406.5	13069.5	25058.5	-11944	1412
9.85728	-11475	-10187.5	0	18484.5	-5837	4262.75	-306	15576	6490.5	-2001	-15301	18320.2	17386.5	45562	9694.5	17003	-18424.5	10509.5
9.85706	-10439	-7565.5	0	15035.5	-7631	12270.8	-493	22092.5	156	-4328	-9965	13149.5	17659.5	41279	7921.5	19754	-17655.5	17248.5
9.85685	-11332	-7558	3490.25	8616	-4980.5	13713	750	28808	-2328.5	-5746	-4366	15492.8	12840	34713.5	7951.75	31114.5	-11796	14493
9.85663	-13824	-9068	7166.75	2914.5	-3278.5	4330	3734	31511.5	4427.5	-5074	947	23478.2	10315.5	30882.5	8332.75	38196.5	-11813	3086
9.85642	-11216	-11298	2969	1554	-5885	-6884.75	7047	33197	13706	-1531	8047	27742.8	13884.5	27984.5	10169.2	35029.5	-21269.5	-9200
9.85621	-2127	-14483	0	2805.5	-9878.5	-8269.5	6668	37907	15339.5	2053	13871	23291	18070	23419.5	14934.8	27353	-30775	-17096.5
9.85599	5378	-18241.5	0	2069	-13634	-946.25	560	39681.5	9661.5	1057	13118	15026.2	15665	20076	20739	21931.5	-30582.5	-21585
9.85578	6185	-19348.5	4538.75	-1562.5	-19059.5	4351	-5815	30060	5880.5	-4085	7757	9261.75	8635.5	21918.5	23689.8	20021	-22275	-24123
9.85557	3649	-13993	9702	-4150	-24346	2319.75	-3391	14976.5	8411	-7346	5992	5400.75	6503.5	26642	22425.5	21234.5	-14313.5	-22772
9.85535	-1177	-3725.5	9542.75	-2426	-23709.5	-3371	9289	10475	12180.5	-5778	10763	772.75	13379.5	28402.5	19709	25727	-11027	-16395.5
9.85514	-12674	4248	6613.5	1917.5	-16896.5	-8897	22868	20625	11619.5	-4254	15376	-921.75	21976.5	26670	19133	30918.5	-10765.5	-7980.5
9.85493	-27780	5519.5	3617.75	4699.5	-10800.5	-13584.8	27477	32982	7467.5	-8597	12442	6602.75	23924.5	26621	20815.5	32286.5	-11397	-269
9.85471	-34301	3950.5	948.75	4524	-9555	-15317.8	22757	38060	3085	-17726	2762	21148.8	21249	30082	21465.5	29364.5	-12229	8000.5
9.8545	-28913	5211.5	0	3723	-10448	-11555.8	15487	39437.5	-116	-25263	-6590	31983.8	21326.5	31547	19176.2	26290	-12274.5	17211.5
9.85428	-22795	8350.5	3059	4462.5	-10745.5	-5821	11030	40666	-1270.5	-25858	-9878	32558	23787	25977.5	16119.8	25109	-11368.5	21944
9.85407	-22046	8404.5	8917.25	5958.5	-10675.5	-5293.75	10016	36744.5	1065.5	-18456	-6992	27922.5	21761.5	16759.5	14238.8	22983.5	-11989.5	17279
9.85386	-17730	4213.5	11780.8	6335	-8852.5	-10283	10551	25935	5972.5	-7173	-2610	26912.8	15912	12202	10587	17440.5	-15836	8260.5
9.85364	-4413	-1701	7777.5	5904	-3287.5	-13114.5	10441	17381	9721	99	-1949	31071.2	16010	15763.5	1689.75	10361	-19882.5	5527
9.85343	7299	-8291	0	7202.5	1896.5	-9363	8715	17802	10343	-1248	-5500	34549.5	24464	22588	-8433.75	5146.5	-20135	10658
9.85322	8174	-14991	0	11817.5	-502	-3260	6911	20900.5	9536	-6004	-8268	32214.2	29208	25026	-10909.2	3221.5	-17882.5	13399.5
9.853	5272	-17800.5	0	17933.5	-9435.5	654.25	7409	19410	8864	-5139	-6426	24524.5	21026	19930	-3836.25	4660	-17123.5	6696
9.85279	6458	-12824.5	0	21732.5	-15766	4287.25	9710	18297.5	7802.5	1240	-3381	15988.2	9031	11387.5	4872.25	9215.5	-16945	-2593.5
9.85258	4538	-2621	0	21800.5	-15301	10455.8	10604	25119.5	6574	4087	-5386	11689.5	8129.5	7207.5	8932.5	15412	-12741	-3726.5
9.85236	-7843	6680	0	21655.5	-12958	16609.5	8746	34776	6406	-392	-11770	14211.2	17271	11347	11331.5	21085.5	-5052.5	2819
9.85215	-20297	13118	0	25872	-12312	19155	6317	36151	5614.5	-5626	-14547	21101	22438	19396.5	16424.2	25687	-355	8187.5
9.85193	-18936	18338	0	32987.5	-10333	19658.5	5400	29947	817	-6536	-8781	25822	18113	23847.5	21027.5	29833.5	-1447.5	9620
9.85172	-8826	21908	4309.5	35268.5	-5383	21647	5668	28273	-5500	-6897	1306	23981	13131.5	23882	20066	32620	-3676.5	12371.5
9.85151	-5033	22927.5	18222.8	28381	-1664	24381.5	6308	37398	-4658	-10103	8506	18896.2	15199	25668	16653	32425.5	-3187.5	17328
9.85129	-8659	24788	26093.2	18683	-1935.5	24569	7009	50345	6582.5	-11807	10884	18435.8	20938.5	31651.5	18987.2	30507	-2327	17004.5
9.85108	-8691	30550.5	23196.8	16171	-3212.5	21916.2	6494	57109.5	19243.5	-8430	11239	25156.8	23496.5	35463	29044.5	30225.5	-3092.5	7858
9.85087	-2438	35538	13567.2	21461	-2900.5	18607.2	3812	54693.5	22723	-4959	11779	31608.8	21007.5	31745	40667.5	31947.5	-1767.5	-1650.5
9.85065	1933	32837	5520.75	25541.5	-2326.5	15191.2	1670	45804	18215.5	-6650	12644	27783.5	14926	25678	47832.2	32208	4343.5	-1713
9.85044	465	24463.5	3029.5	22595	-1827.5	11118.8	4076	33937.5	15011	-9685	13328	12965	6968	25795.5	49352.2	28951	10002	5442
9.85022	-2725	18043.5	2683.25	16705	439	7873.25	9592	22506.5	16399	-8040	12345	-2014.75	-254	30657	46263.2	24021.5	8430	9623
9.85001	-4578	14205.5	0	14035	2874	7595.25	11661	15224.5	17151.5	-3909	7265	-5552.5	-4881	30919	39845.5	19110	1322	6685
9.8498	-4986	7863.5	0	14783.5	1680	9523	7423	14249	14266.5	-3273	-1849	2707	-8229.5	23811	32268.2	13106.5	-3812	1516
9.84958	-2218	1049	0	16244.5	-139	11145	1317	18168.5	11753.5	-5927	-10438	12147	-10761.5	17001	25202.2	5954	-4025.5	-1097.5
9.84937	4078	1934	0	17918	5842.5	11818.5	-2132	22651.5	12308.5	-7740	-13828	13054.2	-8418	16480.5	18183.8	1663	-2797	-1457
9.84916	9087	9602	0	19032.5	19526	12038	-3766	23712.5	11361	-8783	-12591	6201.5	-1	18571	11557.8	3798	-3134	-667
9.84894	10441	12657.5	0	16214	28924.5	10402	-4948	21043.5	4304	-11755	-10771	-36.25	5558	17866.5	9385.75	9687	-4074.5	2286
9.84873	13999	6678	0	9012.5	26047	5161.25	-2973	17584.5	-4790.5	-15628	-10045	233.75	-642	16710.5	15176	12604	-3058	7369
9.84852	23136	692.5	0	3349.5	18035	-1778.75	3754	14983	-7405	-17484	-8983	5713	-12562.5	20943	25822.8	9416.5	2218	11882
9.8483	29219	1142.5	9061.5	3742	16140	-6185	10398	11187	-1740.5	-17572	-7383	12301.5	-16034	29733	34081.5	3724.5	12147	13946
9.84809	23383	1668	15038.5	6185	20369.5	-7030.5	11394	4522	5576	-16928	-7176	18662.2	-9194.5	35608.5	36584	1470.5	21394.5	14526
9.84787	11476	-3767.5	13811.2	5054.5	22196.5	-7526.25	8725	-2117	8800.5	-13949	-8204	25623	-3464	33921	35834	5019	20501	14724
9.84766	5982	-8892.5	11946.5	2967	17720.5	-10223	8707	-4534.5	9010.5	-9089	-6816	31960.8	-4226.5	27890.5	35194	11492	7091.5	13722.5
9.84745	8170	-5733.5	12504.8	5933	10881	-13846	12221	-2752	9013.5	-8153	-846	33834.2	-4769	23727.5	35547	15820.5	-8114	10294
9.84723	9380	1829	10195.2	11754.5	5820	-15546	13951	508.5	7071	-14605	6324	29204	-1625.5	23762	36025.8	15474.5	-13747.5	4118
9.84702	5797	5219.5	2994	12485	1897.5	-14025.5	10885	4645	415	-22840	8918	21091.5	-941.5	25745.5	34423.5	12796.5	-12903	-4264
9.84681	1414	4496.5	0	7607	-3810	-10085	6082	9924	-7076	-25563	4637	14760.8	-4320	27265	27663	12288.5	-16825	-11981
9.84659	-249	4192	5494.5	5460	-11735.5	-6102	3192	13878	-6807.5	-23485	-4205	12246.5	-2491.5	28630.5	15346.5	15270.5	-25988	-13117
9.84638	1529	2153	13660.2	10309.5	-17348.5	-5013	1957	14627	3294.5	-21323	-13765	11606.5	9056.5	30715.5	2257.25	18210	-29210.5	-4095
9.84617	6919	-5930	11125.5	16403	-13801.5	-7545.75	1132	15846	14048.5	-18936	-20371	11561	20168	31624.5	-5603	17200.5	-22505.5	9487.5
9.84595	12740	-14843	0	17418	297.5	-10314.8	2308	22130	14897	-13675	-20441	13803	20516.5	28313	-6789	13208.5	-16362	16174
9.84574	12507	-14496	0	14497.5	16345.5	-9040.25	8086	30795.5	5673	-7425	-12636	18527.8	13878	21889	-4239.5	11355.5	-19350	11018
9.84552	6017	-5110	0	11466	23087	-4001.75	17884	34608.5	-5013	-4083	-1187	20351.5	9190	17983.5	-1295.25	14744.5	-25306.5	1032.5
9.84531	2215	2590	0	8262.5	18312.5	58	27463	31385.5	-10662	-3376	5987	13251	6818	19753	-198.25	20091.5	-24568.5	-3953
9.8451	5763	2845	0	3166.5	9089.5	-68.5	31910	24661.5	-11457.5	-3205	5204	-484.75	3240	23406.5	-1920.25	20846	-19540	-2526
9.84488	9231	1528	0	-2856.5	1485	-2619.5	28320	16863	-9238.5	-4083	1551	-10684.5	986.5	23708.5	-4596.25	15055	-19468	-1040.5
9.84467	6386	5571.5	1575	-7455	-3950	-4246.25	17107	9091.5	-3671.5	-5694	2765	-10326.8	3359	21222	-4738.25	8833	-25015.5	-4509.5
9.84446	3402	13283.5	9381.5	-9163.5	-7083.5	-4303.5	2814	5556.5	4973	-4360	9432	-2769.25	5518	20130.5	-2433	10115	-28310	-11454.5
9.84424	7024	18480	13373	-6567	-6200.5	-4186.5	-6940	9676	13146.5	69	14688	3864.5	1144.5	21183.5	-1487	19406	-26255.5	-16605.5
9.84403	11458	19267	13991.2	700.5	-2775	-4402.5	-6250	16974.5	16476	1075	13895	6042.75	-6509	21848	-1638.5	29450.5	-24032	-16082
9.84382	8541	19222.5	17942.8	8625	-1578	-4428.5	3349	20447	13317	-3840	10604	5986.75	-9588.5	22016	3633	34533.5	-24735	-9999.5
9.8436	1996	21973	26517	11506.5	-3606.5	-4473.75	13020	21491.5	5371	-6686	10737	6851.25	-8047	23801.5	16408.2	36231.5	-24038	-1149.5
9.84339	-528	26845.5	33008	10093	-4440	-5332.25	14656	25901.5	-3396.5	-1745	14204	10432.5	-8493.5	25857.5	27301.5	37729	-18437	8491.5
9.84317	-1105	29598	31919.5	11658	-1676	-6531.25	8781	30589	-8892.5	2909	15883	17265.8	-13329	23723.5	26700	36969.5	-12712.5	18753.5
9.84296	-4737	27211	25004.2	19253.5	1410.5	-6125.5	2811	26148.5	-10613	-2727	12861	25110	-18761.5	16935.5	18798.2	30714.5	-14297.5	27717.5
9.84275	-7007	21602.5	17352	26543	1834.5	-2912.25	1932	13276.5	-12567	-13886	6622	29254.2	-21587.5	10791	15978.5	22585.5	-22864	30145.5
9.84253	-1723	17306	11851.5	27095	1589	1834	4359	4369.5	-17248	-18530	-658	28246.8	-21198	9615	22129.5	19887	-29673.5	23819.5
9.84232	6280	16277.5	8505.5	23340	4070.5	5635.25	5772	6097.5	-19994.5	-16008	-7394	27272.2	-16625.5	12624	30406.5	22583	-26893	15506.5
9.84211	8960	17946	5883	21417.5	9577	7739.5	4845	11834.5	-14489	-15112	-10549	31109	-7606	17488.5	35578.2	22830	-15077.5	14061
9.84189	8654	23226	2253.5	21960.5	15730.5	9567.75	2795	14969	-3462	-17446	-7642	35584.8	2622.5	23028.5	38861.8	17529.5	-1522	17567.5
9.84168	11027	32705.5	0	21776.5	19260	11289	842	18329.5	2631	-16909	-1890	32171.2	10212	26740.5	40479	14068	6731.5	15070.5
9.84146	11911	40377	0	20917.5	17689.5	9604	504	25214	-780	-13785	-445	20744	14895.5	24955.5	36794.5	19045.5	7644.5	3351
9.84125	4937	36736	0	21606	12979.5	2226	3381	31490	-6559.5	-15093	-5335	11134.2	17961	18646	26999.2	27362.5	3944	-6256.5
9.84104	-4617	21603	1577.75	22393	11955	-5737.75	7840	33228.5	-6686.5	-20935	-10814	10428	18604.5	15058.5	15669.2	29136.5	169	-2992
9.84082	-7830	7048	13434	19683.5	18302	-5011.25	8894	33922	-2684.5	-23503	-12281	14637	15783	19966.5	6986.25	23631.5	-686	8359.5
9.84061	-7441	2804.5	29545	14090	26198.5	5484.25	4632	37740	-669.5	-20603	-12634	15608.5	11230	30767	2004	18750	266	14679
9.8404	-10926	5087	45048.5	9797.5	27566	14306.8	-401	42330.5	-1459	-18255	-15649	11143.2	7549.5	39845	1686.75	18283	-1653	11560
9.84018	-14879	5432	51828.2	8163.5	22842	10887.8	-2123	43791.5	-1757	-19037	-18186	5001.75	5469.5	42484.5	6273.5	17708	-9480.5	5177.5
9.83997	-11606	3921	46639.2	6967	17554.5	-86.75	-3800	42854.5	-1625	-19665	-15314	1054.5	4715	39451.5	11724	13544.5	-19443.5	661.5
9.83976	-5442	5746	35982.2	5531.5	11874	-4690.75	-10810	41579.5	-4180.5	-20825	-9516	872.5	4998	34365	13538.5	9226.5	-23604.5	-2436
9.83954	-6364	10024.5	27749	5448	3199	1510.5	-21229	39506	-9464	-26884	-6985	3659.5	5693.5	30955.5	13823.5	8062.5	-18715	-4183.5
9.83933	-11860	11744.5	21311.8	6050	-3645.5	9171.25	-27916	36661	-14414	-34301	-6694	5497.75	7968.5	31123.5	17393.5	6381.5	-9512	-2370
9.83911	-11193	12032	12793.8	4382.5	-730	10309.5	-28540	34823.5	-18227.5	-33352	-2057	2229.25	15768.5	33784	21679	0	-1762.5	2251
9.8389	-4154	16610.5	6462.75	874.5	8865.5	8546.25	-27134	33257	-22343.5	-24544	6009	-3812.25	28730.5	36633.5	19395.2	0	3912	5460
9.83869	273	24480	10110	516.5	13541	10396.2	-26277	29299	-24906.5	-20429	7036	-4111.75	36409	39141.5	11525.8	0	8375	5680
9.83847	1220	27270	19707.2	6366	10911	14695.5	-24353	24942.5	-20408	-26471	-4341	4742	29262	41465	7785	0	8938.5	5103.5
9.83826	6024	21233	21148.8	15280.5	10540.5	17102.5	-20966	25664.5	-6907.5	-32481	-19518	14041.5	14767	40927.5	12107.2	11196.5	3664	3979.5
9.83805	14496	12147	10461.2	22060.5	16483.5	18632.2	-18601	30978	9384	-29322	-27151	12808.2	10464	33893	17288.8	21703	-2592	3.5
9.83783	17972	6066.5	131.25	24945	20225	21878	-17502	33949	19151.5	-22561	-27028	1945	19076	22184	17235.8	27053.5	-3507.5	-5057.5
9.83762	13840	2046.5	0	24968.5	15923	23269.2	-14473	31875	19113	-21256	-26300	-7349	24312.5	13221.5	15161	29247.5	-1289	-4682.5
9.83741	8260	-2637	1248.75	22543.5	10528.5	17694.2	-8507	28977	15107	-22709	-27112	-7363	16243	11532	15268.2	29257.5	-4125	2961.5
9.83719	5319	-5832.5	0	17567	12093.5	8352.25	-2898	26798	15548.5	-18256	-26301	151	6297.5	13643	15301.8	27089	-13768.5	10114.5
9.83698	4751	-3976	0	11736	18227.5	3670.75	-545	21595	21654.5	-8070	-24536	10218.8	8262	13586	13104	24623	-23043.5	8385.5
9.83676	7866	778	0	8029.5	22743.5	5642.5	-1496	13928.5	25803.5	-628	-26399	19187.8	17470.5	9968.5	12746.5	24598	-26757.5	-749.5
9.83655	14240	1911	2466.25	7572.5	24305.5	9067.5	-5456	10735.5	21675.5	-507	-31000	22458.8	20826	5050.5	17480	27098.5	-27661.5	-8548.5
9.83634	16138	-2880.5	498	8392.5	22045	11395.5	-11566	14013	14039.5	-4201	-30945	15698	17339.5	222	22844.8	29684	-29125.5	-9579.5
9.83612	8205	-7643	0	7807.5	12456	14809	-15584	16878	13702	-6741	-23339	1940.25	15627	-4209	23561.5	30704.5	-29053	-5568.5
9.83591	-1488	-4824	0	5561	-1780	18616.5	-13504	14668	22993	-6880	-14928	-8437	18029.5	-7029.5	22386	29988	-25041	-280
9.8357	-2381	4654	0	4004.5	-9124.5	18669.5	-8695	10681	32184.5	-6089	-12370	-9356.5	19852.5	-7206	25520.2	26812	-19765	4858.5
9.83548	1797	10800	0	4966.5	-4048	15800.2	-8336	7615	31952	-5886	-12928	-6468	19666	-5808.5	32681.8	20826	-16700	9541
9.83527	451	6246.5	0	7107	3378	15857.2	-11472	3490.5	23427	-6207	-9714	-8267.5	19441.5	-4456	37525.8	15537	-15003	12508
9.83506	-5429	-3726	0	7674.5	1623.5	18898.8	-8813	-229	13089.5	-5505	-1960	-13084	18437.5	-2723.5	35655.5	16622	-12779.5	12842.5
9.83484	-7340	-7418	0	6832	-5763.5	17377.2	2252	2610	3945.5	-3552	5625	-10574.5	16217	1097	28069	24147	-11242.5	12159.5
9.83463	-6472	-2021.5	7175.5	8139	-7155.5	8493	10831	11476	-3493	-3341	11108	4712	16937	7215.5	18992	29874.5	-11507.5	13416
9.83441	-10298	3739	12995.2	13592.5	-270.5	-794.5	6437	17498.5	-6811	-7265	16689	25988.8	21784.5	13283.5	13224.2	26402	-11270	16975.5
9.8342	-15860	3400	10866	20168.5	7281.5	-5602.5	-6875	17898	-4448.5	-12357	22422	40874.2	23059	15929.5	12773.8	17219	-9136.5	19243.5
9.83399	-13716	1338	9776	23107	10350.5	-10287	-16954	20429	143.5	-13339	24367	42203.2	15542	13861.5	13942.2	13122	-8706.5	16864.5
9.83377	-6178	3338.5	12170.2	20867	9613.5	-17577.5	-18973	28103.5	2188.5	-9722	20257	32076	7445.5	10583	11180.8	18859	-13654	11698
9.83356	-4760	6196.5	11917.2	14660.5	5933	-20486.5	-17397	32141.5	950	-5423	12682	18484	8845.5	12693	5155.25	27822.5	-21515.5	9172
9.83335	-10878	4014	6293.25	5363.5	359.5	-13888.5	-16485	27252.5	-2136	-2458	5061	9196.75	14896.5	23085	2246.25	31155.5	-26625	11295.5
9.83313	-15157	-753.5	674.25	-5372.5	-2480.5	-5183	-16276	21426	-6675.5	-353	-1969	6788.5	13092.5	36836.5	4727	28058	-26595.5	14107.5
9.83292	-14440	-1438	876.25	-12514	871	-2477.5	-15995	21938	-10414.5	-871	-8253	7948	3015	46318	7464	24534.5	-22106	13341
9.8327	-13571	1136	6925.5	-11416.5	6078	-71.25	-14653	23510.5	-8149.5	-6556	-11504	8018.25	-4263	48774.5	6484.25	24964	-13783	9629.5
9.83249	-12200	746.5	14506.8	-4731.5	6094	10921.5	-9259	20031.5	696.5	-14234	-9692	6281.75	-4002	45971.5	4313.25	28363.5	-4240.5	6133
9.83228	-6380	-1956.5	18421.5	-508.5	1163	23611.2	1503	16741	8047	-16446	-4003	5868.25	-2108	39293.5	4116.75	31441.5	76	4170.5
9.83206	-1363	596	15747.2	-1596.5	-2842	23244	12215	20004	7569.5	-10789	2688	8837.5	-2646	30334	5319	31671.5	-4625.5	4018.5
9.83185	-5324	9843	9070.75	-1710.5	-4157.5	11719.2	14914	25152.5	4850.5	-2696	8310	13249	-3238.5	23836.5	7851.25	27507	-12685	6841.5
9.83164	-11714	17845.5	4514.25	4969	-6101	6854.5	8845	25696.5	9321.5	1870	10649	15727	-3304	23133.5	13199	19089	-14415	12059.5
9.83142	-6418	20141	3625.75	14923	-9315	15197.2	1442	25216.5	19489.5	1384	6803	15445.2	-5996	23796	17977.2	10151	-7595.5	15520
9.83121	7713	22733	1122.5	20577.5	-10137.5	22273.2	-882	28537.5	25112	-3319	-2793	14510.2	-10925	19219.5	15177.5	6883.5	1650	14458
9.831	12596	30735	0	20823.5	-7294	15650.8	1300	29971.5	21938	-10305	-11609	15308.2	-13953.5	11931.5	6214	12642	8281.5	11744
9.83078	2745	37448	0	20338	-4394.5	2717.75	4270	22755	15003.5	-15566	-12662	18525	-14323.5	10941.5	2092.5	24189.5	12432.5	10843
9.83057	-7529	32617.5	0	20737	-4312	-3199.25	6515	12577	8089.5	-16532	-6676	23192.2	-13679	17538.5	6509.25	34266.5	14325	9865.5
9.83035	-7818	17742.5	9464.5	19476	-5181	-1859.75	8072	9243.5	-615	-16723	-746	27463.8	-9610	23292	8221.25	37424	12232	6366.5
9.83014	-4328	5151	16869	17044.5	-3460	-512.5	7711	11424	-11388.5	-21343	1291	29348	89	24066.5	-1048.25	32889	7771	4574
9.82993	-4651	2675.5	17270	17344.5	1532.5	912.75	3993	11734.5	-20041.5	-29086	2920	27768.8	8193.5	25657.5	-11319.2	23523.5	6927	9533
9.82971	-6741	6014	15409.8	19068.5	6962	6806.25	-1251	10546	-24191	-34498	8251	23660.2	4413	31438.5	-8855.25	14282.5	11686	15708
9.8295	-8118	7190	12159	14829.5	9050.5	14153.5	-2624	12107.5	-25656.5	-37148	15453	19872.2	-8438	34823	2202.25	10674	15026.5	11257.5
9.82929	-10818	4507.5	4334.25	3533.5	6628.5	15397.8	4432	12654.5	-25075	-40657	19332	19430.2	-15494.5	30612	6956.75	14910	9316.5	-4819.5
9.82907	-12651	1259.5	0	-3626.5	2968	9881.75	18603	5756.5	-20423	-43602	17284	23290.2	-8953	24798.5	3531.5	22124	-2673	-18823
9.82886	-7909	-762	0	3047	2757.5	3114.25	32539	-4467	-12185.5	-40450	9849	29303.8	3440.5	24906.5	4423.25	23498.5	-10316.5	-19065.5
9.82865	-367	-1726.5	0	17021	6285.5	-2345.5	38658	-8183	-3981.5	-31898	-1775	33310	10991.5	27939	15177.5	15945.5	-8250.5	-9050.5
9.82843	-926	-42	0	23671.5	8491	-6710.25	35347	-4830.5	2945.5	-24929	-15092	31931.5	11811.5	26806	26220	6689.5	-2226.5	-194.5
9.82822	-9122	6499.5	0	20685	5179.5	-6870.5	27241	-1348	10038	-21141	-25043	25261.5	9375	22724	28380	4924.5	-680.5	1775
9.828	-12199	15764	0	20147.5	-1447.5	226.75	20417	1624	15841	-14402	-27675	17012.2	6007	21681.5	24834.8	10432	-4399	-1388.5
9.82779	-6157	22072	0	29742.5	-4724	9883.75	18565	9279	16457	-2472	-24936	11303.8	3421.5	22967	23608.5	14879	-7478	-6203.5
9.82758	-2009	23339.5	0	42118	106.5	14003.5	22156	19748.5	12127.5	8158	-22575	8876.5	3039	20980.5	26810	13973.5	-6119.5	-9544.5
9.82736	-6702	23375.5	0	46724	11532	12012.8	28119	23662	7046.5	12019	-23331	7079.75	2931	15874	31029.5	12698.5	-2522.5	-9286.5
9.82715	-13235	25221	0	43286	22250.5	9633.25	30771	17332	2404.5	10951	-25078	3968	13.5	13276.5	32207.8	16334.5	-287.5	-7420
9.82694	-14768	26625.5	372.5	37450	24682.5	8389.5	26645	7154.5	-3541.5	7310	-25408	1183.75	-3450	14900.5	27990.5	21442	145.5	-8824.5
9.82672	-13550	25114	6760.5	30268.5	18408	5034.75	18980	659.5	-8554	-206	-24470	1472.5	-1681	17571	20467	20383	12	-13454.5
9.82651	-10667	22727	4646.5	20121.5	11165	586	14207	823	-7538.5	-9845	-22622	4529.5	5509	20265.5	16736	12102.5	-838.5	-14404.5
9.8263	-1849	21050.5	0	10615.5	9788.5	694	13680	8071.5	-1348.5	-14452	-18860	7850.75	12121	24061.5	21054.2	3460.5	-3042	-7636
9.82608	10708	16341	0	7894	11881	6266.25	12759	19967	3645	-11260	-13242	11349	15326.5	26164	27580.8	587.5	-5347	1431
9.82587	16444	6490	0	11662	10206	12095.2	8674	29798.5	5709.5	-7290	-8073	17566	18241.5	22743	27911.8	3029	-5379	5670.5
9.82565	12171	-1044.5	6145	16062.5	3135	15777.5	4477	32696.5	8718	-9772	-4868	25951.2	22116	18153	23957.2	6516	-1952.5	5562.5
9.82544	6533	2686	5975	18418	-4352	19583.2	3230	32115	11702	-16798	-2671	30608.5	23317	22565.5	24179.2	7900	4503	5451
9.82523	4430	13914	1495.75	20202.5	-8172	22140.5	3169	34277	7519.5	-21775	-1395	27101.5	20452	37680.5	28202	6566.5	11887.5	5502.5
9.82501	1351	20060.5	0	20242	-7713	17528	1946	38743	-4969	-21622	-3904	19192.2	17560.5	51778.5	26601.2	3916	15604	3876.5
9.8248	-2582	17825.5	0	14998	-2676	5934	1445	40747	-17137.5	-16901	-11458	14699	17216.5	52954	17444.2	2866.5	11187	2825.5
9.82459	850	16407	0	6690.5	5731	-3411.25	4050	39352.5	-22974	-9761	-19239	15841	16407.5	42642.5	10966.8	6077	696.5	5470.5
9.82437	11284	20558.5	3714.5	3352	11603.5	-4768.5	7213	36143	-25610	-5539	-21064	18121.5	12375.5	32204	13272	13213	-6935.5	9370
9.82416	15826	22446.5	11023	7756	9876.5	-3967.5	6439	29522	-27070.5	-10454	-18143	18246	7569.5	29069.5	16338.5	20409.5	-6482	10191
9.82394	9543	16078.5	13755.5	12790.5	4628	-8257.75	1895	18370.5	-22210	-23434	-18285	17667.8	5975	30149.5	11064	22829	-4389.5	9296.5
9.82373	4510	8997	9079.5	11615	4252.5	-14368.5	-2346	8343	-9758	-35184	-24820	17080.2	8497	28225.5	1324.75	18077	-10248	10560
9.82352	9800	10922	4031.25	6689.5	8927	-13742.2	-4401	6266	408	-38618	-30766	13206.8	13695.5	21852	-2956.75	8548.5	-22061	11742.5
9.8233	17349	18848	6523.75	4131	11168	-5718	-5658	10518	-101	-35129	-27592	4857.75	19043	16860.5	-95.5	995.5	-27356	6810
9.82309	17356	22947.5	13736.8	4273.5	8537	1643.25	-6321	14497	-6063	-28668	-16716	-2035.25	20464	17981.5	4065	1461.5	-19512.5	-3959.5
9.82288	13556	21249.5	16324.2	4035	6369.5	2430.5	-4113	17121.5	-8042	-20458	-7242	-565.75	15415	21811.5	6160.5	8799.5	-6137	-13666.5
9.82266	12366	18744	12347.5	5179	7164	-1159.5	1798	22216	-6865.5	-12450	-3310	7753	7981.5	21749	6800.75	15457.5	778.5	-18579
9.82245	9761	16540	9454.75	12896	6956	-3618.75	8588	29703	-8973.5	-8796	286	14223.5	6618.5	18357	5683.25	16989	-2567.5	-21298.5
9.82224	806	12169	12753.8	26508	3843.5	-2707.75	12540	34965	-13251.5	-10008	8061	12958.5	15191.5	18653	2637.25	17796	-11229	-23834.5
9.82202	-8336	8055.5	17874	37679	565	-483.5	12202	35388.5	-13202	-11872	14982	6198	29450.5	24329	1130.75	23494.5	-18147	-24544
9.82181	-9425	9727	18815.2	39306.5	-3155	87.25	8386	31304	-8596	-12698	12557	336.25	42375	28155.5	4000	30537.5	-18702	-23055
9.82159	-4603	16258.5	16445.2	32245	-10847.5	-1098.75	2890	23159	-4917.5	-14464	840	-102.5	48837	25570	7358.25	29803	-13164	-21782.5
9.82138	-264	20928.5	14728.2	22278.5	-19623	-874	-2146	14205	-3579	-14798	-11452	4791.75	45525	22322.5	5022.5	19843	-7466.5	-20967
9.82117	3094	21176	13218	14332.5	-20763	2830.5	-5073	12512.5	-1840.5	-7787	-18099	10321.5	32229	24676.5	-1932.75	9724	-8074.5	-18165.5
9.82095	6292	20393.5	9048.75	11172	-13161	6865	-5919	22576	-351.5	3230	-20901	10559	14723.5	28756	-5811	7132	-14460	-14207
9.82074	5658	20032.5	3805.75	13754	-5914	5903	-6151	37100.5	-1820.5	4566	-23075	4943.5	1460	27567	-2379.25	9840	-20429.5	-13616.5
9.82053	692	17531.5	2369.25	19443	-3980.5	-324.75	-6563	44238.5	-3671	-9236	-23031	480.5	-4561.5	23410	4386.75	11872	-23440	-17091.5
9.82031	-866	12848	5415.5	22008	-1773	-6234.25	-5651	41286	-882	-25655	-18081	3497.75	-7107.5	23970.5	7892	12557	-27032	-19443
9.8201	5851	10201	8161	17331.5	4721.5	-7401.5	-966	35281	4680.5	-31104	-10282	10486	-9226.5	29176	5690.25	15058.5	-32672.5	-17652
9.81989	14634	11745	7087.75	9092	10136.5	-4830.75	7257	32557	6331	-28346	-4565	12564.8	-8849.5	31619	751.25	19884	-35893.5	-15296
9.81967	18629	14930	3923	5717.5	9337.5	-1726.5	14454	33786	3633.5	-27241	-3581	8763.5	-3315	28795	-1176.5	24768.5	-33734.5	-15555
9.81946	20340	17333.5	2426	10761.5	5261	-368.5	15445	37000	2955	-26950	-7476	7947.5	5577	25674	3859	28700	-29934	-14927.5
9.81924	23246	19468.5	4632.25	18608	2191	-3080.75	10278	39736	6533	-19967	-15606	15302.2	13147.5	25089	13362.5	31610.5	-28831.5	-8277.5
9.81903	22536	21953.5	10280	21297	479.5	-10936.8	4331	39982.5	9377.5	-8087	-24363	23597.8	16268	24432	19398.8	31693.5	-29517.5	3415
9.81882	13443	24133	16228	17605.5	1909.5	-19125.5	1646	38906.5	8565.5	-764	-26382	22716.2	15320	23116.5	16924	27371.5	-29894	14397.5
9.8186	1197	25977.5	16800	12798.5	9812	-19002.5	799	39706	7626	333	-17696	13271.5	13608	25057	9635.75	21290	-30941	20825
9.81839	-6414	27644.5	9497.25	10621	19682.5	-8673.5	-638	41283	8838.5	2720	-4290	5084.5	14987	31276.5	4814	18533.5	-32671	22987
9.81818	-9738	27384	488	9321	21323.5	2614.75	-992	38578	8093.5	8808	4098	4584.5	20283.5	36931	4633.5	20713.5	-31437	23078.5
9.81796	-12504	23683	0	6252	15106	4817.5	2068	31935.5	1574	11019	5743	8920.25	26347	38498.5	6269.75	24587	-26028	23315.5
9.81775	-13231	18802.5	3806.75	2533	13362	-1417	5543	28449	-7130.5	3420	6389	11438.5	29849.5	38037.5	8021.25	26426	-20998	24251
9.81754	-9823	16087.5	6120.25	572.5	19886	-7450.75	4306	30107	-10713.5	-9935	7453	8724	30634	37572.5	10064.8	25225.5	-18882	23253.5
9.81732	-6493	14830	1766.25	-223	22447.5	-7601.5	-449	30023.5	-6509	-20773	2811	2706	30007	34727.5	10764.8	21755.5	-14893.5	17325
9.81711	-7651	12324	0	-1709	13892.5	-3082.5	-1848	25965	1369	-24543	-9923	-1146.5	28178	27532	8484.25	17168.5	-5433.5	9003
9.81689	-9894	9862	5746.25	-2687.5	5975	2365.25	2766	26781.5	6542.5	-21117	-21943	1333	25190.5	19551	6865.25	13135.5	3865	5938
9.81668	-7619	11281.5	15958.5	-486	11041	6115.75	7836	37252	5680	-13031	-22371	7525.25	21520.5	16572	11698.2	11306	5787.5	12134.5
9.81647	-2189	15927	19405.5	3689.5	23013.5	7207.5	7000	47338	771.5	-5084	-10856	9499	16003.5	20209	21197.5	11726	2282.5	22828.5
9.81625	1130	18409.5	16970.5	5433.5	29018	6772.5	61	46778.5	-3397	-1530	3374	4021.25	7072	26965.5	25855.2	12829	21.5	30634.5
9.81604	1399	15784	18437.2	3900.5	28043	6896.25	-8971	40390.5	-4835.5	-2143	11959	-1669	-2001.5	32207.5	20738.8	13377	-156	33341.5
9.81583	1613	10237.5	26271.2	3503	24953	7099	-16440	37392.5	-6081	-3649	13030	1584.75	-4400.5	34080.5	11955.2	13609.5	-970	32567
9.81561	3717	4403	31560	6675	17434.5	4609.5	-19927	35316.5	-8771.5	-5171	9598	13026.8	581.5	34668	6938.75	14337.5	-118	28468
9.8154	7801	-1241	27300	8733	3726.5	361.25	-18748	27856	-9336	-9095	6840	23941	5108.5	37079.5	4122.25	15539	6039.5	20540
9.81518	12074	-5601	17666	3542.5	-6481.5	478.25	-15545	19981	-3895	-16532	8756	29263.8	4120.5	40444.5	-1575	16160	12718	11408
9.81497	11528	-6139.5	11317.8	-7798.5	-4617.5	7460.25	-13890	20362	4669.5	-24806	13416	30775.5	2404.5	39785.5	-7348.25	15473.5	10976.5	4856
9.81476	2730	-2334.5	11542	-17784.5	1160.5	13700.5	-13008	25575.5	9489.5	-29753	13628	29928.5	5003.5	33037	-4999.75	14802	1290	749
9.81454	-8314	3000.5	15973.2	-21168	-1714.5	9877.75	-8742	26956.5	8759	-29033	6310	25358.2	8019	25397	5827	16832	-6773	-4090.5
9.81433	-10980	6718.5	21163.5	-19141	-9556.5	-1909	-869	27321.5	7243	-24126	-1568	18681.5	6485	23255.5	14717.8	21789.5	-8757.5	-10409
9.81412	-5069	7661.5	24121.8	-14815.5	-9982	-9417.25	5140	35121.5	8702	-20276	-1575	15168.2	4394	26544	12938.8	25447.5	-9802	-15577.5
9.8139	-1879	6510.5	22791.8	-8563	-3808	-4630.75	5428	46371	11256	-22187	3917	15561.5	7571	31104.5	3190.5	23859.5	-13738	-17992.5
9.81369	-6876	5458	18128.5	-137	-2404	7791.5	2400	48501	11036	-27933	4623	13647.8	12470.5	35349	-5580.5	19652.5	-17052	-18883
9.81348	-11466	6854	13761	7141	-7275.5	16756.8	255	39813.5	7005	-29911	-3141	6060.5	12423	39318.5	-8168.75	19545.5	-16517	-19398
9.81326	-7373	9894	11785.5	7942	-9055.5	15798.5	359	30311	1495.5	-24021	-11955	-858	10102	40473	-4717.5	24664	-14546.5	-19069
9.81305	572	10561.5	10585.5	979	-4857	7716.75	2763	25271.5	-1519.5	-14743	-14745	1081.5	12478	37094	3019.75	27898.5	-13321	-18044.5
9.81283	2946	7107.5	7668.5	-8563.5	-1175	995.75	7279	22230	1078.5	-8601	-14032	10984	17203	33182	12130.2	23499.5	-10792	-18054.5
9.81262	-995	2689.5	2650.5	-13376	-538.5	1555.5	10786	22089	8106	-6403	-16137	20601.5	16123	32548.5	17852.5	15088.5	-6668.5	-19662.5
9.81241	-5593	-134	0	-9639	521.5	6508.5	8891	28554.5	13670	-5630	-21287	24268.2	10012.5	30550	17453.8	10140.5	-6085	-20520.5
9.81219	-7685	-3371	0	1486.5	1086	7689	3211	37547.5	12958	-6482	-24272	22778.5	7521.5	20749.5	14047.5	9826.5	-12529.5	-18072
9.81198	-6893	-8112	0	15346.5	-3013	2642.5	1750	40883.5	7718.5	-10712	-22090	19731.8	10494	8444	12795.8	9358	-21855.5	-12847
9.81177	-2909	-9928.5	0	25445	-8385	-1902	8562	39408.5	3464	-17007	-16521	18480.5	12463.5	6917	14142.2	6458	-27532	-7360
9.81155	1953	-5437.5	0	26639	-7419	-599	17912	39478.5	2712.5	-22298	-10682	21211.2	11789.5	18892	14465.8	4001.5	-27923	-2355.5
9.81134	2618	801	0	20328	-1837.5	1821.25	22143	38605	4070	-25765	-6885	26893.8	14166.5	31967.5	12574.5	4403.5	-24787	3691.5
9.81113	-2069	2467	0	15203	-402	-1346.5	20071	28850	6118	-27500	-6891	30718.8	20653.5	35640.5	11261.8	6114	-18770.5	10569.5
[truncated: 41,221 more rows]

## Sheet: Sheet 3-Data_LipExt
Groups	Controls	Controls	Controls	Controls	Controls	Controls	PLLA0	PLLA0	PLLA0	PLLA0	PLLA0	PLLA0	PLLA-	PLLA-	PLLA-	PLLA-	PLLA-	PLLA-
[truncated: 38,499 more rows]
